# Supplementary material for: Applicability of the inverse dispersion method to measure emissions from animal housings
Source: Copernicus journal article supplement (doi:10.5194/amt-2023-258), 2024-02-05
Supplement: Supplementary file 1 [file amt-2023-258-supplement.zip]

Archive with 2 entries (2 files):
- 20231215_AMT_supporting_information.pdf
- Supporting information - data.xlsx
