# Supplementary material for: Applicability of the inverse dispersion method to measure emissions from animal housings
Source: Copernicus journal article supplement (doi:10.5194/amt-2023-258), 2024-02-05
Supplement: Supplementary file 1 [file amt-2023-258-supplement.zip › Supporting information - data.xlsx]

## Sheet: Readme
Explanation of colums
Note, for each time interval there is a row for each OP-UA combination. Thus, there are up to 20 rows for one time interval. If you prefer columns instead of rows use a dcast function. The following columns are unique: CQ, CQ_se, N_TD, Emission, Recovery_rate
Abbreviation used in the measurment data sheet	Full name of variable with units
st	Start date and time of the 10 min interval
OP	OP device name
UA	Name of 3D ultrasonic anemometer (UA)
Campaign	Campaign name
SourceArea	Area of the source (barn) [m2]
WD	Wind direction recorded by the UA [°]
sd_WD	Standard deviation of the WD recorded by the UA [°]
U_UA	Wind speed recorded by the UA [m s-1]
Ustar	Friction velocity u* [m s-1]
L	Monin-Obukhov length [m]
Zo	Roughness length [m]
sUu	Standard deviation of the alongwind (u) divided by u*
sVu	Standard deviation of the crosswind (v) divided by u*
sWu	Standard deviation of the verticalwind (w) divided by u*
C0	Kolmogorov constant of the Lagrangian structure function
z_canopy	Canopy height used in the bLS model
Temp_WS	Temperature recorded by the Weather station (WS) [°C]
WD_WS	Wind direction recorded by the WS [°]
U_WS	Wind speed recorded by the WS [m s-1]
Press_WS	Pressure recorded by the WS [hPa]
Dew_Point_WS	Dew point recorded by the WS [°C]
Rel_Hum_WS	Relative humidity recorded by the WS [%]
Rad_WS	Global radiation recorded by the WS []
Precip_WS	Precipitation recorded by the WS [mm]
Temp_MFC	Temperature recorded by the mass flow controller (MFC) [°C]
Setpoint_MFC	Setpoint of the MFC [Ln min-1]
Flow_MFC	Flow recorded by the MFC [Ln min-1]
Q_MFC	Mass flow determined by the MFC [kg h-1]
Q_MFCex	Mass flow determined by the MFC but extended to the periods where no computer was attached to the MFC but there was still a flow [kg h-1]
Temp_CC	Temperature recorded by the pressure sensor [°C]
Press_CC	Pressure recorded by the pressure sensor [hPa]
CQ	bLS dispersion factor [s m-1]
CQ_se	Standard error of the bLS dispersion factor [s m-1]
N_TD	Total number of touchdowns in the source
Concentration	CH4 concentration [mg m-3]
Emission	Determined emission [kg h-1]
Recovery_rate	IDM recovery rate [%]

## Sheet: Data
st	OP	UA	Campaign	SourceArea	WD	sd_WD	U_UA	Ustar	L	Zo	sUu	sVu	sWu	C0	z_canopy	Temp_WS	WD_WS	U_WS	Press_WS	Dew_Point_WS	Rel_Hum_WS	Rad_WS	Precip_WS	Temp_MFC	Setpoint_MFC	Flow_MFC	Q_MFC	Q_MFCex	Temp_CC	Press_CC	CQ	CQ_se	N_TD	Concentration	Emission	Recovery_rate
2021-03-18 15:10:00	OP-100m	UA-UW	MC	451.591	71.741	11.1408	3.94908	0.24335	-15.6	0.002166	3.259	2.998	1.35	4.157	0.2	4.62796	59.2442	3.76755	968.213	-3.9602	53.6031	414.116	0	NA	NA	NA	NA	0	NA	NA	NA	2.31967e-06	849993	1.30474	NA	NA
2021-03-18 15:10:00	OP-150m	UA-UW	MC	451.591	71.741	11.1408	3.94908	0.24335	-15.6	0.002166	3.259	2.998	1.35	4.157	0.2	4.62796	59.2442	3.76755	968.213	-3.9602	53.6031	414.116	0	NA	NA	NA	NA	0	NA	NA	NA	9.55195e-07	138170	1.30505	NA	NA
2021-03-18 15:10:00	OP-200m	UA-UW	MC	451.591	71.741	11.1408	3.94908	0.24335	-15.6	0.002166	3.259	2.998	1.35	4.157	0.2	4.62796	59.2442	3.76755	968.213	-3.9602	53.6031	414.116	0	NA	NA	NA	NA	0	NA	NA	NA	3.89204e-07	23107	1.29903	NA	NA
2021-03-18 15:10:00	OP-50m	UA-UW	MC	451.591	71.741	11.1408	3.94908	0.24335	-15.6	0.002166	3.259	2.998	1.35	4.157	0.2	4.62796	59.2442	3.76755	968.213	-3.9602	53.6031	414.116	0	NA	NA	NA	NA	0	NA	NA	0.00049407	5.15583e-06	2888967	1.31685	NA	NA
2021-03-18 15:10:00	OP-UW	UA-UW	MC	451.591	71.741	11.1408	3.94908	0.24335	-15.6	0.002166	3.259	2.998	1.35	4.157	0.2	4.62796	59.2442	3.76755	968.213	-3.9602	53.6031	414.116	0	NA	NA	NA	NA	0	NA	NA	0	NA	0	NA	NA	NA
2021-03-18 15:20:00	OP-100m	UA-UW	MC	451.591	77.534	13.3364	3.00914	0.194838	-6.9	0.002336	3.724	3.136	1.449	3.952	0.2	4.46327	69.8828	3.39062	968.113	-4.07653	54.2602	391.244	0	NA	NA	NA	NA	0	NA	NA	NA	1.89419e-06	272632	1.3052	NA	NA
2021-03-18 15:20:00	OP-150m	UA-UW	MC	451.591	77.534	13.3364	3.00914	0.194838	-6.9	0.002336	3.724	3.136	1.449	3.952	0.2	4.46327	69.8828	3.39062	968.113	-4.07653	54.2602	391.244	0	NA	NA	NA	NA	0	NA	NA	NA	3.86581e-07	22935	1.30412	NA	NA
2021-03-18 15:20:00	OP-200m	UA-UW	MC	451.591	77.534	13.3364	3.00914	0.194838	-6.9	0.002336	3.724	3.136	1.449	3.952	0.2	4.46327	69.8828	3.39062	968.113	-4.07653	54.2602	391.244	0	NA	NA	NA	NA	0	NA	NA	NA	2.1585e-07	4656	1.29993	NA	NA
2021-03-18 15:20:00	OP-50m	UA-UW	MC	451.591	77.534	13.3364	3.00914	0.194838	-6.9	0.002336	3.724	3.136	1.449	3.952	0.2	4.46327	69.8828	3.39062	968.113	-4.07653	54.2602	391.244	0	NA	NA	NA	NA	0	NA	NA	0.000460752	5.20417e-06	2118696	1.31708	0.0287383	NA
2021-03-18 15:20:00	OP-UW	UA-UW	MC	451.591	77.534	13.3364	3.00914	0.194838	-6.9	0.002336	3.724	3.136	1.449	3.952	0.2	4.46327	69.8828	3.39062	968.113	-4.07653	54.2602	391.244	0	NA	NA	NA	NA	0	NA	NA	0	NA	0	1.31341	NA	NA
2021-03-18 15:30:00	OP-100m	UA-UW	MC	451.591	57.596	25.9044	2.62852	0.0963723	-0.6	5.638e-05	9.731	9.307	3.491	7.133	0.2	4.79428	64.5323	2.84531	968.013	-3.70306	53.7969	490.114	0	NA	NA	NA	NA	0	NA	NA	NA	3.19453e-06	257100	1.30294	NA	NA
2021-03-18 15:30:00	OP-150m	UA-UW	MC	451.591	57.596	25.9044	2.62852	0.0963723	-0.6	5.638e-05	9.731	9.307	3.491	7.133	0.2	4.79428	64.5323	2.84531	968.013	-3.70306	53.7969	490.114	0	NA	NA	NA	NA	0	NA	NA	NA	2.25763e-06	108761	1.30055	NA	NA
2021-03-18 15:30:00	OP-200m	UA-UW	MC	451.591	57.596	25.9044	2.62852	0.0963723	-0.6	5.638e-05	9.731	9.307	3.491	7.133	0.2	4.79428	64.5323	2.84531	968.013	-3.70306	53.7969	490.114	0	NA	NA	NA	NA	0	NA	NA	NA	1.45371e-06	58023	1.30132	NA	NA
2021-03-18 15:30:00	OP-50m	UA-UW	MC	451.591	57.596	25.9044	2.62852	0.0963723	-0.6	5.638e-05	9.731	9.307	3.491	7.133	0.2	4.79428	64.5323	2.84531	968.013	-3.70306	53.7969	490.114	0	NA	NA	NA	NA	0	NA	NA	NA	5.64458e-06	789344	1.30949	NA	NA
2021-03-18 15:30:00	OP-UW	UA-UW	MC	451.591	57.596	25.9044	2.62852	0.0963723	-0.6	5.638e-05	9.731	9.307	3.491	7.133	0.2	4.79428	64.5323	2.84531	968.013	-3.70306	53.7969	490.114	0	NA	NA	NA	NA	0	NA	NA	NA	NA	0	1.31051	NA	NA
2021-03-18 15:30:00	OP-100m	UA-150m	MC	451.591	104.923	29.801	2.60815	0.158318	-2.5	0.001005	6.497	4.994	2.008	4.885	0.08	4.79428	64.5323	2.84531	968.013	-3.70306	53.7969	490.114	0	NA	NA	NA	NA	0	NA	NA	NA	3.36224e-07	9188	1.30294	NA	NA
2021-03-18 15:30:00	OP-150m	UA-150m	MC	451.591	104.923	29.801	2.60815	0.158318	-2.5	0.001005	6.497	4.994	2.008	4.885	0.08	4.79428	64.5323	2.84531	968.013	-3.70306	53.7969	490.114	0	NA	NA	NA	NA	0	NA	NA	NA	5.63807e-08	648	1.30055	NA	NA
2021-03-18 15:30:00	OP-200m	UA-150m	MC	451.591	104.923	29.801	2.60815	0.158318	-2.5	0.001005	6.497	4.994	2.008	4.885	0.08	4.79428	64.5323	2.84531	968.013	-3.70306	53.7969	490.114	0	NA	NA	NA	NA	0	NA	NA	NA	9.32158e-09	99	1.30132	NA	NA
2021-03-18 15:30:00	OP-50m	UA-150m	MC	451.591	104.923	29.801	2.60815	0.158318	-2.5	0.001005	6.497	4.994	2.008	4.885	0.08	4.79428	64.5323	2.84531	968.013	-3.70306	53.7969	490.114	0	NA	NA	NA	NA	0	NA	NA	NA	1.54387e-06	187723	1.30949	NA	NA
2021-03-18 15:30:00	OP-UW	UA-150m	MC	451.591	104.923	29.801	2.60815	0.158318	-2.5	0.001005	6.497	4.994	2.008	4.885	0.08	4.79428	64.5323	2.84531	968.013	-3.70306	53.7969	490.114	0	NA	NA	NA	NA	0	NA	NA	1.18317e-09	1.18317e-09	16	1.31051	NA	NA
2021-03-18 15:40:00	OP-100m	UA-UW	MC	451.591	6.479	15.7407	3.91739	0.308502	-42.7	0.01081	2.9	2.607	1.412	5.13	0.2	4.62164	29.1996	3.55427	968	-3.1194	58.3142	139.871	0	NA	NA	NA	NA	0	NA	NA	NA	2.84172e-07	47605	NA	NA	NA
2021-03-18 15:40:00	OP-150m	UA-UW	MC	451.591	6.479	15.7407	3.91739	0.308502	-42.7	0.01081	2.9	2.607	1.412	5.13	0.2	4.62164	29.1996	3.55427	968	-3.1194	58.3142	139.871	0	NA	NA	NA	NA	0	NA	NA	NA	2.58731e-08	1116	NA	NA	NA
2021-03-18 15:40:00	OP-200m	UA-UW	MC	451.591	6.479	15.7407	3.91739	0.308502	-42.7	0.01081	2.9	2.607	1.412	5.13	0.2	4.62164	29.1996	3.55427	968	-3.1194	58.3142	139.871	0	NA	NA	NA	NA	0	NA	NA	NA	1.44468e-08	106	1.30371	NA	NA
2021-03-18 15:40:00	OP-50m	UA-UW	MC	451.591	6.479	15.7407	3.91739	0.308502	-42.7	0.01081	2.9	2.607	1.412	5.13	0.2	4.62164	29.1996	3.55427	968	-3.1194	58.3142	139.871	0	NA	NA	NA	NA	0	NA	NA	NA	3.0447e-06	2119379	1.30677	NA	NA
2021-03-18 15:40:00	OP-UW	UA-UW	MC	451.591	6.479	15.7407	3.91739	0.308502	-42.7	0.01081	2.9	2.607	1.412	5.13	0.2	4.62164	29.1996	3.55427	968	-3.1194	58.3142	139.871	0	NA	NA	NA	NA	0	NA	NA	0	NA	0	1.30807	NA	NA
2021-03-18 15:40:00	OP-100m	UA-150m	MC	451.591	64.266	17.6966	4.08946	0.271375	-69	0.00456	3.238	2.981	1.394	5.153	0.08	4.62164	29.1996	3.55427	968	-3.1194	58.3142	139.871	0	NA	NA	NA	NA	0	NA	NA	0.000255554	3.02586e-06	1879806	NA	NA	NA
2021-03-18 15:40:00	OP-150m	UA-150m	MC	451.591	64.266	17.6966	4.08946	0.271375	-69	0.00456	3.238	2.981	1.394	5.153	0.08	4.62164	29.1996	3.55427	968	-3.1194	58.3142	139.871	0	NA	NA	NA	NA	0	NA	NA	NA	1.7203e-06	754554	NA	NA	NA
2021-03-18 15:40:00	OP-200m	UA-150m	MC	451.591	64.266	17.6966	4.08946	0.271375	-69	0.00456	3.238	2.981	1.394	5.153	0.08	4.62164	29.1996	3.55427	968	-3.1194	58.3142	139.871	0	NA	NA	NA	NA	0	NA	NA	NA	1.11093e-06	253519	1.30371	NA	NA
2021-03-18 15:40:00	OP-50m	UA-150m	MC	451.591	64.266	17.6966	4.08946	0.271375	-69	0.00456	3.238	2.981	1.394	5.153	0.08	4.62164	29.1996	3.55427	968	-3.1194	58.3142	139.871	0	NA	NA	NA	NA	0	NA	NA	0.000486879	4.33197e-06	3556390	1.30677	-0.00956134	NA
2021-03-18 15:40:00	OP-UW	UA-150m	MC	451.591	64.266	17.6966	4.08946	0.271375	-69	0.00456	3.238	2.981	1.394	5.153	0.08	4.62164	29.1996	3.55427	968	-3.1194	58.3142	139.871	0	NA	NA	NA	NA	0	NA	NA	0	NA	0	1.30807	NA	NA
2021-03-18 15:50:00	OP-100m	UA-UW	MC	451.591	46.199	21.7723	3.31332	0.293706	-105.1	0.02075	2.838	3.266	1.351	4.937	0.2	3.96429	25.3677	4.17184	968	-2.9704	60.8163	44.593	0	NA	NA	NA	NA	0	NA	NA	0.00028131	2.96509e-06	2166280	NA	NA	NA
2021-03-18 15:50:00	OP-150m	UA-UW	MC	451.591	46.199	21.7723	3.31332	0.293706	-105.1	0.02075	2.838	3.266	1.351	4.937	0.2	3.96429	25.3677	4.17184	968	-2.9704	60.8163	44.593	0	NA	NA	NA	NA	0	NA	NA	0.000192304	2.3489e-06	1487938	NA	NA	NA
2021-03-18 15:50:00	OP-200m	UA-UW	MC	451.591	46.199	21.7723	3.31332	0.293706	-105.1	0.02075	2.838	3.266	1.351	4.937	0.2	3.96429	25.3677	4.17184	968	-2.9704	60.8163	44.593	0	NA	NA	NA	NA	0	NA	NA	0.000141401	2.62661e-06	1089808	NA	NA	NA
2021-03-18 15:50:00	OP-50m	UA-UW	MC	451.591	46.199	21.7723	3.31332	0.293706	-105.1	0.02075	2.838	3.266	1.351	4.937	0.2	3.96429	25.3677	4.17184	968	-2.9704	60.8163	44.593	0	NA	NA	NA	NA	0	NA	NA	0.000471797	4.10215e-06	3657578	1.30746	-0.0585297	NA
2021-03-18 15:50:00	OP-UW	UA-UW	MC	451.591	46.199	21.7723	3.31332	0.293706	-105.1	0.02075	2.838	3.266	1.351	4.937	0.2	3.96429	25.3677	4.17184	968	-2.9704	60.8163	44.593	0	NA	NA	NA	NA	0	NA	NA	0	NA	0	1.31513	NA	NA
2021-03-18 15:50:00	OP-100m	UA-150m	MC	451.591	89.114	19.8163	3.61301	0.290964	-1922.8	0.0146	3.236	3.622	1.254	4.424	0.08	3.96429	25.3677	4.17184	968	-2.9704	60.8163	44.593	0	NA	NA	NA	NA	0	NA	NA	NA	6.73042e-07	141595	NA	NA	NA
2021-03-18 15:50:00	OP-150m	UA-150m	MC	451.591	89.114	19.8163	3.61301	0.290964	-1922.8	0.0146	3.236	3.622	1.254	4.424	0.08	3.96429	25.3677	4.17184	968	-2.9704	60.8163	44.593	0	NA	NA	NA	NA	0	NA	NA	NA	2.07464e-07	16626	NA	NA	NA
2021-03-18 15:50:00	OP-200m	UA-150m	MC	451.591	89.114	19.8163	3.61301	0.290964	-1922.8	0.0146	3.236	3.622	1.254	4.424	0.08	3.96429	25.3677	4.17184	968	-2.9704	60.8163	44.593	0	NA	NA	NA	NA	0	NA	NA	NA	1.18381e-07	3710	NA	NA	NA
2021-03-18 15:50:00	OP-50m	UA-150m	MC	451.591	89.114	19.8163	3.61301	0.290964	-1922.8	0.0146	3.236	3.622	1.254	4.424	0.08	3.96429	25.3677	4.17184	968	-2.9704	60.8163	44.593	0	NA	NA	NA	NA	0	NA	NA	0.000211737	2.40397e-06	1569361	1.30746	-0.130417	NA
2021-03-18 15:50:00	OP-UW	UA-150m	MC	451.591	89.114	19.8163	3.61301	0.290964	-1922.8	0.0146	3.236	3.622	1.254	4.424	0.08	3.96429	25.3677	4.17184	968	-2.9704	60.8163	44.593	0	NA	NA	NA	NA	0	NA	NA	0	NA	0	1.31513	NA	NA
2021-03-18 16:00:00	OP-100m	UA-UW	MC	451.591	67.652	18.135	2.92151	0.14926	-15.4	0.0005708	5.067	5.949	1.983	9.849	0.2	3.56041	64.04	3.46858	968	-3.1296	62.353	52.359	0	NA	NA	NA	NA	0	NA	NA	NA	3.60501e-06	1157615	NA	NA	NA
2021-03-18 16:00:00	OP-150m	UA-UW	MC	451.591	67.652	18.135	2.92151	0.14926	-15.4	0.0005708	5.067	5.949	1.983	9.849	0.2	3.56041	64.04	3.46858	968	-3.1296	62.353	52.359	0	NA	NA	NA	NA	0	NA	NA	NA	2.2952e-06	491049	NA	NA	NA
2021-03-18 16:00:00	OP-200m	UA-UW	MC	451.591	67.652	18.135	2.92151	0.14926	-15.4	0.0005708	5.067	5.949	1.983	9.849	0.2	3.56041	64.04	3.46858	968	-3.1296	62.353	52.359	0	NA	NA	NA	NA	0	NA	NA	NA	1.50687e-06	224773	NA	NA	NA
2021-03-18 16:00:00	OP-50m	UA-UW	MC	451.591	67.652	18.135	2.92151	0.14926	-15.4	0.0005708	5.067	5.949	1.983	9.849	0.2	3.56041	64.04	3.46858	968	-3.1296	62.353	52.359	0	NA	NA	NA	NA	0	NA	NA	NA	6.92241e-06	2911076	1.31001	NA	NA
2021-03-18 16:00:00	OP-UW	UA-UW	MC	451.591	67.652	18.135	2.92151	0.14926	-15.4	0.0005708	5.067	5.949	1.983	9.849	0.2	3.56041	64.04	3.46858	968	-3.1296	62.353	52.359	0	NA	NA	NA	NA	0	NA	NA	NA	NA	0	1.32018	NA	NA
2021-03-18 16:00:00	OP-100m	UA-150m	MC	451.591	82.814	15.9746	3.01588	0.208855	-82.6	0.005962	3.034	4.214	1.429	5.482	0.08	3.56041	64.04	3.46858	968	-3.1296	62.353	52.359	0	NA	NA	NA	NA	0	NA	NA	NA	1.45955e-06	354417	NA	NA	NA
2021-03-18 16:00:00	OP-150m	UA-150m	MC	451.591	82.814	15.9746	3.01588	0.208855	-82.6	0.005962	3.034	4.214	1.429	5.482	0.08	3.56041	64.04	3.46858	968	-3.1296	62.353	52.359	0	NA	NA	NA	NA	0	NA	NA	NA	6.02698e-07	65701	NA	NA	NA
2021-03-18 16:00:00	OP-200m	UA-150m	MC	451.591	82.814	15.9746	3.01588	0.208855	-82.6	0.005962	3.034	4.214	1.429	5.482	0.08	3.56041	64.04	3.46858	968	-3.1296	62.353	52.359	0	NA	NA	NA	NA	0	NA	NA	NA	2.72445e-07	16538	NA	NA	NA
2021-03-18 16:00:00	OP-50m	UA-150m	MC	451.591	82.814	15.9746	3.01588	0.208855	-82.6	0.005962	3.034	4.214	1.429	5.482	0.08	3.56041	64.04	3.46858	968	-3.1296	62.353	52.359	0	NA	NA	NA	NA	0	NA	NA	0.000366084	3.94932e-06	2158943	1.31001	-0.0999851	NA
2021-03-18 16:00:00	OP-UW	UA-150m	MC	451.591	82.814	15.9746	3.01588	0.208855	-82.6	0.005962	3.034	4.214	1.429	5.482	0.08	3.56041	64.04	3.46858	968	-3.1296	62.353	52.359	0	NA	NA	NA	NA	0	NA	NA	0	NA	0	1.32018	NA	NA
2021-03-18 16:10:00	OP-100m	UA-UW	MC	451.591	66.85	12.8539	2.75026	0.253498	-72.5	0.02398	2.864	2.277	1.103	3.472	0.2	3.46143	67.8308	2.81143	968	-2.58673	64.3184	83.6649	0	NA	NA	NA	NA	0	NA	NA	0.000284189	3.32608e-06	1566274	NA	NA	NA
2021-03-18 16:10:00	OP-150m	UA-UW	MC	451.591	66.85	12.8539	2.75026	0.253498	-72.5	0.02398	2.864	2.277	1.103	3.472	0.2	3.46143	67.8308	2.81143	968	-2.58673	64.3184	83.6649	0	NA	NA	NA	NA	0	NA	NA	NA	1.6812e-06	458654	NA	NA	NA
2021-03-18 16:10:00	OP-200m	UA-UW	MC	451.591	66.85	12.8539	2.75026	0.253498	-72.5	0.02398	2.864	2.277	1.103	3.472	0.2	3.46143	67.8308	2.81143	968	-2.58673	64.3184	83.6649	0	NA	NA	NA	NA	0	NA	NA	NA	8.19082e-07	112443	NA	NA	NA
2021-03-18 16:10:00	OP-50m	UA-UW	MC	451.591	66.85	12.8539	2.75026	0.253498	-72.5	0.02398	2.864	2.277	1.103	3.472	0.2	3.46143	67.8308	2.81143	968	-2.58673	64.3184	83.6649	0	NA	NA	NA	NA	0	NA	NA	0.000643603	9.65729e-06	3466456	1.30582	-0.0128783	NA
2021-03-18 16:10:00	OP-UW	UA-UW	MC	451.591	66.85	12.8539	2.75026	0.253498	-72.5	0.02398	2.864	2.277	1.103	3.472	0.2	3.46143	67.8308	2.81143	968	-2.58673	64.3184	83.6649	0	NA	NA	NA	NA	0	NA	NA	0	NA	0	1.30812	NA	NA
2021-03-18 16:10:00	OP-100m	UA-150m	MC	451.591	76.459	14.6355	3.1303	0.25473	-130.9	0.01457	3.502	2.529	1.218	4.092	0.08	3.46143	67.8308	2.81143	968	-2.58673	64.3184	83.6649	0	NA	NA	NA	NA	0	NA	NA	NA	1.44551e-06	491227	NA	NA	NA
2021-03-18 16:10:00	OP-150m	UA-150m	MC	451.591	76.459	14.6355	3.1303	0.25473	-130.9	0.01457	3.502	2.529	1.218	4.092	0.08	3.46143	67.8308	2.81143	968	-2.58673	64.3184	83.6649	0	NA	NA	NA	NA	0	NA	NA	NA	4.38463e-07	40949	NA	NA	NA
2021-03-18 16:10:00	OP-200m	UA-150m	MC	451.591	76.459	14.6355	3.1303	0.25473	-130.9	0.01457	3.502	2.529	1.218	4.092	0.08	3.46143	67.8308	2.81143	968	-2.58673	64.3184	83.6649	0	NA	NA	NA	NA	0	NA	NA	NA	8.84252e-08	4493	NA	NA	NA
2021-03-18 16:10:00	OP-50m	UA-150m	MC	451.591	76.459	14.6355	3.1303	0.25473	-130.9	0.01457	3.502	2.529	1.218	4.092	0.08	3.46143	67.8308	2.81143	968	-2.58673	64.3184	83.6649	0	NA	NA	NA	NA	0	NA	NA	0.000522879	4.48366e-06	3225930	1.30582	-0.0158517	NA
2021-03-18 16:10:00	OP-UW	UA-150m	MC	451.591	76.459	14.6355	3.1303	0.25473	-130.9	0.01457	3.502	2.529	1.218	4.092	0.08	3.46143	67.8308	2.81143	968	-2.58673	64.3184	83.6649	0	NA	NA	NA	NA	0	NA	NA	0	NA	0	1.30812	NA	NA
2021-03-18 16:20:00	OP-100m	UA-UW	MC	451.591	63.835	12.0998	2.94869	0.219286	-47.1	0.008097	3.29	2.878	1.288	4.322	0.2	3.59469	60.6858	3.05592	967.913	-3.60407	58.8603	108.002	0	NA	NA	NA	NA	0	NA	NA	0.000333334	3.82475e-06	1808757	NA	NA	NA
2021-03-18 16:20:00	OP-150m	UA-UW	MC	451.591	63.835	12.0998	2.94869	0.219286	-47.1	0.008097	3.29	2.878	1.288	4.322	0.2	3.59469	60.6858	3.05592	967.913	-3.60407	58.8603	108.002	0	NA	NA	NA	NA	0	NA	NA	0.000137247	2.46966e-06	752547	NA	NA	NA
2021-03-18 16:20:00	OP-200m	UA-UW	MC	451.591	63.835	12.0998	2.94869	0.219286	-47.1	0.008097	3.29	2.878	1.288	4.322	0.2	3.59469	60.6858	3.05592	967.913	-3.60407	58.8603	108.002	0	NA	NA	NA	NA	0	NA	NA	NA	2.18242e-06	285364	NA	NA	NA
2021-03-18 16:20:00	OP-50m	UA-UW	MC	451.591	63.835	12.0998	2.94869	0.219286	-47.1	0.008097	3.29	2.878	1.288	4.322	0.2	3.59469	60.6858	3.05592	967.913	-3.60407	58.8603	108.002	0	NA	NA	NA	NA	0	NA	NA	0.000636081	5.43397e-06	3463370	1.29497	-0.0319736	NA
2021-03-18 16:20:00	OP-UW	UA-UW	MC	451.591	63.835	12.0998	2.94869	0.219286	-47.1	0.008097	3.29	2.878	1.288	4.322	0.2	3.59469	60.6858	3.05592	967.913	-3.60407	58.8603	108.002	0	NA	NA	NA	NA	0	NA	NA	0	NA	0	1.30062	NA	NA
2021-03-18 16:20:00	OP-100m	UA-100m	MC	451.591	55.708	15.5866	3.0187	0.260046	-118.5	0.01902	2.618	2.527	1.061	3.349	0.08	3.59469	60.6858	3.05592	967.913	-3.60407	58.8603	108.002	0	NA	NA	NA	NA	0	NA	NA	0.000393762	4.33149e-06	2130607	NA	NA	NA
2021-03-18 16:20:00	OP-150m	UA-100m	MC	451.591	55.708	15.5866	3.0187	0.260046	-118.5	0.01902	2.618	2.527	1.061	3.349	0.08	3.59469	60.6858	3.05592	967.913	-3.60407	58.8603	108.002	0	NA	NA	NA	NA	0	NA	NA	0.00026965	3.44272e-06	1452578	NA	NA	NA
2021-03-18 16:20:00	OP-200m	UA-100m	MC	451.591	55.708	15.5866	3.0187	0.260046	-118.5	0.01902	2.618	2.527	1.061	3.349	0.08	3.59469	60.6858	3.05592	967.913	-3.60407	58.8603	108.002	0	NA	NA	NA	NA	0	NA	NA	0.000167629	2.63475e-06	917630	NA	NA	NA
2021-03-18 16:20:00	OP-50m	UA-100m	MC	451.591	55.708	15.5866	3.0187	0.260046	-118.5	0.01902	2.618	2.527	1.061	3.349	0.08	3.59469	60.6858	3.05592	967.913	-3.60407	58.8603	108.002	0	NA	NA	NA	NA	0	NA	NA	0.000651847	5.32045e-06	3537681	1.29497	-0.0312002	NA
2021-03-18 16:20:00	OP-UW	UA-100m	MC	451.591	55.708	15.5866	3.0187	0.260046	-118.5	0.01902	2.618	2.527	1.061	3.349	0.08	3.59469	60.6858	3.05592	967.913	-3.60407	58.8603	108.002	0	NA	NA	NA	NA	0	NA	NA	0	NA	0	1.30062	NA	NA
2021-03-18 16:20:00	OP-100m	UA-150m	MC	451.591	67.241	11.9004	3.15295	0.265088	-222.1	0.01745	2.641	2.179	1.111	3.589	0.08	3.59469	60.6858	3.05592	967.913	-3.60407	58.8603	108.002	0	NA	NA	NA	NA	0	NA	NA	0.000280985	3.20113e-06	1684380	NA	NA	NA
2021-03-18 16:20:00	OP-150m	UA-150m	MC	451.591	67.241	11.9004	3.15295	0.265088	-222.1	0.01745	2.641	2.179	1.111	3.589	0.08	3.59469	60.6858	3.05592	967.913	-3.60407	58.8603	108.002	0	NA	NA	NA	NA	0	NA	NA	NA	1.39001e-06	400551	NA	NA	NA
2021-03-18 16:20:00	OP-200m	UA-150m	MC	451.591	67.241	11.9004	3.15295	0.265088	-222.1	0.01745	2.641	2.179	1.111	3.589	0.08	3.59469	60.6858	3.05592	967.913	-3.60407	58.8603	108.002	0	NA	NA	NA	NA	0	NA	NA	NA	5.7329e-07	74079	NA	NA	NA
2021-03-18 16:20:00	OP-50m	UA-150m	MC	451.591	67.241	11.9004	3.15295	0.265088	-222.1	0.01745	2.641	2.179	1.111	3.589	0.08	3.59469	60.6858	3.05592	967.913	-3.60407	58.8603	108.002	0	NA	NA	NA	NA	0	NA	NA	0.00062873	5.02017e-06	3654502	1.29497	-0.0323474	NA
2021-03-18 16:20:00	OP-UW	UA-150m	MC	451.591	67.241	11.9004	3.15295	0.265088	-222.1	0.01745	2.641	2.179	1.111	3.589	0.08	3.59469	60.6858	3.05592	967.913	-3.60407	58.8603	108.002	0	NA	NA	NA	NA	0	NA	NA	0	NA	0	1.30062	NA	NA
2021-03-18 16:30:00	OP-100m	UA-UW	MC	451.591	48.808	15.5153	1.93595	0.174206	-28.8	0.01921	2.876	2.509	1.441	5.138	0.2	3.60735	55.5617	2.78715	967.813	-3.7898	58.4745	111.453	0	NA	NA	NA	NA	0	NA	NA	0.000405144	4.63287e-06	1906928	NA	NA	NA
2021-03-18 16:30:00	OP-150m	UA-UW	MC	451.591	48.808	15.5153	1.93595	0.174206	-28.8	0.01921	2.876	2.509	1.441	5.138	0.2	3.60735	55.5617	2.78715	967.813	-3.7898	58.4745	111.453	0	NA	NA	NA	NA	0	NA	NA	0.000274865	3.81084e-06	1286744	1.29376	-0.201774	NA
2021-03-18 16:30:00	OP-200m	UA-UW	MC	451.591	48.808	15.5153	1.93595	0.174206	-28.8	0.01921	2.876	2.509	1.441	5.138	0.2	3.60735	55.5617	2.78715	967.813	-3.7898	58.4745	111.453	0	NA	NA	NA	NA	0	NA	NA	0.00019335	2.98741e-06	914355	NA	NA	NA
2021-03-18 16:30:00	OP-50m	UA-UW	MC	451.591	48.808	15.5153	1.93595	0.174206	-28.8	0.01921	2.876	2.509	1.441	5.138	0.2	3.60735	55.5617	2.78715	967.813	-3.7898	58.4745	111.453	0	NA	NA	NA	NA	0	NA	NA	0.000703737	5.87693e-06	3302410	1.29354	-0.0799248	NA
2021-03-18 16:30:00	OP-UW	UA-UW	MC	451.591	48.808	15.5153	1.93595	0.174206	-28.8	0.01921	2.876	2.509	1.441	5.138	0.2	3.60735	55.5617	2.78715	967.813	-3.7898	58.4745	111.453	0	NA	NA	NA	NA	0	NA	NA	0	NA	0	1.30916	NA	NA
2021-03-18 16:30:00	OP-100m	UA-100m	MC	451.591	45.206	13.7372	2.2737	0.184424	-148.7	0.01441	3.094	2.911	1.391	5.298	0.08	3.60735	55.5617	2.78715	967.813	-3.7898	58.4745	111.453	0	NA	NA	NA	NA	0	NA	NA	0.000458351	6.30548e-06	2298692	NA	NA	NA
2021-03-18 16:30:00	OP-150m	UA-100m	MC	451.591	45.206	13.7372	2.2737	0.184424	-148.7	0.01441	3.094	2.911	1.391	5.298	0.08	3.60735	55.5617	2.78715	967.813	-3.7898	58.4745	111.453	0	NA	NA	NA	NA	0	NA	NA	0.000324562	3.95369e-06	1639230	1.29376	-0.170879	NA
2021-03-18 16:30:00	OP-200m	UA-100m	MC	451.591	45.206	13.7372	2.2737	0.184424	-148.7	0.01441	3.094	2.911	1.391	5.298	0.08	3.60735	55.5617	2.78715	967.813	-3.7898	58.4745	111.453	0	NA	NA	NA	NA	0	NA	NA	0.000242346	3.36833e-06	1230733	NA	NA	NA
2021-03-18 16:30:00	OP-50m	UA-100m	MC	451.591	45.206	13.7372	2.2737	0.184424	-148.7	0.01441	3.094	2.911	1.391	5.298	0.08	3.60735	55.5617	2.78715	967.813	-3.7898	58.4745	111.453	0	NA	NA	NA	NA	0	NA	NA	0.000719883	5.89119e-06	3642275	1.29354	-0.0781322	NA
2021-03-18 16:30:00	OP-UW	UA-100m	MC	451.591	45.206	13.7372	2.2737	0.184424	-148.7	0.01441	3.094	2.911	1.391	5.298	0.08	3.60735	55.5617	2.78715	967.813	-3.7898	58.4745	111.453	0	NA	NA	NA	NA	0	NA	NA	0	NA	0	1.30916	NA	NA
2021-03-18 16:30:00	OP-100m	UA-150m	MC	451.591	47.288	13.5051	2.37427	0.20494	-1691.3	0.02036	2.486	2.609	1.251	4.399	0.08	3.60735	55.5617	2.78715	967.813	-3.7898	58.4745	111.453	0	NA	NA	NA	NA	0	NA	NA	0.000450842	4.61511e-06	2309737	NA	NA	NA
2021-03-18 16:30:00	OP-150m	UA-150m	MC	451.591	47.288	13.5051	2.37427	0.20494	-1691.3	0.02036	2.486	2.609	1.251	4.399	0.08	3.60735	55.5617	2.78715	967.813	-3.7898	58.4745	111.453	0	NA	NA	NA	NA	0	NA	NA	0.00033105	5.14259e-06	1686876	1.29376	-0.16753	NA
2021-03-18 16:30:00	OP-200m	UA-150m	MC	451.591	47.288	13.5051	2.37427	0.20494	-1691.3	0.02036	2.486	2.609	1.251	4.399	0.08	3.60735	55.5617	2.78715	967.813	-3.7898	58.4745	111.453	0	NA	NA	NA	NA	0	NA	NA	0.00024755	3.16667e-06	1286875	NA	NA	NA
2021-03-18 16:30:00	OP-50m	UA-150m	MC	451.591	47.288	13.5051	2.37427	0.20494	-1691.3	0.02036	2.486	2.609	1.251	4.399	0.08	3.60735	55.5617	2.78715	967.813	-3.7898	58.4745	111.453	0	NA	NA	NA	NA	0	NA	NA	0.000731713	5.8116e-06	3734865	1.29354	-0.076869	NA
2021-03-18 16:30:00	OP-UW	UA-150m	MC	451.591	47.288	13.5051	2.37427	0.20494	-1691.3	0.02036	2.486	2.609	1.251	4.399	0.08	3.60735	55.5617	2.78715	967.813	-3.7898	58.4745	111.453	0	NA	NA	NA	NA	0	NA	NA	0	NA	0	1.30916	NA	NA
2021-03-18 16:40:00	OP-100m	UA-UW	MC	451.591	31.053	12.0735	2.44231	0.151468	-27.2	0.002547	3.685	3.194	1.63	6.713	0.2	3.64265	40.9564	2.52469	967.763	-3.3398	60.2908	124.251	0	NA	NA	NA	NA	0	NA	NA	0.000427576	5.05815e-06	1968937	NA	NA	NA
2021-03-18 16:40:00	OP-150m	UA-UW	MC	451.591	31.053	12.0735	2.44231	0.151468	-27.2	0.002547	3.685	3.194	1.63	6.713	0.2	3.64265	40.9564	2.52469	967.763	-3.3398	60.2908	124.251	0	NA	NA	NA	NA	0	NA	NA	0.000235148	3.63675e-06	1094412	1.29514	-0.369527	NA
2021-03-18 16:40:00	OP-200m	UA-UW	MC	451.591	31.053	12.0735	2.44231	0.151468	-27.2	0.002547	3.685	3.194	1.63	6.713	0.2	3.64265	40.9564	2.52469	967.763	-3.3398	60.2908	124.251	0	NA	NA	NA	NA	0	NA	NA	0.000123242	2.57497e-06	574876	1.30055	-0.546987	NA
2021-03-18 16:40:00	OP-50m	UA-UW	MC	451.591	31.053	12.0735	2.44231	0.151468	-27.2	0.002547	3.685	3.194	1.63	6.713	0.2	3.64265	40.9564	2.52469	967.763	-3.3398	60.2908	124.251	0	NA	NA	NA	NA	0	NA	NA	0.00073171	6.85802e-06	3342448	1.29577	-0.115631	NA
2021-03-18 16:40:00	OP-UW	UA-UW	MC	451.591	31.053	12.0735	2.44231	0.151468	-27.2	0.002547	3.685	3.194	1.63	6.713	0.2	3.64265	40.9564	2.52469	967.763	-3.3398	60.2908	124.251	0	NA	NA	NA	NA	0	NA	NA	0	NA	0	1.31928	NA	NA
2021-03-18 16:40:00	OP-100m	UA-100m	MC	451.591	34.912	12.2899	2.39711	0.204259	-167.3	0.01838	2.844	2.221	1.211	4.075	0.08	3.64265	40.9564	2.52469	967.763	-3.3398	60.2908	124.251	0	NA	NA	NA	NA	0	NA	NA	0.000461158	4.75175e-06	2244601	NA	NA	NA
2021-03-18 16:40:00	OP-150m	UA-100m	MC	451.591	34.912	12.2899	2.39711	0.204259	-167.3	0.01838	2.844	2.221	1.211	4.075	0.08	3.64265	40.9564	2.52469	967.763	-3.3398	60.2908	124.251	0	NA	NA	NA	NA	0	NA	NA	0.000310472	3.73755e-06	1528148	1.29514	-0.279876	NA
2021-03-18 16:40:00	OP-200m	UA-100m	MC	451.591	34.912	12.2899	2.39711	0.204259	-167.3	0.01838	2.844	2.221	1.211	4.075	0.08	3.64265	40.9564	2.52469	967.763	-3.3398	60.2908	124.251	0	NA	NA	NA	NA	0	NA	NA	0.000208569	3.19734e-06	1024872	1.30055	-0.32321	NA
2021-03-18 16:40:00	OP-50m	UA-100m	MC	451.591	34.912	12.2899	2.39711	0.204259	-167.3	0.01838	2.844	2.221	1.211	4.075	0.08	3.64265	40.9564	2.52469	967.763	-3.3398	60.2908	124.251	0	NA	NA	NA	NA	0	NA	NA	0.000739105	6.5289e-06	3600226	1.29577	-0.114474	NA
2021-03-18 16:40:00	OP-UW	UA-100m	MC	451.591	34.912	12.2899	2.39711	0.204259	-167.3	0.01838	2.844	2.221	1.211	4.075	0.08	3.64265	40.9564	2.52469	967.763	-3.3398	60.2908	124.251	0	NA	NA	NA	NA	0	NA	NA	0	NA	0	1.31928	NA	NA
2021-03-18 16:40:00	OP-100m	UA-150m	MC	451.591	36.952	11.7772	2.49477	0.222294	-1042.2	0.02348	2.721	1.842	1.094	3.549	0.08	3.64265	40.9564	2.52469	967.763	-3.3398	60.2908	124.251	0	NA	NA	NA	NA	0	NA	NA	0.000479745	5.07794e-06	2298646	NA	NA	NA
2021-03-18 16:40:00	OP-150m	UA-150m	MC	451.591	36.952	11.7772	2.49477	0.222294	-1042.2	0.02348	2.721	1.842	1.094	3.549	0.08	3.64265	40.9564	2.52469	967.763	-3.3398	60.2908	124.251	0	NA	NA	NA	NA	0	NA	NA	0.000354912	5.90853e-06	1673806	1.29514	-0.244831	NA
2021-03-18 16:40:00	OP-200m	UA-150m	MC	451.591	36.952	11.7772	2.49477	0.222294	-1042.2	0.02348	2.721	1.842	1.094	3.549	0.08	3.64265	40.9564	2.52469	967.763	-3.3398	60.2908	124.251	0	NA	NA	NA	NA	0	NA	NA	0.000254947	3.4323e-06	1235722	1.30055	-0.264414	NA
2021-03-18 16:40:00	OP-50m	UA-150m	MC	451.591	36.952	11.7772	2.49477	0.222294	-1042.2	0.02348	2.721	1.842	1.094	3.549	0.08	3.64265	40.9564	2.52469	967.763	-3.3398	60.2908	124.251	0	NA	NA	NA	NA	0	NA	NA	0.000754611	6.33423e-06	3651529	1.29577	-0.112122	NA
2021-03-18 16:40:00	OP-UW	UA-150m	MC	451.591	36.952	11.7772	2.49477	0.222294	-1042.2	0.02348	2.721	1.842	1.094	3.549	0.08	3.64265	40.9564	2.52469	967.763	-3.3398	60.2908	124.251	0	NA	NA	NA	NA	0	NA	NA	0	NA	0	1.31928	NA	NA
2021-03-18 16:50:00	OP-100m	UA-UW	MC	451.591	37.541	14.7085	1.53158	0.182778	-21.1	0.05445	2.169	1.73	1.104	3.249	0.2	3.67612	35.1267	2.4696	967.577	-3.38673	59.799	191.883	0	NA	NA	NA	NA	0	NA	NA	0.000453318	5.09081e-06	1682987	1.3058	-0.117943	NA
2021-03-18 16:50:00	OP-150m	UA-UW	MC	451.591	37.541	14.7085	1.53158	0.182778	-21.1	0.05445	2.169	1.73	1.104	3.249	0.2	3.67612	35.1267	2.4696	967.577	-3.38673	59.799	191.883	0	NA	NA	NA	NA	0	NA	NA	0.000303559	4.26382e-06	1118145	1.29498	-0.30448	NA
2021-03-18 16:50:00	OP-200m	UA-UW	MC	451.591	37.541	14.7085	1.53158	0.182778	-21.1	0.05445	2.169	1.73	1.104	3.249	0.2	3.67612	35.1267	2.4696	967.577	-3.38673	59.799	191.883	0	NA	NA	NA	NA	0	NA	NA	0.000208233	3.39368e-06	777034	1.30083	-0.342736	NA
2021-03-18 16:50:00	OP-50m	UA-UW	MC	451.591	37.541	14.7085	1.53158	0.182778	-21.1	0.05445	2.169	1.73	1.104	3.249	0.2	3.67612	35.1267	2.4696	967.577	-3.38673	59.799	191.883	0	NA	NA	NA	NA	0	NA	NA	0.000814455	6.92556e-06	3017243	1.31124	-0.0416399	NA
2021-03-18 16:50:00	OP-UW	UA-UW	MC	451.591	37.541	14.7085	1.53158	0.182778	-21.1	0.05445	2.169	1.73	1.104	3.249	0.2	3.67612	35.1267	2.4696	967.577	-3.38673	59.799	191.883	0	NA	NA	NA	NA	0	NA	NA	0	NA	0	1.32066	NA	NA
2021-03-18 16:50:00	OP-100m	UA-100m	MC	451.591	39.401	12.1362	1.8423	0.186449	-26.7	0.0321	2.309	1.943	1.186	3.607	0.08	3.67612	35.1267	2.4696	967.577	-3.38673	59.799	191.883	0	NA	NA	NA	NA	0	NA	NA	0.000446731	4.9995e-06	1846000	1.3058	-0.119683	NA
2021-03-18 16:50:00	OP-150m	UA-100m	MC	451.591	39.401	12.1362	1.8423	0.186449	-26.7	0.0321	2.309	1.943	1.186	3.607	0.08	3.67612	35.1267	2.4696	967.577	-3.38673	59.799	191.883	0	NA	NA	NA	NA	0	NA	NA	0.000306954	4.07326e-06	1257966	1.29498	-0.301112	NA
2021-03-18 16:50:00	OP-200m	UA-100m	MC	451.591	39.401	12.1362	1.8423	0.186449	-26.7	0.0321	2.309	1.943	1.186	3.607	0.08	3.67612	35.1267	2.4696	967.577	-3.38673	59.799	191.883	0	NA	NA	NA	NA	0	NA	NA	0.000214538	3.32333e-06	892996	1.30083	-0.332665	NA
2021-03-18 16:50:00	OP-50m	UA-100m	MC	451.591	39.401	12.1362	1.8423	0.186449	-26.7	0.0321	2.309	1.943	1.186	3.607	0.08	3.67612	35.1267	2.4696	967.577	-3.38673	59.799	191.883	0	NA	NA	NA	NA	0	NA	NA	0.00077794	6.44445e-06	3193730	1.31124	-0.0435945	NA
2021-03-18 16:50:00	OP-UW	UA-100m	MC	451.591	39.401	12.1362	1.8423	0.186449	-26.7	0.0321	2.309	1.943	1.186	3.607	0.08	3.67612	35.1267	2.4696	967.577	-3.38673	59.799	191.883	0	NA	NA	NA	NA	0	NA	NA	0	NA	0	1.32066	NA	NA
2021-03-18 16:50:00	OP-100m	UA-150m	MC	451.591	39.653	11.4899	1.93021	0.196683	-29	0.03345	2.152	1.735	1.063	3.184	0.08	3.67612	35.1267	2.4696	967.577	-3.38673	59.799	191.883	0	NA	NA	NA	NA	0	NA	NA	0.000481728	5.39911e-06	1877417	1.3058	-0.110988	NA
2021-03-18 16:50:00	OP-150m	UA-150m	MC	451.591	39.653	11.4899	1.93021	0.196683	-29	0.03345	2.152	1.735	1.063	3.184	0.08	3.67612	35.1267	2.4696	967.577	-3.38673	59.799	191.883	0	NA	NA	NA	NA	0	NA	NA	0.000332051	4.50226e-06	1287517	1.29498	-0.278353	NA
2021-03-18 16:50:00	OP-200m	UA-150m	MC	451.591	39.653	11.4899	1.93021	0.196683	-29	0.03345	2.152	1.735	1.063	3.184	0.08	3.67612	35.1267	2.4696	967.577	-3.38673	59.799	191.883	0	NA	NA	NA	NA	0	NA	NA	0.000240571	3.78919e-06	944081	1.30083	-0.296666	NA
2021-03-18 16:50:00	OP-50m	UA-150m	MC	451.591	39.653	11.4899	1.93021	0.196683	-29	0.03345	2.152	1.735	1.063	3.184	0.08	3.67612	35.1267	2.4696	967.577	-3.38673	59.799	191.883	0	NA	NA	NA	NA	0	NA	NA	0.000819185	7.33443e-06	3167100	1.31124	-0.0413995	NA
2021-03-18 16:50:00	OP-UW	UA-150m	MC	451.591	39.653	11.4899	1.93021	0.196683	-29	0.03345	2.152	1.735	1.063	3.184	0.08	3.67612	35.1267	2.4696	967.577	-3.38673	59.799	191.883	0	NA	NA	NA	NA	0	NA	NA	0	NA	0	1.32066	NA	NA
2021-03-18 17:00:00	OP-100m	UA-UW	MC	451.591	40.316	25.4746	1.46329	0.120406	-7.1	0.008852	3.155	4.71	1.58	4.647	0.2	3.96551	41.3513	1.66572	967.5	-3.52347	57.8255	230.365	0	NA	NA	NA	NA	0	NA	NA	NA	5.2019e-06	1156622	1.3085	NA	NA
2021-03-18 17:00:00	OP-150m	UA-UW	MC	451.591	40.316	25.4746	1.46329	0.120406	-7.1	0.008852	3.155	4.71	1.58	4.647	0.2	3.96551	41.3513	1.66572	967.5	-3.52347	57.8255	230.365	0	NA	NA	NA	NA	0	NA	NA	NA	4.13427e-06	655133	1.30853	NA	NA
2021-03-18 17:00:00	OP-200m	UA-UW	MC	451.591	40.316	25.4746	1.46329	0.120406	-7.1	0.008852	3.155	4.71	1.58	4.647	0.2	3.96551	41.3513	1.66572	967.5	-3.52347	57.8255	230.365	0	NA	NA	NA	NA	0	NA	NA	NA	3.45865e-06	401985	1.30617	NA	NA
2021-03-18 17:00:00	OP-50m	UA-UW	MC	451.591	40.316	25.4746	1.46329	0.120406	-7.1	0.008852	3.155	4.71	1.58	4.647	0.2	3.96551	41.3513	1.66572	967.5	-3.52347	57.8255	230.365	0	NA	NA	NA	NA	0	NA	NA	NA	8.4984e-06	2463428	1.31771	NA	NA
2021-03-18 17:00:00	OP-UW	UA-UW	MC	451.591	40.316	25.4746	1.46329	0.120406	-7.1	0.008852	3.155	4.71	1.58	4.647	0.2	3.96551	41.3513	1.66572	967.5	-3.52347	57.8255	230.365	0	NA	NA	NA	NA	0	NA	NA	NA	NA	0	1.319	NA	NA
2021-03-18 17:00:00	OP-100m	UA-100m	MC	451.591	37.552	19.0313	1.44916	0.139325	-7.8	0.01895	3.11	3.597	1.27	3.346	0.08	3.96551	41.3513	1.66572	967.5	-3.52347	57.8255	230.365	0	NA	NA	NA	NA	0	NA	NA	NA	6.44163e-06	1191759	1.3085	NA	NA
2021-03-18 17:00:00	OP-150m	UA-100m	MC	451.591	37.552	19.0313	1.44916	0.139325	-7.8	0.01895	3.11	3.597	1.27	3.346	0.08	3.96551	41.3513	1.66572	967.5	-3.52347	57.8255	230.365	0	NA	NA	NA	NA	0	NA	NA	NA	4.45242e-06	670915	1.30853	NA	NA
2021-03-18 17:00:00	OP-200m	UA-100m	MC	451.591	37.552	19.0313	1.44916	0.139325	-7.8	0.01895	3.11	3.597	1.27	3.346	0.08	3.96551	41.3513	1.66572	967.5	-3.52347	57.8255	230.365	0	NA	NA	NA	NA	0	NA	NA	NA	3.53653e-06	405347	1.30617	NA	NA
2021-03-18 17:00:00	OP-50m	UA-100m	MC	451.591	37.552	19.0313	1.44916	0.139325	-7.8	0.01895	3.11	3.597	1.27	3.346	0.08	3.96551	41.3513	1.66572	967.5	-3.52347	57.8255	230.365	0	NA	NA	NA	NA	0	NA	NA	NA	8.42923e-06	2424217	1.31771	NA	NA
2021-03-18 17:00:00	OP-UW	UA-100m	MC	451.591	37.552	19.0313	1.44916	0.139325	-7.8	0.01895	3.11	3.597	1.27	3.346	0.08	3.96551	41.3513	1.66572	967.5	-3.52347	57.8255	230.365	0	NA	NA	NA	NA	0	NA	NA	NA	NA	0	1.319	NA	NA
2021-03-18 17:00:00	OP-100m	UA-150m	MC	451.591	39.892	18.485	1.48531	0.16345	-11	0.03599	2.833	2.822	1.23	3.403	0.08	3.96551	41.3513	1.66572	967.5	-3.52347	57.8255	230.365	0	NA	NA	NA	NA	0	NA	NA	0.000397387	5.22332e-06	1372927	1.3085	-0.0951273	NA
2021-03-18 17:00:00	OP-150m	UA-150m	MC	451.591	39.892	18.485	1.48531	0.16345	-11	0.03599	2.833	2.822	1.23	3.403	0.08	3.96551	41.3513	1.66572	967.5	-3.52347	57.8255	230.365	0	NA	NA	NA	NA	0	NA	NA	0.000242862	4.09832e-06	834153	1.30853	-0.155234	NA
2021-03-18 17:00:00	OP-200m	UA-150m	MC	451.591	39.892	18.485	1.48531	0.16345	-11	0.03599	2.833	2.822	1.23	3.403	0.08	3.96551	41.3513	1.66572	967.5	-3.52347	57.8255	230.365	0	NA	NA	NA	NA	0	NA	NA	0.000158415	3.12559e-06	552193	1.30617	-0.291568	NA
2021-03-18 17:00:00	OP-50m	UA-150m	MC	451.591	39.892	18.485	1.48531	0.16345	-11	0.03599	2.833	2.822	1.23	3.403	0.08	3.96551	41.3513	1.66572	967.5	-3.52347	57.8255	230.365	0	NA	NA	NA	NA	0	NA	NA	0.000768218	7.30383e-06	2631131	1.31771	-0.00605378	NA
2021-03-18 17:00:00	OP-UW	UA-150m	MC	451.591	39.892	18.485	1.48531	0.16345	-11	0.03599	2.833	2.822	1.23	3.403	0.08	3.96551	41.3513	1.66572	967.5	-3.52347	57.8255	230.365	0	NA	NA	NA	NA	0	NA	NA	0	NA	0	1.319	NA	NA
2021-03-18 17:10:00	OP-100m	UA-UW	MC	451.591	61.744	22.06	1.61287	0.153704	-12.8	0.02067	3.034	2.936	1.169	3.291	0.2	4.06265	47.3435	1.56796	967.463	-3.84693	56.5694	165.321	0	NA	NA	NA	NA	0	NA	NA	0.000411682	5.33187e-06	1317095	1.31959	0.00143094	NA
2021-03-18 17:10:00	OP-150m	UA-UW	MC	451.591	61.744	22.06	1.61287	0.153704	-12.8	0.02067	3.034	2.936	1.169	3.291	0.2	4.06265	47.3435	1.56796	967.463	-3.84693	56.5694	165.321	0	NA	NA	NA	NA	0	NA	NA	0.000193268	3.86043e-06	613638	1.30467	-0.274939	NA
2021-03-18 17:10:00	OP-200m	UA-UW	MC	451.591	61.744	22.06	1.61287	0.153704	-12.8	0.02067	3.034	2.936	1.169	3.291	0.2	4.06265	47.3435	1.56796	967.463	-3.84693	56.5694	165.321	0	NA	NA	NA	NA	0	NA	NA	NA	2.86976e-06	316292	1.30768	NA	NA
2021-03-18 17:10:00	OP-50m	UA-UW	MC	451.591	61.744	22.06	1.61287	0.153704	-12.8	0.02067	3.034	2.936	1.169	3.291	0.2	4.06265	47.3435	1.56796	967.463	-3.84693	56.5694	165.321	0	NA	NA	NA	NA	0	NA	NA	0.000888776	8.24336e-06	2777210	1.31872	-0.00286394	NA
2021-03-18 17:10:00	OP-UW	UA-UW	MC	451.591	61.744	22.06	1.61287	0.153704	-12.8	0.02067	3.034	2.936	1.169	3.291	0.2	4.06265	47.3435	1.56796	967.463	-3.84693	56.5694	165.321	0	NA	NA	NA	NA	0	NA	NA	0	NA	0	1.31943	NA	NA
2021-03-18 17:10:00	OP-100m	UA-100m	MC	451.591	52.342	18.2614	1.5573	0.164756	-31.1	0.03912	2.545	2.859	1.228	3.851	0.08	4.06265	47.3435	1.56796	967.463	-3.84693	56.5694	165.321	0	NA	NA	NA	NA	0	NA	NA	0.000472791	5.16631e-06	1803760	1.31959	0.00124599	NA
2021-03-18 17:10:00	OP-150m	UA-100m	MC	451.591	52.342	18.2614	1.5573	0.164756	-31.1	0.03912	2.545	2.859	1.228	3.851	0.08	4.06265	47.3435	1.56796	967.463	-3.84693	56.5694	165.321	0	NA	NA	NA	NA	0	NA	NA	0.000296919	4.03875e-06	1132055	1.30467	-0.178961	NA
2021-03-18 17:10:00	OP-200m	UA-100m	MC	451.591	52.342	18.2614	1.5573	0.164756	-31.1	0.03912	2.545	2.859	1.228	3.851	0.08	4.06265	47.3435	1.56796	967.463	-3.84693	56.5694	165.321	0	NA	NA	NA	NA	0	NA	NA	0.000203608	4.44674e-06	765551	1.30768	-0.20778	NA
2021-03-18 17:10:00	OP-50m	UA-100m	MC	451.591	52.342	18.2614	1.5573	0.164756	-31.1	0.03912	2.545	2.859	1.228	3.851	0.08	4.06265	47.3435	1.56796	967.463	-3.84693	56.5694	165.321	0	NA	NA	NA	NA	0	NA	NA	0.000842363	7.20281e-06	3221640	1.31872	-0.00302174	NA
2021-03-18 17:10:00	OP-UW	UA-100m	MC	451.591	52.342	18.2614	1.5573	0.164756	-31.1	0.03912	2.545	2.859	1.228	3.851	0.08	4.06265	47.3435	1.56796	967.463	-3.84693	56.5694	165.321	0	NA	NA	NA	NA	0	NA	NA	0	NA	0	1.31943	NA	NA
2021-03-18 17:10:00	OP-100m	UA-150m	MC	451.591	53.457	16.0654	1.63808	0.151451	-41.6	0.02367	2.822	2.667	1.142	3.536	0.08	4.06265	47.3435	1.56796	967.463	-3.84693	56.5694	165.321	0	NA	NA	NA	NA	0	NA	NA	0.000600305	6.53184e-06	1976380	1.31959	0.000981324	NA
2021-03-18 17:10:00	OP-150m	UA-150m	MC	451.591	53.457	16.0654	1.63808	0.151451	-41.6	0.02367	2.822	2.667	1.142	3.536	0.08	4.06265	47.3435	1.56796	967.463	-3.84693	56.5694	165.321	0	NA	NA	NA	NA	0	NA	NA	0.000392917	5.19143e-06	1300977	1.30467	-0.135237	NA
2021-03-18 17:10:00	OP-200m	UA-150m	MC	451.591	53.457	16.0654	1.63808	0.151451	-41.6	0.02367	2.822	2.667	1.142	3.536	0.08	4.06265	47.3435	1.56796	967.463	-3.84693	56.5694	165.321	0	NA	NA	NA	NA	0	NA	NA	0.000258568	4.22961e-06	854931	1.30768	-0.163615	NA
2021-03-18 17:10:00	OP-50m	UA-150m	MC	451.591	53.457	16.0654	1.63808	0.151451	-41.6	0.02367	2.822	2.667	1.142	3.536	0.08	4.06265	47.3435	1.56796	967.463	-3.84693	56.5694	165.321	0	NA	NA	NA	NA	0	NA	NA	0.00100953	8.63007e-06	3337493	1.31872	-0.00252137	NA
2021-03-18 17:10:00	OP-UW	UA-150m	MC	451.591	53.457	16.0654	1.63808	0.151451	-41.6	0.02367	2.822	2.667	1.142	3.536	0.08	4.06265	47.3435	1.56796	967.463	-3.84693	56.5694	165.321	0	NA	NA	NA	NA	0	NA	NA	0	NA	0	1.31943	NA	NA
2021-03-18 17:20:00	OP-100m	UA-100m	MC	451.591	48.061	22.2283	1.11009	0.0996121	-9.7	0.01507	3.971	4.898	1.468	4.354	0.08	4.02469	52.5764	1.37041	967.363	-3.65307	57.2602	148.968	0	NA	NA	NA	NA	0	NA	NA	NA	9.1825e-06	1198481	1.32211	NA	NA
2021-03-18 17:20:00	OP-150m	UA-100m	MC	451.591	48.061	22.2283	1.11009	0.0996121	-9.7	0.01507	3.971	4.898	1.468	4.354	0.08	4.02469	52.5764	1.37041	967.363	-3.65307	57.2602	148.968	0	NA	NA	NA	NA	0	NA	NA	NA	4.7261e-06	652242	1.29701	NA	NA
2021-03-18 17:20:00	OP-200m	UA-100m	MC	451.591	48.061	22.2283	1.11009	0.0996121	-9.7	0.01507	3.971	4.898	1.468	4.354	0.08	4.02469	52.5764	1.37041	967.363	-3.65307	57.2602	148.968	0	NA	NA	NA	NA	0	NA	NA	NA	3.79078e-06	398711	1.30355	NA	NA
2021-03-18 17:20:00	OP-50m	UA-100m	MC	451.591	48.061	22.2283	1.11009	0.0996121	-9.7	0.01507	3.971	4.898	1.468	4.354	0.08	4.02469	52.5764	1.37041	967.363	-3.65307	57.2602	148.968	0	NA	NA	NA	NA	0	NA	NA	NA	1.04959e-05	2546832	1.32284	NA	NA
2021-03-18 17:20:00	OP-UW	UA-100m	MC	451.591	48.061	22.2283	1.11009	0.0996121	-9.7	0.01507	3.971	4.898	1.468	4.354	0.08	4.02469	52.5764	1.37041	967.363	-3.65307	57.2602	148.968	0	NA	NA	NA	NA	0	NA	NA	NA	NA	0	1.31562	NA	NA
2021-03-18 17:20:00	OP-100m	UA-150m	MC	451.591	51.282	22.8377	1.12585	0.106161	-10.9	0.01945	3.604	4.655	1.354	3.893	0.08	4.02469	52.5764	1.37041	967.363	-3.65307	57.2602	148.968	0	NA	NA	NA	NA	0	NA	NA	NA	7.46128e-06	1217445	1.32211	NA	NA
2021-03-18 17:20:00	OP-150m	UA-150m	MC	451.591	51.282	22.8377	1.12585	0.106161	-10.9	0.01945	3.604	4.655	1.354	3.893	0.08	4.02469	52.5764	1.37041	967.363	-3.65307	57.2602	148.968	0	NA	NA	NA	NA	0	NA	NA	NA	5.13846e-06	665572	1.29701	NA	NA
2021-03-18 17:20:00	OP-200m	UA-150m	MC	451.591	51.282	22.8377	1.12585	0.106161	-10.9	0.01945	3.604	4.655	1.354	3.893	0.08	4.02469	52.5764	1.37041	967.363	-3.65307	57.2602	148.968	0	NA	NA	NA	NA	0	NA	NA	NA	3.85518e-06	417137	1.30355	NA	NA
2021-03-18 17:20:00	OP-50m	UA-150m	MC	451.591	51.282	22.8377	1.12585	0.106161	-10.9	0.01945	3.604	4.655	1.354	3.893	0.08	4.02469	52.5764	1.37041	967.363	-3.65307	57.2602	148.968	0	NA	NA	NA	NA	0	NA	NA	NA	1.01602e-05	2560303	1.32284	NA	NA
2021-03-18 17:20:00	OP-UW	UA-150m	MC	451.591	51.282	22.8377	1.12585	0.106161	-10.9	0.01945	3.604	4.655	1.354	3.893	0.08	4.02469	52.5764	1.37041	967.363	-3.65307	57.2602	148.968	0	NA	NA	NA	NA	0	NA	NA	NA	NA	0	1.31562	NA	NA
2021-03-18 17:30:00	OP-100m	UA-UW	MC	451.591	25.292	32.88	1.12266	0.1309	-8.7	0.04009	3.329	4.085	1.366	3.799	0.2	4.17081	41.8937	1.15735	967.3	-3.62653	56.9439	178.358	0	NA	NA	NA	NA	0	NA	NA	NA	6.24765e-06	778810	1.31942	NA	NA
2021-03-18 17:30:00	OP-150m	UA-UW	MC	451.591	25.292	32.88	1.12266	0.1309	-8.7	0.04009	3.329	4.085	1.366	3.799	0.2	4.17081	41.8937	1.15735	967.3	-3.62653	56.9439	178.358	0	NA	NA	NA	NA	0	NA	NA	NA	3.1488e-06	360343	1.29423	NA	NA
2021-03-18 17:30:00	OP-200m	UA-UW	MC	451.591	25.292	32.88	1.12266	0.1309	-8.7	0.04009	3.329	4.085	1.366	3.799	0.2	4.17081	41.8937	1.15735	967.3	-3.62653	56.9439	178.358	0	NA	NA	NA	NA	0	NA	NA	NA	2.01948e-06	203866	1.30548	NA	NA
2021-03-18 17:30:00	OP-50m	UA-UW	MC	451.591	25.292	32.88	1.12266	0.1309	-8.7	0.04009	3.329	4.085	1.366	3.799	0.2	4.17081	41.8937	1.15735	967.3	-3.62653	56.9439	178.358	0	NA	NA	NA	NA	0	NA	NA	NA	9.24143e-06	2031865	1.32501	NA	NA
2021-03-18 17:30:00	OP-UW	UA-UW	MC	451.591	25.292	32.88	1.12266	0.1309	-8.7	0.04009	3.329	4.085	1.366	3.799	0.2	4.17081	41.8937	1.15735	967.3	-3.62653	56.9439	178.358	0	NA	NA	NA	NA	0	NA	NA	NA	NA	0	1.31785	NA	NA
2021-03-18 17:30:00	OP-100m	UA-150m	MC	451.591	37.211	21.11	1.22809	0.10065	-7.7	0.00919	4.089	4.435	1.609	4.877	0.08	4.17081	41.8937	1.15735	967.3	-3.62653	56.9439	178.358	0	NA	NA	NA	NA	0	NA	NA	NA	6.2405e-06	1194784	1.31942	NA	NA
2021-03-18 17:30:00	OP-150m	UA-150m	MC	451.591	37.211	21.11	1.22809	0.10065	-7.7	0.00919	4.089	4.435	1.609	4.877	0.08	4.17081	41.8937	1.15735	967.3	-3.62653	56.9439	178.358	0	NA	NA	NA	NA	0	NA	NA	NA	4.95635e-06	650555	1.29423	NA	NA
2021-03-18 17:30:00	OP-200m	UA-150m	MC	451.591	37.211	21.11	1.22809	0.10065	-7.7	0.00919	4.089	4.435	1.609	4.877	0.08	4.17081	41.8937	1.15735	967.3	-3.62653	56.9439	178.358	0	NA	NA	NA	NA	0	NA	NA	NA	3.81059e-06	405482	1.30548	NA	NA
2021-03-18 17:30:00	OP-50m	UA-150m	MC	451.591	37.211	21.11	1.22809	0.10065	-7.7	0.00919	4.089	4.435	1.609	4.877	0.08	4.17081	41.8937	1.15735	967.3	-3.62653	56.9439	178.358	0	NA	NA	NA	NA	0	NA	NA	NA	9.56293e-06	2440825	1.32501	NA	NA
2021-03-18 17:30:00	OP-UW	UA-150m	MC	451.591	37.211	21.11	1.22809	0.10065	-7.7	0.00919	4.089	4.435	1.609	4.877	0.08	4.17081	41.8937	1.15735	967.3	-3.62653	56.9439	178.358	0	NA	NA	NA	NA	0	NA	NA	NA	NA	0	1.31785	NA	NA
2021-03-18 17:40:00	OP-100m	UA-UW	MC	451.591	82.5	14.0534	3.79318	0.190273	-15.7	0.0004758	3.901	4.439	1.757	7.267	0.2	4.22715	64.0043	2.58363	967.337	-2.69594	61.9386	169.96	0	NA	NA	NA	NA	0	NA	NA	NA	1.03293e-06	185699	1.32264	NA	NA
2021-03-18 17:40:00	OP-150m	UA-UW	MC	451.591	82.5	14.0534	3.79318	0.190273	-15.7	0.0004758	3.901	4.439	1.757	7.267	0.2	4.22715	64.0043	2.58363	967.337	-2.69594	61.9386	169.96	0	NA	NA	NA	NA	0	NA	NA	NA	4.03246e-07	18092	1.29854	NA	NA
2021-03-18 17:40:00	OP-200m	UA-UW	MC	451.591	82.5	14.0534	3.79318	0.190273	-15.7	0.0004758	3.901	4.439	1.757	7.267	0.2	4.22715	64.0043	2.58363	967.337	-2.69594	61.9386	169.96	0	NA	NA	NA	NA	0	NA	NA	NA	1.16454e-07	2331	1.30382	NA	NA
2021-03-18 17:40:00	OP-50m	UA-UW	MC	451.591	82.5	14.0534	3.79318	0.190273	-15.7	0.0004758	3.901	4.439	1.757	7.267	0.2	4.22715	64.0043	2.58363	967.337	-2.69594	61.9386	169.96	0	NA	NA	NA	NA	0	NA	NA	0.000330843	4.03577e-06	2006273	1.3267	0.0823286	NA
2021-03-18 17:40:00	OP-UW	UA-UW	MC	451.591	82.5	14.0534	3.79318	0.190273	-15.7	0.0004758	3.901	4.439	1.757	7.267	0.2	4.22715	64.0043	2.58363	967.337	-2.69594	61.9386	169.96	0	NA	NA	NA	NA	0	NA	NA	0	NA	0	1.31913	NA	NA
2021-03-18 17:40:00	OP-100m	UA-100m	MC	451.591	82.661	20.0227	3.79185	0.290631	-69.5	0.01026	3.484	3.638	1.16	3.71	0.08	4.22715	64.0043	2.58363	967.337	-2.69594	61.9386	169.96	0	NA	NA	NA	NA	0	NA	NA	NA	1.22853e-06	351035	1.32264	NA	NA
2021-03-18 17:40:00	OP-150m	UA-100m	MC	451.591	82.661	20.0227	3.79185	0.290631	-69.5	0.01026	3.484	3.638	1.16	3.71	0.08	4.22715	64.0043	2.58363	967.337	-2.69594	61.9386	169.96	0	NA	NA	NA	NA	0	NA	NA	NA	6.9338e-07	65113	1.29854	NA	NA
2021-03-18 17:40:00	OP-200m	UA-100m	MC	451.591	82.661	20.0227	3.79185	0.290631	-69.5	0.01026	3.484	3.638	1.16	3.71	0.08	4.22715	64.0043	2.58363	967.337	-2.69594	61.9386	169.96	0	NA	NA	NA	NA	0	NA	NA	NA	2.8794e-07	15987	1.30382	NA	NA
2021-03-18 17:40:00	OP-50m	UA-100m	MC	451.591	82.661	20.0227	3.79185	0.290631	-69.5	0.01026	3.484	3.638	1.16	3.71	0.08	4.22715	64.0043	2.58363	967.337	-2.69594	61.9386	169.96	0	NA	NA	NA	NA	0	NA	NA	0.000322262	3.37009e-06	2149350	1.3267	0.0845207	NA
2021-03-18 17:40:00	OP-UW	UA-100m	MC	451.591	82.661	20.0227	3.79185	0.290631	-69.5	0.01026	3.484	3.638	1.16	3.71	0.08	4.22715	64.0043	2.58363	967.337	-2.69594	61.9386	169.96	0	NA	NA	NA	NA	0	NA	NA	0	NA	0	1.31913	NA	NA
2021-03-18 17:40:00	OP-100m	UA-150m	MC	451.591	81.487	19.5069	3.90751	0.251951	-38.4	0.003558	4	4.081	1.442	5.29	0.08	4.22715	64.0043	2.58363	967.337	-2.69594	61.9386	169.96	0	NA	NA	NA	NA	0	NA	NA	NA	1.21673e-06	340186	1.32264	NA	NA
2021-03-18 17:40:00	OP-150m	UA-150m	MC	451.591	81.487	19.5069	3.90751	0.251951	-38.4	0.003558	4	4.081	1.442	5.29	0.08	4.22715	64.0043	2.58363	967.337	-2.69594	61.9386	169.96	0	NA	NA	NA	NA	0	NA	NA	NA	4.96491e-07	62394	1.29854	NA	NA
2021-03-18 17:40:00	OP-200m	UA-150m	MC	451.591	81.487	19.5069	3.90751	0.251951	-38.4	0.003558	4	4.081	1.442	5.29	0.08	4.22715	64.0043	2.58363	967.337	-2.69594	61.9386	169.96	0	NA	NA	NA	NA	0	NA	NA	NA	3.02398e-07	14077	1.30382	NA	NA
2021-03-18 17:40:00	OP-50m	UA-150m	MC	451.591	81.487	19.5069	3.90751	0.251951	-38.4	0.003558	4	4.081	1.442	5.29	0.08	4.22715	64.0043	2.58363	967.337	-2.69594	61.9386	169.96	0	NA	NA	NA	NA	0	NA	NA	0.000322882	3.53239e-06	2243284	1.3267	0.0843584	NA
2021-03-18 17:40:00	OP-UW	UA-150m	MC	451.591	81.487	19.5069	3.90751	0.251951	-38.4	0.003558	4	4.081	1.442	5.29	0.08	4.22715	64.0043	2.58363	967.337	-2.69594	61.9386	169.96	0	NA	NA	NA	NA	0	NA	NA	0	NA	0	1.31913	NA	NA
2021-03-18 17:50:00	OP-100m	UA-UW	MC	451.591	82.02	17.2077	4.13029	0.210541	-27	0.0006174	3.617	4.195	1.602	6.436	0.2	3.19859	89.4283	3.96469	967.487	-2.17653	68.753	94.2932	0	NA	NA	NA	NA	0	NA	NA	NA	1.05011e-06	202829	1.32329	NA	NA
2021-03-18 17:50:00	OP-150m	UA-UW	MC	451.591	82.02	17.2077	4.13029	0.210541	-27	0.0006174	3.617	4.195	1.602	6.436	0.2	3.19859	89.4283	3.96469	967.487	-2.17653	68.753	94.2932	0	NA	NA	NA	NA	0	NA	NA	NA	3.39405e-07	19628	1.29862	NA	NA
2021-03-18 17:50:00	OP-200m	UA-UW	MC	451.591	82.02	17.2077	4.13029	0.210541	-27	0.0006174	3.617	4.195	1.602	6.436	0.2	3.19859	89.4283	3.96469	967.487	-2.17653	68.753	94.2932	0	NA	NA	NA	NA	0	NA	NA	NA	1.28996e-07	3662	1.30781	NA	NA
2021-03-18 17:50:00	OP-50m	UA-UW	MC	451.591	82.02	17.2077	4.13029	0.210541	-27	0.0006174	3.617	4.195	1.602	6.436	0.2	3.19859	89.4283	3.96469	967.487	-2.17653	68.753	94.2932	0	NA	NA	NA	NA	0	NA	NA	0.000348198	9.05936e-06	2184075	1.31483	-0.000381591	NA
2021-03-18 17:50:00	OP-UW	UA-UW	MC	451.591	82.02	17.2077	4.13029	0.210541	-27	0.0006174	3.617	4.195	1.602	6.436	0.2	3.19859	89.4283	3.96469	967.487	-2.17653	68.753	94.2932	0	NA	NA	NA	NA	0	NA	NA	0	NA	0	1.31487	NA	NA
2021-03-18 17:50:00	OP-100m	UA-100m	MC	451.591	86.129	16.2582	4.13443	0.267271	-97.6	0.003988	3.069	2.681	1.208	4.001	0.08	3.19859	89.4283	3.96469	967.487	-2.17653	68.753	94.2932	0	NA	NA	NA	NA	0	NA	NA	NA	4.89861e-07	32793	1.32329	NA	NA
2021-03-18 17:50:00	OP-150m	UA-100m	MC	451.591	86.129	16.2582	4.13443	0.267271	-97.6	0.003988	3.069	2.681	1.208	4.001	0.08	3.19859	89.4283	3.96469	967.487	-2.17653	68.753	94.2932	0	NA	NA	NA	NA	0	NA	NA	NA	2.17726e-08	522	1.29862	NA	NA
2021-03-18 17:50:00	OP-200m	UA-100m	MC	451.591	86.129	16.2582	4.13443	0.267271	-97.6	0.003988	3.069	2.681	1.208	4.001	0.08	3.19859	89.4283	3.96469	967.487	-2.17653	68.753	94.2932	0	NA	NA	NA	NA	0	NA	NA	NA	2.12973e-09	34	1.30781	NA	NA
2021-03-18 17:50:00	OP-50m	UA-100m	MC	451.591	86.129	16.2582	4.13443	0.267271	-97.6	0.003988	3.069	2.681	1.208	4.001	0.08	3.19859	89.4283	3.96469	967.487	-2.17653	68.753	94.2932	0	NA	NA	NA	NA	0	NA	NA	0.00025765	3.02356e-06	1739369	1.31483	-0.000515697	NA
2021-03-18 17:50:00	OP-UW	UA-100m	MC	451.591	86.129	16.2582	4.13443	0.267271	-97.6	0.003988	3.069	2.681	1.208	4.001	0.08	3.19859	89.4283	3.96469	967.487	-2.17653	68.753	94.2932	0	NA	NA	NA	NA	0	NA	NA	0	NA	0	1.31487	NA	NA
2021-03-18 17:50:00	OP-100m	UA-150m	MC	451.591	86.881	16.0089	4.17991	0.314545	-294.2	0.01007	2.991	2.584	1.109	3.589	0.08	3.19859	89.4283	3.96469	967.487	-2.17653	68.753	94.2932	0	NA	NA	NA	NA	0	NA	NA	NA	2.83213e-07	32610	1.32329	NA	NA
2021-03-18 17:50:00	OP-150m	UA-150m	MC	451.591	86.881	16.0089	4.17991	0.314545	-294.2	0.01007	2.991	2.584	1.109	3.589	0.08	3.19859	89.4283	3.96469	967.487	-2.17653	68.753	94.2932	0	NA	NA	NA	NA	0	NA	NA	NA	2.48349e-08	444	1.29862	NA	NA
2021-03-18 17:50:00	OP-200m	UA-150m	MC	451.591	86.881	16.0089	4.17991	0.314545	-294.2	0.01007	2.991	2.584	1.109	3.589	0.08	3.19859	89.4283	3.96469	967.487	-2.17653	68.753	94.2932	0	NA	NA	NA	NA	0	NA	NA	NA	1.75947e-08	58	1.30781	NA	NA
2021-03-18 17:50:00	OP-50m	UA-150m	MC	451.591	86.881	16.0089	4.17991	0.314545	-294.2	0.01007	2.991	2.584	1.109	3.589	0.08	3.19859	89.4283	3.96469	967.487	-2.17653	68.753	94.2932	0	NA	NA	NA	NA	0	NA	NA	0.000230218	2.55275e-06	1636940	1.31483	-0.000577146	NA
2021-03-18 17:50:00	OP-UW	UA-150m	MC	451.591	86.881	16.0089	4.17991	0.314545	-294.2	0.01007	2.991	2.584	1.109	3.589	0.08	3.19859	89.4283	3.96469	967.487	-2.17653	68.753	94.2932	0	NA	NA	NA	NA	0	NA	NA	0	NA	0	1.31487	NA	NA
2021-03-18 18:00:00	OP-100m	UA-UW	MC	451.591	71.947	14.9194	2.77211	0.183868	-37.8	0.004096	3.025	2.559	1.249	4.029	0.2	2.59103	65.4002	3.56776	967.55	-2.24693	70.55	48.2004	0	NA	NA	NA	NA	0	NA	NA	NA	3.16835e-06	915086	1.32817	NA	NA
2021-03-18 18:00:00	OP-150m	UA-UW	MC	451.591	71.947	14.9194	2.77211	0.183868	-37.8	0.004096	3.025	2.559	1.249	4.029	0.2	2.59103	65.4002	3.56776	967.55	-2.24693	70.55	48.2004	0	NA	NA	NA	NA	0	NA	NA	NA	9.02808e-07	99746	1.29986	NA	NA
2021-03-18 18:00:00	OP-200m	UA-UW	MC	451.591	71.947	14.9194	2.77211	0.183868	-37.8	0.004096	3.025	2.559	1.249	4.029	0.2	2.59103	65.4002	3.56776	967.55	-2.24693	70.55	48.2004	0	NA	NA	NA	NA	0	NA	NA	NA	3.44854e-07	11757	1.30685	NA	NA
2021-03-18 18:00:00	OP-50m	UA-UW	MC	451.591	71.947	14.9194	2.77211	0.183868	-37.8	0.004096	3.025	2.559	1.249	4.029	0.2	2.59103	65.4002	3.56776	967.55	-2.24693	70.55	48.2004	0	NA	NA	NA	NA	0	NA	NA	0.000756624	7.19028e-06	3293654	1.30045	-0.0462124	NA
2021-03-18 18:00:00	OP-UW	UA-UW	MC	451.591	71.947	14.9194	2.77211	0.183868	-37.8	0.004096	3.025	2.559	1.249	4.029	0.2	2.59103	65.4002	3.56776	967.55	-2.24693	70.55	48.2004	0	NA	NA	NA	NA	0	NA	NA	0	NA	0	1.31016	NA	NA
2021-03-18 18:00:00	OP-100m	UA-100m	MC	451.591	66.745	12.4818	3.1729	0.22303	-265.1	0.00692	2.467	2.317	1.133	3.696	0.08	2.59103	65.4002	3.56776	967.55	-2.24693	70.55	48.2004	0	NA	NA	NA	NA	0	NA	NA	0.000344883	4.1817e-06	1740043	1.32817	0.187968	NA
2021-03-18 18:00:00	OP-150m	UA-100m	MC	451.591	66.745	12.4818	3.1729	0.22303	-265.1	0.00692	2.467	2.317	1.133	3.696	0.08	2.59103	65.4002	3.56776	967.55	-2.24693	70.55	48.2004	0	NA	NA	NA	NA	0	NA	NA	NA	2.64842e-06	443272	1.29986	NA	NA
2021-03-18 18:00:00	OP-200m	UA-100m	MC	451.591	66.745	12.4818	3.1729	0.22303	-265.1	0.00692	2.467	2.317	1.133	3.696	0.08	2.59103	65.4002	3.56776	967.55	-2.24693	70.55	48.2004	0	NA	NA	NA	NA	0	NA	NA	NA	6.19038e-07	73447	1.30685	NA	NA
2021-03-18 18:00:00	OP-50m	UA-100m	MC	451.591	66.745	12.4818	3.1729	0.22303	-265.1	0.00692	2.467	2.317	1.133	3.696	0.08	2.59103	65.4002	3.56776	967.55	-2.24693	70.55	48.2004	0	NA	NA	NA	NA	0	NA	NA	0.000703922	6.03329e-06	3555153	1.30045	-0.0496722	NA
2021-03-18 18:00:00	OP-UW	UA-100m	MC	451.591	66.745	12.4818	3.1729	0.22303	-265.1	0.00692	2.467	2.317	1.133	3.696	0.08	2.59103	65.4002	3.56776	967.55	-2.24693	70.55	48.2004	0	NA	NA	NA	NA	0	NA	NA	0	NA	0	1.31016	NA	NA
2021-03-18 18:00:00	OP-100m	UA-150m	MC	451.591	65.992	12.2395	3.02254	0.248693	566.2	0.0166	2.519	2.137	1.111	3.634	0.08	2.59103	65.4002	3.56776	967.55	-2.24693	70.55	48.2004	0	NA	NA	NA	NA	0	NA	NA	0.000348315	3.8221e-06	1932780	1.32817	0.186116	NA
2021-03-18 18:00:00	OP-150m	UA-150m	MC	451.591	65.992	12.2395	3.02254	0.248693	566.2	0.0166	2.519	2.137	1.111	3.634	0.08	2.59103	65.4002	3.56776	967.55	-2.24693	70.55	48.2004	0	NA	NA	NA	NA	0	NA	NA	NA	1.83326e-06	559114	1.29986	NA	NA
2021-03-18 18:00:00	OP-200m	UA-150m	MC	451.591	65.992	12.2395	3.02254	0.248693	566.2	0.0166	2.519	2.137	1.111	3.634	0.08	2.59103	65.4002	3.56776	967.55	-2.24693	70.55	48.2004	0	NA	NA	NA	NA	0	NA	NA	NA	6.82182e-07	101878	1.30685	NA	NA
2021-03-18 18:00:00	OP-50m	UA-150m	MC	451.591	65.992	12.2395	3.02254	0.248693	566.2	0.0166	2.519	2.137	1.111	3.634	0.08	2.59103	65.4002	3.56776	967.55	-2.24693	70.55	48.2004	0	NA	NA	NA	NA	0	NA	NA	0.000680011	5.60436e-06	3735984	1.30045	-0.0514188	NA
2021-03-18 18:00:00	OP-UW	UA-150m	MC	451.591	65.992	12.2395	3.02254	0.248693	566.2	0.0166	2.519	2.137	1.111	3.634	0.08	2.59103	65.4002	3.56776	967.55	-2.24693	70.55	48.2004	0	NA	NA	NA	NA	0	NA	NA	0	NA	0	1.31016	NA	NA
2021-03-18 18:20:00	OP-100m	UA-UW	MC	451.591	36.304	20.3839	0.628903	0.0291225	-2.7	0.0001571	7.24	7.732	2.071	5.516	0.2	2.7102	29.3767	0.583664	967.487	-2.92653	66.7806	20.9127	0	NA	NA	NA	NA	0	NA	NA	NA	1.98595e-05	808505	1.32096	NA	NA
2021-03-18 18:20:00	OP-150m	UA-UW	MC	451.591	36.304	20.3839	0.628903	0.0291225	-2.7	0.0001571	7.24	7.732	2.071	5.516	0.2	2.7102	29.3767	0.583664	967.487	-2.92653	66.7806	20.9127	0	NA	NA	NA	NA	0	NA	NA	NA	1.89185e-05	432547	1.30095	NA	NA
2021-03-18 18:20:00	OP-200m	UA-UW	MC	451.591	36.304	20.3839	0.628903	0.0291225	-2.7	0.0001571	7.24	7.732	2.071	5.516	0.2	2.7102	29.3767	0.583664	967.487	-2.92653	66.7806	20.9127	0	NA	NA	NA	NA	0	NA	NA	NA	1.2971e-05	257680	1.29989	NA	NA
2021-03-18 18:20:00	OP-50m	UA-UW	MC	451.591	36.304	20.3839	0.628903	0.0291225	-2.7	0.0001571	7.24	7.732	2.071	5.516	0.2	2.7102	29.3767	0.583664	967.487	-2.92653	66.7806	20.9127	0	NA	NA	NA	NA	0	NA	NA	NA	3.17715e-05	1812840	1.30374	NA	NA
2021-03-18 18:20:00	OP-UW	UA-UW	MC	451.591	36.304	20.3839	0.628903	0.0291225	-2.7	0.0001571	7.24	7.732	2.071	5.516	0.2	2.7102	29.3767	0.583664	967.487	-2.92653	66.7806	20.9127	0	NA	NA	NA	NA	0	NA	NA	NA	NA	0	1.32527	NA	NA
2021-03-18 18:20:00	OP-100m	UA-100m	MC	451.591	26.94	22.0254	0.952662	0.0451507	1	0.6136	5.483	6.111	2.084	15.249	0.08	2.7102	29.3767	0.583664	967.487	-2.92653	66.7806	20.9127	0	NA	NA	NA	NA	0	NA	NA	NA	2.37294e-05	8188216	1.32096	NA	NA
2021-03-18 18:20:00	OP-150m	UA-100m	MC	451.591	26.94	22.0254	0.952662	0.0451507	1	0.6136	5.483	6.111	2.084	15.249	0.08	2.7102	29.3767	0.583664	967.487	-2.92653	66.7806	20.9127	0	NA	NA	NA	NA	0	NA	NA	NA	1.58998e-05	4079902	1.30095	NA	NA
2021-03-18 18:20:00	OP-200m	UA-100m	MC	451.591	26.94	22.0254	0.952662	0.0451507	1	0.6136	5.483	6.111	2.084	15.249	0.08	2.7102	29.3767	0.583664	967.487	-2.92653	66.7806	20.9127	0	NA	NA	NA	NA	0	NA	NA	NA	1.05985e-05	1639736	1.29989	NA	NA
2021-03-18 18:20:00	OP-50m	UA-100m	MC	451.591	26.94	22.0254	0.952662	0.0451507	1	0.6136	5.483	6.111	2.084	15.249	0.08	2.7102	29.3767	0.583664	967.487	-2.92653	66.7806	20.9127	0	NA	NA	NA	NA	0	NA	NA	NA	3.60767e-05	13205243	1.30374	NA	NA
2021-03-18 18:20:00	OP-UW	UA-100m	MC	451.591	26.94	22.0254	0.952662	0.0451507	1	0.6136	5.483	6.111	2.084	15.249	0.08	2.7102	29.3767	0.583664	967.487	-2.92653	66.7806	20.9127	0	NA	NA	NA	NA	0	NA	NA	NA	NA	0	1.32527	NA	NA
2021-03-18 18:30:00	OP-100m	UA-UW	MC	451.591	349.613	9.03168	1.10954	0.0559356	14.4	0.001414	3.563	2.75	1.4	5.533	0.2	2.59246	15.4497	1.01143	967.5	-2.30307	70.0183	8.49505	0	NA	NA	NA	NA	0	NA	NA	NA	NA	0	1.31842	NA	NA
2021-03-18 18:30:00	OP-150m	UA-UW	MC	451.591	349.613	9.03168	1.10954	0.0559356	14.4	0.001414	3.563	2.75	1.4	5.533	0.2	2.59246	15.4497	1.01143	967.5	-2.30307	70.0183	8.49505	0	NA	NA	NA	NA	0	NA	NA	NA	NA	0	1.3057	NA	NA
2021-03-18 18:30:00	OP-200m	UA-UW	MC	451.591	349.613	9.03168	1.10954	0.0559356	14.4	0.001414	3.563	2.75	1.4	5.533	0.2	2.59246	15.4497	1.01143	967.5	-2.30307	70.0183	8.49505	0	NA	NA	NA	NA	0	NA	NA	NA	NA	0	1.30348	NA	NA
2021-03-18 18:30:00	OP-50m	UA-UW	MC	451.591	349.613	9.03168	1.10954	0.0559356	14.4	0.001414	3.563	2.75	1.4	5.533	0.2	2.59246	15.4497	1.01143	967.5	-2.30307	70.0183	8.49505	0	NA	NA	NA	NA	0	NA	NA	NA	9.46216e-07	19561	1.30072	NA	NA
2021-03-18 18:30:00	OP-UW	UA-UW	MC	451.591	349.613	9.03168	1.10954	0.0559356	14.4	0.001414	3.563	2.75	1.4	5.533	0.2	2.59246	15.4497	1.01143	967.5	-2.30307	70.0183	8.49505	0	NA	NA	NA	NA	0	NA	NA	NA	NA	0	1.32873	NA	NA
2021-03-18 18:30:00	OP-100m	UA-100m	MC	451.591	358.534	12.0627	1.2553	0.0556559	8.7	0.0008014	4.186	3.399	1.252	4.418	0.08	2.59246	15.4497	1.01143	967.5	-2.30307	70.0183	8.49505	0	NA	NA	NA	NA	0	NA	NA	NA	3.45478e-07	1278	1.31842	NA	NA
2021-03-18 18:30:00	OP-150m	UA-100m	MC	451.591	358.534	12.0627	1.2553	0.0556559	8.7	0.0008014	4.186	3.399	1.252	4.418	0.08	2.59246	15.4497	1.01143	967.5	-2.30307	70.0183	8.49505	0	NA	NA	NA	NA	0	NA	NA	NA	NA	0	1.3057	NA	NA
2021-03-18 18:30:00	OP-200m	UA-100m	MC	451.591	358.534	12.0627	1.2553	0.0556559	8.7	0.0008014	4.186	3.399	1.252	4.418	0.08	2.59246	15.4497	1.01143	967.5	-2.30307	70.0183	8.49505	0	NA	NA	NA	NA	0	NA	NA	NA	NA	0	1.30348	NA	NA
2021-03-18 18:30:00	OP-50m	UA-100m	MC	451.591	358.534	12.0627	1.2553	0.0556559	8.7	0.0008014	4.186	3.399	1.252	4.418	0.08	2.59246	15.4497	1.01143	967.5	-2.30307	70.0183	8.49505	0	NA	NA	NA	NA	0	NA	NA	NA	9.32027e-06	839203	1.30072	NA	NA
2021-03-18 18:30:00	OP-UW	UA-100m	MC	451.591	358.534	12.0627	1.2553	0.0556559	8.7	0.0008014	4.186	3.399	1.252	4.418	0.08	2.59246	15.4497	1.01143	967.5	-2.30307	70.0183	8.49505	0	NA	NA	NA	NA	0	NA	NA	NA	NA	0	1.32873	NA	NA
2021-03-18 18:30:00	OP-100m	UA-150m	MC	451.591	0.213	10.8443	1.25997	0.0395891	2.6	0.0003032	4.743	4.145	1.631	7.923	0.08	2.59246	15.4497	1.01143	967.5	-2.30307	70.0183	8.49505	0	NA	NA	NA	NA	0	NA	NA	NA	2.5465e-08	90	1.31842	NA	NA
2021-03-18 18:30:00	OP-150m	UA-150m	MC	451.591	0.213	10.8443	1.25997	0.0395891	2.6	0.0003032	4.743	4.145	1.631	7.923	0.08	2.59246	15.4497	1.01143	967.5	-2.30307	70.0183	8.49505	0	NA	NA	NA	NA	0	NA	NA	NA	NA	0	1.3057	NA	NA
2021-03-18 18:30:00	OP-200m	UA-150m	MC	451.591	0.213	10.8443	1.25997	0.0395891	2.6	0.0003032	4.743	4.145	1.631	7.923	0.08	2.59246	15.4497	1.01143	967.5	-2.30307	70.0183	8.49505	0	NA	NA	NA	NA	0	NA	NA	NA	NA	0	1.30348	NA	NA
2021-03-18 18:30:00	OP-50m	UA-150m	MC	451.591	0.213	10.8443	1.25997	0.0395891	2.6	0.0003032	4.743	4.145	1.631	7.923	0.08	2.59246	15.4497	1.01143	967.5	-2.30307	70.0183	8.49505	0	NA	NA	NA	NA	0	NA	NA	NA	1.13533e-05	1046079	1.30072	NA	NA
2021-03-18 18:30:00	OP-UW	UA-150m	MC	451.591	0.213	10.8443	1.25997	0.0395891	2.6	0.0003032	4.743	4.145	1.631	7.923	0.08	2.59246	15.4497	1.01143	967.5	-2.30307	70.0183	8.49505	0	NA	NA	NA	NA	0	NA	NA	NA	NA	0	1.32873	NA	NA
2021-03-18 18:40:00	OP-100m	UA-UW	MC	451.591	4.82	6.69215	1.11077	0.0230098	1	0.0001571	5.745	5.099	2.929	40.751	0.2	2.35388	5.20645	1.18143	967.5	-2.43673	71.0143	3.71436	0	NA	NA	NA	NA	0	NA	NA	NA	NA	0	1.3192	NA	NA
2021-03-18 18:40:00	OP-150m	UA-UW	MC	451.591	4.82	6.69215	1.11077	0.0230098	1	0.0001571	5.745	5.099	2.929	40.751	0.2	2.35388	5.20645	1.18143	967.5	-2.43673	71.0143	3.71436	0	NA	NA	NA	NA	0	NA	NA	NA	NA	0	1.31946	NA	NA
2021-03-18 18:40:00	OP-200m	UA-UW	MC	451.591	4.82	6.69215	1.11077	0.0230098	1	0.0001571	5.745	5.099	2.929	40.751	0.2	2.35388	5.20645	1.18143	967.5	-2.43673	71.0143	3.71436	0	NA	NA	NA	NA	0	NA	NA	NA	NA	0	1.31894	NA	NA
2021-03-18 18:40:00	OP-50m	UA-UW	MC	451.591	4.82	6.69215	1.11077	0.0230098	1	0.0001571	5.745	5.099	2.929	40.751	0.2	2.35388	5.20645	1.18143	967.5	-2.43673	71.0143	3.71436	0	NA	NA	NA	NA	0	NA	NA	NA	1.93091e-05	2792758	1.31556	NA	NA
2021-03-18 18:40:00	OP-UW	UA-UW	MC	451.591	4.82	6.69215	1.11077	0.0230098	1	0.0001571	5.745	5.099	2.929	40.751	0.2	2.35388	5.20645	1.18143	967.5	-2.43673	71.0143	3.71436	0	NA	NA	NA	NA	0	NA	NA	NA	NA	0	1.33964	NA	NA
2021-03-18 18:40:00	OP-100m	UA-100m	MC	451.591	9.321	5.58429	1.25093	0.0436348	2.4	0.001584	3.153	2.37	1.433	5.825	0.08	2.35388	5.20645	1.18143	967.5	-2.43673	71.0143	3.71436	0	NA	NA	NA	NA	0	NA	NA	NA	5.4297e-09	23	1.3192	NA	NA
2021-03-18 18:40:00	OP-150m	UA-100m	MC	451.591	9.321	5.58429	1.25093	0.0436348	2.4	0.001584	3.153	2.37	1.433	5.825	0.08	2.35388	5.20645	1.18143	967.5	-2.43673	71.0143	3.71436	0	NA	NA	NA	NA	0	NA	NA	NA	NA	0	1.31946	NA	NA
2021-03-18 18:40:00	OP-200m	UA-100m	MC	451.591	9.321	5.58429	1.25093	0.0436348	2.4	0.001584	3.153	2.37	1.433	5.825	0.08	2.35388	5.20645	1.18143	967.5	-2.43673	71.0143	3.71436	0	NA	NA	NA	NA	0	NA	NA	NA	NA	0	1.31894	NA	NA
2021-03-18 18:40:00	OP-50m	UA-100m	MC	451.591	9.321	5.58429	1.25093	0.0436348	2.4	0.001584	3.153	2.37	1.433	5.825	0.08	2.35388	5.20645	1.18143	967.5	-2.43673	71.0143	3.71436	0	NA	NA	NA	NA	0	NA	NA	NA	2.62131e-05	3981687	1.31556	NA	NA
2021-03-18 18:40:00	OP-UW	UA-100m	MC	451.591	9.321	5.58429	1.25093	0.0436348	2.4	0.001584	3.153	2.37	1.433	5.825	0.08	2.35388	5.20645	1.18143	967.5	-2.43673	71.0143	3.71436	0	NA	NA	NA	NA	0	NA	NA	NA	NA	0	1.33964	NA	NA
2021-03-18 18:40:00	OP-100m	UA-150m	MC	451.591	11.371	5.54924	1.33011	0.0402703	2.6	0.0001978	3.359	2.923	1.56	7.1	0.08	2.35388	5.20645	1.18143	967.5	-2.43673	71.0143	3.71436	0	NA	NA	NA	NA	0	NA	NA	NA	6.76783e-07	11077	1.3192	NA	NA
2021-03-18 18:40:00	OP-150m	UA-150m	MC	451.591	11.371	5.54924	1.33011	0.0402703	2.6	0.0001978	3.359	2.923	1.56	7.1	0.08	2.35388	5.20645	1.18143	967.5	-2.43673	71.0143	3.71436	0	NA	NA	NA	NA	0	NA	NA	NA	NA	0	1.31946	NA	NA
2021-03-18 18:40:00	OP-200m	UA-150m	MC	451.591	11.371	5.54924	1.33011	0.0402703	2.6	0.0001978	3.359	2.923	1.56	7.1	0.08	2.35388	5.20645	1.18143	967.5	-2.43673	71.0143	3.71436	0	NA	NA	NA	NA	0	NA	NA	NA	NA	0	1.31894	NA	NA
2021-03-18 18:40:00	OP-50m	UA-150m	MC	451.591	11.371	5.54924	1.33011	0.0402703	2.6	0.0001978	3.359	2.923	1.56	7.1	0.08	2.35388	5.20645	1.18143	967.5	-2.43673	71.0143	3.71436	0	NA	NA	NA	NA	0	NA	NA	NA	2.90993e-05	3696070	1.31556	NA	NA
2021-03-18 18:40:00	OP-UW	UA-150m	MC	451.591	11.371	5.54924	1.33011	0.0402703	2.6	0.0001978	3.359	2.923	1.56	7.1	0.08	2.35388	5.20645	1.18143	967.5	-2.43673	71.0143	3.71436	0	NA	NA	NA	NA	0	NA	NA	NA	NA	0	1.33964	NA	NA
2021-03-18 18:50:00	OP-100m	UA-UW	MC	451.591	21.281	11.357	1.24271	0.0878892	9.9	0.01882	2.293	2.311	1.285	4.64	0.2	2.21061	18.5978	1.20673	967.413	-2.52347	70.9857	1.20208	0	NA	NA	NA	NA	0	NA	NA	NA	9.83922e-06	2506829	1.3216	NA	NA
2021-03-18 18:50:00	OP-150m	UA-UW	MC	451.591	21.281	11.357	1.24271	0.0878892	9.9	0.01882	2.293	2.311	1.285	4.64	0.2	2.21061	18.5978	1.20673	967.413	-2.52347	70.9857	1.20208	0	NA	NA	NA	NA	0	NA	NA	NA	3.37664e-06	223741	1.31657	NA	NA
2021-03-18 18:50:00	OP-200m	UA-UW	MC	451.591	21.281	11.357	1.24271	0.0878892	9.9	0.01882	2.293	2.311	1.285	4.64	0.2	2.21061	18.5978	1.20673	967.413	-2.52347	70.9857	1.20208	0	NA	NA	NA	NA	0	NA	NA	NA	1.68004e-07	4023	1.31933	NA	NA
2021-03-18 18:50:00	OP-50m	UA-UW	MC	451.591	21.281	11.357	1.24271	0.0878892	9.9	0.01882	2.293	2.311	1.285	4.64	0.2	2.21061	18.5978	1.20673	967.413	-2.52347	70.9857	1.20208	0	NA	NA	NA	NA	0	NA	NA	NA	1.60914e-05	5232524	1.32076	NA	NA
2021-03-18 18:50:00	OP-UW	UA-UW	MC	451.591	21.281	11.357	1.24271	0.0878892	9.9	0.01882	2.293	2.311	1.285	4.64	0.2	2.21061	18.5978	1.20673	967.413	-2.52347	70.9857	1.20208	0	NA	NA	NA	NA	0	NA	NA	NA	NA	0	1.33237	NA	NA
2021-03-18 18:50:00	OP-100m	UA-100m	MC	451.591	20.139	8.36502	1.26329	0.0515117	2.1	0.01372	3.572	3.148	1.431	5.807	0.08	2.21061	18.5978	1.20673	967.413	-2.52347	70.9857	1.20208	0	NA	NA	NA	NA	0	NA	NA	NA	1.53097e-05	2811878	1.3216	NA	NA
2021-03-18 18:50:00	OP-150m	UA-100m	MC	451.591	20.139	8.36502	1.26329	0.0515117	2.1	0.01372	3.572	3.148	1.431	5.807	0.08	2.21061	18.5978	1.20673	967.413	-2.52347	70.9857	1.20208	0	NA	NA	NA	NA	0	NA	NA	NA	2.22293e-06	116162	1.31657	NA	NA
2021-03-18 18:50:00	OP-200m	UA-100m	MC	451.591	20.139	8.36502	1.26329	0.0515117	2.1	0.01372	3.572	3.148	1.431	5.807	0.08	2.21061	18.5978	1.20673	967.413	-2.52347	70.9857	1.20208	0	NA	NA	NA	NA	0	NA	NA	NA	7.21691e-08	516	1.31933	NA	NA
2021-03-18 18:50:00	OP-50m	UA-100m	MC	451.591	20.139	8.36502	1.26329	0.0515117	2.1	0.01372	3.572	3.148	1.431	5.807	0.08	2.21061	18.5978	1.20673	967.413	-2.52347	70.9857	1.20208	0	NA	NA	NA	NA	0	NA	NA	NA	2.58563e-05	5682888	1.32076	NA	NA
2021-03-18 18:50:00	OP-UW	UA-100m	MC	451.591	20.139	8.36502	1.26329	0.0515117	2.1	0.01372	3.572	3.148	1.431	5.807	0.08	2.21061	18.5978	1.20673	967.413	-2.52347	70.9857	1.20208	0	NA	NA	NA	NA	0	NA	NA	NA	NA	0	1.33237	NA	NA
2021-03-18 18:50:00	OP-100m	UA-150m	MC	451.591	20.567	8.0122	1.36589	0.0380638	1.2	0.005835	4.862	4.55	1.95	12.684	0.08	2.21061	18.5978	1.20673	967.413	-2.52347	70.9857	1.20208	0	NA	NA	NA	NA	0	NA	NA	NA	1.80944e-05	3251642	1.3216	NA	NA
2021-03-18 18:50:00	OP-150m	UA-150m	MC	451.591	20.567	8.0122	1.36589	0.0380638	1.2	0.005835	4.862	4.55	1.95	12.684	0.08	2.21061	18.5978	1.20673	967.413	-2.52347	70.9857	1.20208	0	NA	NA	NA	NA	0	NA	NA	NA	3.00292e-06	167015	1.31657	NA	NA
2021-03-18 18:50:00	OP-200m	UA-150m	MC	451.591	20.567	8.0122	1.36589	0.0380638	1.2	0.005835	4.862	4.55	1.95	12.684	0.08	2.21061	18.5978	1.20673	967.413	-2.52347	70.9857	1.20208	0	NA	NA	NA	NA	0	NA	NA	NA	1.79063e-07	834	1.31933	NA	NA
2021-03-18 18:50:00	OP-50m	UA-150m	MC	451.591	20.567	8.0122	1.36589	0.0380638	1.2	0.005835	4.862	4.55	1.95	12.684	0.08	2.21061	18.5978	1.20673	967.413	-2.52347	70.9857	1.20208	0	NA	NA	NA	NA	0	NA	NA	NA	2.70408e-05	5302203	1.32076	NA	NA
2021-03-18 18:50:00	OP-UW	UA-150m	MC	451.591	20.567	8.0122	1.36589	0.0380638	1.2	0.005835	4.862	4.55	1.95	12.684	0.08	2.21061	18.5978	1.20673	967.413	-2.52347	70.9857	1.20208	0	NA	NA	NA	NA	0	NA	NA	NA	NA	0	1.33237	NA	NA
2021-03-18 19:00:00	OP-100m	UA-UW	MC	451.591	31.25	25.0758	1.2966	0.0683641	12.4	0.00225	3.661	4.814	1.948	12.649	0.2	2.15592	16.5989	1.4755	967.437	-2.65	70.7806	0.266337	0	NA	NA	NA	NA	0	NA	NA	NA	1.26362e-05	3523793	1.35454	NA	NA
2021-03-18 19:00:00	OP-150m	UA-UW	MC	451.591	31.25	25.0758	1.2966	0.0683641	12.4	0.00225	3.661	4.814	1.948	12.649	0.2	2.15592	16.5989	1.4755	967.437	-2.65	70.7806	0.266337	0	NA	NA	NA	NA	0	NA	NA	NA	1.03324e-05	2313450	1.33495	NA	NA
2021-03-18 19:00:00	OP-200m	UA-UW	MC	451.591	31.25	25.0758	1.2966	0.0683641	12.4	0.00225	3.661	4.814	1.948	12.649	0.2	2.15592	16.5989	1.4755	967.437	-2.65	70.7806	0.266337	0	NA	NA	NA	NA	0	NA	NA	NA	7.27553e-06	1432372	1.33724	NA	NA
2021-03-18 19:00:00	OP-50m	UA-UW	MC	451.591	31.25	25.0758	1.2966	0.0683641	12.4	0.00225	3.661	4.814	1.948	12.649	0.2	2.15592	16.5989	1.4755	967.437	-2.65	70.7806	0.266337	0	NA	NA	NA	NA	0	NA	NA	NA	1.44772e-05	5186136	1.35971	NA	NA
2021-03-18 19:00:00	OP-UW	UA-UW	MC	451.591	31.25	25.0758	1.2966	0.0683641	12.4	0.00225	3.661	4.814	1.948	12.649	0.2	2.15592	16.5989	1.4755	967.437	-2.65	70.7806	0.266337	0	NA	NA	NA	NA	0	NA	NA	NA	NA	0	1.36794	NA	NA
2021-03-18 19:00:00	OP-100m	UA-100m	MC	451.591	20.931	18.9527	1.50714	0.0744031	4.4	0.00644	3.904	3.395	1.417	5.681	0.08	2.15592	16.5989	1.4755	967.437	-2.65	70.7806	0.266337	0	NA	NA	NA	NA	0	NA	NA	NA	1.18713e-05	2623379	1.35454	NA	NA
2021-03-18 19:00:00	OP-150m	UA-100m	MC	451.591	20.931	18.9527	1.50714	0.0744031	4.4	0.00644	3.904	3.395	1.417	5.681	0.08	2.15592	16.5989	1.4755	967.437	-2.65	70.7806	0.266337	0	NA	NA	NA	NA	0	NA	NA	NA	4.25368e-06	387872	1.33495	NA	NA
2021-03-18 19:00:00	OP-200m	UA-100m	MC	451.591	20.931	18.9527	1.50714	0.0744031	4.4	0.00644	3.904	3.395	1.417	5.681	0.08	2.15592	16.5989	1.4755	967.437	-2.65	70.7806	0.266337	0	NA	NA	NA	NA	0	NA	NA	NA	9.43373e-07	27481	1.33724	NA	NA
2021-03-18 19:00:00	OP-50m	UA-100m	MC	451.591	20.931	18.9527	1.50714	0.0744031	4.4	0.00644	3.904	3.395	1.417	5.681	0.08	2.15592	16.5989	1.4755	967.437	-2.65	70.7806	0.266337	0	NA	NA	NA	NA	0	NA	NA	NA	1.8156e-05	5433043	1.35971	NA	NA
2021-03-18 19:00:00	OP-UW	UA-100m	MC	451.591	20.931	18.9527	1.50714	0.0744031	4.4	0.00644	3.904	3.395	1.417	5.681	0.08	2.15592	16.5989	1.4755	967.437	-2.65	70.7806	0.266337	0	NA	NA	NA	NA	0	NA	NA	NA	NA	0	1.36794	NA	NA
2021-03-18 19:00:00	OP-100m	UA-150m	MC	451.591	18.069	19.624	1.57101	0.066657	2.5	0.009835	4.343	4.666	1.651	8.17	0.08	2.15592	16.5989	1.4755	967.437	-2.65	70.7806	0.266337	0	NA	NA	NA	NA	0	NA	NA	NA	1.00339e-05	2237211	1.35454	NA	NA
2021-03-18 19:00:00	OP-150m	UA-150m	MC	451.591	18.069	19.624	1.57101	0.066657	2.5	0.009835	4.343	4.666	1.651	8.17	0.08	2.15592	16.5989	1.4755	967.437	-2.65	70.7806	0.266337	0	NA	NA	NA	NA	0	NA	NA	NA	2.97687e-06	302730	1.33495	NA	NA
2021-03-18 19:00:00	OP-200m	UA-150m	MC	451.591	18.069	19.624	1.57101	0.066657	2.5	0.009835	4.343	4.666	1.651	8.17	0.08	2.15592	16.5989	1.4755	967.437	-2.65	70.7806	0.266337	0	NA	NA	NA	NA	0	NA	NA	NA	7.24034e-07	22495	1.33724	NA	NA
2021-03-18 19:00:00	OP-50m	UA-150m	MC	451.591	18.069	19.624	1.57101	0.066657	2.5	0.009835	4.343	4.666	1.651	8.17	0.08	2.15592	16.5989	1.4755	967.437	-2.65	70.7806	0.266337	0	NA	NA	NA	NA	0	NA	NA	NA	1.81361e-05	6004032	1.35971	NA	NA
2021-03-18 19:00:00	OP-UW	UA-150m	MC	451.591	18.069	19.624	1.57101	0.066657	2.5	0.009835	4.343	4.666	1.651	8.17	0.08	2.15592	16.5989	1.4755	967.437	-2.65	70.7806	0.266337	0	NA	NA	NA	NA	0	NA	NA	NA	NA	0	1.36794	NA	NA
2021-03-18 19:10:00	OP-100m	UA-UW	MC	451.591	57.099	11.9654	1.92574	0.189964	32.7	0.04698	2.976	2.166	1.217	4.199	0.2	2.02531	43.6323	1.79101	967.413	-2.8102	70.2623	0.0132675	0	NA	NA	NA	NA	0	NA	NA	0.000633493	5.5427e-06	2914956	1.3471	0.0834978	NA
2021-03-18 19:10:00	OP-150m	UA-UW	MC	451.591	57.099	11.9654	1.92574	0.189964	32.7	0.04698	2.976	2.166	1.217	4.199	0.2	2.02531	43.6323	1.79101	967.413	-2.8102	70.2623	0.0132675	0	NA	NA	NA	NA	0	NA	NA	0.000449597	4.91719e-06	2076459	1.32774	-0.0373305	NA
2021-03-18 19:10:00	OP-200m	UA-UW	MC	451.591	57.099	11.9654	1.92574	0.189964	32.7	0.04698	2.976	2.166	1.217	4.199	0.2	2.02531	43.6323	1.79101	967.413	-2.8102	70.2623	0.0132675	0	NA	NA	NA	NA	0	NA	NA	0.000281962	3.57198e-06	1320287	1.33868	0.0800752	NA
2021-03-18 19:10:00	OP-50m	UA-UW	MC	451.591	57.099	11.9654	1.92574	0.189964	32.7	0.04698	2.976	2.166	1.217	4.199	0.2	2.02531	43.6323	1.79101	967.413	-2.8102	70.2623	0.0132675	0	NA	NA	NA	NA	0	NA	NA	0.000960673	8.0707e-06	4405635	1.34703	0.0547946	NA
2021-03-18 19:10:00	OP-UW	UA-UW	MC	451.591	57.099	11.9654	1.92574	0.189964	32.7	0.04698	2.976	2.166	1.217	4.199	0.2	2.02531	43.6323	1.79101	967.413	-2.8102	70.2623	0.0132675	0	NA	NA	NA	NA	0	NA	NA	0	NA	0	1.33241	NA	NA
2021-03-18 19:10:00	OP-100m	UA-100m	MC	451.591	51.246	12.2082	1.7956	0.129688	8.2	0.02785	3.187	2.578	1.48	6.268	0.08	2.02531	43.6323	1.79101	967.413	-2.8102	70.2623	0.0132675	0	NA	NA	NA	NA	0	NA	NA	NA	8.72407e-06	4192275	1.3471	NA	NA
2021-03-18 19:10:00	OP-150m	UA-100m	MC	451.591	51.246	12.2082	1.7956	0.129688	8.2	0.02785	3.187	2.578	1.48	6.268	0.08	2.02531	43.6323	1.79101	967.413	-2.8102	70.2623	0.0132675	0	NA	NA	NA	NA	0	NA	NA	NA	7.5743e-06	3328169	1.32774	NA	NA
2021-03-18 19:10:00	OP-200m	UA-100m	MC	451.591	51.246	12.2082	1.7956	0.129688	8.2	0.02785	3.187	2.578	1.48	6.268	0.08	2.02531	43.6323	1.79101	967.413	-2.8102	70.2623	0.0132675	0	NA	NA	NA	NA	0	NA	NA	NA	6.96413e-06	2797892	1.33868	NA	NA
2021-03-18 19:10:00	OP-50m	UA-100m	MC	451.591	51.246	12.2082	1.7956	0.129688	8.2	0.02785	3.187	2.578	1.48	6.268	0.08	2.02531	43.6323	1.79101	967.413	-2.8102	70.2623	0.0132675	0	NA	NA	NA	NA	0	NA	NA	NA	9.80536e-06	5714879	1.34703	NA	NA
2021-03-18 19:10:00	OP-UW	UA-100m	MC	451.591	51.246	12.2082	1.7956	0.129688	8.2	0.02785	3.187	2.578	1.48	6.268	0.08	2.02531	43.6323	1.79101	967.413	-2.8102	70.2623	0.0132675	0	NA	NA	NA	NA	0	NA	NA	NA	NA	0	1.33241	NA	NA
2021-03-18 19:10:00	OP-100m	UA-150m	MC	451.591	51.303	10.1875	1.93702	0.101373	4.5	0.009253	4.089	2.966	1.72	9.072	0.08	2.02531	43.6323	1.79101	967.413	-2.8102	70.2623	0.0132675	0	NA	NA	NA	NA	0	NA	NA	NA	1.05052e-05	4796369	1.3471	NA	NA
2021-03-18 19:10:00	OP-150m	UA-150m	MC	451.591	51.303	10.1875	1.93702	0.101373	4.5	0.009253	4.089	2.966	1.72	9.072	0.08	2.02531	43.6323	1.79101	967.413	-2.8102	70.2623	0.0132675	0	NA	NA	NA	NA	0	NA	NA	NA	9.28816e-06	3950988	1.32774	NA	NA
2021-03-18 19:10:00	OP-200m	UA-150m	MC	451.591	51.303	10.1875	1.93702	0.101373	4.5	0.009253	4.089	2.966	1.72	9.072	0.08	2.02531	43.6323	1.79101	967.413	-2.8102	70.2623	0.0132675	0	NA	NA	NA	NA	0	NA	NA	NA	8.47583e-06	3404130	1.33868	NA	NA
2021-03-18 19:10:00	OP-50m	UA-150m	MC	451.591	51.303	10.1875	1.93702	0.101373	4.5	0.009253	4.089	2.966	1.72	9.072	0.08	2.02531	43.6323	1.79101	967.413	-2.8102	70.2623	0.0132675	0	NA	NA	NA	NA	0	NA	NA	NA	1.22054e-05	6084020	1.34703	NA	NA
2021-03-18 19:10:00	OP-UW	UA-150m	MC	451.591	51.303	10.1875	1.93702	0.101373	4.5	0.009253	4.089	2.966	1.72	9.072	0.08	2.02531	43.6323	1.79101	967.413	-2.8102	70.2623	0.0132675	0	NA	NA	NA	NA	0	NA	NA	NA	NA	0	1.33241	NA	NA
2021-03-18 19:20:00	OP-100m	UA-UW	MC	451.591	62.77	8.29086	1.57933	0.0835663	7.9	0.003571	4.909	2.567	1.436	5.852	0.2	2.03061	57.977	1.9445	967.313	-2.6898	71.305	0	0	NA	NA	NA	NA	0	NA	NA	NA	1.34908e-05	3622415	1.34022	NA	NA
2021-03-18 19:20:00	OP-150m	UA-UW	MC	451.591	62.77	8.29086	1.57933	0.0835663	7.9	0.003571	4.909	2.567	1.436	5.852	0.2	2.03061	57.977	1.9445	967.313	-2.6898	71.305	0	0	NA	NA	NA	NA	0	NA	NA	NA	8.33186e-06	1844900	1.3171	NA	NA
2021-03-18 19:20:00	OP-200m	UA-UW	MC	451.591	62.77	8.29086	1.57933	0.0835663	7.9	0.003571	4.909	2.567	1.436	5.852	0.2	2.03061	57.977	1.9445	967.313	-2.6898	71.305	0	0	NA	NA	NA	NA	0	NA	NA	NA	3.15779e-06	371236	1.32459	NA	NA
2021-03-18 19:20:00	OP-50m	UA-UW	MC	451.591	62.77	8.29086	1.57933	0.0835663	7.9	0.003571	4.909	2.567	1.436	5.852	0.2	2.03061	57.977	1.9445	967.313	-2.6898	71.305	0	0	NA	NA	NA	NA	0	NA	NA	NA	1.58707e-05	4906277	1.3399	NA	NA
2021-03-18 19:20:00	OP-UW	UA-UW	MC	451.591	62.77	8.29086	1.57933	0.0835663	7.9	0.003571	4.909	2.567	1.436	5.852	0.2	2.03061	57.977	1.9445	967.313	-2.6898	71.305	0	0	NA	NA	NA	NA	0	NA	NA	NA	NA	0	1.32424	NA	NA
2021-03-18 19:20:00	OP-100m	UA-100m	MC	451.591	60.632	10.673	1.58237	0.107343	7	0.02432	2.666	2.544	1.331	4.975	0.08	2.03061	57.977	1.9445	967.313	-2.6898	71.305	0	0	NA	NA	NA	NA	0	NA	NA	NA	1.06791e-05	4072387	1.34022	NA	NA
2021-03-18 19:20:00	OP-150m	UA-100m	MC	451.591	60.632	10.673	1.58237	0.107343	7	0.02432	2.666	2.544	1.331	4.975	0.08	2.03061	57.977	1.9445	967.313	-2.6898	71.305	0	0	NA	NA	NA	NA	0	NA	NA	NA	8.17093e-06	2593390	1.3171	NA	NA
2021-03-18 19:20:00	OP-200m	UA-100m	MC	451.591	60.632	10.673	1.58237	0.107343	7	0.02432	2.666	2.544	1.331	4.975	0.08	2.03061	57.977	1.9445	967.313	-2.6898	71.305	0	0	NA	NA	NA	NA	0	NA	NA	NA	4.6888e-06	1062528	1.32459	NA	NA
2021-03-18 19:20:00	OP-50m	UA-100m	MC	451.591	60.632	10.673	1.58237	0.107343	7	0.02432	2.666	2.544	1.331	4.975	0.08	2.03061	57.977	1.9445	967.313	-2.6898	71.305	0	0	NA	NA	NA	NA	0	NA	NA	NA	1.32471e-05	5574674	1.3399	NA	NA
2021-03-18 19:20:00	OP-UW	UA-100m	MC	451.591	60.632	10.673	1.58237	0.107343	7	0.02432	2.666	2.544	1.331	4.975	0.08	2.03061	57.977	1.9445	967.313	-2.6898	71.305	0	0	NA	NA	NA	NA	0	NA	NA	NA	NA	0	1.32424	NA	NA
2021-03-18 19:20:00	OP-100m	UA-150m	MC	451.591	60.308	9.94328	1.76895	0.112613	6.4	0.019	2.646	2.639	1.306	4.789	0.08	2.03061	57.977	1.9445	967.313	-2.6898	71.305	0	0	NA	NA	NA	NA	0	NA	NA	NA	1.07728e-05	4027272	1.34022	NA	NA
2021-03-18 19:20:00	OP-150m	UA-150m	MC	451.591	60.308	9.94328	1.76895	0.112613	6.4	0.019	2.646	2.639	1.306	4.789	0.08	2.03061	57.977	1.9445	967.313	-2.6898	71.305	0	0	NA	NA	NA	NA	0	NA	NA	NA	9.55654e-06	2634950	1.3171	NA	NA
2021-03-18 19:20:00	OP-200m	UA-150m	MC	451.591	60.308	9.94328	1.76895	0.112613	6.4	0.019	2.646	2.639	1.306	4.789	0.08	2.03061	57.977	1.9445	967.313	-2.6898	71.305	0	0	NA	NA	NA	NA	0	NA	NA	NA	4.97349e-06	1172677	1.32459	NA	NA
2021-03-18 19:20:00	OP-50m	UA-150m	MC	451.591	60.308	9.94328	1.76895	0.112613	6.4	0.019	2.646	2.639	1.306	4.789	0.08	2.03061	57.977	1.9445	967.313	-2.6898	71.305	0	0	NA	NA	NA	NA	0	NA	NA	NA	1.31576e-05	5414509	1.3399	NA	NA
2021-03-18 19:20:00	OP-UW	UA-150m	MC	451.591	60.308	9.94328	1.76895	0.112613	6.4	0.019	2.646	2.639	1.306	4.789	0.08	2.03061	57.977	1.9445	967.313	-2.6898	71.305	0	0	NA	NA	NA	NA	0	NA	NA	NA	NA	0	1.32424	NA	NA
2021-03-18 19:30:00	OP-100m	UA-UW	MC	451.591	57.511	11.4787	1.47471	0.10909	10.4	0.02294	2.838	2.562	1.508	6.548	0.2	1.7845	56.7893	1.93612	967.213	-2.51327	73.6377	0	0	NA	NA	NA	NA	0	NA	NA	NA	9.22709e-06	3931013	1.3382	NA	NA
2021-03-18 19:30:00	OP-150m	UA-UW	MC	451.591	57.511	11.4787	1.47471	0.10909	10.4	0.02294	2.838	2.562	1.508	6.548	0.2	1.7845	56.7893	1.93612	967.213	-2.51327	73.6377	0	0	NA	NA	NA	NA	0	NA	NA	NA	8.319e-06	2936115	1.31356	NA	NA
2021-03-18 19:30:00	OP-200m	UA-UW	MC	451.591	57.511	11.4787	1.47471	0.10909	10.4	0.02294	2.838	2.562	1.508	6.548	0.2	1.7845	56.7893	1.93612	967.213	-2.51327	73.6377	0	0	NA	NA	NA	NA	0	NA	NA	NA	5.91273e-06	1874518	1.32121	NA	NA
2021-03-18 19:30:00	OP-50m	UA-UW	MC	451.591	57.511	11.4787	1.47471	0.10909	10.4	0.02294	2.838	2.562	1.508	6.548	0.2	1.7845	56.7893	1.93612	967.213	-2.51327	73.6377	0	0	NA	NA	NA	NA	0	NA	NA	NA	1.256e-05	5504747	1.33674	NA	NA
2021-03-18 19:30:00	OP-UW	UA-UW	MC	451.591	57.511	11.4787	1.47471	0.10909	10.4	0.02294	2.838	2.562	1.508	6.548	0.2	1.7845	56.7893	1.93612	967.213	-2.51327	73.6377	0	0	NA	NA	NA	NA	0	NA	NA	NA	NA	0	1.32657	NA	NA
2021-03-18 19:30:00	OP-100m	UA-100m	MC	451.591	50.357	11.7622	1.68736	0.0942874	4.4	0.01626	3.631	3.086	1.715	9.004	0.08	1.7845	56.7893	1.93612	967.213	-2.51327	73.6377	0	0	NA	NA	NA	NA	0	NA	NA	NA	1.10072e-05	4931721	1.3382	NA	NA
2021-03-18 19:30:00	OP-150m	UA-100m	MC	451.591	50.357	11.7622	1.68736	0.0942874	4.4	0.01626	3.631	3.086	1.715	9.004	0.08	1.7845	56.7893	1.93612	967.213	-2.51327	73.6377	0	0	NA	NA	NA	NA	0	NA	NA	NA	9.94155e-06	4100684	1.31356	NA	NA
2021-03-18 19:30:00	OP-200m	UA-100m	MC	451.591	50.357	11.7622	1.68736	0.0942874	4.4	0.01626	3.631	3.086	1.715	9.004	0.08	1.7845	56.7893	1.93612	967.213	-2.51327	73.6377	0	0	NA	NA	NA	NA	0	NA	NA	NA	8.89727e-06	3474031	1.32121	NA	NA
2021-03-18 19:30:00	OP-50m	UA-100m	MC	451.591	50.357	11.7622	1.68736	0.0942874	4.4	0.01626	3.631	3.086	1.715	9.004	0.08	1.7845	56.7893	1.93612	967.213	-2.51327	73.6377	0	0	NA	NA	NA	NA	0	NA	NA	NA	1.28372e-05	6454893	1.33674	NA	NA
2021-03-18 19:30:00	OP-UW	UA-100m	MC	451.591	50.357	11.7622	1.68736	0.0942874	4.4	0.01626	3.631	3.086	1.715	9.004	0.08	1.7845	56.7893	1.93612	967.213	-2.51327	73.6377	0	0	NA	NA	NA	NA	0	NA	NA	NA	NA	0	1.32657	NA	NA
2021-03-18 19:30:00	OP-100m	UA-150m	MC	451.591	51.553	9.9484	1.78463	0.123715	8.2	0.02215	2.776	2.218	1.228	4.266	0.08	1.7845	56.7893	1.93612	967.213	-2.51327	73.6377	0	0	NA	NA	NA	NA	0	NA	NA	NA	9.78906e-06	3786883	1.3382	NA	NA
2021-03-18 19:30:00	OP-150m	UA-150m	MC	451.591	51.553	9.9484	1.78463	0.123715	8.2	0.02215	2.776	2.218	1.228	4.266	0.08	1.7845	56.7893	1.93612	967.213	-2.51327	73.6377	0	0	NA	NA	NA	NA	0	NA	NA	NA	9.30121e-06	3064103	1.31356	NA	NA
2021-03-18 19:30:00	OP-200m	UA-150m	MC	451.591	51.553	9.9484	1.78463	0.123715	8.2	0.02215	2.776	2.218	1.228	4.266	0.08	1.7845	56.7893	1.93612	967.213	-2.51327	73.6377	0	0	NA	NA	NA	NA	0	NA	NA	NA	8.71609e-06	2561133	1.32121	NA	NA
2021-03-18 19:30:00	OP-50m	UA-150m	MC	451.591	51.553	9.9484	1.78463	0.123715	8.2	0.02215	2.776	2.218	1.228	4.266	0.08	1.7845	56.7893	1.93612	967.213	-2.51327	73.6377	0	0	NA	NA	NA	NA	0	NA	NA	NA	1.13569e-05	5135297	1.33674	NA	NA
2021-03-18 19:30:00	OP-UW	UA-150m	MC	451.591	51.553	9.9484	1.78463	0.123715	8.2	0.02215	2.776	2.218	1.228	4.266	0.08	1.7845	56.7893	1.93612	967.213	-2.51327	73.6377	0	0	NA	NA	NA	NA	0	NA	NA	NA	NA	0	1.32657	NA	NA
2021-03-18 19:40:00	OP-100m	UA-UW	MC	451.591	37.382	23.95	0.584306	0.0797097	13.2	0.2094	3.716	3.096	1.256	4.444	0.2	1.60857	55.0503	1.55676	967.163	-2.46327	74.5143	0	0	NA	NA	NA	NA	0	NA	NA	NA	1.31222e-05	3573378	1.33967	NA	NA
2021-03-18 19:40:00	OP-150m	UA-UW	MC	451.591	37.382	23.95	0.584306	0.0797097	13.2	0.2094	3.716	3.096	1.256	4.444	0.2	1.60857	55.0503	1.55676	967.163	-2.46327	74.5143	0	0	NA	NA	NA	NA	0	NA	NA	NA	1.31465e-05	2579249	1.31438	NA	NA
2021-03-18 19:40:00	OP-200m	UA-UW	MC	451.591	37.382	23.95	0.584306	0.0797097	13.2	0.2094	3.716	3.096	1.256	4.444	0.2	1.60857	55.0503	1.55676	967.163	-2.46327	74.5143	0	0	NA	NA	NA	NA	0	NA	NA	NA	1.02502e-05	1914930	1.31885	NA	NA
2021-03-18 19:40:00	OP-50m	UA-UW	MC	451.591	37.382	23.95	0.584306	0.0797097	13.2	0.2094	3.716	3.096	1.256	4.444	0.2	1.60857	55.0503	1.55676	967.163	-2.46327	74.5143	0	0	NA	NA	NA	NA	0	NA	NA	NA	2.04002e-05	5523730	1.33584	NA	NA
2021-03-18 19:40:00	OP-UW	UA-UW	MC	451.591	37.382	23.95	0.584306	0.0797097	13.2	0.2094	3.716	3.096	1.256	4.444	0.2	1.60857	55.0503	1.55676	967.163	-2.46327	74.5143	0	0	NA	NA	NA	NA	0	NA	NA	NA	NA	0	1.32955	NA	NA
2021-03-18 19:40:00	OP-100m	UA-100m	MC	451.591	46.264	10.2651	0.965257	0.0488026	2.7	0.03224	3.442	3.207	1.935	12.419	0.08	1.60857	55.0503	1.55676	967.163	-2.46327	74.5143	0	0	NA	NA	NA	NA	0	NA	NA	NA	2.05312e-05	5976187	1.33967	NA	NA
2021-03-18 19:40:00	OP-150m	UA-100m	MC	451.591	46.264	10.2651	0.965257	0.0488026	2.7	0.03224	3.442	3.207	1.935	12.419	0.08	1.60857	55.0503	1.55676	967.163	-2.46327	74.5143	0	0	NA	NA	NA	NA	0	NA	NA	NA	1.97777e-05	4967034	1.31438	NA	NA
2021-03-18 19:40:00	OP-200m	UA-100m	MC	451.591	46.264	10.2651	0.965257	0.0488026	2.7	0.03224	3.442	3.207	1.935	12.419	0.08	1.60857	55.0503	1.55676	967.163	-2.46327	74.5143	0	0	NA	NA	NA	NA	0	NA	NA	NA	2.03578e-05	4231504	1.31885	NA	NA
2021-03-18 19:40:00	OP-50m	UA-100m	MC	451.591	46.264	10.2651	0.965257	0.0488026	2.7	0.03224	3.442	3.207	1.935	12.419	0.08	1.60857	55.0503	1.55676	967.163	-2.46327	74.5143	0	0	NA	NA	NA	NA	0	NA	NA	NA	2.45e-05	7732582	1.33584	NA	NA
2021-03-18 19:40:00	OP-UW	UA-100m	MC	451.591	46.264	10.2651	0.965257	0.0488026	2.7	0.03224	3.442	3.207	1.935	12.419	0.08	1.60857	55.0503	1.55676	967.163	-2.46327	74.5143	0	0	NA	NA	NA	NA	0	NA	NA	NA	NA	0	1.32955	NA	NA
2021-03-18 19:40:00	OP-100m	UA-150m	MC	451.591	47.078	8.20508	1.07279	0.0530267	1.9	0.1093	3.258	2.612	1.66	8.283	0.08	1.60857	55.0503	1.55676	967.163	-2.46327	74.5143	0	0	NA	NA	NA	NA	0	NA	NA	NA	2.26162e-05	6395732	1.33967	NA	NA
2021-03-18 19:40:00	OP-150m	UA-150m	MC	451.591	47.078	8.20508	1.07279	0.0530267	1.9	0.1093	3.258	2.612	1.66	8.283	0.08	1.60857	55.0503	1.55676	967.163	-2.46327	74.5143	0	0	NA	NA	NA	NA	0	NA	NA	NA	2.09866e-05	5294064	1.31438	NA	NA
2021-03-18 19:40:00	OP-200m	UA-150m	MC	451.591	47.078	8.20508	1.07279	0.0530267	1.9	0.1093	3.258	2.612	1.66	8.283	0.08	1.60857	55.0503	1.55676	967.163	-2.46327	74.5143	0	0	NA	NA	NA	NA	0	NA	NA	NA	1.87809e-05	4591472	1.31885	NA	NA
2021-03-18 19:40:00	OP-50m	UA-150m	MC	451.591	47.078	8.20508	1.07279	0.0530267	1.9	0.1093	3.258	2.612	1.66	8.283	0.08	1.60857	55.0503	1.55676	967.163	-2.46327	74.5143	0	0	NA	NA	NA	NA	0	NA	NA	NA	2.72073e-05	8223876	1.33584	NA	NA
2021-03-18 19:40:00	OP-UW	UA-150m	MC	451.591	47.078	8.20508	1.07279	0.0530267	1.9	0.1093	3.258	2.612	1.66	8.283	0.08	1.60857	55.0503	1.55676	967.163	-2.46327	74.5143	0	0	NA	NA	NA	NA	0	NA	NA	NA	NA	0	1.32955	NA	NA
2021-03-18 19:50:00	OP-100m	UA-UW	MC	451.591	80.455	8.78132	0.967487	0.0290373	3.4	5.638e-05	4.139	3.336	1.92	12.158	0.2	1.40919	59.0147	0.933882	967.1	-2.4	75.7439	0	0	NA	NA	NA	NA	0	NA	NA	NA	7.0779e-07	9478	1.34074	NA	NA
2021-03-18 19:50:00	OP-150m	UA-UW	MC	451.591	80.455	8.78132	0.967487	0.0290373	3.4	5.638e-05	4.139	3.336	1.92	12.158	0.2	1.40919	59.0147	0.933882	967.1	-2.4	75.7439	0	0	NA	NA	NA	NA	0	NA	NA	NA	NA	0	1.31587	NA	NA
2021-03-18 19:50:00	OP-200m	UA-UW	MC	451.591	80.455	8.78132	0.967487	0.0290373	3.4	5.638e-05	4.139	3.336	1.92	12.158	0.2	1.40919	59.0147	0.933882	967.1	-2.4	75.7439	0	0	NA	NA	NA	NA	0	NA	NA	NA	NA	0	1.31829	NA	NA
2021-03-18 19:50:00	OP-50m	UA-UW	MC	451.591	80.455	8.78132	0.967487	0.0290373	3.4	5.638e-05	4.139	3.336	1.92	12.158	0.2	1.40919	59.0147	0.933882	967.1	-2.4	75.7439	0	0	NA	NA	NA	NA	0	NA	NA	NA	3.25806e-05	3823740	1.33539	NA	NA
2021-03-18 19:50:00	OP-UW	UA-UW	MC	451.591	80.455	8.78132	0.967487	0.0290373	3.4	5.638e-05	4.139	3.336	1.92	12.158	0.2	1.40919	59.0147	0.933882	967.1	-2.4	75.7439	0	0	NA	NA	NA	NA	0	NA	NA	NA	NA	0	1.33409	NA	NA
2021-03-18 19:50:00	OP-100m	UA-100m	MC	451.591	74.964	13.0997	0.965139	0.0310494	4.7	5.638e-05	3.449	3.039	1.507	6.538	0.08	1.40919	59.0147	0.933882	967.1	-2.4	75.7439	0	0	NA	NA	NA	NA	0	NA	NA	NA	1.06768e-05	510517	1.34074	NA	NA
2021-03-18 19:50:00	OP-150m	UA-100m	MC	451.591	74.964	13.0997	0.965139	0.0310494	4.7	5.638e-05	3.449	3.039	1.507	6.538	0.08	1.40919	59.0147	0.933882	967.1	-2.4	75.7439	0	0	NA	NA	NA	NA	0	NA	NA	NA	6.29408e-08	236	1.31587	NA	NA
2021-03-18 19:50:00	OP-200m	UA-100m	MC	451.591	74.964	13.0997	0.965139	0.0310494	4.7	5.638e-05	3.449	3.039	1.507	6.538	0.08	1.40919	59.0147	0.933882	967.1	-2.4	75.7439	0	0	NA	NA	NA	NA	0	NA	NA	NA	NA	0	1.31829	NA	NA
2021-03-18 19:50:00	OP-50m	UA-100m	MC	451.591	74.964	13.0997	0.965139	0.0310494	4.7	5.638e-05	3.449	3.039	1.507	6.538	0.08	1.40919	59.0147	0.933882	967.1	-2.4	75.7439	0	0	NA	NA	NA	NA	0	NA	NA	NA	4.01846e-05	3509535	1.33539	NA	NA
2021-03-18 19:50:00	OP-UW	UA-100m	MC	451.591	74.964	13.0997	0.965139	0.0310494	4.7	5.638e-05	3.449	3.039	1.507	6.538	0.08	1.40919	59.0147	0.933882	967.1	-2.4	75.7439	0	0	NA	NA	NA	NA	0	NA	NA	NA	NA	0	1.33409	NA	NA
2021-03-18 20:00:00	OP-100m	UA-UW	MC	451.591	67.83	9.82926	0.892877	0.0112477	0.9	5.638e-05	6.304	7.571	2.348	21.393	0.2	1.19184	75.3854	0.868575	967.013	-2.4	77.2377	0	0	NA	NA	NA	NA	0	NA	NA	NA	5.7963e-05	2492298	1.34302	NA	NA
2021-03-18 20:00:00	OP-150m	UA-UW	MC	451.591	67.83	9.82926	0.892877	0.0112477	0.9	5.638e-05	6.304	7.571	2.348	21.393	0.2	1.19184	75.3854	0.868575	967.013	-2.4	77.2377	0	0	NA	NA	NA	NA	0	NA	NA	NA	2.79581e-05	687572	1.31878	NA	NA
2021-03-18 20:00:00	OP-200m	UA-UW	MC	451.591	67.83	9.82926	0.892877	0.0112477	0.9	5.638e-05	6.304	7.571	2.348	21.393	0.2	1.19184	75.3854	0.868575	967.013	-2.4	77.2377	0	0	NA	NA	NA	NA	0	NA	NA	NA	6.87641e-06	67057	1.32311	NA	NA
2021-03-18 20:00:00	OP-50m	UA-UW	MC	451.591	67.83	9.82926	0.892877	0.0112477	0.9	5.638e-05	6.304	7.571	2.348	21.393	0.2	1.19184	75.3854	0.868575	967.013	-2.4	77.2377	0	0	NA	NA	NA	NA	0	NA	NA	NA	6.03786e-05	2338890	1.33758	NA	NA
2021-03-18 20:00:00	OP-UW	UA-UW	MC	451.591	67.83	9.82926	0.892877	0.0112477	0.9	5.638e-05	6.304	7.571	2.348	21.393	0.2	1.19184	75.3854	0.868575	967.013	-2.4	77.2377	0	0	NA	NA	NA	NA	0	NA	NA	NA	NA	0	1.34182	NA	NA
2021-03-18 20:00:00	OP-100m	UA-100m	MC	451.591	69.688	9.53358	1.03341	0.01211	2.6	5.638e-05	5.705	7.032	2.105	15.684	0.08	1.19184	75.3854	0.868575	967.013	-2.4	77.2377	0	0	NA	NA	NA	NA	0	NA	NA	NA	5.73655e-05	2403390	1.34302	NA	NA
2021-03-18 20:00:00	OP-150m	UA-100m	MC	451.591	69.688	9.53358	1.03341	0.01211	2.6	5.638e-05	5.705	7.032	2.105	15.684	0.08	1.19184	75.3854	0.868575	967.013	-2.4	77.2377	0	0	NA	NA	NA	NA	0	NA	NA	NA	2.91937e-05	717588	1.31878	NA	NA
2021-03-18 20:00:00	OP-200m	UA-100m	MC	451.591	69.688	9.53358	1.03341	0.01211	2.6	5.638e-05	5.705	7.032	2.105	15.684	0.08	1.19184	75.3854	0.868575	967.013	-2.4	77.2377	0	0	NA	NA	NA	NA	0	NA	NA	NA	1.34494e-05	157988	1.32311	NA	NA
2021-03-18 20:00:00	OP-50m	UA-100m	MC	451.591	69.688	9.53358	1.03341	0.01211	2.6	5.638e-05	5.705	7.032	2.105	15.684	0.08	1.19184	75.3854	0.868575	967.013	-2.4	77.2377	0	0	NA	NA	NA	NA	0	NA	NA	NA	8.3704e-05	4361266	1.33758	NA	NA
2021-03-18 20:00:00	OP-UW	UA-100m	MC	451.591	69.688	9.53358	1.03341	0.01211	2.6	5.638e-05	5.705	7.032	2.105	15.684	0.08	1.19184	75.3854	0.868575	967.013	-2.4	77.2377	0	0	NA	NA	NA	NA	0	NA	NA	NA	NA	0	1.34182	NA	NA
2021-03-18 20:10:00	OP-100m	UA-UW	MC	451.591	59.814	7.04403	0.792897	0.0093187	0.5	5.638e-05	7.247	10.318	2.04	14.368	0.2	1.1	64.064	0.78	966.963	-2.31327	77.7867	0	0	NA	NA	NA	NA	0	NA	NA	NA	4.95632e-05	868812	1.34253	NA	NA
2021-03-18 20:10:00	OP-150m	UA-UW	MC	451.591	59.814	7.04403	0.792897	0.0093187	0.5	5.638e-05	7.247	10.318	2.04	14.368	0.2	1.1	64.064	0.78	966.963	-2.31327	77.7867	0	0	NA	NA	NA	NA	0	NA	NA	NA	5.6605e-05	1135952	1.31905	NA	NA
2021-03-18 20:10:00	OP-200m	UA-UW	MC	451.591	59.814	7.04403	0.792897	0.0093187	0.5	5.638e-05	7.247	10.318	2.04	14.368	0.2	1.1	64.064	0.78	966.963	-2.31327	77.7867	0	0	NA	NA	NA	NA	0	NA	NA	NA	5.00714e-05	979249	1.31646	NA	NA
2021-03-18 20:10:00	OP-50m	UA-UW	MC	451.591	59.814	7.04403	0.792897	0.0093187	0.5	5.638e-05	7.247	10.318	2.04	14.368	0.2	1.1	64.064	0.78	966.963	-2.31327	77.7867	0	0	NA	NA	NA	NA	0	NA	NA	NA	2.4026e-05	236406	1.33782	NA	NA
2021-03-18 20:10:00	OP-UW	UA-UW	MC	451.591	59.814	7.04403	0.792897	0.0093187	0.5	5.638e-05	7.247	10.318	2.04	14.368	0.2	1.1	64.064	0.78	966.963	-2.31327	77.7867	0	0	NA	NA	NA	NA	0	NA	NA	NA	NA	0	1.33729	NA	NA
2021-03-18 20:20:00	OP-100m	UA-UW	MC	451.591	57.895	18.5642	0.654217	0.0311527	-2	0.0001571	3.187	8.993	1.348	2.86	0.2	1.11735	59.8712	0.713268	966.9	-2.3	77.9571	0	0	NA	NA	NA	NA	0	NA	NA	NA	2.86789e-05	674755	1.34242	NA	NA
2021-03-18 20:20:00	OP-150m	UA-UW	MC	451.591	57.895	18.5642	0.654217	0.0311527	-2	0.0001571	3.187	8.993	1.348	2.86	0.2	1.11735	59.8712	0.713268	966.9	-2.3	77.9571	0	0	NA	NA	NA	NA	0	NA	NA	NA	2.37175e-05	351322	1.32026	NA	NA
2021-03-18 20:20:00	OP-200m	UA-UW	MC	451.591	57.895	18.5642	0.654217	0.0311527	-2	0.0001571	3.187	8.993	1.348	2.86	0.2	1.11735	59.8712	0.713268	966.9	-2.3	77.9571	0	0	NA	NA	NA	NA	0	NA	NA	NA	1.68047e-05	194121	1.32507	NA	NA
2021-03-18 20:20:00	OP-50m	UA-UW	MC	451.591	57.895	18.5642	0.654217	0.0311527	-2	0.0001571	3.187	8.993	1.348	2.86	0.2	1.11735	59.8712	0.713268	966.9	-2.3	77.9571	0	0	NA	NA	NA	NA	0	NA	NA	NA	4.40655e-05	1437791	1.33809	NA	NA
2021-03-18 20:20:00	OP-UW	UA-UW	MC	451.591	57.895	18.5642	0.654217	0.0311527	-2	0.0001571	3.187	8.993	1.348	2.86	0.2	1.11735	59.8712	0.713268	966.9	-2.3	77.9571	0	0	NA	NA	NA	NA	0	NA	NA	NA	NA	0	1.34301	NA	NA
2021-03-18 20:20:00	OP-100m	UA-100m	MC	451.591	58.282	17.4182	0.718694	0.0587558	18.4	0.02717	2.865	4.125	0.977	3.13	0.08	1.11735	59.8712	0.713268	966.9	-2.3	77.9571	0	0	NA	NA	NA	NA	0	NA	NA	NA	2.14424e-05	2388073	1.34242	NA	NA
2021-03-18 20:20:00	OP-150m	UA-100m	MC	451.591	58.282	17.4182	0.718694	0.0587558	18.4	0.02717	2.865	4.125	0.977	3.13	0.08	1.11735	59.8712	0.713268	966.9	-2.3	77.9571	0	0	NA	NA	NA	NA	0	NA	NA	NA	1.71281e-05	1551192	1.32026	NA	NA
2021-03-18 20:20:00	OP-200m	UA-100m	MC	451.591	58.282	17.4182	0.718694	0.0587558	18.4	0.02717	2.865	4.125	0.977	3.13	0.08	1.11735	59.8712	0.713268	966.9	-2.3	77.9571	0	0	NA	NA	NA	NA	0	NA	NA	NA	1.43729e-05	1043806	1.32507	NA	NA
2021-03-18 20:20:00	OP-50m	UA-100m	MC	451.591	58.282	17.4182	0.718694	0.0587558	18.4	0.02717	2.865	4.125	0.977	3.13	0.08	1.11735	59.8712	0.713268	966.9	-2.3	77.9571	0	0	NA	NA	NA	NA	0	NA	NA	NA	2.73033e-05	4076976	1.33809	NA	NA
2021-03-18 20:20:00	OP-UW	UA-100m	MC	451.591	58.282	17.4182	0.718694	0.0587558	18.4	0.02717	2.865	4.125	0.977	3.13	0.08	1.11735	59.8712	0.713268	966.9	-2.3	77.9571	0	0	NA	NA	NA	NA	0	NA	NA	NA	NA	0	1.34301	NA	NA
2021-03-18 20:20:00	OP-100m	UA-150m	MC	451.591	59.158	17.2979	0.776637	0.0277903	12	5.638e-05	4.147	8.765	1.459	6.066	0.08	1.11735	59.8712	0.713268	966.9	-2.3	77.9571	0	0	NA	NA	NA	NA	0	NA	NA	NA	3.62012e-05	2113520	1.34242	NA	NA
2021-03-18 20:20:00	OP-150m	UA-150m	MC	451.591	59.158	17.2979	0.776637	0.0277903	12	5.638e-05	4.147	8.765	1.459	6.066	0.08	1.11735	59.8712	0.713268	966.9	-2.3	77.9571	0	0	NA	NA	NA	NA	0	NA	NA	NA	2.97517e-05	1422278	1.32026	NA	NA
2021-03-18 20:20:00	OP-200m	UA-150m	MC	451.591	59.158	17.2979	0.776637	0.0277903	12	5.638e-05	4.147	8.765	1.459	6.066	0.08	1.11735	59.8712	0.713268	966.9	-2.3	77.9571	0	0	NA	NA	NA	NA	0	NA	NA	NA	2.33092e-05	986850	1.32507	NA	NA
2021-03-18 20:20:00	OP-50m	UA-150m	MC	451.591	59.158	17.2979	0.776637	0.0277903	12	5.638e-05	4.147	8.765	1.459	6.066	0.08	1.11735	59.8712	0.713268	966.9	-2.3	77.9571	0	0	NA	NA	NA	NA	0	NA	NA	NA	4.34403e-05	3009871	1.33809	NA	NA
2021-03-18 20:20:00	OP-UW	UA-150m	MC	451.591	59.158	17.2979	0.776637	0.0277903	12	5.638e-05	4.147	8.765	1.459	6.066	0.08	1.11735	59.8712	0.713268	966.9	-2.3	77.9571	0	0	NA	NA	NA	NA	0	NA	NA	NA	NA	0	1.34301	NA	NA
2021-03-18 20:30:00	OP-100m	UA-100m	MC	451.591	11.098	31.538	0.741221	0.0531806	39	0.01033	6.318	4.814	0.843	2.857	0.08	0.779608	30.0328	0.746732	966.863	-2.12654	81.7366	0	0	NA	NA	NA	NA	0	NA	NA	NA	1.88206e-05	992101	1.35648	NA	NA
2021-03-18 20:30:00	OP-150m	UA-100m	MC	451.591	11.098	31.538	0.741221	0.0531806	39	0.01033	6.318	4.814	0.843	2.857	0.08	0.779608	30.0328	0.746732	966.863	-2.12654	81.7366	0	0	NA	NA	NA	NA	0	NA	NA	NA	1.19439e-05	432532	1.32977	NA	NA
2021-03-18 20:30:00	OP-200m	UA-100m	MC	451.591	11.098	31.538	0.741221	0.0531806	39	0.01033	6.318	4.814	0.843	2.857	0.08	0.779608	30.0328	0.746732	966.863	-2.12654	81.7366	0	0	NA	NA	NA	NA	0	NA	NA	NA	8.3786e-06	211692	1.33243	NA	NA
2021-03-18 20:30:00	OP-50m	UA-100m	MC	451.591	11.098	31.538	0.741221	0.0531806	39	0.01033	6.318	4.814	0.843	2.857	0.08	0.779608	30.0328	0.746732	966.863	-2.12654	81.7366	0	0	NA	NA	NA	NA	0	NA	NA	NA	2.95758e-05	2476699	1.35086	NA	NA
2021-03-18 20:30:00	OP-UW	UA-100m	MC	451.591	11.098	31.538	0.741221	0.0531806	39	0.01033	6.318	4.814	0.843	2.857	0.08	0.779608	30.0328	0.746732	966.863	-2.12654	81.7366	0	0	NA	NA	NA	NA	0	NA	NA	NA	9.64017e-08	95	1.36939	NA	NA
2021-03-18 20:40:00	OP-100m	UA-UW	MC	451.591	12.239	13.5659	1.02659	0.0406029	1.9	0.01486	4.235	5.045	1.149	3.82	0.2	0.257765	29.141	0.356145	966.8	-2.06327	84.8948	0	0	NA	NA	NA	NA	0	NA	NA	NA	1.50837e-05	1021018	1.36135	NA	NA
2021-03-18 20:40:00	OP-150m	UA-UW	MC	451.591	12.239	13.5659	1.02659	0.0406029	1.9	0.01486	4.235	5.045	1.149	3.82	0.2	0.257765	29.141	0.356145	966.8	-2.06327	84.8948	0	0	NA	NA	NA	NA	0	NA	NA	NA	5.73576e-06	180116	1.33583	NA	NA
2021-03-18 20:40:00	OP-200m	UA-UW	MC	451.591	12.239	13.5659	1.02659	0.0406029	1.9	0.01486	4.235	5.045	1.149	3.82	0.2	0.257765	29.141	0.356145	966.8	-2.06327	84.8948	0	0	NA	NA	NA	NA	0	NA	NA	NA	2.16579e-06	25769	1.33694	NA	NA
2021-03-18 20:40:00	OP-50m	UA-UW	MC	451.591	12.239	13.5659	1.02659	0.0406029	1.9	0.01486	4.235	5.045	1.149	3.82	0.2	0.257765	29.141	0.356145	966.8	-2.06327	84.8948	0	0	NA	NA	NA	NA	0	NA	NA	NA	3.21155e-05	3408513	1.36911	NA	NA
2021-03-18 20:40:00	OP-UW	UA-UW	MC	451.591	12.239	13.5659	1.02659	0.0406029	1.9	0.01486	4.235	5.045	1.149	3.82	0.2	0.257765	29.141	0.356145	966.8	-2.06327	84.8948	0	0	NA	NA	NA	NA	0	NA	NA	NA	NA	0	1.4107	NA	NA
2021-03-18 20:50:00	OP-100m	UA-UW	MC	451.591	87.296	38.3387	0.672855	0.0261769	-0.2	5.638e-05	3.524	19.579	2.053	2.899	0.2	0.031229	142.412	0.289777	966.8	-2	86.4071	0	0	NA	NA	NA	NA	0	NA	NA	NA	1.78196e-05	108982	1.36446	NA	NA
2021-03-18 20:50:00	OP-150m	UA-UW	MC	451.591	87.296	38.3387	0.672855	0.0261769	-0.2	5.638e-05	3.524	19.579	2.053	2.899	0.2	0.031229	142.412	0.289777	966.8	-2	86.4071	0	0	NA	NA	NA	NA	0	NA	NA	NA	1.4172e-05	47124	1.34315	NA	NA
2021-03-18 20:50:00	OP-200m	UA-UW	MC	451.591	87.296	38.3387	0.672855	0.0261769	-0.2	5.638e-05	3.524	19.579	2.053	2.899	0.2	0.031229	142.412	0.289777	966.8	-2	86.4071	0	0	NA	NA	NA	NA	0	NA	NA	NA	1.35593e-05	20361	1.33521	NA	NA
2021-03-18 20:50:00	OP-50m	UA-UW	MC	451.591	87.296	38.3387	0.672855	0.0261769	-0.2	5.638e-05	3.524	19.579	2.053	2.899	0.2	0.031229	142.412	0.289777	966.8	-2	86.4071	0	0	NA	NA	NA	NA	0	NA	NA	NA	3.17916e-05	329832	1.36454	NA	NA
2021-03-18 20:50:00	OP-UW	UA-UW	MC	451.591	87.296	38.3387	0.672855	0.0261769	-0.2	5.638e-05	3.524	19.579	2.053	2.899	0.2	0.031229	142.412	0.289777	966.8	-2	86.4071	0	0	NA	NA	NA	NA	0	NA	NA	NA	NA	0	1.39586	NA	NA
2021-03-18 21:00:00	OP-100m	UA-UW	MC	451.591	91.212	12.7471	0.934795	0.0518499	17.1	0.002661	4.193	3.111	0.817	2.831	0.2	-0.0867318	112.177	0.680615	966.8	-1.8398	88.0418	0	0	NA	NA	NA	NA	0	NA	NA	NA	2.22604e-06	18464	1.37294	NA	NA
2021-03-18 21:00:00	OP-150m	UA-UW	MC	451.591	91.212	12.7471	0.934795	0.0518499	17.1	0.002661	4.193	3.111	0.817	2.831	0.2	-0.0867318	112.177	0.680615	966.8	-1.8398	88.0418	0	0	NA	NA	NA	NA	0	NA	NA	NA	4.55198e-08	86	1.35361	NA	NA
2021-03-18 21:00:00	OP-200m	UA-UW	MC	451.591	91.212	12.7471	0.934795	0.0518499	17.1	0.002661	4.193	3.111	0.817	2.831	0.2	-0.0867318	112.177	0.680615	966.8	-1.8398	88.0418	0	0	NA	NA	NA	NA	0	NA	NA	NA	NA	0	1.34907	NA	NA
2021-03-18 21:00:00	OP-50m	UA-UW	MC	451.591	91.212	12.7471	0.934795	0.0518499	17.1	0.002661	4.193	3.111	0.817	2.831	0.2	-0.0867318	112.177	0.680615	966.8	-1.8398	88.0418	0	0	NA	NA	NA	NA	0	NA	NA	NA	1.91711e-05	1017519	1.36562	NA	NA
2021-03-18 21:00:00	OP-UW	UA-UW	MC	451.591	91.212	12.7471	0.934795	0.0518499	17.1	0.002661	4.193	3.111	0.817	2.831	0.2	-0.0867318	112.177	0.680615	966.8	-1.8398	88.0418	0	0	NA	NA	NA	NA	0	NA	NA	NA	NA	0	1.36655	NA	NA
2021-03-18 21:00:00	OP-100m	UA-100m	MC	451.591	94.4	19.6369	0.683375	0.0345054	4.3	0.008028	4.472	6.421	1.104	3.602	0.08	-0.0867318	112.177	0.680615	966.8	-1.8398	88.0418	0	0	NA	NA	NA	NA	0	NA	NA	NA	1.30559e-05	402725	1.37294	NA	NA
2021-03-18 21:00:00	OP-150m	UA-100m	MC	451.591	94.4	19.6369	0.683375	0.0345054	4.3	0.008028	4.472	6.421	1.104	3.602	0.08	-0.0867318	112.177	0.680615	966.8	-1.8398	88.0418	0	0	NA	NA	NA	NA	0	NA	NA	NA	6.9289e-06	89399	1.35361	NA	NA
2021-03-18 21:00:00	OP-200m	UA-100m	MC	451.591	94.4	19.6369	0.683375	0.0345054	4.3	0.008028	4.472	6.421	1.104	3.602	0.08	-0.0867318	112.177	0.680615	966.8	-1.8398	88.0418	0	0	NA	NA	NA	NA	0	NA	NA	NA	3.44553e-06	27773	1.34907	NA	NA
2021-03-18 21:00:00	OP-50m	UA-100m	MC	451.591	94.4	19.6369	0.683375	0.0345054	4.3	0.008028	4.472	6.421	1.104	3.602	0.08	-0.0867318	112.177	0.680615	966.8	-1.8398	88.0418	0	0	NA	NA	NA	NA	0	NA	NA	NA	2.93089e-05	1661631	1.36562	NA	NA
2021-03-18 21:00:00	OP-UW	UA-100m	MC	451.591	94.4	19.6369	0.683375	0.0345054	4.3	0.008028	4.472	6.421	1.104	3.602	0.08	-0.0867318	112.177	0.680615	966.8	-1.8398	88.0418	0	0	NA	NA	NA	NA	0	NA	NA	NA	NA	0	1.36655	NA	NA
2021-03-18 21:10:00	OP-100m	UA-UW	MC	451.591	89.752	10.0675	1.22393	0.0333706	1.5	0.0005448	4.479	2.88	1.718	9.044	0.2	-0.206117	99.5189	0.763464	966.713	-1.57654	90.5714	0	0	NA	NA	NA	NA	0	NA	NA	NA	NA	0	1.37512	NA	NA
2021-03-18 21:10:00	OP-150m	UA-UW	MC	451.591	89.752	10.0675	1.22393	0.0333706	1.5	0.0005448	4.479	2.88	1.718	9.044	0.2	-0.206117	99.5189	0.763464	966.713	-1.57654	90.5714	0	0	NA	NA	NA	NA	0	NA	NA	NA	NA	0	1.35171	NA	NA
2021-03-18 21:10:00	OP-200m	UA-UW	MC	451.591	89.752	10.0675	1.22393	0.0333706	1.5	0.0005448	4.479	2.88	1.718	9.044	0.2	-0.206117	99.5189	0.763464	966.713	-1.57654	90.5714	0	0	NA	NA	NA	NA	0	NA	NA	NA	NA	0	1.35748	NA	NA
2021-03-18 21:10:00	OP-50m	UA-UW	MC	451.591	89.752	10.0675	1.22393	0.0333706	1.5	0.0005448	4.479	2.88	1.718	9.044	0.2	-0.206117	99.5189	0.763464	966.713	-1.57654	90.5714	0	0	NA	NA	NA	NA	0	NA	NA	NA	1.01489e-05	967525	1.36941	NA	NA
2021-03-18 21:10:00	OP-UW	UA-UW	MC	451.591	89.752	10.0675	1.22393	0.0333706	1.5	0.0005448	4.479	2.88	1.718	9.044	0.2	-0.206117	99.5189	0.763464	966.713	-1.57654	90.5714	0	0	NA	NA	NA	NA	0	NA	NA	NA	NA	0	1.37556	NA	NA
2021-03-18 21:10:00	OP-100m	UA-100m	MC	451.591	94.683	12.8352	1.1166	0.0509559	4.3	0.003442	2.536	2.205	1.313	4.84	0.08	-0.206117	99.5189	0.763464	966.713	-1.57654	90.5714	0	0	NA	NA	NA	NA	0	NA	NA	NA	NA	0	1.37512	NA	NA
2021-03-18 21:10:00	OP-150m	UA-100m	MC	451.591	94.683	12.8352	1.1166	0.0509559	4.3	0.003442	2.536	2.205	1.313	4.84	0.08	-0.206117	99.5189	0.763464	966.713	-1.57654	90.5714	0	0	NA	NA	NA	NA	0	NA	NA	NA	NA	0	1.35171	NA	NA
2021-03-18 21:10:00	OP-200m	UA-100m	MC	451.591	94.683	12.8352	1.1166	0.0509559	4.3	0.003442	2.536	2.205	1.313	4.84	0.08	-0.206117	99.5189	0.763464	966.713	-1.57654	90.5714	0	0	NA	NA	NA	NA	0	NA	NA	NA	NA	0	1.35748	NA	NA
2021-03-18 21:10:00	OP-50m	UA-100m	MC	451.591	94.683	12.8352	1.1166	0.0509559	4.3	0.003442	2.536	2.205	1.313	4.84	0.08	-0.206117	99.5189	0.763464	966.713	-1.57654	90.5714	0	0	NA	NA	NA	NA	0	NA	NA	NA	2.96399e-06	173534	1.36941	NA	NA
2021-03-18 21:10:00	OP-UW	UA-100m	MC	451.591	94.683	12.8352	1.1166	0.0509559	4.3	0.003442	2.536	2.205	1.313	4.84	0.08	-0.206117	99.5189	0.763464	966.713	-1.57654	90.5714	0	0	NA	NA	NA	NA	0	NA	NA	NA	NA	0	1.37556	NA	NA
2021-03-18 21:10:00	OP-100m	UA-150m	MC	451.591	94.855	13.1857	1.10173	0.0479589	3.8	0.00303	2.816	2.262	1.399	5.525	0.08	-0.206117	99.5189	0.763464	966.713	-1.57654	90.5714	0	0	NA	NA	NA	NA	0	NA	NA	NA	NA	0	1.37512	NA	NA
2021-03-18 21:10:00	OP-150m	UA-150m	MC	451.591	94.855	13.1857	1.10173	0.0479589	3.8	0.00303	2.816	2.262	1.399	5.525	0.08	-0.206117	99.5189	0.763464	966.713	-1.57654	90.5714	0	0	NA	NA	NA	NA	0	NA	NA	NA	NA	0	1.35171	NA	NA
2021-03-18 21:10:00	OP-200m	UA-150m	MC	451.591	94.855	13.1857	1.10173	0.0479589	3.8	0.00303	2.816	2.262	1.399	5.525	0.08	-0.206117	99.5189	0.763464	966.713	-1.57654	90.5714	0	0	NA	NA	NA	NA	0	NA	NA	NA	NA	0	1.35748	NA	NA
2021-03-18 21:10:00	OP-50m	UA-150m	MC	451.591	94.855	13.1857	1.10173	0.0479589	3.8	0.00303	2.816	2.262	1.399	5.525	0.08	-0.206117	99.5189	0.763464	966.713	-1.57654	90.5714	0	0	NA	NA	NA	NA	0	NA	NA	NA	2.30438e-06	149749	1.36941	NA	NA
2021-03-18 21:10:00	OP-UW	UA-150m	MC	451.591	94.855	13.1857	1.10173	0.0479589	3.8	0.00303	2.816	2.262	1.399	5.525	0.08	-0.206117	99.5189	0.763464	966.713	-1.57654	90.5714	0	0	NA	NA	NA	NA	0	NA	NA	NA	NA	0	1.37556	NA	NA
2021-03-18 21:20:00	OP-100m	UA-UW	MC	451.591	74.138	5.23692	1.46979	0.0692132	8.5	0.001283	2.189	1.863	1.325	4.929	0.2	-0.139805	73.8795	0.922849	966.613	-1.78366	87.7726	0	0	NA	NA	NA	NA	0	NA	NA	NA	4.82997e-06	613988	1.40175	NA	NA
2021-03-18 21:20:00	OP-150m	UA-UW	MC	451.591	74.138	5.23692	1.46979	0.0692132	8.5	0.001283	2.189	1.863	1.325	4.929	0.2	-0.139805	73.8795	0.922849	966.613	-1.78366	87.7726	0	0	NA	NA	NA	NA	0	NA	NA	NA	4.50833e-09	8	1.3767	NA	NA
2021-03-18 21:20:00	OP-200m	UA-UW	MC	451.591	74.138	5.23692	1.46979	0.0692132	8.5	0.001283	2.189	1.863	1.325	4.929	0.2	-0.139805	73.8795	0.922849	966.613	-1.78366	87.7726	0	0	NA	NA	NA	NA	0	NA	NA	NA	NA	0	1.38001	NA	NA
2021-03-18 21:20:00	OP-50m	UA-UW	MC	451.591	74.138	5.23692	1.46979	0.0692132	8.5	0.001283	2.189	1.863	1.325	4.929	0.2	-0.139805	73.8795	0.922849	966.613	-1.78366	87.7726	0	0	NA	NA	NA	NA	0	NA	NA	NA	2.13423e-05	4328583	1.40518	NA	NA
2021-03-18 21:20:00	OP-UW	UA-UW	MC	451.591	74.138	5.23692	1.46979	0.0692132	8.5	0.001283	2.189	1.863	1.325	4.929	0.2	-0.139805	73.8795	0.922849	966.613	-1.78366	87.7726	0	0	NA	NA	NA	NA	0	NA	NA	NA	NA	0	1.41237	NA	NA
2021-03-18 21:20:00	OP-100m	UA-100m	MC	451.591	65.567	4.02423	1.22322	0.0477011	3.9	0.0009719	2.731	1.712	1.2	4.098	0.08	-0.139805	73.8795	0.922849	966.613	-1.78366	87.7726	0	0	NA	NA	NA	NA	0	NA	NA	NA	2.94439e-05	3215381	1.40175	NA	NA
2021-03-18 21:20:00	OP-150m	UA-100m	MC	451.591	65.567	4.02423	1.22322	0.0477011	3.9	0.0009719	2.731	1.712	1.2	4.098	0.08	-0.139805	73.8795	0.922849	966.613	-1.78366	87.7726	0	0	NA	NA	NA	NA	0	NA	NA	NA	8.37079e-06	668797	1.3767	NA	NA
2021-03-18 21:20:00	OP-200m	UA-100m	MC	451.591	65.567	4.02423	1.22322	0.0477011	3.9	0.0009719	2.731	1.712	1.2	4.098	0.08	-0.139805	73.8795	0.922849	966.613	-1.78366	87.7726	0	0	NA	NA	NA	NA	0	NA	NA	NA	1.48045e-07	309	1.38001	NA	NA
2021-03-18 21:20:00	OP-50m	UA-100m	MC	451.591	65.567	4.02423	1.22322	0.0477011	3.9	0.0009719	2.731	1.712	1.2	4.098	0.08	-0.139805	73.8795	0.922849	966.613	-1.78366	87.7726	0	0	NA	NA	NA	NA	0	NA	NA	NA	3.08666e-05	3540789	1.40518	NA	NA
2021-03-18 21:20:00	OP-UW	UA-100m	MC	451.591	65.567	4.02423	1.22322	0.0477011	3.9	0.0009719	2.731	1.712	1.2	4.098	0.08	-0.139805	73.8795	0.922849	966.613	-1.78366	87.7726	0	0	NA	NA	NA	NA	0	NA	NA	NA	NA	0	1.41237	NA	NA
2021-03-18 21:20:00	OP-100m	UA-150m	MC	451.591	63.973	4.67359	1.18249	0.0526836	3.5	0.004601	2.24	1.828	1.334	4.998	0.08	-0.139805	73.8795	0.922849	966.613	-1.78366	87.7726	0	0	NA	NA	NA	NA	0	NA	NA	NA	2.44882e-05	4115848	1.40175	NA	NA
2021-03-18 21:20:00	OP-150m	UA-150m	MC	451.591	63.973	4.67359	1.18249	0.0526836	3.5	0.004601	2.24	1.828	1.334	4.998	0.08	-0.139805	73.8795	0.922849	966.613	-1.78366	87.7726	0	0	NA	NA	NA	NA	0	NA	NA	NA	1.28263e-05	1632122	1.3767	NA	NA
2021-03-18 21:20:00	OP-200m	UA-150m	MC	451.591	63.973	4.67359	1.18249	0.0526836	3.5	0.004601	2.24	1.828	1.334	4.998	0.08	-0.139805	73.8795	0.922849	966.613	-1.78366	87.7726	0	0	NA	NA	NA	NA	0	NA	NA	NA	6.20505e-07	23128	1.38001	NA	NA
2021-03-18 21:20:00	OP-50m	UA-150m	MC	451.591	63.973	4.67359	1.18249	0.0526836	3.5	0.004601	2.24	1.828	1.334	4.998	0.08	-0.139805	73.8795	0.922849	966.613	-1.78366	87.7726	0	0	NA	NA	NA	NA	0	NA	NA	NA	2.76384e-05	4776018	1.40518	NA	NA
2021-03-18 21:20:00	OP-UW	UA-150m	MC	451.591	63.973	4.67359	1.18249	0.0526836	3.5	0.004601	2.24	1.828	1.334	4.998	0.08	-0.139805	73.8795	0.922849	966.613	-1.78366	87.7726	0	0	NA	NA	NA	NA	0	NA	NA	NA	NA	0	1.41237	NA	NA
2021-03-18 21:30:00	OP-100m	UA-UW	MC	451.591	64.49	13.076	0.790151	0.0400165	3.9	0.008743	4.272	4.247	1.4	5.533	0.2	0.161424	70.1607	0.967152	966.513	-2.05	85.0571	0	0	NA	NA	NA	NA	0	NA	NA	NA	2.82233e-05	3479595	1.45953	NA	NA
2021-03-18 21:30:00	OP-150m	UA-UW	MC	451.591	64.49	13.076	0.790151	0.0400165	3.9	0.008743	4.272	4.247	1.4	5.533	0.2	0.161424	70.1607	0.967152	966.513	-2.05	85.0571	0	0	NA	NA	NA	NA	0	NA	NA	NA	1.97823e-05	1694614	1.4358	NA	NA
2021-03-18 21:30:00	OP-200m	UA-UW	MC	451.591	64.49	13.076	0.790151	0.0400165	3.9	0.008743	4.272	4.247	1.4	5.533	0.2	0.161424	70.1607	0.967152	966.513	-2.05	85.0571	0	0	NA	NA	NA	NA	0	NA	NA	NA	1.04719e-05	661067	1.4412	NA	NA
2021-03-18 21:30:00	OP-50m	UA-UW	MC	451.591	64.49	13.076	0.790151	0.0400165	3.9	0.008743	4.272	4.247	1.4	5.533	0.2	0.161424	70.1607	0.967152	966.513	-2.05	85.0571	0	0	NA	NA	NA	NA	0	NA	NA	NA	3.47264e-05	5328243	1.4497	NA	NA
2021-03-18 21:30:00	OP-UW	UA-UW	MC	451.591	64.49	13.076	0.790151	0.0400165	3.9	0.008743	4.272	4.247	1.4	5.533	0.2	0.161424	70.1607	0.967152	966.513	-2.05	85.0571	0	0	NA	NA	NA	NA	0	NA	NA	NA	NA	0	1.39395	NA	NA
2021-03-18 21:30:00	OP-100m	UA-100m	MC	451.591	73.829	9.16255	0.88411	0.0525654	4.3	0.02539	2.479	2.095	1.31	4.818	0.08	0.161424	70.1607	0.967152	966.513	-2.05	85.0571	0	0	NA	NA	NA	NA	0	NA	NA	NA	8.50799e-06	1061102	1.45953	NA	NA
2021-03-18 21:30:00	OP-150m	UA-100m	MC	451.591	73.829	9.16255	0.88411	0.0525654	4.3	0.02539	2.479	2.095	1.31	4.818	0.08	0.161424	70.1607	0.967152	966.513	-2.05	85.0571	0	0	NA	NA	NA	NA	0	NA	NA	NA	6.03246e-08	384	1.4358	NA	NA
2021-03-18 21:30:00	OP-200m	UA-100m	MC	451.591	73.829	9.16255	0.88411	0.0525654	4.3	0.02539	2.479	2.095	1.31	4.818	0.08	0.161424	70.1607	0.967152	966.513	-2.05	85.0571	0	0	NA	NA	NA	NA	0	NA	NA	NA	NA	0	1.4412	NA	NA
2021-03-18 21:30:00	OP-50m	UA-100m	MC	451.591	73.829	9.16255	0.88411	0.0525654	4.3	0.02539	2.479	2.095	1.31	4.818	0.08	0.161424	70.1607	0.967152	966.513	-2.05	85.0571	0	0	NA	NA	NA	NA	0	NA	NA	NA	2.83326e-05	6060193	1.4497	NA	NA
2021-03-18 21:30:00	OP-UW	UA-100m	MC	451.591	73.829	9.16255	0.88411	0.0525654	4.3	0.02539	2.479	2.095	1.31	4.818	0.08	0.161424	70.1607	0.967152	966.513	-2.05	85.0571	0	0	NA	NA	NA	NA	0	NA	NA	NA	NA	0	1.39395	NA	NA
2021-03-18 21:30:00	OP-100m	UA-150m	MC	451.591	75.668	9.19408	1.07705	0.0474784	2.5	0.01397	3.522	2.612	1.47	6.171	0.08	0.161424	70.1607	0.967152	966.513	-2.05	85.0571	0	0	NA	NA	NA	NA	0	NA	NA	NA	7.6907e-06	572360	1.45953	NA	NA
2021-03-18 21:30:00	OP-150m	UA-150m	MC	451.591	75.668	9.19408	1.07705	0.0474784	2.5	0.01397	3.522	2.612	1.47	6.171	0.08	0.161424	70.1607	0.967152	966.513	-2.05	85.0571	0	0	NA	NA	NA	NA	0	NA	NA	NA	NA	0	1.4358	NA	NA
2021-03-18 21:30:00	OP-200m	UA-150m	MC	451.591	75.668	9.19408	1.07705	0.0474784	2.5	0.01397	3.522	2.612	1.47	6.171	0.08	0.161424	70.1607	0.967152	966.513	-2.05	85.0571	0	0	NA	NA	NA	NA	0	NA	NA	NA	NA	0	1.4412	NA	NA
2021-03-18 21:30:00	OP-50m	UA-150m	MC	451.591	75.668	9.19408	1.07705	0.0474784	2.5	0.01397	3.522	2.612	1.47	6.171	0.08	0.161424	70.1607	0.967152	966.513	-2.05	85.0571	0	0	NA	NA	NA	NA	0	NA	NA	NA	2.85067e-05	6075364	1.4497	NA	NA
2021-03-18 21:30:00	OP-UW	UA-150m	MC	451.591	75.668	9.19408	1.07705	0.0474784	2.5	0.01397	3.522	2.612	1.47	6.171	0.08	0.161424	70.1607	0.967152	966.513	-2.05	85.0571	0	0	NA	NA	NA	NA	0	NA	NA	NA	NA	0	1.39395	NA	NA
2021-03-18 21:40:00	OP-100m	UA-UW	MC	451.591	85.865	8.35654	1.24002	0.0668953	-144.6	0.00116	2.541	2.036	1.298	4.605	0.2	-0.0248873	83.7729	0.762039	966.5	-1.78981	88.5325	0	0	NA	NA	NA	NA	0	NA	NA	NA	7.3225e-08	550	1.43646	NA	NA
2021-03-18 21:40:00	OP-150m	UA-UW	MC	451.591	85.865	8.35654	1.24002	0.0668953	-144.6	0.00116	2.541	2.036	1.298	4.605	0.2	-0.0248873	83.7729	0.762039	966.5	-1.78981	88.5325	0	0	NA	NA	NA	NA	0	NA	NA	NA	NA	0	1.41621	NA	NA
2021-03-18 21:40:00	OP-200m	UA-UW	MC	451.591	85.865	8.35654	1.24002	0.0668953	-144.6	0.00116	2.541	2.036	1.298	4.605	0.2	-0.0248873	83.7729	0.762039	966.5	-1.78981	88.5325	0	0	NA	NA	NA	NA	0	NA	NA	NA	NA	0	1.43422	NA	NA
2021-03-18 21:40:00	OP-50m	UA-UW	MC	451.591	85.865	8.35654	1.24002	0.0668953	-144.6	0.00116	2.541	2.036	1.298	4.605	0.2	-0.0248873	83.7729	0.762039	966.5	-1.78981	88.5325	0	0	NA	NA	NA	NA	0	NA	NA	NA	1.23021e-05	1751753	1.42478	NA	NA
2021-03-18 21:40:00	OP-UW	UA-UW	MC	451.591	85.865	8.35654	1.24002	0.0668953	-144.6	0.00116	2.541	2.036	1.298	4.605	0.2	-0.0248873	83.7729	0.762039	966.5	-1.78981	88.5325	0	0	NA	NA	NA	NA	0	NA	NA	NA	NA	0	1.41076	NA	NA
2021-03-18 21:40:00	OP-100m	UA-100m	MC	451.591	91.215	8.36277	1.04602	0.0736992	7.8	0.0258	3.649	1.904	1.184	4.007	0.08	-0.0248873	83.7729	0.762039	966.5	-1.78981	88.5325	0	0	NA	NA	NA	NA	0	NA	NA	NA	NA	0	1.43646	NA	NA
2021-03-18 21:40:00	OP-150m	UA-100m	MC	451.591	91.215	8.36277	1.04602	0.0736992	7.8	0.0258	3.649	1.904	1.184	4.007	0.08	-0.0248873	83.7729	0.762039	966.5	-1.78981	88.5325	0	0	NA	NA	NA	NA	0	NA	NA	NA	NA	0	1.41621	NA	NA
2021-03-18 21:40:00	OP-200m	UA-100m	MC	451.591	91.215	8.36277	1.04602	0.0736992	7.8	0.0258	3.649	1.904	1.184	4.007	0.08	-0.0248873	83.7729	0.762039	966.5	-1.78981	88.5325	0	0	NA	NA	NA	NA	0	NA	NA	NA	NA	0	1.43422	NA	NA
2021-03-18 21:40:00	OP-50m	UA-100m	MC	451.591	91.215	8.36277	1.04602	0.0736992	7.8	0.0258	3.649	1.904	1.184	4.007	0.08	-0.0248873	83.7729	0.762039	966.5	-1.78981	88.5325	0	0	NA	NA	NA	NA	0	NA	NA	NA	6.82562e-06	991068	1.42478	NA	NA
2021-03-18 21:40:00	OP-UW	UA-100m	MC	451.591	91.215	8.36277	1.04602	0.0736992	7.8	0.0258	3.649	1.904	1.184	4.007	0.08	-0.0248873	83.7729	0.762039	966.5	-1.78981	88.5325	0	0	NA	NA	NA	NA	0	NA	NA	NA	NA	0	1.41076	NA	NA
2021-03-18 21:40:00	OP-100m	UA-150m	MC	451.591	99.548	8.44897	1.05949	0.0607522	7.5	0.007534	2.943	2.307	1.345	5.083	0.08	-0.0248873	83.7729	0.762039	966.5	-1.78981	88.5325	0	0	NA	NA	NA	NA	0	NA	NA	NA	NA	0	1.43646	NA	NA
2021-03-18 21:40:00	OP-150m	UA-150m	MC	451.591	99.548	8.44897	1.05949	0.0607522	7.5	0.007534	2.943	2.307	1.345	5.083	0.08	-0.0248873	83.7729	0.762039	966.5	-1.78981	88.5325	0	0	NA	NA	NA	NA	0	NA	NA	NA	NA	0	1.41621	NA	NA
2021-03-18 21:40:00	OP-200m	UA-150m	MC	451.591	99.548	8.44897	1.05949	0.0607522	7.5	0.007534	2.943	2.307	1.345	5.083	0.08	-0.0248873	83.7729	0.762039	966.5	-1.78981	88.5325	0	0	NA	NA	NA	NA	0	NA	NA	NA	NA	0	1.43422	NA	NA
2021-03-18 21:40:00	OP-50m	UA-150m	MC	451.591	99.548	8.44897	1.05949	0.0607522	7.5	0.007534	2.943	2.307	1.345	5.083	0.08	-0.0248873	83.7729	0.762039	966.5	-1.78981	88.5325	0	0	NA	NA	NA	NA	0	NA	NA	NA	9.51101e-07	24296	1.42478	NA	NA
2021-03-18 21:40:00	OP-UW	UA-150m	MC	451.591	99.548	8.44897	1.05949	0.0607522	7.5	0.007534	2.943	2.307	1.345	5.083	0.08	-0.0248873	83.7729	0.762039	966.5	-1.78981	88.5325	0	0	NA	NA	NA	NA	0	NA	NA	NA	NA	0	1.41076	NA	NA
2021-03-18 21:50:00	OP-100m	UA-UW	MC	451.591	79.96	11.3706	1.40287	0.0851805	17.5	0.004834	2.642	2.481	1.309	4.811	0.2	-0.262039	88.5194	0.737152	966.413	-1.78673	89.146	0	0	NA	NA	NA	NA	0	NA	NA	NA	2.4786e-06	106308	1.44529	NA	NA
2021-03-18 21:50:00	OP-150m	UA-UW	MC	451.591	79.96	11.3706	1.40287	0.0851805	17.5	0.004834	2.642	2.481	1.309	4.811	0.2	-0.262039	88.5194	0.737152	966.413	-1.78673	89.146	0	0	NA	NA	NA	NA	0	NA	NA	NA	4.36761e-08	190	1.42884	NA	NA
2021-03-18 21:50:00	OP-200m	UA-UW	MC	451.591	79.96	11.3706	1.40287	0.0851805	17.5	0.004834	2.642	2.481	1.309	4.811	0.2	-0.262039	88.5194	0.737152	966.413	-1.78673	89.146	0	0	NA	NA	NA	NA	0	NA	NA	NA	NA	0	1.44062	NA	NA
2021-03-18 21:50:00	OP-50m	UA-UW	MC	451.591	79.96	11.3706	1.40287	0.0851805	17.5	0.004834	2.642	2.481	1.309	4.811	0.2	-0.262039	88.5194	0.737152	966.413	-1.78673	89.146	0	0	NA	NA	NA	NA	0	NA	NA	NA	1.47646e-05	3625632	1.43849	NA	NA
2021-03-18 21:50:00	OP-UW	UA-UW	MC	451.591	79.96	11.3706	1.40287	0.0851805	17.5	0.004834	2.642	2.481	1.309	4.811	0.2	-0.262039	88.5194	0.737152	966.413	-1.78673	89.146	0	0	NA	NA	NA	NA	0	NA	NA	NA	NA	0	1.43222	NA	NA
2021-03-18 21:50:00	OP-100m	UA-100m	MC	451.591	93.069	35.2868	0.366732	0.0576999	3	0.9974	3.519	2.217	1.621	7.802	0.08	-0.262039	88.5194	0.737152	966.413	-1.78673	89.146	0	0	NA	NA	NA	NA	0	NA	NA	NA	NA	0	1.44529	NA	NA
2021-03-18 21:50:00	OP-150m	UA-100m	MC	451.591	93.069	35.2868	0.366732	0.0576999	3	0.9974	3.519	2.217	1.621	7.802	0.08	-0.262039	88.5194	0.737152	966.413	-1.78673	89.146	0	0	NA	NA	NA	NA	0	NA	NA	NA	NA	0	1.42884	NA	NA
2021-03-18 21:50:00	OP-200m	UA-100m	MC	451.591	93.069	35.2868	0.366732	0.0576999	3	0.9974	3.519	2.217	1.621	7.802	0.08	-0.262039	88.5194	0.737152	966.413	-1.78673	89.146	0	0	NA	NA	NA	NA	0	NA	NA	NA	NA	0	1.44062	NA	NA
2021-03-18 21:50:00	OP-50m	UA-100m	MC	451.591	93.069	35.2868	0.366732	0.0576999	3	0.9974	3.519	2.217	1.621	7.802	0.08	-0.262039	88.5194	0.737152	966.413	-1.78673	89.146	0	0	NA	NA	NA	NA	0	NA	NA	NA	5.81245e-06	1177252	1.43849	NA	NA
2021-03-18 21:50:00	OP-UW	UA-100m	MC	451.591	93.069	35.2868	0.366732	0.0576999	3	0.9974	3.519	2.217	1.621	7.802	0.08	-0.262039	88.5194	0.737152	966.413	-1.78673	89.146	0	0	NA	NA	NA	NA	0	NA	NA	NA	NA	0	1.43222	NA	NA
2021-03-18 22:00:00	OP-100m	UA-UW	MC	451.591	345.789	28.9792	0.945838	0.0631227	11.1	0.0121	3.262	7.247	1.674	8.461	0.2	-0.22	15.3666	0.637541	966.4	-1.92346	88.1531	0	0	NA	NA	NA	NA	0	NA	NA	NA	2.5251e-06	177208	1.42528	NA	NA
2021-03-18 22:00:00	OP-150m	UA-UW	MC	451.591	345.789	28.9792	0.945838	0.0631227	11.1	0.0121	3.262	7.247	1.674	8.461	0.2	-0.22	15.3666	0.637541	966.4	-1.92346	88.1531	0	0	NA	NA	NA	NA	0	NA	NA	NA	1.22465e-06	31445	1.4078	NA	NA
2021-03-18 22:00:00	OP-200m	UA-UW	MC	451.591	345.789	28.9792	0.945838	0.0631227	11.1	0.0121	3.262	7.247	1.674	8.461	0.2	-0.22	15.3666	0.637541	966.4	-1.92346	88.1531	0	0	NA	NA	NA	NA	0	NA	NA	NA	5.68983e-07	6103	1.41708	NA	NA
2021-03-18 22:00:00	OP-50m	UA-UW	MC	451.591	345.789	28.9792	0.945838	0.0631227	11.1	0.0121	3.262	7.247	1.674	8.461	0.2	-0.22	15.3666	0.637541	966.4	-1.92346	88.1531	0	0	NA	NA	NA	NA	0	NA	NA	NA	8.03793e-06	1238592	1.41523	NA	NA
2021-03-18 22:00:00	OP-UW	UA-UW	MC	451.591	345.789	28.9792	0.945838	0.0631227	11.1	0.0121	3.262	7.247	1.674	8.461	0.2	-0.22	15.3666	0.637541	966.4	-1.92346	88.1531	0	0	NA	NA	NA	NA	0	NA	NA	NA	NA	0	1.40972	NA	NA
2021-03-18 22:00:00	OP-100m	UA-100m	MC	451.591	343.672	38.5999	0.941224	0.0592596	3.9	0.04504	6.778	6.505	1.78	9.922	0.08	-0.22	15.3666	0.637541	966.4	-1.92346	88.1531	0	0	NA	NA	NA	NA	0	NA	NA	NA	1.61453e-06	69225	1.42528	NA	NA
2021-03-18 22:00:00	OP-150m	UA-100m	MC	451.591	343.672	38.5999	0.941224	0.0592596	3.9	0.04504	6.778	6.505	1.78	9.922	0.08	-0.22	15.3666	0.637541	966.4	-1.92346	88.1531	0	0	NA	NA	NA	NA	0	NA	NA	NA	3.01407e-07	3997	1.4078	NA	NA
2021-03-18 22:00:00	OP-200m	UA-100m	MC	451.591	343.672	38.5999	0.941224	0.0592596	3.9	0.04504	6.778	6.505	1.78	9.922	0.08	-0.22	15.3666	0.637541	966.4	-1.92346	88.1531	0	0	NA	NA	NA	NA	0	NA	NA	NA	1.09768e-08	65	1.41708	NA	NA
2021-03-18 22:00:00	OP-50m	UA-100m	MC	451.591	343.672	38.5999	0.941224	0.0592596	3.9	0.04504	6.778	6.505	1.78	9.922	0.08	-0.22	15.3666	0.637541	966.4	-1.92346	88.1531	0	0	NA	NA	NA	NA	0	NA	NA	NA	7.33988e-06	1159445	1.41523	NA	NA
2021-03-18 22:00:00	OP-UW	UA-100m	MC	451.591	343.672	38.5999	0.941224	0.0592596	3.9	0.04504	6.778	6.505	1.78	9.922	0.08	-0.22	15.3666	0.637541	966.4	-1.92346	88.1531	0	0	NA	NA	NA	NA	0	NA	NA	NA	NA	0	1.40972	NA	NA
2021-03-18 22:00:00	OP-100m	UA-150m	MC	451.591	332.57	23.284	1.00401	0.0746972	5.1	0.06572	4.719	4.079	1.243	4.36	0.08	-0.22	15.3666	0.637541	966.4	-1.92346	88.1531	0	0	NA	NA	NA	NA	0	NA	NA	NA	3.90116e-08	158	1.42528	NA	NA
2021-03-18 22:00:00	OP-150m	UA-150m	MC	451.591	332.57	23.284	1.00401	0.0746972	5.1	0.06572	4.719	4.079	1.243	4.36	0.08	-0.22	15.3666	0.637541	966.4	-1.92346	88.1531	0	0	NA	NA	NA	NA	0	NA	NA	NA	NA	0	1.4078	NA	NA
2021-03-18 22:00:00	OP-200m	UA-150m	MC	451.591	332.57	23.284	1.00401	0.0746972	5.1	0.06572	4.719	4.079	1.243	4.36	0.08	-0.22	15.3666	0.637541	966.4	-1.92346	88.1531	0	0	NA	NA	NA	NA	0	NA	NA	NA	NA	0	1.41708	NA	NA
2021-03-18 22:00:00	OP-50m	UA-150m	MC	451.591	332.57	23.284	1.00401	0.0746972	5.1	0.06572	4.719	4.079	1.243	4.36	0.08	-0.22	15.3666	0.637541	966.4	-1.92346	88.1531	0	0	NA	NA	NA	NA	0	NA	NA	NA	2.0758e-06	95225	1.41523	NA	NA
2021-03-18 22:00:00	OP-UW	UA-150m	MC	451.591	332.57	23.284	1.00401	0.0746972	5.1	0.06572	4.719	4.079	1.243	4.36	0.08	-0.22	15.3666	0.637541	966.4	-1.92346	88.1531	0	0	NA	NA	NA	NA	0	NA	NA	NA	NA	0	1.40972	NA	NA
2021-03-18 22:10:00	OP-100m	UA-UW	MC	451.591	18.266	11.6855	1.03998	0.0488076	-16.5	0.0003047	3.05	2.91	1.6	5.898	0.2	-0.292039	357.855	1.05081	966.4	-2.05	88.0867	0	0	NA	NA	NA	NA	0	NA	NA	NA	9.13372e-06	766372	1.45045	NA	NA
2021-03-18 22:10:00	OP-150m	UA-UW	MC	451.591	18.266	11.6855	1.03998	0.0488076	-16.5	0.0003047	3.05	2.91	1.6	5.898	0.2	-0.292039	357.855	1.05081	966.4	-2.05	88.0867	0	0	NA	NA	NA	NA	0	NA	NA	NA	1.83946e-06	38233	1.43298	NA	NA
2021-03-18 22:10:00	OP-200m	UA-UW	MC	451.591	18.266	11.6855	1.03998	0.0488076	-16.5	0.0003047	3.05	2.91	1.6	5.898	0.2	-0.292039	357.855	1.05081	966.4	-2.05	88.0867	0	0	NA	NA	NA	NA	0	NA	NA	NA	4.95141e-07	2601	1.44313	NA	NA
2021-03-18 22:10:00	OP-50m	UA-UW	MC	451.591	18.266	11.6855	1.03998	0.0488076	-16.5	0.0003047	3.05	2.91	1.6	5.898	0.2	-0.292039	357.855	1.05081	966.4	-2.05	88.0867	0	0	NA	NA	NA	NA	0	NA	NA	NA	2.31233e-05	3084230	1.44857	NA	NA
2021-03-18 22:10:00	OP-UW	UA-UW	MC	451.591	18.266	11.6855	1.03998	0.0488076	-16.5	0.0003047	3.05	2.91	1.6	5.898	0.2	-0.292039	357.855	1.05081	966.4	-2.05	88.0867	0	0	NA	NA	NA	NA	0	NA	NA	NA	NA	0	1.44439	NA	NA
2021-03-18 22:10:00	OP-100m	UA-100m	MC	451.591	7.894	8.97155	1.22167	0.0492413	3.7	0.001568	3.408	2.591	1.534	6.819	0.08	-0.292039	357.855	1.05081	966.4	-2.05	88.0867	0	0	NA	NA	NA	NA	0	NA	NA	NA	9.01853e-09	66	1.45045	NA	NA
2021-03-18 22:10:00	OP-150m	UA-100m	MC	451.591	7.894	8.97155	1.22167	0.0492413	3.7	0.001568	3.408	2.591	1.534	6.819	0.08	-0.292039	357.855	1.05081	966.4	-2.05	88.0867	0	0	NA	NA	NA	NA	0	NA	NA	NA	NA	0	1.43298	NA	NA
2021-03-18 22:10:00	OP-200m	UA-100m	MC	451.591	7.894	8.97155	1.22167	0.0492413	3.7	0.001568	3.408	2.591	1.534	6.819	0.08	-0.292039	357.855	1.05081	966.4	-2.05	88.0867	0	0	NA	NA	NA	NA	0	NA	NA	NA	NA	0	1.44313	NA	NA
2021-03-18 22:10:00	OP-50m	UA-100m	MC	451.591	7.894	8.97155	1.22167	0.0492413	3.7	0.001568	3.408	2.591	1.534	6.819	0.08	-0.292039	357.855	1.05081	966.4	-2.05	88.0867	0	0	NA	NA	NA	NA	0	NA	NA	NA	2.14756e-05	3964405	1.44857	NA	NA
2021-03-18 22:10:00	OP-UW	UA-100m	MC	451.591	7.894	8.97155	1.22167	0.0492413	3.7	0.001568	3.408	2.591	1.534	6.819	0.08	-0.292039	357.855	1.05081	966.4	-2.05	88.0867	0	0	NA	NA	NA	NA	0	NA	NA	NA	NA	0	1.44439	NA	NA
2021-03-18 22:10:00	OP-100m	UA-150m	MC	451.591	5.642	8.4038	1.22125	0.0571938	4.3	0.004383	2.718	2.342	1.364	5.233	0.08	-0.292039	357.855	1.05081	966.4	-2.05	88.0867	0	0	NA	NA	NA	NA	0	NA	NA	NA	3.23328e-09	21	1.45045	NA	NA
2021-03-18 22:10:00	OP-150m	UA-150m	MC	451.591	5.642	8.4038	1.22125	0.0571938	4.3	0.004383	2.718	2.342	1.364	5.233	0.08	-0.292039	357.855	1.05081	966.4	-2.05	88.0867	0	0	NA	NA	NA	NA	0	NA	NA	NA	NA	0	1.43298	NA	NA
2021-03-18 22:10:00	OP-200m	UA-150m	MC	451.591	5.642	8.4038	1.22125	0.0571938	4.3	0.004383	2.718	2.342	1.364	5.233	0.08	-0.292039	357.855	1.05081	966.4	-2.05	88.0867	0	0	NA	NA	NA	NA	0	NA	NA	NA	NA	0	1.44313	NA	NA
2021-03-18 22:10:00	OP-50m	UA-150m	MC	451.591	5.642	8.4038	1.22125	0.0571938	4.3	0.004383	2.718	2.342	1.364	5.233	0.08	-0.292039	357.855	1.05081	966.4	-2.05	88.0867	0	0	NA	NA	NA	NA	0	NA	NA	NA	1.60314e-05	3110996	1.44857	NA	NA
2021-03-18 22:10:00	OP-UW	UA-150m	MC	451.591	5.642	8.4038	1.22125	0.0571938	4.3	0.004383	2.718	2.342	1.364	5.233	0.08	-0.292039	357.855	1.05081	966.4	-2.05	88.0867	0	0	NA	NA	NA	NA	0	NA	NA	NA	NA	0	1.44439	NA	NA
2021-03-18 22:20:00	OP-100m	UA-UW	MC	451.591	52.873	10.3228	1.25897	0.108621	13	0.04088	2.5	2.032	1.232	4.291	0.2	-0.228576	28.1675	1.17612	966.363	-2.03673	87.145	0	0	NA	NA	NA	NA	0	NA	NA	NA	1.017e-05	3525458	1.42513	NA	NA
2021-03-18 22:20:00	OP-150m	UA-UW	MC	451.591	52.873	10.3228	1.25897	0.108621	13	0.04088	2.5	2.032	1.232	4.291	0.2	-0.228576	28.1675	1.17612	966.363	-2.03673	87.145	0	0	NA	NA	NA	NA	0	NA	NA	NA	1.0755e-05	2817705	1.41084	NA	NA
2021-03-18 22:20:00	OP-200m	UA-UW	MC	451.591	52.873	10.3228	1.25897	0.108621	13	0.04088	2.5	2.032	1.232	4.291	0.2	-0.228576	28.1675	1.17612	966.363	-2.03673	87.145	0	0	NA	NA	NA	NA	0	NA	NA	NA	8.72389e-06	2295299	1.42177	NA	NA
2021-03-18 22:20:00	OP-50m	UA-UW	MC	451.591	52.873	10.3228	1.25897	0.108621	13	0.04088	2.5	2.032	1.232	4.291	0.2	-0.228576	28.1675	1.17612	966.363	-2.03673	87.145	0	0	NA	NA	NA	NA	0	NA	NA	NA	1.36324e-05	5011736	1.42393	NA	NA
2021-03-18 22:20:00	OP-UW	UA-UW	MC	451.591	52.873	10.3228	1.25897	0.108621	13	0.04088	2.5	2.032	1.232	4.291	0.2	-0.228576	28.1675	1.17612	966.363	-2.03673	87.145	0	0	NA	NA	NA	NA	0	NA	NA	NA	NA	0	1.42174	NA	NA
2021-03-18 22:20:00	OP-100m	UA-100m	MC	451.591	38.883	12.619	1.52563	0.124032	13.8	0.03164	3.29	1.839	1.24	4.341	0.08	-0.228576	28.1675	1.17612	966.363	-2.03673	87.145	0	0	NA	NA	NA	NA	0	NA	NA	NA	9.3783e-06	3452090	1.42513	NA	NA
2021-03-18 22:20:00	OP-150m	UA-100m	MC	451.591	38.883	12.619	1.52563	0.124032	13.8	0.03164	3.29	1.839	1.24	4.341	0.08	-0.228576	28.1675	1.17612	966.363	-2.03673	87.145	0	0	NA	NA	NA	NA	0	NA	NA	NA	8.26959e-06	2708361	1.41084	NA	NA
2021-03-18 22:20:00	OP-200m	UA-100m	MC	451.591	38.883	12.619	1.52563	0.124032	13.8	0.03164	3.29	1.839	1.24	4.341	0.08	-0.228576	28.1675	1.17612	966.363	-2.03673	87.145	0	0	NA	NA	NA	NA	0	NA	NA	NA	7.99222e-06	2278118	1.42177	NA	NA
2021-03-18 22:20:00	OP-50m	UA-100m	MC	451.591	38.883	12.619	1.52563	0.124032	13.8	0.03164	3.29	1.839	1.24	4.341	0.08	-0.228576	28.1675	1.17612	966.363	-2.03673	87.145	0	0	NA	NA	NA	NA	0	NA	NA	NA	1.12054e-05	4926150	1.42393	NA	NA
2021-03-18 22:20:00	OP-UW	UA-100m	MC	451.591	38.883	12.619	1.52563	0.124032	13.8	0.03164	3.29	1.839	1.24	4.341	0.08	-0.228576	28.1675	1.17612	966.363	-2.03673	87.145	0	0	NA	NA	NA	NA	0	NA	NA	NA	NA	0	1.42174	NA	NA
2021-03-18 22:20:00	OP-100m	UA-150m	MC	451.591	39.522	13.4155	1.56213	0.102346	9.1	0.01423	3.868	2.092	1.245	4.373	0.08	-0.228576	28.1675	1.17612	966.363	-2.03673	87.145	0	0	NA	NA	NA	NA	0	NA	NA	NA	1.29019e-05	3581203	1.42513	NA	NA
2021-03-18 22:20:00	OP-150m	UA-150m	MC	451.591	39.522	13.4155	1.56213	0.102346	9.1	0.01423	3.868	2.092	1.245	4.373	0.08	-0.228576	28.1675	1.17612	966.363	-2.03673	87.145	0	0	NA	NA	NA	NA	0	NA	NA	NA	1.09969e-05	2925214	1.41084	NA	NA
2021-03-18 22:20:00	OP-200m	UA-150m	MC	451.591	39.522	13.4155	1.56213	0.102346	9.1	0.01423	3.868	2.092	1.245	4.373	0.08	-0.228576	28.1675	1.17612	966.363	-2.03673	87.145	0	0	NA	NA	NA	NA	0	NA	NA	NA	1.33027e-05	2466284	1.42177	NA	NA
2021-03-18 22:20:00	OP-50m	UA-150m	MC	451.591	39.522	13.4155	1.56213	0.102346	9.1	0.01423	3.868	2.092	1.245	4.373	0.08	-0.228576	28.1675	1.17612	966.363	-2.03673	87.145	0	0	NA	NA	NA	NA	0	NA	NA	NA	1.52352e-05	4900911	1.42393	NA	NA
2021-03-18 22:20:00	OP-UW	UA-150m	MC	451.591	39.522	13.4155	1.56213	0.102346	9.1	0.01423	3.868	2.092	1.245	4.373	0.08	-0.228576	28.1675	1.17612	966.363	-2.03673	87.145	0	0	NA	NA	NA	NA	0	NA	NA	NA	NA	0	1.42174	NA	NA
2021-03-18 22:30:00	OP-100m	UA-UW	MC	451.591	79.403	8.9296	1.68907	0.0828277	44	0.0007355	2.862	2.384	1.359	5.193	0.2	0.0555013	62.1993	1.59693	966.177	-2.36019	83.649	0	0	NA	NA	NA	NA	0	NA	NA	NA	1.24346e-06	67114	1.4057	NA	NA
2021-03-18 22:30:00	OP-150m	UA-UW	MC	451.591	79.403	8.9296	1.68907	0.0828277	44	0.0007355	2.862	2.384	1.359	5.193	0.2	0.0555013	62.1993	1.59693	966.177	-2.36019	83.649	0	0	NA	NA	NA	NA	0	NA	NA	NA	2.75466e-08	108	1.38597	NA	NA
2021-03-18 22:30:00	OP-200m	UA-UW	MC	451.591	79.403	8.9296	1.68907	0.0828277	44	0.0007355	2.862	2.384	1.359	5.193	0.2	0.0555013	62.1993	1.59693	966.177	-2.36019	83.649	0	0	NA	NA	NA	NA	0	NA	NA	NA	NA	0	1.39283	NA	NA
2021-03-18 22:30:00	OP-50m	UA-UW	MC	451.591	79.403	8.9296	1.68907	0.0828277	44	0.0007355	2.862	2.384	1.359	5.193	0.2	0.0555013	62.1993	1.59693	966.177	-2.36019	83.649	0	0	NA	NA	NA	NA	0	NA	NA	NA	1.32212e-05	3220445	1.39994	NA	NA
2021-03-18 22:30:00	OP-UW	UA-UW	MC	451.591	79.403	8.9296	1.68907	0.0828277	44	0.0007355	2.862	2.384	1.359	5.193	0.2	0.0555013	62.1993	1.59693	966.177	-2.36019	83.649	0	0	NA	NA	NA	NA	0	NA	NA	NA	NA	0	1.40559	NA	NA
2021-03-18 22:30:00	OP-100m	UA-100m	MC	451.591	79.982	17.4583	1.61687	0.086485	8	0.004217	3.19	3.484	1.427	5.771	0.08	0.0555013	62.1993	1.59693	966.177	-2.36019	83.649	0	0	NA	NA	NA	NA	0	NA	NA	NA	2.68138e-06	305834	1.4057	NA	NA
2021-03-18 22:30:00	OP-150m	UA-100m	MC	451.591	79.982	17.4583	1.61687	0.086485	8	0.004217	3.19	3.484	1.427	5.771	0.08	0.0555013	62.1993	1.59693	966.177	-2.36019	83.649	0	0	NA	NA	NA	NA	0	NA	NA	NA	2.87676e-07	4886	1.38597	NA	NA
2021-03-18 22:30:00	OP-200m	UA-100m	MC	451.591	79.982	17.4583	1.61687	0.086485	8	0.004217	3.19	3.484	1.427	5.771	0.08	0.0555013	62.1993	1.59693	966.177	-2.36019	83.649	0	0	NA	NA	NA	NA	0	NA	NA	NA	1.35728e-08	76	1.39283	NA	NA
2021-03-18 22:30:00	OP-50m	UA-100m	MC	451.591	79.982	17.4583	1.61687	0.086485	8	0.004217	3.19	3.484	1.427	5.771	0.08	0.0555013	62.1993	1.59693	966.177	-2.36019	83.649	0	0	NA	NA	NA	NA	0	NA	NA	NA	1.30819e-05	3884033	1.39994	NA	NA
2021-03-18 22:30:00	OP-UW	UA-100m	MC	451.591	79.982	17.4583	1.61687	0.086485	8	0.004217	3.19	3.484	1.427	5.771	0.08	0.0555013	62.1993	1.59693	966.177	-2.36019	83.649	0	0	NA	NA	NA	NA	0	NA	NA	NA	NA	0	1.40559	NA	NA
2021-03-18 22:30:00	OP-100m	UA-150m	MC	451.591	81.287	18.7921	1.66925	0.0899268	8.9	0.003902	2.676	3.304	1.404	5.568	0.08	0.0555013	62.1993	1.59693	966.177	-2.36019	83.649	0	0	NA	NA	NA	NA	0	NA	NA	NA	1.81648e-06	171295	1.4057	NA	NA
2021-03-18 22:30:00	OP-150m	UA-150m	MC	451.591	81.287	18.7921	1.66925	0.0899268	8.9	0.003902	2.676	3.304	1.404	5.568	0.08	0.0555013	62.1993	1.59693	966.177	-2.36019	83.649	0	0	NA	NA	NA	NA	0	NA	NA	NA	2.32641e-07	1841	1.38597	NA	NA
2021-03-18 22:30:00	OP-200m	UA-150m	MC	451.591	81.287	18.7921	1.66925	0.0899268	8.9	0.003902	2.676	3.304	1.404	5.568	0.08	0.0555013	62.1993	1.59693	966.177	-2.36019	83.649	0	0	NA	NA	NA	NA	0	NA	NA	NA	NA	0	1.39283	NA	NA
2021-03-18 22:30:00	OP-50m	UA-150m	MC	451.591	81.287	18.7921	1.66925	0.0899268	8.9	0.003902	2.676	3.304	1.404	5.568	0.08	0.0555013	62.1993	1.59693	966.177	-2.36019	83.649	0	0	NA	NA	NA	NA	0	NA	NA	NA	1.20652e-05	3579797	1.39994	NA	NA
2021-03-18 22:30:00	OP-UW	UA-150m	MC	451.591	81.287	18.7921	1.66925	0.0899268	8.9	0.003902	2.676	3.304	1.404	5.568	0.08	0.0555013	62.1993	1.59693	966.177	-2.36019	83.649	0	0	NA	NA	NA	NA	0	NA	NA	NA	NA	0	1.40559	NA	NA
2021-03-18 22:40:00	OP-100m	UA-UW	MC	451.591	78.227	16.2763	1.10612	0.0723206	23	0.006778	2.443	2.618	1.256	4.444	0.2	-0.176925	86.2724	1.29615	965.977	-2.05308	87.9529	0	0	NA	NA	NA	NA	0	NA	NA	NA	3.73628e-06	297779	1.40998	NA	NA
2021-03-18 22:40:00	OP-150m	UA-UW	MC	451.591	78.227	16.2763	1.10612	0.0723206	23	0.006778	2.443	2.618	1.256	4.444	0.2	-0.176925	86.2724	1.29615	965.977	-2.05308	87.9529	0	0	NA	NA	NA	NA	0	NA	NA	NA	3.97689e-07	5136	1.38917	NA	NA
2021-03-18 22:40:00	OP-200m	UA-UW	MC	451.591	78.227	16.2763	1.10612	0.0723206	23	0.006778	2.443	2.618	1.256	4.444	0.2	-0.176925	86.2724	1.29615	965.977	-2.05308	87.9529	0	0	NA	NA	NA	NA	0	NA	NA	NA	5.40222e-09	18	1.40237	NA	NA
2021-03-18 22:40:00	OP-50m	UA-UW	MC	451.591	78.227	16.2763	1.10612	0.0723206	23	0.006778	2.443	2.618	1.256	4.444	0.2	-0.176925	86.2724	1.29615	965.977	-2.05308	87.9529	0	0	NA	NA	NA	NA	0	NA	NA	NA	1.669e-05	3718090	1.40329	NA	NA
2021-03-18 22:40:00	OP-UW	UA-UW	MC	451.591	78.227	16.2763	1.10612	0.0723206	23	0.006778	2.443	2.618	1.256	4.444	0.2	-0.176925	86.2724	1.29615	965.977	-2.05308	87.9529	0	0	NA	NA	NA	NA	0	NA	NA	NA	NA	0	1.39813	NA	NA
2021-03-18 22:40:00	OP-100m	UA-100m	MC	451.591	86.308	10.6074	1.14384	0.0597795	5.8	0.005766	2.685	2.599	1.445	5.935	0.08	-0.176925	86.2724	1.29615	965.977	-2.05308	87.9529	0	0	NA	NA	NA	NA	0	NA	NA	NA	2.00335e-08	192	1.40998	NA	NA
2021-03-18 22:40:00	OP-150m	UA-100m	MC	451.591	86.308	10.6074	1.14384	0.0597795	5.8	0.005766	2.685	2.599	1.445	5.935	0.08	-0.176925	86.2724	1.29615	965.977	-2.05308	87.9529	0	0	NA	NA	NA	NA	0	NA	NA	NA	NA	0	1.38917	NA	NA
2021-03-18 22:40:00	OP-200m	UA-100m	MC	451.591	86.308	10.6074	1.14384	0.0597795	5.8	0.005766	2.685	2.599	1.445	5.935	0.08	-0.176925	86.2724	1.29615	965.977	-2.05308	87.9529	0	0	NA	NA	NA	NA	0	NA	NA	NA	NA	0	1.40237	NA	NA
2021-03-18 22:40:00	OP-50m	UA-100m	MC	451.591	86.308	10.6074	1.14384	0.0597795	5.8	0.005766	2.685	2.599	1.445	5.935	0.08	-0.176925	86.2724	1.29615	965.977	-2.05308	87.9529	0	0	NA	NA	NA	NA	0	NA	NA	NA	1.4509e-05	2624593	1.40329	NA	NA
2021-03-18 22:40:00	OP-UW	UA-100m	MC	451.591	86.308	10.6074	1.14384	0.0597795	5.8	0.005766	2.685	2.599	1.445	5.935	0.08	-0.176925	86.2724	1.29615	965.977	-2.05308	87.9529	0	0	NA	NA	NA	NA	0	NA	NA	NA	NA	0	1.39813	NA	NA
2021-03-18 22:40:00	OP-100m	UA-150m	MC	451.591	87.453	10.1933	1.21516	0.065502	6.5	0.00601	2.504	2.387	1.423	5.735	0.08	-0.176925	86.2724	1.29615	965.977	-2.05308	87.9529	0	0	NA	NA	NA	NA	0	NA	NA	NA	6.53504e-09	12	1.40998	NA	NA
2021-03-18 22:40:00	OP-150m	UA-150m	MC	451.591	87.453	10.1933	1.21516	0.065502	6.5	0.00601	2.504	2.387	1.423	5.735	0.08	-0.176925	86.2724	1.29615	965.977	-2.05308	87.9529	0	0	NA	NA	NA	NA	0	NA	NA	NA	NA	0	1.38917	NA	NA
2021-03-18 22:40:00	OP-200m	UA-150m	MC	451.591	87.453	10.1933	1.21516	0.065502	6.5	0.00601	2.504	2.387	1.423	5.735	0.08	-0.176925	86.2724	1.29615	965.977	-2.05308	87.9529	0	0	NA	NA	NA	NA	0	NA	NA	NA	NA	0	1.40237	NA	NA
2021-03-18 22:40:00	OP-50m	UA-150m	MC	451.591	87.453	10.1933	1.21516	0.065502	6.5	0.00601	2.504	2.387	1.423	5.735	0.08	-0.176925	86.2724	1.29615	965.977	-2.05308	87.9529	0	0	NA	NA	NA	NA	0	NA	NA	NA	1.00425e-05	2120040	1.40329	NA	NA
2021-03-18 22:40:00	OP-UW	UA-150m	MC	451.591	87.453	10.1933	1.21516	0.065502	6.5	0.00601	2.504	2.387	1.423	5.735	0.08	-0.176925	86.2724	1.29615	965.977	-2.05308	87.9529	0	0	NA	NA	NA	NA	0	NA	NA	NA	NA	0	1.39813	NA	NA
2021-03-18 22:50:00	OP-100m	UA-UW	MC	451.591	78.982	29.7362	0.555169	0.0241389	0.6	0.9055	4.547	10.721	2.517	26.149	0.2	-0.3	78.2482	0.661845	965.863	-2	88.1531	0	0	NA	NA	NA	NA	0	NA	NA	NA	2.41831e-05	3423763	1.40019	NA	NA
2021-03-18 22:50:00	OP-150m	UA-UW	MC	451.591	78.982	29.7362	0.555169	0.0241389	0.6	0.9055	4.547	10.721	2.517	26.149	0.2	-0.3	78.2482	0.661845	965.863	-2	88.1531	0	0	NA	NA	NA	NA	0	NA	NA	NA	1.06252e-05	726998	1.37818	NA	NA
2021-03-18 22:50:00	OP-200m	UA-UW	MC	451.591	78.982	29.7362	0.555169	0.0241389	0.6	0.9055	4.547	10.721	2.517	26.149	0.2	-0.3	78.2482	0.661845	965.863	-2	88.1531	0	0	NA	NA	NA	NA	0	NA	NA	NA	4.04509e-06	130474	1.38886	NA	NA
2021-03-18 22:50:00	OP-50m	UA-UW	MC	451.591	78.982	29.7362	0.555169	0.0241389	0.6	0.9055	4.547	10.721	2.517	26.149	0.2	-0.3	78.2482	0.661845	965.863	-2	88.1531	0	0	NA	NA	NA	NA	0	NA	NA	NA	4.76714e-05	12393781	1.39801	NA	NA
2021-03-18 22:50:00	OP-UW	UA-UW	MC	451.591	78.982	29.7362	0.555169	0.0241389	0.6	0.9055	4.547	10.721	2.517	26.149	0.2	-0.3	78.2482	0.661845	965.863	-2	88.1531	0	0	NA	NA	NA	NA	0	NA	NA	NA	NA	0	1.41137	NA	NA
2021-03-18 22:50:00	OP-100m	UA-100m	MC	451.591	79.25	15.2751	0.890317	0.0511567	6.2	0.01023	4.015	3.767	1.228	4.266	0.08	-0.3	78.2482	0.661845	965.863	-2	88.1531	0	0	NA	NA	NA	NA	0	NA	NA	NA	9.34067e-06	651099	1.40019	NA	NA
2021-03-18 22:50:00	OP-150m	UA-100m	MC	451.591	79.25	15.2751	0.890317	0.0511567	6.2	0.01023	4.015	3.767	1.228	4.266	0.08	-0.3	78.2482	0.661845	965.863	-2	88.1531	0	0	NA	NA	NA	NA	0	NA	NA	NA	2.4158e-06	55898	1.37818	NA	NA
2021-03-18 22:50:00	OP-200m	UA-100m	MC	451.591	79.25	15.2751	0.890317	0.0511567	6.2	0.01023	4.015	3.767	1.228	4.266	0.08	-0.3	78.2482	0.661845	965.863	-2	88.1531	0	0	NA	NA	NA	NA	0	NA	NA	NA	4.75092e-07	2903	1.38886	NA	NA
2021-03-18 22:50:00	OP-50m	UA-100m	MC	451.591	79.25	15.2751	0.890317	0.0511567	6.2	0.01023	4.015	3.767	1.228	4.266	0.08	-0.3	78.2482	0.661845	965.863	-2	88.1531	0	0	NA	NA	NA	NA	0	NA	NA	NA	2.4665e-05	3900141	1.39801	NA	NA
2021-03-18 22:50:00	OP-UW	UA-100m	MC	451.591	79.25	15.2751	0.890317	0.0511567	6.2	0.01023	4.015	3.767	1.228	4.266	0.08	-0.3	78.2482	0.661845	965.863	-2	88.1531	0	0	NA	NA	NA	NA	0	NA	NA	NA	NA	0	1.41137	NA	NA
2021-03-18 22:50:00	OP-100m	UA-150m	MC	451.591	79.633	23.9356	0.805931	0.0328269	1.1	0.3362	5.116	6.343	2.117	15.936	0.08	-0.3	78.2482	0.661845	965.863	-2	88.1531	0	0	NA	NA	NA	NA	0	NA	NA	NA	1.1755e-05	1324365	1.40019	NA	NA
2021-03-18 22:50:00	OP-150m	UA-150m	MC	451.591	79.633	23.9356	0.805931	0.0328269	1.1	0.3362	5.116	6.343	2.117	15.936	0.08	-0.3	78.2482	0.661845	965.863	-2	88.1531	0	0	NA	NA	NA	NA	0	NA	NA	NA	1.96492e-06	69748	1.37818	NA	NA
2021-03-18 22:50:00	OP-200m	UA-150m	MC	451.591	79.633	23.9356	0.805931	0.0328269	1.1	0.3362	5.116	6.343	2.117	15.936	0.08	-0.3	78.2482	0.661845	965.863	-2	88.1531	0	0	NA	NA	NA	NA	0	NA	NA	NA	3.72722e-07	1719	1.38886	NA	NA
2021-03-18 22:50:00	OP-50m	UA-150m	MC	451.591	79.633	23.9356	0.805931	0.0328269	1.1	0.3362	5.116	6.343	2.117	15.936	0.08	-0.3	78.2482	0.661845	965.863	-2	88.1531	0	0	NA	NA	NA	NA	0	NA	NA	NA	3.39194e-05	8828276	1.39801	NA	NA
2021-03-18 22:50:00	OP-UW	UA-150m	MC	451.591	79.633	23.9356	0.805931	0.0328269	1.1	0.3362	5.116	6.343	2.117	15.936	0.08	-0.3	78.2482	0.661845	965.863	-2	88.1531	0	0	NA	NA	NA	NA	0	NA	NA	NA	NA	0	1.41137	NA	NA
2021-03-18 23:00:00	OP-100m	UA-UW	MC	451.591	30.253	38.4787	0.669347	0.0357852	-186.5	0.001077	3.216	6.009	1.774	9.56	0.2	-0.3	59.9236	0.75877	965.8	-2	88.1133	0	0	NA	NA	NA	NA	0	NA	NA	NA	1.89707e-05	1940512	1.3984	NA	NA
2021-03-18 23:00:00	OP-150m	UA-UW	MC	451.591	30.253	38.4787	0.669347	0.0357852	-186.5	0.001077	3.216	6.009	1.774	9.56	0.2	-0.3	59.9236	0.75877	965.8	-2	88.1133	0	0	NA	NA	NA	NA	0	NA	NA	NA	1.48579e-05	1107195	1.37812	NA	NA
2021-03-18 23:00:00	OP-200m	UA-UW	MC	451.591	30.253	38.4787	0.669347	0.0357852	-186.5	0.001077	3.216	6.009	1.774	9.56	0.2	-0.3	59.9236	0.75877	965.8	-2	88.1133	0	0	NA	NA	NA	NA	0	NA	NA	NA	1.09456e-05	667906	1.38651	NA	NA
2021-03-18 23:00:00	OP-50m	UA-UW	MC	451.591	30.253	38.4787	0.669347	0.0357852	-186.5	0.001077	3.216	6.009	1.774	9.56	0.2	-0.3	59.9236	0.75877	965.8	-2	88.1133	0	0	NA	NA	NA	NA	0	NA	NA	NA	2.57576e-05	3604201	1.39673	NA	NA
2021-03-18 23:00:00	OP-UW	UA-UW	MC	451.591	30.253	38.4787	0.669347	0.0357852	-186.5	0.001077	3.216	6.009	1.774	9.56	0.2	-0.3	59.9236	0.75877	965.8	-2	88.1133	0	0	NA	NA	NA	NA	0	NA	NA	NA	NA	0	1.39874	NA	NA
2021-03-18 23:00:00	OP-100m	UA-100m	MC	451.591	27.838	30.272	0.933742	0.0429133	4.3	0.003739	2.817	6.625	1.468	6.152	0.08	-0.3	59.9236	0.75877	965.8	-2	88.1133	0	0	NA	NA	NA	NA	0	NA	NA	NA	2.2204e-05	3055830	1.3984	NA	NA
2021-03-18 23:00:00	OP-150m	UA-100m	MC	451.591	27.838	30.272	0.933742	0.0429133	4.3	0.003739	2.817	6.625	1.468	6.152	0.08	-0.3	59.9236	0.75877	965.8	-2	88.1133	0	0	NA	NA	NA	NA	0	NA	NA	NA	1.97612e-05	1909194	1.37812	NA	NA
2021-03-18 23:00:00	OP-200m	UA-100m	MC	451.591	27.838	30.272	0.933742	0.0429133	4.3	0.003739	2.817	6.625	1.468	6.152	0.08	-0.3	59.9236	0.75877	965.8	-2	88.1133	0	0	NA	NA	NA	NA	0	NA	NA	NA	1.85036e-05	1264670	1.38651	NA	NA
2021-03-18 23:00:00	OP-50m	UA-100m	MC	451.591	27.838	30.272	0.933742	0.0429133	4.3	0.003739	2.817	6.625	1.468	6.152	0.08	-0.3	59.9236	0.75877	965.8	-2	88.1133	0	0	NA	NA	NA	NA	0	NA	NA	NA	2.80113e-05	4575769	1.39673	NA	NA
2021-03-18 23:00:00	OP-UW	UA-100m	MC	451.591	27.838	30.272	0.933742	0.0429133	4.3	0.003739	2.817	6.625	1.468	6.152	0.08	-0.3	59.9236	0.75877	965.8	-2	88.1133	0	0	NA	NA	NA	NA	0	NA	NA	NA	NA	0	1.39874	NA	NA
2021-03-18 23:00:00	OP-100m	UA-150m	MC	451.591	23.396	30.5575	0.97969	0.0307408	1.2	0.02071	4.44	9.629	2.019	13.961	0.08	-0.3	59.9236	0.75877	965.8	-2	88.1133	0	0	NA	NA	NA	NA	0	NA	NA	NA	2.58085e-05	3792589	1.3984	NA	NA
2021-03-18 23:00:00	OP-150m	UA-150m	MC	451.591	23.396	30.5575	0.97969	0.0307408	1.2	0.02071	4.44	9.629	2.019	13.961	0.08	-0.3	59.9236	0.75877	965.8	-2	88.1133	0	0	NA	NA	NA	NA	0	NA	NA	NA	1.90198e-05	2216312	1.37812	NA	NA
2021-03-18 23:00:00	OP-200m	UA-150m	MC	451.591	23.396	30.5575	0.97969	0.0307408	1.2	0.02071	4.44	9.629	2.019	13.961	0.08	-0.3	59.9236	0.75877	965.8	-2	88.1133	0	0	NA	NA	NA	NA	0	NA	NA	NA	1.5152e-05	1310214	1.38651	NA	NA
2021-03-18 23:00:00	OP-50m	UA-150m	MC	451.591	23.396	30.5575	0.97969	0.0307408	1.2	0.02071	4.44	9.629	2.019	13.961	0.08	-0.3	59.9236	0.75877	965.8	-2	88.1133	0	0	NA	NA	NA	NA	0	NA	NA	NA	3.16197e-05	5583955	1.39673	NA	NA
2021-03-18 23:00:00	OP-UW	UA-150m	MC	451.591	23.396	30.5575	0.97969	0.0307408	1.2	0.02071	4.44	9.629	2.019	13.961	0.08	-0.3	59.9236	0.75877	965.8	-2	88.1133	0	0	NA	NA	NA	NA	0	NA	NA	NA	NA	0	1.39874	NA	NA
2021-03-18 23:10:00	OP-100m	UA-UW	MC	451.591	31.4	15.4071	1.21877	0.0705505	33.3	0.002715	3.844	2.379	1.326	4.937	0.2	-0.462847	20.6705	1.191	965.8	-2.03673	89.1173	0	0	NA	NA	NA	NA	0	NA	NA	NA	1.69072e-05	2814461	1.45084	NA	NA
2021-03-18 23:10:00	OP-150m	UA-UW	MC	451.591	31.4	15.4071	1.21877	0.0705505	33.3	0.002715	3.844	2.379	1.326	4.937	0.2	-0.462847	20.6705	1.191	965.8	-2.03673	89.1173	0	0	NA	NA	NA	NA	0	NA	NA	NA	1.1694e-05	1947041	1.43016	NA	NA
2021-03-18 23:10:00	OP-200m	UA-UW	MC	451.591	31.4	15.4071	1.21877	0.0705505	33.3	0.002715	3.844	2.379	1.326	4.937	0.2	-0.462847	20.6705	1.191	965.8	-2.03673	89.1173	0	0	NA	NA	NA	NA	0	NA	NA	NA	9.31526e-06	1071775	1.44124	NA	NA
2021-03-18 23:10:00	OP-50m	UA-UW	MC	451.591	31.4	15.4071	1.21877	0.0705505	33.3	0.002715	3.844	2.379	1.326	4.937	0.2	-0.462847	20.6705	1.191	965.8	-2.03673	89.1173	0	0	NA	NA	NA	NA	0	NA	NA	NA	2.12257e-05	3972041	1.45874	NA	NA
2021-03-18 23:10:00	OP-UW	UA-UW	MC	451.591	31.4	15.4071	1.21877	0.0705505	33.3	0.002715	3.844	2.379	1.326	4.937	0.2	-0.462847	20.6705	1.191	965.8	-2.03673	89.1173	0	0	NA	NA	NA	NA	0	NA	NA	NA	NA	0	1.47385	NA	NA
2021-03-18 23:10:00	OP-100m	UA-100m	MC	451.591	25.859	12.9334	1.39507	0.0671674	10.3	0.001381	2.811	2.907	1.335	5.005	0.08	-0.462847	20.6705	1.191	965.8	-2.03673	89.1173	0	0	NA	NA	NA	NA	0	NA	NA	NA	1.68729e-05	2957076	1.45084	NA	NA
2021-03-18 23:10:00	OP-150m	UA-100m	MC	451.591	25.859	12.9334	1.39507	0.0671674	10.3	0.001381	2.811	2.907	1.335	5.005	0.08	-0.462847	20.6705	1.191	965.8	-2.03673	89.1173	0	0	NA	NA	NA	NA	0	NA	NA	NA	1.10661e-05	1160823	1.43016	NA	NA
2021-03-18 23:10:00	OP-200m	UA-100m	MC	451.591	25.859	12.9334	1.39507	0.0671674	10.3	0.001381	2.811	2.907	1.335	5.005	0.08	-0.462847	20.6705	1.191	965.8	-2.03673	89.1173	0	0	NA	NA	NA	NA	0	NA	NA	NA	3.35692e-06	214112	1.44124	NA	NA
2021-03-18 23:10:00	OP-50m	UA-100m	MC	451.591	25.859	12.9334	1.39507	0.0671674	10.3	0.001381	2.811	2.907	1.335	5.005	0.08	-0.462847	20.6705	1.191	965.8	-2.03673	89.1173	0	0	NA	NA	NA	NA	0	NA	NA	NA	2.05403e-05	4153281	1.45874	NA	NA
2021-03-18 23:10:00	OP-UW	UA-100m	MC	451.591	25.859	12.9334	1.39507	0.0671674	10.3	0.001381	2.811	2.907	1.335	5.005	0.08	-0.462847	20.6705	1.191	965.8	-2.03673	89.1173	0	0	NA	NA	NA	NA	0	NA	NA	NA	NA	0	1.47385	NA	NA
2021-03-18 23:10:00	OP-100m	UA-150m	MC	451.591	26.578	12.9489	1.42091	0.066254	6.4	0.001912	3.796	3.067	1.319	4.885	0.08	-0.462847	20.6705	1.191	965.8	-2.03673	89.1173	0	0	NA	NA	NA	NA	0	NA	NA	NA	1.99768e-05	3331906	1.45084	NA	NA
2021-03-18 23:10:00	OP-150m	UA-150m	MC	451.591	26.578	12.9489	1.42091	0.066254	6.4	0.001912	3.796	3.067	1.319	4.885	0.08	-0.462847	20.6705	1.191	965.8	-2.03673	89.1173	0	0	NA	NA	NA	NA	0	NA	NA	NA	1.07236e-05	1480377	1.43016	NA	NA
2021-03-18 23:10:00	OP-200m	UA-150m	MC	451.591	26.578	12.9489	1.42091	0.066254	6.4	0.001912	3.796	3.067	1.319	4.885	0.08	-0.462847	20.6705	1.191	965.8	-2.03673	89.1173	0	0	NA	NA	NA	NA	0	NA	NA	NA	4.54192e-06	348632	1.44124	NA	NA
2021-03-18 23:10:00	OP-50m	UA-150m	MC	451.591	26.578	12.9489	1.42091	0.066254	6.4	0.001912	3.796	3.067	1.319	4.885	0.08	-0.462847	20.6705	1.191	965.8	-2.03673	89.1173	0	0	NA	NA	NA	NA	0	NA	NA	NA	2.04193e-05	4355888	1.45874	NA	NA
2021-03-18 23:10:00	OP-UW	UA-150m	MC	451.591	26.578	12.9489	1.42091	0.066254	6.4	0.001912	3.796	3.067	1.319	4.885	0.08	-0.462847	20.6705	1.191	965.8	-2.03673	89.1173	0	0	NA	NA	NA	NA	0	NA	NA	NA	NA	0	1.47385	NA	NA
2021-03-18 23:20:00	OP-100m	UA-UW	MC	451.591	58.245	6.14682	0.852444	0.0442939	10.6	0.002311	2.666	2.044	1.461	6.085	0.2	-0.49123	48.8304	1.02635	965.713	-2.18673	88.1021	0	0	NA	NA	NA	NA	0	NA	NA	NA	2.44105e-05	3477253	1.46041	NA	NA
2021-03-18 23:20:00	OP-150m	UA-UW	MC	451.591	58.245	6.14682	0.852444	0.0442939	10.6	0.002311	2.666	2.044	1.461	6.085	0.2	-0.49123	48.8304	1.02635	965.713	-2.18673	88.1021	0	0	NA	NA	NA	NA	0	NA	NA	NA	2.14965e-05	2727387	1.4313	NA	NA
2021-03-18 23:20:00	OP-200m	UA-UW	MC	451.591	58.245	6.14682	0.852444	0.0442939	10.6	0.002311	2.666	2.044	1.461	6.085	0.2	-0.49123	48.8304	1.02635	965.713	-2.18673	88.1021	0	0	NA	NA	NA	NA	0	NA	NA	NA	1.79529e-05	1719518	1.44722	NA	NA
2021-03-18 23:20:00	OP-50m	UA-UW	MC	451.591	58.245	6.14682	0.852444	0.0442939	10.6	0.002311	2.666	2.044	1.461	6.085	0.2	-0.49123	48.8304	1.02635	965.713	-2.18673	88.1021	0	0	NA	NA	NA	NA	0	NA	NA	NA	2.66428e-05	4489303	1.44682	NA	NA
2021-03-18 23:20:00	OP-UW	UA-UW	MC	451.591	58.245	6.14682	0.852444	0.0442939	10.6	0.002311	2.666	2.044	1.461	6.085	0.2	-0.49123	48.8304	1.02635	965.713	-2.18673	88.1021	0	0	NA	NA	NA	NA	0	NA	NA	NA	NA	0	1.42725	NA	NA
2021-03-18 23:20:00	OP-100m	UA-100m	MC	451.591	55.506	6.40734	0.85221	0.0332708	1.5	0.05621	2.608	2.606	1.751	9.503	0.08	-0.49123	48.8304	1.02635	965.713	-2.18673	88.1021	0	0	NA	NA	NA	NA	0	NA	NA	NA	3.51604e-05	6330576	1.46041	NA	NA
2021-03-18 23:20:00	OP-150m	UA-100m	MC	451.591	55.506	6.40734	0.85221	0.0332708	1.5	0.05621	2.608	2.606	1.751	9.503	0.08	-0.49123	48.8304	1.02635	965.713	-2.18673	88.1021	0	0	NA	NA	NA	NA	0	NA	NA	NA	3.17985e-05	5423778	1.4313	NA	NA
2021-03-18 23:20:00	OP-200m	UA-100m	MC	451.591	55.506	6.40734	0.85221	0.0332708	1.5	0.05621	2.608	2.606	1.751	9.503	0.08	-0.49123	48.8304	1.02635	965.713	-2.18673	88.1021	0	0	NA	NA	NA	NA	0	NA	NA	NA	3.01793e-05	4668259	1.44722	NA	NA
2021-03-18 23:20:00	OP-50m	UA-100m	MC	451.591	55.506	6.40734	0.85221	0.0332708	1.5	0.05621	2.608	2.606	1.751	9.503	0.08	-0.49123	48.8304	1.02635	965.713	-2.18673	88.1021	0	0	NA	NA	NA	NA	0	NA	NA	NA	3.74537e-05	7292931	1.44682	NA	NA
2021-03-18 23:20:00	OP-UW	UA-100m	MC	451.591	55.506	6.40734	0.85221	0.0332708	1.5	0.05621	2.608	2.606	1.751	9.503	0.08	-0.49123	48.8304	1.02635	965.713	-2.18673	88.1021	0	0	NA	NA	NA	NA	0	NA	NA	NA	NA	0	1.42725	NA	NA
2021-03-18 23:20:00	OP-100m	UA-150m	MC	451.591	51.127	5.24021	0.892375	0.0269497	4.9	5.638e-05	2.93	2.547	1.543	6.915	0.08	-0.49123	48.8304	1.02635	965.713	-2.18673	88.1021	0	0	NA	NA	NA	NA	0	NA	NA	NA	4.13607e-05	3074350	1.46041	NA	NA
2021-03-18 23:20:00	OP-150m	UA-150m	MC	451.591	51.127	5.24021	0.892375	0.0269497	4.9	5.638e-05	2.93	2.547	1.543	6.915	0.08	-0.49123	48.8304	1.02635	965.713	-2.18673	88.1021	0	0	NA	NA	NA	NA	0	NA	NA	NA	3.98437e-05	2853281	1.4313	NA	NA
2021-03-18 23:20:00	OP-200m	UA-150m	MC	451.591	51.127	5.24021	0.892375	0.0269497	4.9	5.638e-05	2.93	2.547	1.543	6.915	0.08	-0.49123	48.8304	1.02635	965.713	-2.18673	88.1021	0	0	NA	NA	NA	NA	0	NA	NA	NA	3.86981e-05	2511020	1.44722	NA	NA
2021-03-18 23:20:00	OP-50m	UA-150m	MC	451.591	51.127	5.24021	0.892375	0.0269497	4.9	5.638e-05	2.93	2.547	1.543	6.915	0.08	-0.49123	48.8304	1.02635	965.713	-2.18673	88.1021	0	0	NA	NA	NA	NA	0	NA	NA	NA	4.33929e-05	3176600	1.44682	NA	NA
2021-03-18 23:20:00	OP-UW	UA-150m	MC	451.591	51.127	5.24021	0.892375	0.0269497	4.9	5.638e-05	2.93	2.547	1.543	6.915	0.08	-0.49123	48.8304	1.02635	965.713	-2.18673	88.1021	0	0	NA	NA	NA	NA	0	NA	NA	NA	NA	0	1.42725	NA	NA
2021-03-18 23:30:00	OP-100m	UA-UW	MC	451.591	54.64	13.3992	0.647524	0.0425908	4.9	0.03246	2.366	3.126	1.233	4.297	0.2	-0.392654	50.4908	0.746538	965.613	-2.12654	88.2612	0	0	NA	NA	NA	NA	0	NA	NA	NA	3.0936e-05	4289877	1.42678	NA	NA
2021-03-18 23:30:00	OP-150m	UA-UW	MC	451.591	54.64	13.3992	0.647524	0.0425908	4.9	0.03246	2.366	3.126	1.233	4.297	0.2	-0.392654	50.4908	0.746538	965.613	-2.12654	88.2612	0	0	NA	NA	NA	NA	0	NA	NA	NA	2.90913e-05	3401032	1.40307	NA	NA
2021-03-18 23:30:00	OP-200m	UA-UW	MC	451.591	54.64	13.3992	0.647524	0.0425908	4.9	0.03246	2.366	3.126	1.233	4.297	0.2	-0.392654	50.4908	0.746538	965.613	-2.12654	88.2612	0	0	NA	NA	NA	NA	0	NA	NA	NA	2.21578e-05	2556643	1.41268	NA	NA
2021-03-18 23:30:00	OP-50m	UA-UW	MC	451.591	54.64	13.3992	0.647524	0.0425908	4.9	0.03246	2.366	3.126	1.233	4.297	0.2	-0.392654	50.4908	0.746538	965.613	-2.12654	88.2612	0	0	NA	NA	NA	NA	0	NA	NA	NA	3.83189e-05	5667119	1.41834	NA	NA
2021-03-18 23:30:00	OP-UW	UA-UW	MC	451.591	54.64	13.3992	0.647524	0.0425908	4.9	0.03246	2.366	3.126	1.233	4.297	0.2	-0.392654	50.4908	0.746538	965.613	-2.12654	88.2612	0	0	NA	NA	NA	NA	0	NA	NA	NA	NA	0	1.4173	NA	NA
2021-03-18 23:30:00	OP-100m	UA-100m	MC	451.591	52.616	8.28656	0.630223	0.0410765	5.1	0.0318	2.884	1.984	1.153	3.84	0.08	-0.392654	50.4908	0.746538	965.613	-2.12654	88.2612	0	0	NA	NA	NA	NA	0	NA	NA	NA	3.52484e-05	4150751	1.42678	NA	NA
2021-03-18 23:30:00	OP-150m	UA-100m	MC	451.591	52.616	8.28656	0.630223	0.0410765	5.1	0.0318	2.884	1.984	1.153	3.84	0.08	-0.392654	50.4908	0.746538	965.613	-2.12654	88.2612	0	0	NA	NA	NA	NA	0	NA	NA	NA	3.19113e-05	3421812	1.40307	NA	NA
2021-03-18 23:30:00	OP-200m	UA-100m	MC	451.591	52.616	8.28656	0.630223	0.0410765	5.1	0.0318	2.884	1.984	1.153	3.84	0.08	-0.392654	50.4908	0.746538	965.613	-2.12654	88.2612	0	0	NA	NA	NA	NA	0	NA	NA	NA	2.81977e-05	2899181	1.41268	NA	NA
2021-03-18 23:30:00	OP-50m	UA-100m	MC	451.591	52.616	8.28656	0.630223	0.0410765	5.1	0.0318	2.884	1.984	1.153	3.84	0.08	-0.392654	50.4908	0.746538	965.613	-2.12654	88.2612	0	0	NA	NA	NA	NA	0	NA	NA	NA	3.77712e-05	5375544	1.41834	NA	NA
2021-03-18 23:30:00	OP-UW	UA-100m	MC	451.591	52.616	8.28656	0.630223	0.0410765	5.1	0.0318	2.884	1.984	1.153	3.84	0.08	-0.392654	50.4908	0.746538	965.613	-2.12654	88.2612	0	0	NA	NA	NA	NA	0	NA	NA	NA	NA	0	1.4173	NA	NA
2021-03-18 23:30:00	OP-100m	UA-150m	MC	451.591	50.983	7.38138	0.626432	0.0146302	0.3	1.025	6.511	4.871	2.835	37.021	0.08	-0.392654	50.4908	0.746538	965.613	-2.12654	88.2612	0	0	NA	NA	NA	NA	0	NA	NA	NA	8.68978e-05	15429856	1.42678	NA	NA
2021-03-18 23:30:00	OP-150m	UA-150m	MC	451.591	50.983	7.38138	0.626432	0.0146302	0.3	1.025	6.511	4.871	2.835	37.021	0.08	-0.392654	50.4908	0.746538	965.613	-2.12654	88.2612	0	0	NA	NA	NA	NA	0	NA	NA	NA	7.87014e-05	12512681	1.40307	NA	NA
2021-03-18 23:30:00	OP-200m	UA-150m	MC	451.591	50.983	7.38138	0.626432	0.0146302	0.3	1.025	6.511	4.871	2.835	37.021	0.08	-0.392654	50.4908	0.746538	965.613	-2.12654	88.2612	0	0	NA	NA	NA	NA	0	NA	NA	NA	7.04693e-05	10602574	1.41268	NA	NA
2021-03-18 23:30:00	OP-50m	UA-150m	MC	451.591	50.983	7.38138	0.626432	0.0146302	0.3	1.025	6.511	4.871	2.835	37.021	0.08	-0.392654	50.4908	0.746538	965.613	-2.12654	88.2612	0	0	NA	NA	NA	NA	0	NA	NA	NA	0.000101605	20864045	1.41834	NA	NA
2021-03-18 23:30:00	OP-UW	UA-150m	MC	451.591	50.983	7.38138	0.626432	0.0146302	0.3	1.025	6.511	4.871	2.835	37.021	0.08	-0.392654	50.4908	0.746538	965.613	-2.12654	88.2612	0	0	NA	NA	NA	NA	0	NA	NA	NA	NA	0	1.4173	NA	NA
2021-03-18 23:40:00	OP-100m	UA-UW	MC	451.591	19.699	11.5928	0.87192	0.0589638	108.1	0.005986	3.161	2.745	1.348	5.106	0.2	-0.407346	348.199	0.271846	965.513	-1.87654	89.854	0	0	NA	NA	NA	NA	0	NA	NA	NA	1.13007e-05	1345044	1.44513	NA	NA
2021-03-18 23:40:00	OP-150m	UA-UW	MC	451.591	19.699	11.5928	0.87192	0.0589638	108.1	0.005986	3.161	2.745	1.348	5.106	0.2	-0.407346	348.199	0.271846	965.513	-1.87654	89.854	0	0	NA	NA	NA	NA	0	NA	NA	NA	3.73643e-06	201050	1.41752	NA	NA
2021-03-18 23:40:00	OP-200m	UA-UW	MC	451.591	19.699	11.5928	0.87192	0.0589638	108.1	0.005986	3.161	2.745	1.348	5.106	0.2	-0.407346	348.199	0.271846	965.513	-1.87654	89.854	0	0	NA	NA	NA	NA	0	NA	NA	NA	1.57461e-06	27968	1.42124	NA	NA
2021-03-18 23:40:00	OP-50m	UA-UW	MC	451.591	19.699	11.5928	0.87192	0.0589638	108.1	0.005986	3.161	2.745	1.348	5.106	0.2	-0.407346	348.199	0.271846	965.513	-1.87654	89.854	0	0	NA	NA	NA	NA	0	NA	NA	NA	2.09587e-05	3905173	1.43114	NA	NA
2021-03-18 23:40:00	OP-UW	UA-UW	MC	451.591	19.699	11.5928	0.87192	0.0589638	108.1	0.005986	3.161	2.745	1.348	5.106	0.2	-0.407346	348.199	0.271846	965.513	-1.87654	89.854	0	0	NA	NA	NA	NA	0	NA	NA	NA	NA	0	1.43533	NA	NA
2021-03-18 23:50:00	OP-100m	UA-UW	MC	451.591	25.025	14.9843	0.608171	0.0544198	30.3	0.0318	2.878	2.115	1.36	5.201	0.2	-0.474692	353.944	0.509385	965.377	-1.96019	89.4123	0	0	NA	NA	NA	NA	0	NA	NA	NA	1.66984e-05	2718165	1.43703	NA	NA
2021-03-18 23:50:00	OP-150m	UA-UW	MC	451.591	25.025	14.9843	0.608171	0.0544198	30.3	0.0318	2.878	2.115	1.36	5.201	0.2	-0.474692	353.944	0.509385	965.377	-1.96019	89.4123	0	0	NA	NA	NA	NA	0	NA	NA	NA	8.87407e-06	820766	1.41015	NA	NA
2021-03-18 23:50:00	OP-200m	UA-UW	MC	451.591	25.025	14.9843	0.608171	0.0544198	30.3	0.0318	2.878	2.115	1.36	5.201	0.2	-0.474692	353.944	0.509385	965.377	-1.96019	89.4123	0	0	NA	NA	NA	NA	0	NA	NA	NA	2.36795e-06	113652	1.41965	NA	NA
2021-03-18 23:50:00	OP-50m	UA-UW	MC	451.591	25.025	14.9843	0.608171	0.0544198	30.3	0.0318	2.878	2.115	1.36	5.201	0.2	-0.474692	353.944	0.509385	965.377	-1.96019	89.4123	0	0	NA	NA	NA	NA	0	NA	NA	NA	2.22698e-05	4650678	1.43166	NA	NA
2021-03-18 23:50:00	OP-UW	UA-UW	MC	451.591	25.025	14.9843	0.608171	0.0544198	30.3	0.0318	2.878	2.115	1.36	5.201	0.2	-0.474692	353.944	0.509385	965.377	-1.96019	89.4123	0	0	NA	NA	NA	NA	0	NA	NA	NA	NA	0	1.43351	NA	NA
2021-03-18 23:50:00	OP-100m	UA-100m	MC	451.591	9.049	41.657	0.48742	0.0300082	3.3	0.06197	3.543	2.575	1.52	6.672	0.08	-0.474692	353.944	0.509385	965.377	-1.96019	89.4123	0	0	NA	NA	NA	NA	0	NA	NA	NA	9.46986e-07	16777	1.43703	NA	NA
2021-03-18 23:50:00	OP-150m	UA-100m	MC	451.591	9.049	41.657	0.48742	0.0300082	3.3	0.06197	3.543	2.575	1.52	6.672	0.08	-0.474692	353.944	0.509385	965.377	-1.96019	89.4123	0	0	NA	NA	NA	NA	0	NA	NA	NA	NA	0	1.41015	NA	NA
2021-03-18 23:50:00	OP-200m	UA-100m	MC	451.591	9.049	41.657	0.48742	0.0300082	3.3	0.06197	3.543	2.575	1.52	6.672	0.08	-0.474692	353.944	0.509385	965.377	-1.96019	89.4123	0	0	NA	NA	NA	NA	0	NA	NA	NA	NA	0	1.41965	NA	NA
2021-03-18 23:50:00	OP-50m	UA-100m	MC	451.591	9.049	41.657	0.48742	0.0300082	3.3	0.06197	3.543	2.575	1.52	6.672	0.08	-0.474692	353.944	0.509385	965.377	-1.96019	89.4123	0	0	NA	NA	NA	NA	0	NA	NA	NA	4.03132e-05	6162491	1.43166	NA	NA
2021-03-18 23:50:00	OP-UW	UA-100m	MC	451.591	9.049	41.657	0.48742	0.0300082	3.3	0.06197	3.543	2.575	1.52	6.672	0.08	-0.474692	353.944	0.509385	965.377	-1.96019	89.4123	0	0	NA	NA	NA	NA	0	NA	NA	NA	NA	0	1.43351	NA	NA
2021-03-18 23:50:00	OP-100m	UA-150m	MC	451.591	359.727	22.6936	0.573666	0.0278758	2	0.07439	4.987	4.546	1.745	9.419	0.08	-0.474692	353.944	0.509385	965.377	-1.96019	89.4123	0	0	NA	NA	NA	NA	0	NA	NA	NA	2.06983e-06	12639	1.43703	NA	NA
2021-03-18 23:50:00	OP-150m	UA-150m	MC	451.591	359.727	22.6936	0.573666	0.0278758	2	0.07439	4.987	4.546	1.745	9.419	0.08	-0.474692	353.944	0.509385	965.377	-1.96019	89.4123	0	0	NA	NA	NA	NA	0	NA	NA	NA	NA	0	1.41015	NA	NA
2021-03-18 23:50:00	OP-200m	UA-150m	MC	451.591	359.727	22.6936	0.573666	0.0278758	2	0.07439	4.987	4.546	1.745	9.419	0.08	-0.474692	353.944	0.509385	965.377	-1.96019	89.4123	0	0	NA	NA	NA	NA	0	NA	NA	NA	NA	0	1.41965	NA	NA
2021-03-18 23:50:00	OP-50m	UA-150m	MC	451.591	359.727	22.6936	0.573666	0.0278758	2	0.07439	4.987	4.546	1.745	9.419	0.08	-0.474692	353.944	0.509385	965.377	-1.96019	89.4123	0	0	NA	NA	NA	NA	0	NA	NA	NA	2.18976e-05	2605911	1.43166	NA	NA
2021-03-18 23:50:00	OP-UW	UA-150m	MC	451.591	359.727	22.6936	0.573666	0.0278758	2	0.07439	4.987	4.546	1.745	9.419	0.08	-0.474692	353.944	0.509385	965.377	-1.96019	89.4123	0	0	NA	NA	NA	NA	0	NA	NA	NA	NA	0	1.43351	NA	NA
2021-03-19 00:10:00	OP-100m	UA-100m	MC	451.591	35.982	35.6119	0.405186	0.0195537	1	0.5881	7.419	6.102	2.322	20.72	0.08	-0.4	0.787291	0.585923	965.2	-2.2	87.5133	0	0	NA	NA	NA	NA	0	NA	NA	NA	5.52092e-05	9807600	1.46664	NA	NA
2021-03-19 00:10:00	OP-150m	UA-100m	MC	451.591	35.982	35.6119	0.405186	0.0195537	1	0.5881	7.419	6.102	2.322	20.72	0.08	-0.4	0.787291	0.585923	965.2	-2.2	87.5133	0	0	NA	NA	NA	NA	0	NA	NA	NA	5.12367e-05	7638004	1.45828	NA	NA
2021-03-19 00:10:00	OP-200m	UA-100m	MC	451.591	35.982	35.6119	0.405186	0.0195537	1	0.5881	7.419	6.102	2.322	20.72	0.08	-0.4	0.787291	0.585923	965.2	-2.2	87.5133	0	0	NA	NA	NA	NA	0	NA	NA	NA	4.59488e-05	5921379	1.48964	NA	NA
2021-03-19 00:10:00	OP-50m	UA-100m	MC	451.591	35.982	35.6119	0.405186	0.0195537	1	0.5881	7.419	6.102	2.322	20.72	0.08	-0.4	0.787291	0.585923	965.2	-2.2	87.5133	0	0	NA	NA	NA	NA	0	NA	NA	NA	6.59736e-05	13643815	1.46029	NA	NA
2021-03-19 00:10:00	OP-UW	UA-100m	MC	451.591	35.982	35.6119	0.405186	0.0195537	1	0.5881	7.419	6.102	2.322	20.72	0.08	-0.4	0.787291	0.585923	965.2	-2.2	87.5133	0	0	NA	NA	NA	NA	0	NA	NA	NA	NA	0	1.43717	NA	NA
2021-03-19 00:10:00	OP-100m	UA-150m	MC	451.591	39.509	30.575	0.470354	0.0329043	4.1	0.07603	3.503	3.866	1.318	4.877	0.08	-0.4	0.787291	0.585923	965.2	-2.2	87.5133	0	0	NA	NA	NA	NA	0	NA	NA	NA	4.12453e-05	4842524	1.46664	NA	NA
2021-03-19 00:10:00	OP-150m	UA-150m	MC	451.591	39.509	30.575	0.470354	0.0329043	4.1	0.07603	3.503	3.866	1.318	4.877	0.08	-0.4	0.787291	0.585923	965.2	-2.2	87.5133	0	0	NA	NA	NA	NA	0	NA	NA	NA	3.46578e-05	3800607	1.45828	NA	NA
2021-03-19 00:10:00	OP-200m	UA-150m	MC	451.591	39.509	30.575	0.470354	0.0329043	4.1	0.07603	3.503	3.866	1.318	4.877	0.08	-0.4	0.787291	0.585923	965.2	-2.2	87.5133	0	0	NA	NA	NA	NA	0	NA	NA	NA	3.13949e-05	3072950	1.48964	NA	NA
2021-03-19 00:10:00	OP-50m	UA-150m	MC	451.591	39.509	30.575	0.470354	0.0329043	4.1	0.07603	3.503	3.866	1.318	4.877	0.08	-0.4	0.787291	0.585923	965.2	-2.2	87.5133	0	0	NA	NA	NA	NA	0	NA	NA	NA	4.65397e-05	6518002	1.46029	NA	NA
2021-03-19 00:10:00	OP-UW	UA-150m	MC	451.591	39.509	30.575	0.470354	0.0329043	4.1	0.07603	3.503	3.866	1.318	4.877	0.08	-0.4	0.787291	0.585923	965.2	-2.2	87.5133	0	0	NA	NA	NA	NA	0	NA	NA	NA	NA	0	1.43717	NA	NA
2021-03-19 00:20:00	OP-100m	UA-UW	MC	451.591	89.211	16.3535	0.557208	0.0305689	2.1	0.1183	5.372	4.53	2.189	17.513	0.2	-0.353269	68.8093	0.482654	965.2	-2.2	87.0296	0	0	NA	NA	NA	NA	0	NA	NA	NA	4.14668e-06	5975	1.43112	NA	NA
2021-03-19 00:20:00	OP-150m	UA-UW	MC	451.591	89.211	16.3535	0.557208	0.0305689	2.1	0.1183	5.372	4.53	2.189	17.513	0.2	-0.353269	68.8093	0.482654	965.2	-2.2	87.0296	0	0	NA	NA	NA	NA	0	NA	NA	NA	NA	0	1.41183	NA	NA
2021-03-19 00:20:00	OP-200m	UA-UW	MC	451.591	89.211	16.3535	0.557208	0.0305689	2.1	0.1183	5.372	4.53	2.189	17.513	0.2	-0.353269	68.8093	0.482654	965.2	-2.2	87.0296	0	0	NA	NA	NA	NA	0	NA	NA	NA	NA	0	1.43136	NA	NA
2021-03-19 00:20:00	OP-50m	UA-UW	MC	451.591	89.211	16.3535	0.557208	0.0305689	2.1	0.1183	5.372	4.53	2.189	17.513	0.2	-0.353269	68.8093	0.482654	965.2	-2.2	87.0296	0	0	NA	NA	NA	NA	0	NA	NA	NA	2.17873e-05	3535096	1.42905	NA	NA
2021-03-19 00:20:00	OP-UW	UA-UW	MC	451.591	89.211	16.3535	0.557208	0.0305689	2.1	0.1183	5.372	4.53	2.189	17.513	0.2	-0.353269	68.8093	0.482654	965.2	-2.2	87.0296	0	0	NA	NA	NA	NA	0	NA	NA	NA	NA	0	1.42956	NA	NA
2021-03-19 00:20:00	OP-100m	UA-100m	MC	451.591	86.928	21.0857	0.566029	0.024342	0.7	0.9311	6.081	7.194	2.524	26.361	0.08	-0.353269	68.8093	0.482654	965.2	-2.2	87.0296	0	0	NA	NA	NA	NA	0	NA	NA	NA	4.09041e-06	164631	1.43112	NA	NA
2021-03-19 00:20:00	OP-150m	UA-100m	MC	451.591	86.928	21.0857	0.566029	0.024342	0.7	0.9311	6.081	7.194	2.524	26.361	0.08	-0.353269	68.8093	0.482654	965.2	-2.2	87.0296	0	0	NA	NA	NA	NA	0	NA	NA	NA	1.00658e-07	512	1.41183	NA	NA
2021-03-19 00:20:00	OP-200m	UA-100m	MC	451.591	86.928	21.0857	0.566029	0.024342	0.7	0.9311	6.081	7.194	2.524	26.361	0.08	-0.353269	68.8093	0.482654	965.2	-2.2	87.0296	0	0	NA	NA	NA	NA	0	NA	NA	NA	NA	0	1.43136	NA	NA
2021-03-19 00:20:00	OP-50m	UA-100m	MC	451.591	86.928	21.0857	0.566029	0.024342	0.7	0.9311	6.081	7.194	2.524	26.361	0.08	-0.353269	68.8093	0.482654	965.2	-2.2	87.0296	0	0	NA	NA	NA	NA	0	NA	NA	NA	3.59902e-05	8290655	1.42905	NA	NA
2021-03-19 00:20:00	OP-UW	UA-100m	MC	451.591	86.928	21.0857	0.566029	0.024342	0.7	0.9311	6.081	7.194	2.524	26.361	0.08	-0.353269	68.8093	0.482654	965.2	-2.2	87.0296	0	0	NA	NA	NA	NA	0	NA	NA	NA	NA	0	1.42956	NA	NA
2021-03-19 00:20:00	OP-100m	UA-150m	MC	451.591	81.103	22.4467	0.553568	0.0154227	0.5	0.6605	9.684	11.288	3.815	89.258	0.08	-0.353269	68.8093	0.482654	965.2	-2.2	87.0296	0	0	NA	NA	NA	NA	0	NA	NA	NA	1.2128e-05	1061831	1.43112	NA	NA
2021-03-19 00:20:00	OP-150m	UA-150m	MC	451.591	81.103	22.4467	0.553568	0.0154227	0.5	0.6605	9.684	11.288	3.815	89.258	0.08	-0.353269	68.8093	0.482654	965.2	-2.2	87.0296	0	0	NA	NA	NA	NA	0	NA	NA	NA	1.41072e-06	18053	1.41183	NA	NA
2021-03-19 00:20:00	OP-200m	UA-150m	MC	451.591	81.103	22.4467	0.553568	0.0154227	0.5	0.6605	9.684	11.288	3.815	89.258	0.08	-0.353269	68.8093	0.482654	965.2	-2.2	87.0296	0	0	NA	NA	NA	NA	0	NA	NA	NA	7.81044e-08	202	1.43136	NA	NA
2021-03-19 00:20:00	OP-50m	UA-150m	MC	451.591	81.103	22.4467	0.553568	0.0154227	0.5	0.6605	9.684	11.288	3.815	89.258	0.08	-0.353269	68.8093	0.482654	965.2	-2.2	87.0296	0	0	NA	NA	NA	NA	0	NA	NA	NA	5.64952e-05	14129726	1.42905	NA	NA
2021-03-19 00:20:00	OP-UW	UA-150m	MC	451.591	81.103	22.4467	0.553568	0.0154227	0.5	0.6605	9.684	11.288	3.815	89.258	0.08	-0.353269	68.8093	0.482654	965.2	-2.2	87.0296	0	0	NA	NA	NA	NA	0	NA	NA	NA	NA	0	1.42956	NA	NA
2021-03-19 00:30:00	OP-100m	UA-UW	MC	451.591	56.465	16.8412	0.852156	0.0504241	26.1	0.003387	3.166	2.168	1.304	4.775	0.2	-0.356731	83.0537	0.576731	965.2	-2.2	87.4438	0	0	NA	NA	NA	NA	0	NA	NA	NA	2.17189e-05	2878929	1.43587	NA	NA
2021-03-19 00:30:00	OP-150m	UA-UW	MC	451.591	56.465	16.8412	0.852156	0.0504241	26.1	0.003387	3.166	2.168	1.304	4.775	0.2	-0.356731	83.0537	0.576731	965.2	-2.2	87.4438	0	0	NA	NA	NA	NA	0	NA	NA	NA	1.92065e-05	2205424	1.41155	NA	NA
2021-03-19 00:30:00	OP-200m	UA-UW	MC	451.591	56.465	16.8412	0.852156	0.0504241	26.1	0.003387	3.166	2.168	1.304	4.775	0.2	-0.356731	83.0537	0.576731	965.2	-2.2	87.4438	0	0	NA	NA	NA	NA	0	NA	NA	NA	1.49956e-05	1598380	1.41969	NA	NA
2021-03-19 00:30:00	OP-50m	UA-UW	MC	451.591	56.465	16.8412	0.852156	0.0504241	26.1	0.003387	3.166	2.168	1.304	4.775	0.2	-0.356731	83.0537	0.576731	965.2	-2.2	87.4438	0	0	NA	NA	NA	NA	0	NA	NA	NA	2.64055e-05	4053283	1.43126	NA	NA
2021-03-19 00:30:00	OP-UW	UA-UW	MC	451.591	56.465	16.8412	0.852156	0.0504241	26.1	0.003387	3.166	2.168	1.304	4.775	0.2	-0.356731	83.0537	0.576731	965.2	-2.2	87.4438	0	0	NA	NA	NA	NA	0	NA	NA	NA	NA	0	1.42858	NA	NA
2021-03-19 00:30:00	OP-100m	UA-100m	MC	451.591	66.311	13.5538	0.688932	0.0211306	0.6	0.5877	5.774	4.981	2.713	32.54	0.08	-0.356731	83.0537	0.576731	965.2	-2.2	87.4438	0	0	NA	NA	NA	NA	0	NA	NA	NA	4.66729e-05	10419441	1.43587	NA	NA
2021-03-19 00:30:00	OP-150m	UA-100m	MC	451.591	66.311	13.5538	0.688932	0.0211306	0.6	0.5877	5.774	4.981	2.713	32.54	0.08	-0.356731	83.0537	0.576731	965.2	-2.2	87.4438	0	0	NA	NA	NA	NA	0	NA	NA	NA	1.46587e-05	1799210	1.41155	NA	NA
2021-03-19 00:30:00	OP-200m	UA-100m	MC	451.591	66.311	13.5538	0.688932	0.0211306	0.6	0.5877	5.774	4.981	2.713	32.54	0.08	-0.356731	83.0537	0.576731	965.2	-2.2	87.4438	0	0	NA	NA	NA	NA	0	NA	NA	NA	7.53082e-07	13998	1.41969	NA	NA
2021-03-19 00:30:00	OP-50m	UA-100m	MC	451.591	66.311	13.5538	0.688932	0.0211306	0.6	0.5877	5.774	4.981	2.713	32.54	0.08	-0.356731	83.0537	0.576731	965.2	-2.2	87.4438	0	0	NA	NA	NA	NA	0	NA	NA	NA	5.97656e-05	15490086	1.43126	NA	NA
2021-03-19 00:30:00	OP-UW	UA-100m	MC	451.591	66.311	13.5538	0.688932	0.0211306	0.6	0.5877	5.774	4.981	2.713	32.54	0.08	-0.356731	83.0537	0.576731	965.2	-2.2	87.4438	0	0	NA	NA	NA	NA	0	NA	NA	NA	NA	0	1.42858	NA	NA
2021-03-19 00:30:00	OP-100m	UA-150m	MC	451.591	68.985	9.53276	0.715503	0.0268009	1.8	0.01258	3.972	3.318	2.014	13.865	0.08	-0.356731	83.0537	0.576731	965.2	-2.2	87.4438	0	0	NA	NA	NA	NA	0	NA	NA	NA	2.9449e-05	4294075	1.43587	NA	NA
2021-03-19 00:30:00	OP-150m	UA-150m	MC	451.591	68.985	9.53276	0.715503	0.0268009	1.8	0.01258	3.972	3.318	2.014	13.865	0.08	-0.356731	83.0537	0.576731	965.2	-2.2	87.4438	0	0	NA	NA	NA	NA	0	NA	NA	NA	4.20984e-06	162573	1.41155	NA	NA
2021-03-19 00:30:00	OP-200m	UA-150m	MC	451.591	68.985	9.53276	0.715503	0.0268009	1.8	0.01258	3.972	3.318	2.014	13.865	0.08	-0.356731	83.0537	0.576731	965.2	-2.2	87.4438	0	0	NA	NA	NA	NA	0	NA	NA	NA	3.93486e-09	11	1.41969	NA	NA
2021-03-19 00:30:00	OP-50m	UA-150m	MC	451.591	68.985	9.53276	0.715503	0.0268009	1.8	0.01258	3.972	3.318	2.014	13.865	0.08	-0.356731	83.0537	0.576731	965.2	-2.2	87.4438	0	0	NA	NA	NA	NA	0	NA	NA	NA	4.38771e-05	7351312	1.43126	NA	NA
2021-03-19 00:30:00	OP-UW	UA-150m	MC	451.591	68.985	9.53276	0.715503	0.0268009	1.8	0.01258	3.972	3.318	2.014	13.865	0.08	-0.356731	83.0537	0.576731	965.2	-2.2	87.4438	0	0	NA	NA	NA	NA	0	NA	NA	NA	NA	0	1.42858	NA	NA
2021-03-19 00:40:00	OP-100m	UA-UW	MC	451.591	40.419	13.2073	1.12382	0.108217	51.5	0.03828	2.687	1.797	1.178	3.974	0.2	-0.4	60.3477	0.479193	965.113	-2.2	87.9367	0	0	NA	NA	NA	NA	0	NA	NA	NA	9.84739e-06	2695039	1.43222	NA	NA
2021-03-19 00:40:00	OP-150m	UA-UW	MC	451.591	40.419	13.2073	1.12382	0.108217	51.5	0.03828	2.687	1.797	1.178	3.974	0.2	-0.4	60.3477	0.479193	965.113	-2.2	87.9367	0	0	NA	NA	NA	NA	0	NA	NA	NA	9.33985e-06	2045914	1.41026	NA	NA
2021-03-19 00:40:00	OP-200m	UA-UW	MC	451.591	40.419	13.2073	1.12382	0.108217	51.5	0.03828	2.687	1.797	1.178	3.974	0.2	-0.4	60.3477	0.479193	965.113	-2.2	87.9367	0	0	NA	NA	NA	NA	0	NA	NA	NA	7.7388e-06	1651917	1.4255	NA	NA
2021-03-19 00:40:00	OP-50m	UA-UW	MC	451.591	40.419	13.2073	1.12382	0.108217	51.5	0.03828	2.687	1.797	1.178	3.974	0.2	-0.4	60.3477	0.479193	965.113	-2.2	87.9367	0	0	NA	NA	NA	NA	0	NA	NA	NA	1.19444e-05	4173354	1.43277	NA	NA
2021-03-19 00:40:00	OP-UW	UA-UW	MC	451.591	40.419	13.2073	1.12382	0.108217	51.5	0.03828	2.687	1.797	1.178	3.974	0.2	-0.4	60.3477	0.479193	965.113	-2.2	87.9367	0	0	NA	NA	NA	NA	0	NA	NA	NA	NA	0	1.43041	NA	NA
2021-03-19 00:50:00	OP-100m	UA-UW	MC	451.591	66.954	9.86442	1.14408	0.068515	52.8	0.003063	3.862	2.741	1.68	8.539	0.2	-0.44673	106.889	0.727729	965.013	-2.16327	88.4408	0	0	NA	NA	NA	NA	0	NA	NA	NA	1.0096e-05	2260643	1.45379	NA	NA
2021-03-19 00:50:00	OP-150m	UA-UW	MC	451.591	66.954	9.86442	1.14408	0.068515	52.8	0.003063	3.862	2.741	1.68	8.539	0.2	-0.44673	106.889	0.727729	965.013	-2.16327	88.4408	0	0	NA	NA	NA	NA	0	NA	NA	NA	4.48216e-06	495321	1.42892	NA	NA
2021-03-19 00:50:00	OP-200m	UA-UW	MC	451.591	66.954	9.86442	1.14408	0.068515	52.8	0.003063	3.862	2.741	1.68	8.539	0.2	-0.44673	106.889	0.727729	965.013	-2.16327	88.4408	0	0	NA	NA	NA	NA	0	NA	NA	NA	1.37173e-06	55119	1.44102	NA	NA
2021-03-19 00:50:00	OP-50m	UA-UW	MC	451.591	66.954	9.86442	1.14408	0.068515	52.8	0.003063	3.862	2.741	1.68	8.539	0.2	-0.44673	106.889	0.727729	965.013	-2.16327	88.4408	0	0	NA	NA	NA	NA	0	NA	NA	NA	1.49242e-05	4279248	1.4477	NA	NA
2021-03-19 00:50:00	OP-UW	UA-UW	MC	451.591	66.954	9.86442	1.14408	0.068515	52.8	0.003063	3.862	2.741	1.68	8.539	0.2	-0.44673	106.889	0.727729	965.013	-2.16327	88.4408	0	0	NA	NA	NA	NA	0	NA	NA	NA	NA	0	1.43137	NA	NA
2021-03-19 00:50:00	OP-100m	UA-100m	MC	451.591	103.93	10.9831	1.10865	0.062455	16.1	0.003265	3.281	2.384	1.245	4.373	0.08	-0.44673	106.889	0.727729	965.013	-2.16327	88.4408	0	0	NA	NA	NA	NA	0	NA	NA	NA	NA	0	1.45379	NA	NA
2021-03-19 00:50:00	OP-150m	UA-100m	MC	451.591	103.93	10.9831	1.10865	0.062455	16.1	0.003265	3.281	2.384	1.245	4.373	0.08	-0.44673	106.889	0.727729	965.013	-2.16327	88.4408	0	0	NA	NA	NA	NA	0	NA	NA	NA	NA	0	1.42892	NA	NA
2021-03-19 00:50:00	OP-200m	UA-100m	MC	451.591	103.93	10.9831	1.10865	0.062455	16.1	0.003265	3.281	2.384	1.245	4.373	0.08	-0.44673	106.889	0.727729	965.013	-2.16327	88.4408	0	0	NA	NA	NA	NA	0	NA	NA	NA	NA	0	1.44102	NA	NA
2021-03-19 00:50:00	OP-50m	UA-100m	MC	451.591	103.93	10.9831	1.10865	0.062455	16.1	0.003265	3.281	2.384	1.245	4.373	0.08	-0.44673	106.889	0.727729	965.013	-2.16327	88.4408	0	0	NA	NA	NA	NA	0	NA	NA	NA	2.6277e-07	3952	1.4477	NA	NA
2021-03-19 00:50:00	OP-UW	UA-100m	MC	451.591	103.93	10.9831	1.10865	0.062455	16.1	0.003265	3.281	2.384	1.245	4.373	0.08	-0.44673	106.889	0.727729	965.013	-2.16327	88.4408	0	0	NA	NA	NA	NA	0	NA	NA	NA	NA	0	1.43137	NA	NA
2021-03-19 00:50:00	OP-100m	UA-150m	MC	451.591	105.58	11.3016	1.13745	0.0460057	4.6	0.0009767	3.824	3.108	1.732	9.237	0.08	-0.44673	106.889	0.727729	965.013	-2.16327	88.4408	0	0	NA	NA	NA	NA	0	NA	NA	NA	NA	0	1.45379	NA	NA
2021-03-19 00:50:00	OP-150m	UA-150m	MC	451.591	105.58	11.3016	1.13745	0.0460057	4.6	0.0009767	3.824	3.108	1.732	9.237	0.08	-0.44673	106.889	0.727729	965.013	-2.16327	88.4408	0	0	NA	NA	NA	NA	0	NA	NA	NA	NA	0	1.42892	NA	NA
2021-03-19 00:50:00	OP-200m	UA-150m	MC	451.591	105.58	11.3016	1.13745	0.0460057	4.6	0.0009767	3.824	3.108	1.732	9.237	0.08	-0.44673	106.889	0.727729	965.013	-2.16327	88.4408	0	0	NA	NA	NA	NA	0	NA	NA	NA	NA	0	1.44102	NA	NA
2021-03-19 00:50:00	OP-50m	UA-150m	MC	451.591	105.58	11.3016	1.13745	0.0460057	4.6	0.0009767	3.824	3.108	1.732	9.237	0.08	-0.44673	106.889	0.727729	965.013	-2.16327	88.4408	0	0	NA	NA	NA	NA	0	NA	NA	NA	7.45591e-08	176	1.4477	NA	NA
2021-03-19 00:50:00	OP-UW	UA-150m	MC	451.591	105.58	11.3016	1.13745	0.0460057	4.6	0.0009767	3.824	3.108	1.732	9.237	0.08	-0.44673	106.889	0.727729	965.013	-2.16327	88.4408	0	0	NA	NA	NA	NA	0	NA	NA	NA	NA	0	1.43137	NA	NA
2021-03-19 01:00:00	OP-100m	UA-UW	MC	451.591	65.395	9.39923	1.12747	0.0751734	19.8	0.008186	2.77	2.409	1.837	10.79	0.2	-0.58673	98.7369	0.861847	965	-2.06327	89.8142	0	0	NA	NA	NA	NA	0	NA	NA	NA	1.08249e-05	3262361	1.47881	NA	NA
2021-03-19 01:00:00	OP-150m	UA-UW	MC	451.591	65.395	9.39923	1.12747	0.0751734	19.8	0.008186	2.77	2.409	1.837	10.79	0.2	-0.58673	98.7369	0.861847	965	-2.06327	89.8142	0	0	NA	NA	NA	NA	0	NA	NA	NA	4.354e-06	869459	1.45402	NA	NA
2021-03-19 01:00:00	OP-200m	UA-UW	MC	451.591	65.395	9.39923	1.12747	0.0751734	19.8	0.008186	2.77	2.409	1.837	10.79	0.2	-0.58673	98.7369	0.861847	965	-2.06327	89.8142	0	0	NA	NA	NA	NA	0	NA	NA	NA	9.93898e-07	41842	1.46774	NA	NA
2021-03-19 01:00:00	OP-50m	UA-UW	MC	451.591	65.395	9.39923	1.12747	0.0751734	19.8	0.008186	2.77	2.409	1.837	10.79	0.2	-0.58673	98.7369	0.861847	965	-2.06327	89.8142	0	0	NA	NA	NA	NA	0	NA	NA	NA	1.36104e-05	5189591	1.47685	NA	NA
2021-03-19 01:00:00	OP-UW	UA-UW	MC	451.591	65.395	9.39923	1.12747	0.0751734	19.8	0.008186	2.77	2.409	1.837	10.79	0.2	-0.58673	98.7369	0.861847	965	-2.06327	89.8142	0	0	NA	NA	NA	NA	0	NA	NA	NA	NA	0	1.44728	NA	NA
2021-03-19 01:00:00	OP-100m	UA-100m	MC	451.591	92.593	12.0655	0.970025	0.0538736	8.5	0.00519	2.735	3.061	1.331	4.975	0.08	-0.58673	98.7369	0.861847	965	-2.06327	89.8142	0	0	NA	NA	NA	NA	0	NA	NA	NA	6.79409e-08	407	1.47881	NA	NA
2021-03-19 01:00:00	OP-150m	UA-100m	MC	451.591	92.593	12.0655	0.970025	0.0538736	8.5	0.00519	2.735	3.061	1.331	4.975	0.08	-0.58673	98.7369	0.861847	965	-2.06327	89.8142	0	0	NA	NA	NA	NA	0	NA	NA	NA	NA	0	1.45402	NA	NA
2021-03-19 01:00:00	OP-200m	UA-100m	MC	451.591	92.593	12.0655	0.970025	0.0538736	8.5	0.00519	2.735	3.061	1.331	4.975	0.08	-0.58673	98.7369	0.861847	965	-2.06327	89.8142	0	0	NA	NA	NA	NA	0	NA	NA	NA	NA	0	1.46774	NA	NA
2021-03-19 01:00:00	OP-50m	UA-100m	MC	451.591	92.593	12.0655	0.970025	0.0538736	8.5	0.00519	2.735	3.061	1.331	4.975	0.08	-0.58673	98.7369	0.861847	965	-2.06327	89.8142	0	0	NA	NA	NA	NA	0	NA	NA	NA	8.5532e-06	914678	1.47685	NA	NA
2021-03-19 01:00:00	OP-UW	UA-100m	MC	451.591	92.593	12.0655	0.970025	0.0538736	8.5	0.00519	2.735	3.061	1.331	4.975	0.08	-0.58673	98.7369	0.861847	965	-2.06327	89.8142	0	0	NA	NA	NA	NA	0	NA	NA	NA	NA	0	1.44728	NA	NA
2021-03-19 01:00:00	OP-100m	UA-150m	MC	451.591	91.388	14.2652	1.03696	0.0441661	4.4	0.001742	3.109	3.613	1.799	10.205	0.08	-0.58673	98.7369	0.861847	965	-2.06327	89.8142	0	0	NA	NA	NA	NA	0	NA	NA	NA	7.27559e-09	25	1.47881	NA	NA
2021-03-19 01:00:00	OP-150m	UA-150m	MC	451.591	91.388	14.2652	1.03696	0.0441661	4.4	0.001742	3.109	3.613	1.799	10.205	0.08	-0.58673	98.7369	0.861847	965	-2.06327	89.8142	0	0	NA	NA	NA	NA	0	NA	NA	NA	NA	0	1.45402	NA	NA
2021-03-19 01:00:00	OP-200m	UA-150m	MC	451.591	91.388	14.2652	1.03696	0.0441661	4.4	0.001742	3.109	3.613	1.799	10.205	0.08	-0.58673	98.7369	0.861847	965	-2.06327	89.8142	0	0	NA	NA	NA	NA	0	NA	NA	NA	NA	0	1.46774	NA	NA
2021-03-19 01:00:00	OP-50m	UA-150m	MC	451.591	91.388	14.2652	1.03696	0.0441661	4.4	0.001742	3.109	3.613	1.799	10.205	0.08	-0.58673	98.7369	0.861847	965	-2.06327	89.8142	0	0	NA	NA	NA	NA	0	NA	NA	NA	8.86596e-06	1191917	1.47685	NA	NA
2021-03-19 01:00:00	OP-UW	UA-150m	MC	451.591	91.388	14.2652	1.03696	0.0441661	4.4	0.001742	3.109	3.613	1.799	10.205	0.08	-0.58673	98.7369	0.861847	965	-2.06327	89.8142	0	0	NA	NA	NA	NA	0	NA	NA	NA	NA	0	1.44728	NA	NA
2021-03-19 01:10:00	OP-100m	UA-UW	MC	451.591	51.593	11.4413	1.30262	0.0808952	671.3	0.003289	2.723	3.004	1.491	6.376	0.2	-0.577962	75.3678	0.803461	965	-2.07346	89.2552	0	0	NA	NA	NA	NA	0	NA	NA	NA	1.09862e-05	2438417	1.48654	NA	NA
2021-03-19 01:10:00	OP-150m	UA-UW	MC	451.591	51.593	11.4413	1.30262	0.0808952	671.3	0.003289	2.723	3.004	1.491	6.376	0.2	-0.577962	75.3678	0.803461	965	-2.07346	89.2552	0	0	NA	NA	NA	NA	0	NA	NA	NA	1.03477e-05	1771582	1.46509	NA	NA
2021-03-19 01:10:00	OP-200m	UA-UW	MC	451.591	51.593	11.4413	1.30262	0.0808952	671.3	0.003289	2.723	3.004	1.491	6.376	0.2	-0.577962	75.3678	0.803461	965	-2.07346	89.2552	0	0	NA	NA	NA	NA	0	NA	NA	NA	8.05168e-06	1351717	1.4856	NA	NA
2021-03-19 01:10:00	OP-50m	UA-UW	MC	451.591	51.593	11.4413	1.30262	0.0808952	671.3	0.003289	2.723	3.004	1.491	6.376	0.2	-0.577962	75.3678	0.803461	965	-2.07346	89.2552	0	0	NA	NA	NA	NA	0	NA	NA	NA	1.40902e-05	3727764	1.48159	NA	NA
2021-03-19 01:10:00	OP-UW	UA-UW	MC	451.591	51.593	11.4413	1.30262	0.0808952	671.3	0.003289	2.723	3.004	1.491	6.376	0.2	-0.577962	75.3678	0.803461	965	-2.07346	89.2552	0	0	NA	NA	NA	NA	0	NA	NA	NA	NA	0	1.47159	NA	NA
2021-03-19 01:10:00	OP-100m	UA-100m	MC	451.591	61.702	13.5709	0.816917	0.0408034	3.2	0.01651	5.057	4.992	2.532	26.604	0.08	-0.577962	75.3678	0.803461	965	-2.07346	89.2552	0	0	NA	NA	NA	NA	0	NA	NA	NA	1.928e-05	6217577	1.48654	NA	NA
2021-03-19 01:10:00	OP-150m	UA-100m	MC	451.591	61.702	13.5709	0.816917	0.0408034	3.2	0.01651	5.057	4.992	2.532	26.604	0.08	-0.577962	75.3678	0.803461	965	-2.07346	89.2552	0	0	NA	NA	NA	NA	0	NA	NA	NA	1.36067e-05	3618556	1.46509	NA	NA
2021-03-19 01:10:00	OP-200m	UA-100m	MC	451.591	61.702	13.5709	0.816917	0.0408034	3.2	0.01651	5.057	4.992	2.532	26.604	0.08	-0.577962	75.3678	0.803461	965	-2.07346	89.2552	0	0	NA	NA	NA	NA	0	NA	NA	NA	7.95038e-06	1324688	1.4856	NA	NA
2021-03-19 01:10:00	OP-50m	UA-100m	MC	451.591	61.702	13.5709	0.816917	0.0408034	3.2	0.01651	5.057	4.992	2.532	26.604	0.08	-0.577962	75.3678	0.803461	965	-2.07346	89.2552	0	0	NA	NA	NA	NA	0	NA	NA	NA	2.43172e-05	8649518	1.48159	NA	NA
2021-03-19 01:10:00	OP-UW	UA-100m	MC	451.591	61.702	13.5709	0.816917	0.0408034	3.2	0.01651	5.057	4.992	2.532	26.604	0.08	-0.577962	75.3678	0.803461	965	-2.07346	89.2552	0	0	NA	NA	NA	NA	0	NA	NA	NA	NA	0	1.47159	NA	NA
2021-03-19 01:10:00	OP-100m	UA-150m	MC	451.591	67.995	14.4229	0.81821	0.0627614	5	0.07981	3.956	2.97	1.442	5.907	0.08	-0.577962	75.3678	0.803461	965	-2.07346	89.2552	0	0	NA	NA	NA	NA	0	NA	NA	NA	1.43956e-05	3407175	1.48654	NA	NA
2021-03-19 01:10:00	OP-150m	UA-150m	MC	451.591	67.995	14.4229	0.81821	0.0627614	5	0.07981	3.956	2.97	1.442	5.907	0.08	-0.577962	75.3678	0.803461	965	-2.07346	89.2552	0	0	NA	NA	NA	NA	0	NA	NA	NA	7.61268e-06	801484	1.46509	NA	NA
2021-03-19 01:10:00	OP-200m	UA-150m	MC	451.591	67.995	14.4229	0.81821	0.0627614	5	0.07981	3.956	2.97	1.442	5.907	0.08	-0.577962	75.3678	0.803461	965	-2.07346	89.2552	0	0	NA	NA	NA	NA	0	NA	NA	NA	1.88914e-06	83213	1.4856	NA	NA
2021-03-19 01:10:00	OP-50m	UA-150m	MC	451.591	67.995	14.4229	0.81821	0.0627614	5	0.07981	3.956	2.97	1.442	5.907	0.08	-0.577962	75.3678	0.803461	965	-2.07346	89.2552	0	0	NA	NA	NA	NA	0	NA	NA	NA	2.19592e-05	6870807	1.48159	NA	NA
2021-03-19 01:10:00	OP-UW	UA-150m	MC	451.591	67.995	14.4229	0.81821	0.0627614	5	0.07981	3.956	2.97	1.442	5.907	0.08	-0.577962	75.3678	0.803461	965	-2.07346	89.2552	0	0	NA	NA	NA	NA	0	NA	NA	NA	NA	0	1.47159	NA	NA
2021-03-19 01:20:00	OP-100m	UA-UW	MC	451.591	64.077	8.3367	1.20011	0.0837271	59.9	0.007689	3.041	2.047	1.414	5.655	0.2	-0.505308	72.0487	0.86654	964.913	-2.25	87.8735	0	0	NA	NA	NA	NA	0	NA	NA	NA	1.08683e-05	2598457	1.50485	NA	NA
2021-03-19 01:20:00	OP-150m	UA-UW	MC	451.591	64.077	8.3367	1.20011	0.0837271	59.9	0.007689	3.041	2.047	1.414	5.655	0.2	-0.505308	72.0487	0.86654	964.913	-2.25	87.8735	0	0	NA	NA	NA	NA	0	NA	NA	NA	6.15373e-06	950930	1.47802	NA	NA
2021-03-19 01:20:00	OP-200m	UA-UW	MC	451.591	64.077	8.3367	1.20011	0.0837271	59.9	0.007689	3.041	2.047	1.414	5.655	0.2	-0.505308	72.0487	0.86654	964.913	-2.25	87.8735	0	0	NA	NA	NA	NA	0	NA	NA	NA	1.55928e-06	128252	1.49642	NA	NA
2021-03-19 01:20:00	OP-50m	UA-UW	MC	451.591	64.077	8.3367	1.20011	0.0837271	59.9	0.007689	3.041	2.047	1.414	5.655	0.2	-0.505308	72.0487	0.86654	964.913	-2.25	87.8735	0	0	NA	NA	NA	NA	0	NA	NA	NA	1.45121e-05	4128307	1.50724	NA	NA
2021-03-19 01:20:00	OP-UW	UA-UW	MC	451.591	64.077	8.3367	1.20011	0.0837271	59.9	0.007689	3.041	2.047	1.414	5.655	0.2	-0.505308	72.0487	0.86654	964.913	-2.25	87.8735	0	0	NA	NA	NA	NA	0	NA	NA	NA	NA	0	1.49829	NA	NA
2021-03-19 01:20:00	OP-100m	UA-100m	MC	451.591	78	9.04678	1.01763	0.0767906	8.2	0.03541	2.316	2.011	1.161	3.882	0.08	-0.505308	72.0487	0.86654	964.913	-2.25	87.8735	0	0	NA	NA	NA	NA	0	NA	NA	NA	3.31713e-06	209760	1.50485	NA	NA
2021-03-19 01:20:00	OP-150m	UA-100m	MC	451.591	78	9.04678	1.01763	0.0767906	8.2	0.03541	2.316	2.011	1.161	3.882	0.08	-0.505308	72.0487	0.86654	964.913	-2.25	87.8735	0	0	NA	NA	NA	NA	0	NA	NA	NA	1.12252e-08	58	1.47802	NA	NA
2021-03-19 01:20:00	OP-200m	UA-100m	MC	451.591	78	9.04678	1.01763	0.0767906	8.2	0.03541	2.316	2.011	1.161	3.882	0.08	-0.505308	72.0487	0.86654	964.913	-2.25	87.8735	0	0	NA	NA	NA	NA	0	NA	NA	NA	NA	0	1.49642	NA	NA
2021-03-19 01:20:00	OP-50m	UA-100m	MC	451.591	78	9.04678	1.01763	0.0767906	8.2	0.03541	2.316	2.011	1.161	3.882	0.08	-0.505308	72.0487	0.86654	964.913	-2.25	87.8735	0	0	NA	NA	NA	NA	0	NA	NA	NA	1.89653e-05	4953136	1.50724	NA	NA
2021-03-19 01:20:00	OP-UW	UA-100m	MC	451.591	78	9.04678	1.01763	0.0767906	8.2	0.03541	2.316	2.011	1.161	3.882	0.08	-0.505308	72.0487	0.86654	964.913	-2.25	87.8735	0	0	NA	NA	NA	NA	0	NA	NA	NA	NA	0	1.49829	NA	NA
2021-03-19 01:20:00	OP-100m	UA-150m	MC	451.591	79.93	9.671	1.07051	0.0543898	4.5	0.007497	2.977	2.678	1.5	6.467	0.08	-0.505308	72.0487	0.86654	964.913	-2.25	87.8735	0	0	NA	NA	NA	NA	0	NA	NA	NA	1.40052e-06	64404	1.50485	NA	NA
2021-03-19 01:20:00	OP-150m	UA-150m	MC	451.591	79.93	9.671	1.07051	0.0543898	4.5	0.007497	2.977	2.678	1.5	6.467	0.08	-0.505308	72.0487	0.86654	964.913	-2.25	87.8735	0	0	NA	NA	NA	NA	0	NA	NA	NA	NA	0	1.47802	NA	NA
2021-03-19 01:20:00	OP-200m	UA-150m	MC	451.591	79.93	9.671	1.07051	0.0543898	4.5	0.007497	2.977	2.678	1.5	6.467	0.08	-0.505308	72.0487	0.86654	964.913	-2.25	87.8735	0	0	NA	NA	NA	NA	0	NA	NA	NA	NA	0	1.49642	NA	NA
2021-03-19 01:20:00	OP-50m	UA-150m	MC	451.591	79.93	9.671	1.07051	0.0543898	4.5	0.007497	2.977	2.678	1.5	6.467	0.08	-0.505308	72.0487	0.86654	964.913	-2.25	87.8735	0	0	NA	NA	NA	NA	0	NA	NA	NA	2.1343e-05	4943033	1.50724	NA	NA
2021-03-19 01:20:00	OP-UW	UA-150m	MC	451.591	79.93	9.671	1.07051	0.0543898	4.5	0.007497	2.977	2.678	1.5	6.467	0.08	-0.505308	72.0487	0.86654	964.913	-2.25	87.8735	0	0	NA	NA	NA	NA	0	NA	NA	NA	NA	0	1.49829	NA	NA
2021-03-19 01:30:00	OP-100m	UA-UW	MC	451.591	63.089	8.90577	1.12936	0.0638291	61.4	0.001992	3.009	2.723	1.642	8.058	0.2	-0.56673	69.8729	0.890806	964.9	-2.2	88.5735	0	0	NA	NA	NA	NA	0	NA	NA	NA	1.38157e-05	2639418	1.51553	NA	NA
2021-03-19 01:30:00	OP-150m	UA-UW	MC	451.591	63.089	8.90577	1.12936	0.0638291	61.4	0.001992	3.009	2.723	1.642	8.058	0.2	-0.56673	69.8729	0.890806	964.9	-2.2	88.5735	0	0	NA	NA	NA	NA	0	NA	NA	NA	7.65038e-06	1198404	1.49346	NA	NA
2021-03-19 01:30:00	OP-200m	UA-UW	MC	451.591	63.089	8.90577	1.12936	0.0638291	61.4	0.001992	3.009	2.723	1.642	8.058	0.2	-0.56673	69.8729	0.890806	964.9	-2.2	88.5735	0	0	NA	NA	NA	NA	0	NA	NA	NA	3.65281e-06	285718	1.50748	NA	NA
2021-03-19 01:30:00	OP-50m	UA-UW	MC	451.591	63.089	8.90577	1.12936	0.0638291	61.4	0.001992	3.009	2.723	1.642	8.058	0.2	-0.56673	69.8729	0.890806	964.9	-2.2	88.5735	0	0	NA	NA	NA	NA	0	NA	NA	NA	1.66993e-05	4090856	1.51821	NA	NA
2021-03-19 01:30:00	OP-UW	UA-UW	MC	451.591	63.089	8.90577	1.12936	0.0638291	61.4	0.001992	3.009	2.723	1.642	8.058	0.2	-0.56673	69.8729	0.890806	964.9	-2.2	88.5735	0	0	NA	NA	NA	NA	0	NA	NA	NA	NA	0	1.49513	NA	NA
2021-03-19 01:30:00	OP-100m	UA-100m	MC	451.591	65.946	9.01073	0.889972	0.0610484	6.5	0.02883	2.266	2.215	1.371	5.29	0.08	-0.56673	69.8729	0.890806	964.9	-2.2	88.5735	0	0	NA	NA	NA	NA	0	NA	NA	NA	1.8107e-05	3812211	1.51553	NA	NA
2021-03-19 01:30:00	OP-150m	UA-100m	MC	451.591	65.946	9.01073	0.889972	0.0610484	6.5	0.02883	2.266	2.215	1.371	5.29	0.08	-0.56673	69.8729	0.890806	964.9	-2.2	88.5735	0	0	NA	NA	NA	NA	0	NA	NA	NA	6.59045e-06	887635	1.49346	NA	NA
2021-03-19 01:30:00	OP-200m	UA-100m	MC	451.591	65.946	9.01073	0.889972	0.0610484	6.5	0.02883	2.266	2.215	1.371	5.29	0.08	-0.56673	69.8729	0.890806	964.9	-2.2	88.5735	0	0	NA	NA	NA	NA	0	NA	NA	NA	8.94175e-07	32765	1.50748	NA	NA
2021-03-19 01:30:00	OP-50m	UA-100m	MC	451.591	65.946	9.01073	0.889972	0.0610484	6.5	0.02883	2.266	2.215	1.371	5.29	0.08	-0.56673	69.8729	0.890806	964.9	-2.2	88.5735	0	0	NA	NA	NA	NA	0	NA	NA	NA	2.24908e-05	5919821	1.51821	NA	NA
2021-03-19 01:30:00	OP-UW	UA-100m	MC	451.591	65.946	9.01073	0.889972	0.0610484	6.5	0.02883	2.266	2.215	1.371	5.29	0.08	-0.56673	69.8729	0.890806	964.9	-2.2	88.5735	0	0	NA	NA	NA	NA	0	NA	NA	NA	NA	0	1.49513	NA	NA
2021-03-19 01:30:00	OP-100m	UA-150m	MC	451.591	64.226	8.35425	0.932747	0.0345413	1.6	0.02131	3.672	3.633	2.091	15.393	0.08	-0.56673	69.8729	0.890806	964.9	-2.2	88.5735	0	0	NA	NA	NA	NA	0	NA	NA	NA	2.80083e-05	6333760	1.51553	NA	NA
2021-03-19 01:30:00	OP-150m	UA-150m	MC	451.591	64.226	8.35425	0.932747	0.0345413	1.6	0.02131	3.672	3.633	2.091	15.393	0.08	-0.56673	69.8729	0.890806	964.9	-2.2	88.5735	0	0	NA	NA	NA	NA	0	NA	NA	NA	1.42452e-05	2465861	1.49346	NA	NA
2021-03-19 01:30:00	OP-200m	UA-150m	MC	451.591	64.226	8.35425	0.932747	0.0345413	1.6	0.02131	3.672	3.633	2.091	15.393	0.08	-0.56673	69.8729	0.890806	964.9	-2.2	88.5735	0	0	NA	NA	NA	NA	0	NA	NA	NA	2.56547e-06	131112	1.50748	NA	NA
2021-03-19 01:30:00	OP-50m	UA-150m	MC	451.591	64.226	8.35425	0.932747	0.0345413	1.6	0.02131	3.672	3.633	2.091	15.393	0.08	-0.56673	69.8729	0.890806	964.9	-2.2	88.5735	0	0	NA	NA	NA	NA	0	NA	NA	NA	3.18409e-05	7719518	1.51821	NA	NA
2021-03-19 01:30:00	OP-UW	UA-150m	MC	451.591	64.226	8.35425	0.932747	0.0345413	1.6	0.02131	3.672	3.633	2.091	15.393	0.08	-0.56673	69.8729	0.890806	964.9	-2.2	88.5735	0	0	NA	NA	NA	NA	0	NA	NA	NA	NA	0	1.49513	NA	NA
2021-03-19 01:40:00	OP-100m	UA-UW	MC	451.591	59.901	19.4473	0.622278	0.0677548	79.3	0.05796	2.414	2.102	1.148	3.814	0.2	-0.577962	66.0678	0.782464	964.9	-2.2	88.5867	0	0	NA	NA	NA	NA	0	NA	NA	NA	1.43985e-05	2454366	1.50805	NA	NA
2021-03-19 01:40:00	OP-150m	UA-UW	MC	451.591	59.901	19.4473	0.622278	0.0677548	79.3	0.05796	2.414	2.102	1.148	3.814	0.2	-0.577962	66.0678	0.782464	964.9	-2.2	88.5867	0	0	NA	NA	NA	NA	0	NA	NA	NA	1.06442e-05	1454846	1.48528	NA	NA
2021-03-19 01:40:00	OP-200m	UA-UW	MC	451.591	59.901	19.4473	0.622278	0.0677548	79.3	0.05796	2.414	2.102	1.148	3.814	0.2	-0.577962	66.0678	0.782464	964.9	-2.2	88.5867	0	0	NA	NA	NA	NA	0	NA	NA	NA	7.86335e-06	727536	1.50922	NA	NA
2021-03-19 01:40:00	OP-50m	UA-UW	MC	451.591	59.901	19.4473	0.622278	0.0677548	79.3	0.05796	2.414	2.102	1.148	3.814	0.2	-0.577962	66.0678	0.782464	964.9	-2.2	88.5867	0	0	NA	NA	NA	NA	0	NA	NA	NA	1.9624e-05	4051774	1.50254	NA	NA
2021-03-19 01:40:00	OP-UW	UA-UW	MC	451.591	59.901	19.4473	0.622278	0.0677548	79.3	0.05796	2.414	2.102	1.148	3.814	0.2	-0.577962	66.0678	0.782464	964.9	-2.2	88.5867	0	0	NA	NA	NA	NA	0	NA	NA	NA	NA	0	1.50873	NA	NA
2021-03-19 01:40:00	OP-100m	UA-100m	MC	451.591	68.166	24.2563	0.597255	0.0359064	5	0.02042	2.931	2.673	1.433	5.825	0.08	-0.577962	66.0678	0.782464	964.9	-2.2	88.5867	0	0	NA	NA	NA	NA	0	NA	NA	NA	2.66628e-05	3275137	1.50805	NA	NA
2021-03-19 01:40:00	OP-150m	UA-100m	MC	451.591	68.166	24.2563	0.597255	0.0359064	5	0.02042	2.931	2.673	1.433	5.825	0.08	-0.577962	66.0678	0.782464	964.9	-2.2	88.5867	0	0	NA	NA	NA	NA	0	NA	NA	NA	8.51166e-06	491000	1.48528	NA	NA
2021-03-19 01:40:00	OP-200m	UA-100m	MC	451.591	68.166	24.2563	0.597255	0.0359064	5	0.02042	2.931	2.673	1.433	5.825	0.08	-0.577962	66.0678	0.782464	964.9	-2.2	88.5867	0	0	NA	NA	NA	NA	0	NA	NA	NA	1.28667e-06	19465	1.50922	NA	NA
2021-03-19 01:40:00	OP-50m	UA-100m	MC	451.591	68.166	24.2563	0.597255	0.0359064	5	0.02042	2.931	2.673	1.433	5.825	0.08	-0.577962	66.0678	0.782464	964.9	-2.2	88.5867	0	0	NA	NA	NA	NA	0	NA	NA	NA	4.37205e-05	6053174	1.50254	NA	NA
2021-03-19 01:40:00	OP-UW	UA-100m	MC	451.591	68.166	24.2563	0.597255	0.0359064	5	0.02042	2.931	2.673	1.433	5.825	0.08	-0.577962	66.0678	0.782464	964.9	-2.2	88.5867	0	0	NA	NA	NA	NA	0	NA	NA	NA	NA	0	1.50873	NA	NA
2021-03-19 01:40:00	OP-100m	UA-150m	MC	451.591	69.909	50.361	0.485617	0.0407063	6.2	0.08592	3.097	2.577	1.238	4.328	0.08	-0.577962	66.0678	0.782464	964.9	-2.2	88.5867	0	0	NA	NA	NA	NA	0	NA	NA	NA	2.03981e-05	2558375	1.50805	NA	NA
2021-03-19 01:40:00	OP-150m	UA-150m	MC	451.591	69.909	50.361	0.485617	0.0407063	6.2	0.08592	3.097	2.577	1.238	4.328	0.08	-0.577962	66.0678	0.782464	964.9	-2.2	88.5867	0	0	NA	NA	NA	NA	0	NA	NA	NA	6.78976e-06	365197	1.48528	NA	NA
2021-03-19 01:40:00	OP-200m	UA-150m	MC	451.591	69.909	50.361	0.485617	0.0407063	6.2	0.08592	3.097	2.577	1.238	4.328	0.08	-0.577962	66.0678	0.782464	964.9	-2.2	88.5867	0	0	NA	NA	NA	NA	0	NA	NA	NA	1.45629e-06	20181	1.50922	NA	NA
2021-03-19 01:40:00	OP-50m	UA-150m	MC	451.591	69.909	50.361	0.485617	0.0407063	6.2	0.08592	3.097	2.577	1.238	4.328	0.08	-0.577962	66.0678	0.782464	964.9	-2.2	88.5867	0	0	NA	NA	NA	NA	0	NA	NA	NA	3.8298e-05	6204558	1.50254	NA	NA
2021-03-19 01:40:00	OP-UW	UA-150m	MC	451.591	69.909	50.361	0.485617	0.0407063	6.2	0.08592	3.097	2.577	1.238	4.328	0.08	-0.577962	66.0678	0.782464	964.9	-2.2	88.5867	0	0	NA	NA	NA	NA	0	NA	NA	NA	NA	0	1.50873	NA	NA
2021-03-19 02:00:00	OP-100m	UA-UW	MC	451.591	109.887	26.3315	0.884566	0.0533992	9.5	0.00742	2.373	2.415	1.397	5.508	0.2	-0.6	87.5364	0.248768	964.8	-2.07654	89.5938	0	0	NA	NA	NA	NA	0	NA	NA	NA	NA	0	1.50431	NA	NA
2021-03-19 02:00:00	OP-150m	UA-UW	MC	451.591	109.887	26.3315	0.884566	0.0533992	9.5	0.00742	2.373	2.415	1.397	5.508	0.2	-0.6	87.5364	0.248768	964.8	-2.07654	89.5938	0	0	NA	NA	NA	NA	0	NA	NA	NA	NA	0	1.47828	NA	NA
2021-03-19 02:00:00	OP-200m	UA-UW	MC	451.591	109.887	26.3315	0.884566	0.0533992	9.5	0.00742	2.373	2.415	1.397	5.508	0.2	-0.6	87.5364	0.248768	964.8	-2.07654	89.5938	0	0	NA	NA	NA	NA	0	NA	NA	NA	NA	0	1.49256	NA	NA
2021-03-19 02:00:00	OP-50m	UA-UW	MC	451.591	109.887	26.3315	0.884566	0.0533992	9.5	0.00742	2.373	2.415	1.397	5.508	0.2	-0.6	87.5364	0.248768	964.8	-2.07654	89.5938	0	0	NA	NA	NA	NA	0	NA	NA	NA	1.33317e-09	3	1.50317	NA	NA
2021-03-19 02:00:00	OP-UW	UA-UW	MC	451.591	109.887	26.3315	0.884566	0.0533992	9.5	0.00742	2.373	2.415	1.397	5.508	0.2	-0.6	87.5364	0.248768	964.8	-2.07654	89.5938	0	0	NA	NA	NA	NA	0	NA	NA	NA	NA	0	1.50799	NA	NA
2021-03-19 02:00:00	OP-100m	UA-100m	MC	451.591	83.111	44.6817	0.589482	0.0133946	0.8	0.02307	3.59	6.347	2.087	15.311	0.08	-0.6	87.5364	0.248768	964.8	-2.07654	89.5938	0	0	NA	NA	NA	NA	0	NA	NA	NA	7.16195e-06	105974	1.50431	NA	NA
2021-03-19 02:00:00	OP-150m	UA-100m	MC	451.591	83.111	44.6817	0.589482	0.0133946	0.8	0.02307	3.59	6.347	2.087	15.311	0.08	-0.6	87.5364	0.248768	964.8	-2.07654	89.5938	0	0	NA	NA	NA	NA	0	NA	NA	NA	1.10947e-07	196	1.47828	NA	NA
2021-03-19 02:00:00	OP-200m	UA-100m	MC	451.591	83.111	44.6817	0.589482	0.0133946	0.8	0.02307	3.59	6.347	2.087	15.311	0.08	-0.6	87.5364	0.248768	964.8	-2.07654	89.5938	0	0	NA	NA	NA	NA	0	NA	NA	NA	NA	0	1.49256	NA	NA
2021-03-19 02:00:00	OP-50m	UA-100m	MC	451.591	83.111	44.6817	0.589482	0.0133946	0.8	0.02307	3.59	6.347	2.087	15.311	0.08	-0.6	87.5364	0.248768	964.8	-2.07654	89.5938	0	0	NA	NA	NA	NA	0	NA	NA	NA	5.42895e-05	3514090	1.50317	NA	NA
2021-03-19 02:00:00	OP-UW	UA-100m	MC	451.591	83.111	44.6817	0.589482	0.0133946	0.8	0.02307	3.59	6.347	2.087	15.311	0.08	-0.6	87.5364	0.248768	964.8	-2.07654	89.5938	0	0	NA	NA	NA	NA	0	NA	NA	NA	NA	0	1.50799	NA	NA
2021-03-19 02:00:00	OP-100m	UA-150m	MC	451.591	79.755	34.9856	0.644511	0.0223153	6.1	9.707e-05	3.448	3.412	1.556	7.056	0.08	-0.6	87.5364	0.248768	964.8	-2.07654	89.5938	0	0	NA	NA	NA	NA	0	NA	NA	NA	4.57766e-06	87262	1.50431	NA	NA
2021-03-19 02:00:00	OP-150m	UA-150m	MC	451.591	79.755	34.9856	0.644511	0.0223153	6.1	9.707e-05	3.448	3.412	1.556	7.056	0.08	-0.6	87.5364	0.248768	964.8	-2.07654	89.5938	0	0	NA	NA	NA	NA	0	NA	NA	NA	NA	0	1.47828	NA	NA
2021-03-19 02:00:00	OP-200m	UA-150m	MC	451.591	79.755	34.9856	0.644511	0.0223153	6.1	9.707e-05	3.448	3.412	1.556	7.056	0.08	-0.6	87.5364	0.248768	964.8	-2.07654	89.5938	0	0	NA	NA	NA	NA	0	NA	NA	NA	NA	0	1.49256	NA	NA
2021-03-19 02:00:00	OP-50m	UA-150m	MC	451.591	79.755	34.9856	0.644511	0.0223153	6.1	9.707e-05	3.448	3.412	1.556	7.056	0.08	-0.6	87.5364	0.248768	964.8	-2.07654	89.5938	0	0	NA	NA	NA	NA	0	NA	NA	NA	4.84338e-05	3352821	1.50317	NA	NA
2021-03-19 02:00:00	OP-UW	UA-150m	MC	451.591	79.755	34.9856	0.644511	0.0223153	6.1	9.707e-05	3.448	3.412	1.556	7.056	0.08	-0.6	87.5364	0.248768	964.8	-2.07654	89.5938	0	0	NA	NA	NA	NA	0	NA	NA	NA	NA	0	1.50799	NA	NA
2021-03-19 02:10:00	OP-100m	UA-UW	MC	451.591	100.992	6.43175	1.30146	0.0453255	8.6	5.638e-05	2.927	2.439	1.554	7.034	0.2	-0.696114	92.6488	1.01773	964.713	-2	91.2479	0	0	NA	NA	NA	NA	0	NA	NA	NA	NA	0	1.49973	NA	NA
2021-03-19 02:10:00	OP-150m	UA-UW	MC	451.591	100.992	6.43175	1.30146	0.0453255	8.6	5.638e-05	2.927	2.439	1.554	7.034	0.2	-0.696114	92.6488	1.01773	964.713	-2	91.2479	0	0	NA	NA	NA	NA	0	NA	NA	NA	NA	0	1.46603	NA	NA
2021-03-19 02:10:00	OP-200m	UA-UW	MC	451.591	100.992	6.43175	1.30146	0.0453255	8.6	5.638e-05	2.927	2.439	1.554	7.034	0.2	-0.696114	92.6488	1.01773	964.713	-2	91.2479	0	0	NA	NA	NA	NA	0	NA	NA	NA	NA	0	1.46767	NA	NA
2021-03-19 02:10:00	OP-50m	UA-UW	MC	451.591	100.992	6.43175	1.30146	0.0453255	8.6	5.638e-05	2.927	2.439	1.554	7.034	0.2	-0.696114	92.6488	1.01773	964.713	-2	91.2479	0	0	NA	NA	NA	NA	0	NA	NA	NA	2.26458e-08	63	1.50546	NA	NA
2021-03-19 02:10:00	OP-UW	UA-UW	MC	451.591	100.992	6.43175	1.30146	0.0453255	8.6	5.638e-05	2.927	2.439	1.554	7.034	0.2	-0.696114	92.6488	1.01773	964.713	-2	91.2479	0	0	NA	NA	NA	NA	0	NA	NA	NA	NA	0	1.50486	NA	NA
2021-03-19 02:10:00	OP-100m	UA-100m	MC	451.591	90.156	5.34663	1.13812	0.0532762	12.6	0.0009235	2.442	1.674	1.187	4.024	0.08	-0.696114	92.6488	1.01773	964.713	-2	91.2479	0	0	NA	NA	NA	NA	0	NA	NA	NA	NA	0	1.49973	NA	NA
2021-03-19 02:10:00	OP-150m	UA-100m	MC	451.591	90.156	5.34663	1.13812	0.0532762	12.6	0.0009235	2.442	1.674	1.187	4.024	0.08	-0.696114	92.6488	1.01773	964.713	-2	91.2479	0	0	NA	NA	NA	NA	0	NA	NA	NA	NA	0	1.46603	NA	NA
2021-03-19 02:10:00	OP-200m	UA-100m	MC	451.591	90.156	5.34663	1.13812	0.0532762	12.6	0.0009235	2.442	1.674	1.187	4.024	0.08	-0.696114	92.6488	1.01773	964.713	-2	91.2479	0	0	NA	NA	NA	NA	0	NA	NA	NA	NA	0	1.46767	NA	NA
2021-03-19 02:10:00	OP-50m	UA-100m	MC	451.591	90.156	5.34663	1.13812	0.0532762	12.6	0.0009235	2.442	1.674	1.187	4.024	0.08	-0.696114	92.6488	1.01773	964.713	-2	91.2479	0	0	NA	NA	NA	NA	0	NA	NA	NA	8.8864e-06	825984	1.50546	NA	NA
2021-03-19 02:10:00	OP-UW	UA-100m	MC	451.591	90.156	5.34663	1.13812	0.0532762	12.6	0.0009235	2.442	1.674	1.187	4.024	0.08	-0.696114	92.6488	1.01773	964.713	-2	91.2479	0	0	NA	NA	NA	NA	0	NA	NA	NA	NA	0	1.50486	NA	NA
2021-03-19 02:10:00	OP-100m	UA-150m	MC	451.591	92.124	6.60947	1.1386	0.0399621	3.5	0.0004112	3.162	2.375	1.575	7.267	0.08	-0.696114	92.6488	1.01773	964.713	-2	91.2479	0	0	NA	NA	NA	NA	0	NA	NA	NA	NA	0	1.49973	NA	NA
2021-03-19 02:10:00	OP-150m	UA-150m	MC	451.591	92.124	6.60947	1.1386	0.0399621	3.5	0.0004112	3.162	2.375	1.575	7.267	0.08	-0.696114	92.6488	1.01773	964.713	-2	91.2479	0	0	NA	NA	NA	NA	0	NA	NA	NA	NA	0	1.46603	NA	NA
2021-03-19 02:10:00	OP-200m	UA-150m	MC	451.591	92.124	6.60947	1.1386	0.0399621	3.5	0.0004112	3.162	2.375	1.575	7.267	0.08	-0.696114	92.6488	1.01773	964.713	-2	91.2479	0	0	NA	NA	NA	NA	0	NA	NA	NA	NA	0	1.46767	NA	NA
2021-03-19 02:10:00	OP-50m	UA-150m	MC	451.591	92.124	6.60947	1.1386	0.0399621	3.5	0.0004112	3.162	2.375	1.575	7.267	0.08	-0.696114	92.6488	1.01773	964.713	-2	91.2479	0	0	NA	NA	NA	NA	0	NA	NA	NA	5.52132e-06	486871	1.50546	NA	NA
2021-03-19 02:10:00	OP-UW	UA-150m	MC	451.591	92.124	6.60947	1.1386	0.0399621	3.5	0.0004112	3.162	2.375	1.575	7.267	0.08	-0.696114	92.6488	1.01773	964.713	-2	91.2479	0	0	NA	NA	NA	NA	0	NA	NA	NA	NA	0	1.50486	NA	NA
2021-03-19 02:20:00	OP-100m	UA-UW	MC	451.591	77.904	20.5109	0.475417	0.0338371	-20.9	0.005594	3.251	2.815	1.742	7.554	0.2	-0.782654	77.1438	0.688199	964.613	-1.87654	92.4704	0	0	NA	NA	NA	NA	0	NA	NA	NA	1.03889e-05	244268	1.4704	NA	NA
2021-03-19 02:20:00	OP-150m	UA-UW	MC	451.591	77.904	20.5109	0.475417	0.0338371	-20.9	0.005594	3.251	2.815	1.742	7.554	0.2	-0.782654	77.1438	0.688199	964.613	-1.87654	92.4704	0	0	NA	NA	NA	NA	0	NA	NA	NA	7.1588e-07	7409	1.44663	NA	NA
2021-03-19 02:20:00	OP-200m	UA-UW	MC	451.591	77.904	20.5109	0.475417	0.0338371	-20.9	0.005594	3.251	2.815	1.742	7.554	0.2	-0.782654	77.1438	0.688199	964.613	-1.87654	92.4704	0	0	NA	NA	NA	NA	0	NA	NA	NA	1.7336e-07	353	1.45351	NA	NA
2021-03-19 02:20:00	OP-50m	UA-UW	MC	451.591	77.904	20.5109	0.475417	0.0338371	-20.9	0.005594	3.251	2.815	1.742	7.554	0.2	-0.782654	77.1438	0.688199	964.613	-1.87654	92.4704	0	0	NA	NA	NA	NA	0	NA	NA	NA	2.50613e-05	2795823	1.46578	NA	NA
2021-03-19 02:20:00	OP-UW	UA-UW	MC	451.591	77.904	20.5109	0.475417	0.0338371	-20.9	0.005594	3.251	2.815	1.742	7.554	0.2	-0.782654	77.1438	0.688199	964.613	-1.87654	92.4704	0	0	NA	NA	NA	NA	0	NA	NA	NA	NA	0	1.48698	NA	NA
2021-03-19 02:20:00	OP-100m	UA-100m	MC	451.591	56.713	33.8454	0.487074	0.0313262	1.9	0.3322	2.965	2.8	1.603	7.589	0.08	-0.782654	77.1438	0.688199	964.613	-1.87654	92.4704	0	0	NA	NA	NA	NA	0	NA	NA	NA	3.97356e-05	7069301	1.4704	NA	NA
2021-03-19 02:20:00	OP-150m	UA-100m	MC	451.591	56.713	33.8454	0.487074	0.0313262	1.9	0.3322	2.965	2.8	1.603	7.589	0.08	-0.782654	77.1438	0.688199	964.613	-1.87654	92.4704	0	0	NA	NA	NA	NA	0	NA	NA	NA	3.53771e-05	5607847	1.44663	NA	NA
2021-03-19 02:20:00	OP-200m	UA-100m	MC	451.591	56.713	33.8454	0.487074	0.0313262	1.9	0.3322	2.965	2.8	1.603	7.589	0.08	-0.782654	77.1438	0.688199	964.613	-1.87654	92.4704	0	0	NA	NA	NA	NA	0	NA	NA	NA	2.91118e-05	4039596	1.45351	NA	NA
2021-03-19 02:20:00	OP-50m	UA-100m	MC	451.591	56.713	33.8454	0.487074	0.0313262	1.9	0.3322	2.965	2.8	1.603	7.589	0.08	-0.782654	77.1438	0.688199	964.613	-1.87654	92.4704	0	0	NA	NA	NA	NA	0	NA	NA	NA	4.9692e-05	9761482	1.46578	NA	NA
2021-03-19 02:20:00	OP-UW	UA-100m	MC	451.591	56.713	33.8454	0.487074	0.0313262	1.9	0.3322	2.965	2.8	1.603	7.589	0.08	-0.782654	77.1438	0.688199	964.613	-1.87654	92.4704	0	0	NA	NA	NA	NA	0	NA	NA	NA	NA	0	1.48698	NA	NA
2021-03-19 02:20:00	OP-100m	UA-150m	MC	451.591	49.177	29.9043	0.455995	0.0160478	0.6	0.727	4.009	4.741	2.283	19.74	0.08	-0.782654	77.1438	0.688199	964.613	-1.87654	92.4704	0	0	NA	NA	NA	NA	0	NA	NA	NA	7.61308e-05	11240977	1.4704	NA	NA
2021-03-19 02:20:00	OP-150m	UA-150m	MC	451.591	49.177	29.9043	0.455995	0.0160478	0.6	0.727	4.009	4.741	2.283	19.74	0.08	-0.782654	77.1438	0.688199	964.613	-1.87654	92.4704	0	0	NA	NA	NA	NA	0	NA	NA	NA	6.83642e-05	9084551	1.44663	NA	NA
2021-03-19 02:20:00	OP-200m	UA-150m	MC	451.591	49.177	29.9043	0.455995	0.0160478	0.6	0.727	4.009	4.741	2.283	19.74	0.08	-0.782654	77.1438	0.688199	964.613	-1.87654	92.4704	0	0	NA	NA	NA	NA	0	NA	NA	NA	6.5013e-05	7740172	1.45351	NA	NA
2021-03-19 02:20:00	OP-50m	UA-150m	MC	451.591	49.177	29.9043	0.455995	0.0160478	0.6	0.727	4.009	4.741	2.283	19.74	0.08	-0.782654	77.1438	0.688199	964.613	-1.87654	92.4704	0	0	NA	NA	NA	NA	0	NA	NA	NA	8.7879e-05	15016776	1.46578	NA	NA
2021-03-19 02:20:00	OP-UW	UA-150m	MC	451.591	49.177	29.9043	0.455995	0.0160478	0.6	0.727	4.009	4.741	2.283	19.74	0.08	-0.782654	77.1438	0.688199	964.613	-1.87654	92.4704	0	0	NA	NA	NA	NA	0	NA	NA	NA	NA	0	1.48698	NA	NA
2021-03-19 02:30:00	OP-100m	UA-UW	MC	451.591	9.002	29.6644	0.49594	0.0335361	24.2	0.008151	2.584	3.62	1.693	8.709	0.2	-0.707962	5.80305	0.422038	964.6	-1.83673	91.796	0	0	NA	NA	NA	NA	0	NA	NA	NA	5.61188e-06	254364	1.47391	NA	NA
2021-03-19 02:30:00	OP-150m	UA-UW	MC	451.591	9.002	29.6644	0.49594	0.0335361	24.2	0.008151	2.584	3.62	1.693	8.709	0.2	-0.707962	5.80305	0.422038	964.6	-1.83673	91.796	0	0	NA	NA	NA	NA	0	NA	NA	NA	9.65513e-07	11138	1.45141	NA	NA
2021-03-19 02:30:00	OP-200m	UA-UW	MC	451.591	9.002	29.6644	0.49594	0.0335361	24.2	0.008151	2.584	3.62	1.693	8.709	0.2	-0.707962	5.80305	0.422038	964.6	-1.83673	91.796	0	0	NA	NA	NA	NA	0	NA	NA	NA	2.25813e-07	666	1.47123	NA	NA
2021-03-19 02:30:00	OP-50m	UA-UW	MC	451.591	9.002	29.6644	0.49594	0.0335361	24.2	0.008151	2.584	3.62	1.693	8.709	0.2	-0.707962	5.80305	0.422038	964.6	-1.83673	91.796	0	0	NA	NA	NA	NA	0	NA	NA	NA	2.52573e-05	3486244	1.4771	NA	NA
2021-03-19 02:30:00	OP-UW	UA-UW	MC	451.591	9.002	29.6644	0.49594	0.0335361	24.2	0.008151	2.584	3.62	1.693	8.709	0.2	-0.707962	5.80305	0.422038	964.6	-1.83673	91.796	0	0	NA	NA	NA	NA	0	NA	NA	NA	NA	0	1.47473	NA	NA
2021-03-19 02:40:00	OP-100m	UA-UW	MC	451.591	353.14	20.613	0.71955	0.0178954	-0.8	5.638e-05	12.364	15.205	3.601	9.603	0.2	-0.778768	349.884	0.598768	964.563	-1.98673	91.7938	0	0	NA	NA	NA	NA	0	NA	NA	NA	9.39727e-06	107332	1.49727	NA	NA
2021-03-19 02:40:00	OP-150m	UA-UW	MC	451.591	353.14	20.613	0.71955	0.0178954	-0.8	5.638e-05	12.364	15.205	3.601	9.603	0.2	-0.778768	349.884	0.598768	964.563	-1.98673	91.7938	0	0	NA	NA	NA	NA	0	NA	NA	NA	7.22611e-06	41785	1.47094	NA	NA
2021-03-19 02:40:00	OP-200m	UA-UW	MC	451.591	353.14	20.613	0.71955	0.0178954	-0.8	5.638e-05	12.364	15.205	3.601	9.603	0.2	-0.778768	349.884	0.598768	964.563	-1.98673	91.7938	0	0	NA	NA	NA	NA	0	NA	NA	NA	4.25573e-06	21091	1.486	NA	NA
2021-03-19 02:40:00	OP-50m	UA-UW	MC	451.591	353.14	20.613	0.71955	0.0178954	-0.8	5.638e-05	12.364	15.205	3.601	9.603	0.2	-0.778768	349.884	0.598768	964.563	-1.98673	91.7938	0	0	NA	NA	NA	NA	0	NA	NA	NA	2.02995e-05	413847	1.49596	NA	NA
2021-03-19 02:40:00	OP-UW	UA-UW	MC	451.591	353.14	20.613	0.71955	0.0178954	-0.8	5.638e-05	12.364	15.205	3.601	9.603	0.2	-0.778768	349.884	0.598768	964.563	-1.98673	91.7938	0	0	NA	NA	NA	NA	0	NA	NA	NA	4.38851e-07	577	1.47972	NA	NA
2021-03-19 02:40:00	OP-100m	UA-100m	MC	451.591	355.913	16.2041	0.707614	0.0309998	3.6	0.003795	5.305	4.354	1.515	6.62	0.08	-0.778768	349.884	0.598768	964.563	-1.98673	91.7938	0	0	NA	NA	NA	NA	0	NA	NA	NA	8.44951e-07	2947	1.49727	NA	NA
2021-03-19 02:40:00	OP-150m	UA-100m	MC	451.591	355.913	16.2041	0.707614	0.0309998	3.6	0.003795	5.305	4.354	1.515	6.62	0.08	-0.778768	349.884	0.598768	964.563	-1.98673	91.7938	0	0	NA	NA	NA	NA	0	NA	NA	NA	NA	0	1.47094	NA	NA
2021-03-19 02:40:00	OP-200m	UA-100m	MC	451.591	355.913	16.2041	0.707614	0.0309998	3.6	0.003795	5.305	4.354	1.515	6.62	0.08	-0.778768	349.884	0.598768	964.563	-1.98673	91.7938	0	0	NA	NA	NA	NA	0	NA	NA	NA	NA	0	1.486	NA	NA
2021-03-19 02:40:00	OP-50m	UA-100m	MC	451.591	355.913	16.2041	0.707614	0.0309998	3.6	0.003795	5.305	4.354	1.515	6.62	0.08	-0.778768	349.884	0.598768	964.563	-1.98673	91.7938	0	0	NA	NA	NA	NA	0	NA	NA	NA	1.49323e-05	972154	1.49596	NA	NA
2021-03-19 02:40:00	OP-UW	UA-100m	MC	451.591	355.913	16.2041	0.707614	0.0309998	3.6	0.003795	5.305	4.354	1.515	6.62	0.08	-0.778768	349.884	0.598768	964.563	-1.98673	91.7938	0	0	NA	NA	NA	NA	0	NA	NA	NA	NA	0	1.47972	NA	NA
2021-03-19 02:40:00	OP-100m	UA-150m	MC	451.591	358.271	15.5671	0.803281	0.0257618	1.9	0.001742	5.342	6.008	1.593	7.472	0.08	-0.778768	349.884	0.598768	964.563	-1.98673	91.7938	0	0	NA	NA	NA	NA	0	NA	NA	NA	2.43868e-06	29184	1.49727	NA	NA
2021-03-19 02:40:00	OP-150m	UA-150m	MC	451.591	358.271	15.5671	0.803281	0.0257618	1.9	0.001742	5.342	6.008	1.593	7.472	0.08	-0.778768	349.884	0.598768	964.563	-1.98673	91.7938	0	0	NA	NA	NA	NA	0	NA	NA	NA	6.93225e-08	88	1.47094	NA	NA
2021-03-19 02:40:00	OP-200m	UA-150m	MC	451.591	358.271	15.5671	0.803281	0.0257618	1.9	0.001742	5.342	6.008	1.593	7.472	0.08	-0.778768	349.884	0.598768	964.563	-1.98673	91.7938	0	0	NA	NA	NA	NA	0	NA	NA	NA	NA	0	1.486	NA	NA
2021-03-19 02:40:00	OP-50m	UA-150m	MC	451.591	358.271	15.5671	0.803281	0.0257618	1.9	0.001742	5.342	6.008	1.593	7.472	0.08	-0.778768	349.884	0.598768	964.563	-1.98673	91.7938	0	0	NA	NA	NA	NA	0	NA	NA	NA	2.24141e-05	1385918	1.49596	NA	NA
2021-03-19 02:40:00	OP-UW	UA-150m	MC	451.591	358.271	15.5671	0.803281	0.0257618	1.9	0.001742	5.342	6.008	1.593	7.472	0.08	-0.778768	349.884	0.598768	964.563	-1.98673	91.7938	0	0	NA	NA	NA	NA	0	NA	NA	NA	NA	0	1.47972	NA	NA
2021-03-19 02:50:00	OP-100m	UA-UW	MC	451.591	11.767	24.188	0.790753	0.0413652	-66.2	0.000888	2.567	3.468	1.652	7.6	0.2	-0.902038	1.36158	0.692038	964.463	-2	92.4469	0	0	NA	NA	NA	NA	0	NA	NA	NA	5.32026e-06	256047	1.51239	NA	NA
2021-03-19 02:50:00	OP-150m	UA-UW	MC	451.591	11.767	24.188	0.790753	0.0413652	-66.2	0.000888	2.567	3.468	1.652	7.6	0.2	-0.902038	1.36158	0.692038	964.463	-2	92.4469	0	0	NA	NA	NA	NA	0	NA	NA	NA	8.72628e-07	11162	1.49483	NA	NA
2021-03-19 02:50:00	OP-200m	UA-UW	MC	451.591	11.767	24.188	0.790753	0.0413652	-66.2	0.000888	2.567	3.468	1.652	7.6	0.2	-0.902038	1.36158	0.692038	964.463	-2	92.4469	0	0	NA	NA	NA	NA	0	NA	NA	NA	6.38791e-07	1349	1.51532	NA	NA
2021-03-19 02:50:00	OP-50m	UA-UW	MC	451.591	11.767	24.188	0.790753	0.0413652	-66.2	0.000888	2.567	3.468	1.652	7.6	0.2	-0.902038	1.36158	0.692038	964.463	-2	92.4469	0	0	NA	NA	NA	NA	0	NA	NA	NA	2.16661e-05	3012906	1.5217	NA	NA
2021-03-19 02:50:00	OP-UW	UA-UW	MC	451.591	11.767	24.188	0.790753	0.0413652	-66.2	0.000888	2.567	3.468	1.652	7.6	0.2	-0.902038	1.36158	0.692038	964.463	-2	92.4469	0	0	NA	NA	NA	NA	0	NA	NA	NA	NA	0	1.52805	NA	NA
2021-03-19 02:50:00	OP-100m	UA-100m	MC	451.591	7.098	21.8398	0.765524	0.0460208	5.4	0.01754	2.757	2.695	1.351	5.13	0.08	-0.902038	1.36158	0.692038	964.463	-2	92.4469	0	0	NA	NA	NA	NA	0	NA	NA	NA	7.21472e-07	13090	1.51239	NA	NA
2021-03-19 02:50:00	OP-150m	UA-100m	MC	451.591	7.098	21.8398	0.765524	0.0460208	5.4	0.01754	2.757	2.695	1.351	5.13	0.08	-0.902038	1.36158	0.692038	964.463	-2	92.4469	0	0	NA	NA	NA	NA	0	NA	NA	NA	NA	0	1.49483	NA	NA
2021-03-19 02:50:00	OP-200m	UA-100m	MC	451.591	7.098	21.8398	0.765524	0.0460208	5.4	0.01754	2.757	2.695	1.351	5.13	0.08	-0.902038	1.36158	0.692038	964.463	-2	92.4469	0	0	NA	NA	NA	NA	0	NA	NA	NA	NA	0	1.51532	NA	NA
2021-03-19 02:50:00	OP-50m	UA-100m	MC	451.591	7.098	21.8398	0.765524	0.0460208	5.4	0.01754	2.757	2.695	1.351	5.13	0.08	-0.902038	1.36158	0.692038	964.463	-2	92.4469	0	0	NA	NA	NA	NA	0	NA	NA	NA	2.22628e-05	3979097	1.5217	NA	NA
2021-03-19 02:50:00	OP-UW	UA-100m	MC	451.591	7.098	21.8398	0.765524	0.0460208	5.4	0.01754	2.757	2.695	1.351	5.13	0.08	-0.902038	1.36158	0.692038	964.463	-2	92.4469	0	0	NA	NA	NA	NA	0	NA	NA	NA	NA	0	1.52805	NA	NA
2021-03-19 02:50:00	OP-100m	UA-150m	MC	451.591	9.425	20.7318	0.820749	0.0268514	1.4	0.01476	4.512	4.811	1.931	12.349	0.08	-0.902038	1.36158	0.692038	964.463	-2	92.4469	0	0	NA	NA	NA	NA	0	NA	NA	NA	3.78045e-06	133547	1.51239	NA	NA
2021-03-19 02:50:00	OP-150m	UA-150m	MC	451.591	9.425	20.7318	0.820749	0.0268514	1.4	0.01476	4.512	4.811	1.931	12.349	0.08	-0.902038	1.36158	0.692038	964.463	-2	92.4469	0	0	NA	NA	NA	NA	0	NA	NA	NA	2.00458e-08	50	1.49483	NA	NA
2021-03-19 02:50:00	OP-200m	UA-150m	MC	451.591	9.425	20.7318	0.820749	0.0268514	1.4	0.01476	4.512	4.811	1.931	12.349	0.08	-0.902038	1.36158	0.692038	964.463	-2	92.4469	0	0	NA	NA	NA	NA	0	NA	NA	NA	NA	0	1.51532	NA	NA
2021-03-19 02:50:00	OP-50m	UA-150m	MC	451.591	9.425	20.7318	0.820749	0.0268514	1.4	0.01476	4.512	4.811	1.931	12.349	0.08	-0.902038	1.36158	0.692038	964.463	-2	92.4469	0	0	NA	NA	NA	NA	0	NA	NA	NA	3.67937e-05	5473361	1.5217	NA	NA
2021-03-19 02:50:00	OP-UW	UA-150m	MC	451.591	9.425	20.7318	0.820749	0.0268514	1.4	0.01476	4.512	4.811	1.931	12.349	0.08	-0.902038	1.36158	0.692038	964.463	-2	92.4469	0	0	NA	NA	NA	NA	0	NA	NA	NA	NA	0	1.52805	NA	NA
2021-03-19 03:00:00	OP-100m	UA-UW	MC	451.591	40.961	9.59201	0.912717	0.0628365	11.3	0.0143	2.416	2.286	1.497	6.436	0.2	-0.902654	32.295	0.601233	964.4	-1.91327	92.7133	0	0	NA	NA	NA	NA	0	NA	NA	NA	1.78154e-05	3759436	1.54545	NA	NA
2021-03-19 03:00:00	OP-150m	UA-UW	MC	451.591	40.961	9.59201	0.912717	0.0628365	11.3	0.0143	2.416	2.286	1.497	6.436	0.2	-0.902654	32.295	0.601233	964.4	-1.91327	92.7133	0	0	NA	NA	NA	NA	0	NA	NA	NA	1.67405e-05	2996943	1.51664	NA	NA
2021-03-19 03:00:00	OP-200m	UA-UW	MC	451.591	40.961	9.59201	0.912717	0.0628365	11.3	0.0143	2.416	2.286	1.497	6.436	0.2	-0.902654	32.295	0.601233	964.4	-1.91327	92.7133	0	0	NA	NA	NA	NA	0	NA	NA	NA	1.31457e-05	2533162	1.53753	NA	NA
2021-03-19 03:00:00	OP-50m	UA-UW	MC	451.591	40.961	9.59201	0.912717	0.0628365	11.3	0.0143	2.416	2.286	1.497	6.436	0.2	-0.902654	32.295	0.601233	964.4	-1.91327	92.7133	0	0	NA	NA	NA	NA	0	NA	NA	NA	2.13627e-05	5221539	1.54041	NA	NA
2021-03-19 03:00:00	OP-UW	UA-UW	MC	451.591	40.961	9.59201	0.912717	0.0628365	11.3	0.0143	2.416	2.286	1.497	6.436	0.2	-0.902654	32.295	0.601233	964.4	-1.91327	92.7133	0	0	NA	NA	NA	NA	0	NA	NA	NA	NA	0	1.51591	NA	NA
2021-03-19 03:00:00	OP-100m	UA-100m	MC	451.591	40.787	21.5384	0.565942	0.0385214	1.6	0.599	4.363	3.054	1.752	9.518	0.08	-0.902654	32.295	0.601233	964.4	-1.91327	92.7133	0	0	NA	NA	NA	NA	0	NA	NA	NA	3.1628e-05	7955905	1.54545	NA	NA
2021-03-19 03:00:00	OP-150m	UA-100m	MC	451.591	40.787	21.5384	0.565942	0.0385214	1.6	0.599	4.363	3.054	1.752	9.518	0.08	-0.902654	32.295	0.601233	964.4	-1.91327	92.7133	0	0	NA	NA	NA	NA	0	NA	NA	NA	3.07993e-05	6346160	1.51664	NA	NA
2021-03-19 03:00:00	OP-200m	UA-100m	MC	451.591	40.787	21.5384	0.565942	0.0385214	1.6	0.599	4.363	3.054	1.752	9.518	0.08	-0.902654	32.295	0.601233	964.4	-1.91327	92.7133	0	0	NA	NA	NA	NA	0	NA	NA	NA	2.82785e-05	5375103	1.53753	NA	NA
2021-03-19 03:00:00	OP-50m	UA-100m	MC	451.591	40.787	21.5384	0.565942	0.0385214	1.6	0.599	4.363	3.054	1.752	9.518	0.08	-0.902654	32.295	0.601233	964.4	-1.91327	92.7133	0	0	NA	NA	NA	NA	0	NA	NA	NA	4.15786e-05	11324276	1.54041	NA	NA
2021-03-19 03:00:00	OP-UW	UA-100m	MC	451.591	40.787	21.5384	0.565942	0.0385214	1.6	0.599	4.363	3.054	1.752	9.518	0.08	-0.902654	32.295	0.601233	964.4	-1.91327	92.7133	0	0	NA	NA	NA	NA	0	NA	NA	NA	NA	0	1.51591	NA	NA
2021-03-19 03:00:00	OP-100m	UA-150m	MC	451.591	35.313	39.6229	0.461581	0.0273683	3.3	0.04901	4.307	2.817	1.661	8.295	0.08	-0.902654	32.295	0.601233	964.4	-1.91327	92.7133	0	0	NA	NA	NA	NA	0	NA	NA	NA	4.33216e-05	5538531	1.54545	NA	NA
2021-03-19 03:00:00	OP-150m	UA-150m	MC	451.591	35.313	39.6229	0.461581	0.0273683	3.3	0.04901	4.307	2.817	1.661	8.295	0.08	-0.902654	32.295	0.601233	964.4	-1.91327	92.7133	0	0	NA	NA	NA	NA	0	NA	NA	NA	3.83572e-05	4538218	1.51664	NA	NA
2021-03-19 03:00:00	OP-200m	UA-150m	MC	451.591	35.313	39.6229	0.461581	0.0273683	3.3	0.04901	4.307	2.817	1.661	8.295	0.08	-0.902654	32.295	0.601233	964.4	-1.91327	92.7133	0	0	NA	NA	NA	NA	0	NA	NA	NA	3.29362e-05	3728599	1.53753	NA	NA
2021-03-19 03:00:00	OP-50m	UA-150m	MC	451.591	35.313	39.6229	0.461581	0.0273683	3.3	0.04901	4.307	2.817	1.661	8.295	0.08	-0.902654	32.295	0.601233	964.4	-1.91327	92.7133	0	0	NA	NA	NA	NA	0	NA	NA	NA	4.62852e-05	7219359	1.54041	NA	NA
2021-03-19 03:00:00	OP-UW	UA-150m	MC	451.591	35.313	39.6229	0.461581	0.0273683	3.3	0.04901	4.307	2.817	1.661	8.295	0.08	-0.902654	32.295	0.601233	964.4	-1.91327	92.7133	0	0	NA	NA	NA	NA	0	NA	NA	NA	NA	0	1.51591	NA	NA
2021-03-19 03:10:00	OP-100m	UA-UW	MC	451.591	60.616	17.6378	0.705354	0.0663872	17.3	0.05001	3.268	2.666	1.649	8.145	0.2	-0.81327	80.3684	0.222465	964.313	-1.98673	91.7327	0	0	NA	NA	NA	NA	0	NA	NA	NA	1.41824e-05	3595055	1.5016	NA	NA
2021-03-19 03:10:00	OP-150m	UA-UW	MC	451.591	60.616	17.6378	0.705354	0.0663872	17.3	0.05001	3.268	2.666	1.649	8.145	0.2	-0.81327	80.3684	0.222465	964.313	-1.98673	91.7327	0	0	NA	NA	NA	NA	0	NA	NA	NA	9.07759e-06	2129315	1.48948	NA	NA
2021-03-19 03:10:00	OP-200m	UA-UW	MC	451.591	60.616	17.6378	0.705354	0.0663872	17.3	0.05001	3.268	2.666	1.649	8.145	0.2	-0.81327	80.3684	0.222465	964.313	-1.98673	91.7327	0	0	NA	NA	NA	NA	0	NA	NA	NA	6.14687e-06	976536	1.50353	NA	NA
2021-03-19 03:10:00	OP-50m	UA-UW	MC	451.591	60.616	17.6378	0.705354	0.0663872	17.3	0.05001	3.268	2.666	1.649	8.145	0.2	-0.81327	80.3684	0.222465	964.313	-1.98673	91.7327	0	0	NA	NA	NA	NA	0	NA	NA	NA	1.61467e-05	5466812	1.4825	NA	NA
2021-03-19 03:10:00	OP-UW	UA-UW	MC	451.591	60.616	17.6378	0.705354	0.0663872	17.3	0.05001	3.268	2.666	1.649	8.145	0.2	-0.81327	80.3684	0.222465	964.313	-1.98673	91.7327	0	0	NA	NA	NA	NA	0	NA	NA	NA	NA	0	1.46602	NA	NA
2021-03-19 03:20:00	OP-100m	UA-UW	MC	451.591	57.067	11.29	0.951702	0.0584957	7.8	0.01039	3.943	3.119	2.137	16.363	0.2	-0.74327	104.901	0.367534	964.3	-2.03673	91.046	0	0	NA	NA	NA	NA	0	NA	NA	NA	1.3764e-05	4734475	1.46575	NA	NA
2021-03-19 03:20:00	OP-150m	UA-UW	MC	451.591	57.067	11.29	0.951702	0.0584957	7.8	0.01039	3.943	3.119	2.137	16.363	0.2	-0.74327	104.901	0.367534	964.3	-2.03673	91.046	0	0	NA	NA	NA	NA	0	NA	NA	NA	1.23925e-05	3725689	1.45139	NA	NA
2021-03-19 03:20:00	OP-200m	UA-UW	MC	451.591	57.067	11.29	0.951702	0.0584957	7.8	0.01039	3.943	3.119	2.137	16.363	0.2	-0.74327	104.901	0.367534	964.3	-2.03673	91.046	0	0	NA	NA	NA	NA	0	NA	NA	NA	9.33857e-06	2569802	1.46265	NA	NA
2021-03-19 03:20:00	OP-50m	UA-UW	MC	451.591	57.067	11.29	0.951702	0.0584957	7.8	0.01039	3.943	3.119	2.137	16.363	0.2	-0.74327	104.901	0.367534	964.3	-2.03673	91.046	0	0	NA	NA	NA	NA	0	NA	NA	NA	1.69443e-05	6517641	1.46208	NA	NA
2021-03-19 03:20:00	OP-UW	UA-UW	MC	451.591	57.067	11.29	0.951702	0.0584957	7.8	0.01039	3.943	3.119	2.137	16.363	0.2	-0.74327	104.901	0.367534	964.3	-2.03673	91.046	0	0	NA	NA	NA	NA	0	NA	NA	NA	NA	0	1.45904	NA	NA
2021-03-19 03:20:00	OP-100m	UA-150m	MC	451.591	89.779	56.8942	0.238961	0.0528974	41.4	0.4204	3.069	3.708	1.727	9.168	0.08	-0.74327	104.901	0.367534	964.3	-2.03673	91.046	0	0	NA	NA	NA	NA	0	NA	NA	NA	5.64847e-06	438116	1.46575	NA	NA
2021-03-19 03:20:00	OP-150m	UA-150m	MC	451.591	89.779	56.8942	0.238961	0.0528974	41.4	0.4204	3.069	3.708	1.727	9.168	0.08	-0.74327	104.901	0.367534	964.3	-2.03673	91.046	0	0	NA	NA	NA	NA	0	NA	NA	NA	2.13597e-06	88800	1.45139	NA	NA
2021-03-19 03:20:00	OP-200m	UA-150m	MC	451.591	89.779	56.8942	0.238961	0.0528974	41.4	0.4204	3.069	3.708	1.727	9.168	0.08	-0.74327	104.901	0.367534	964.3	-2.03673	91.046	0	0	NA	NA	NA	NA	0	NA	NA	NA	1.5223e-06	18020	1.46265	NA	NA
2021-03-19 03:20:00	OP-50m	UA-150m	MC	451.591	89.779	56.8942	0.238961	0.0528974	41.4	0.4204	3.069	3.708	1.727	9.168	0.08	-0.74327	104.901	0.367534	964.3	-2.03673	91.046	0	0	NA	NA	NA	NA	0	NA	NA	NA	1.07066e-05	2216911	1.46208	NA	NA
2021-03-19 03:20:00	OP-UW	UA-150m	MC	451.591	89.779	56.8942	0.238961	0.0528974	41.4	0.4204	3.069	3.708	1.727	9.168	0.08	-0.74327	104.901	0.367534	964.3	-2.03673	91.046	0	0	NA	NA	NA	NA	0	NA	NA	NA	NA	0	1.45904	NA	NA
2021-03-19 03:30:00	OP-100m	UA-UW	MC	451.591	47.225	11.2999	1.10581	0.103238	116.9	0.03031	2.254	2.002	1.215	4.187	0.2	-0.7	55.104	0.787534	964.263	-2.1	90.4469	0	0	NA	NA	NA	NA	0	NA	NA	NA	9.71155e-06	2499516	1.47259	NA	NA
2021-03-19 03:30:00	OP-150m	UA-UW	MC	451.591	47.225	11.2999	1.10581	0.103238	116.9	0.03031	2.254	2.002	1.215	4.187	0.2	-0.7	55.104	0.787534	964.263	-2.1	90.4469	0	0	NA	NA	NA	NA	0	NA	NA	NA	9.44738e-06	1839812	1.44537	NA	NA
2021-03-19 03:30:00	OP-200m	UA-UW	MC	451.591	47.225	11.2999	1.10581	0.103238	116.9	0.03031	2.254	2.002	1.215	4.187	0.2	-0.7	55.104	0.787534	964.263	-2.1	90.4469	0	0	NA	NA	NA	NA	0	NA	NA	NA	7.13738e-06	1488470	1.45185	NA	NA
2021-03-19 03:30:00	OP-50m	UA-UW	MC	451.591	47.225	11.2999	1.10581	0.103238	116.9	0.03031	2.254	2.002	1.215	4.187	0.2	-0.7	55.104	0.787534	964.263	-2.1	90.4469	0	0	NA	NA	NA	NA	0	NA	NA	NA	1.26432e-05	3935818	1.47358	NA	NA
2021-03-19 03:30:00	OP-UW	UA-UW	MC	451.591	47.225	11.2999	1.10581	0.103238	116.9	0.03031	2.254	2.002	1.215	4.187	0.2	-0.7	55.104	0.787534	964.263	-2.1	90.4469	0	0	NA	NA	NA	NA	0	NA	NA	NA	NA	0	1.47886	NA	NA
2021-03-19 03:30:00	OP-100m	UA-100m	MC	451.591	44.71	15.188	0.959831	0.122782	12.7	0.1907	2.894	1.776	1.108	3.62	0.08	-0.7	55.104	0.787534	964.263	-2.1	90.4469	0	0	NA	NA	NA	NA	0	NA	NA	NA	9.85584e-06	3626304	1.47259	NA	NA
2021-03-19 03:30:00	OP-150m	UA-100m	MC	451.591	44.71	15.188	0.959831	0.122782	12.7	0.1907	2.894	1.776	1.108	3.62	0.08	-0.7	55.104	0.787534	964.263	-2.1	90.4469	0	0	NA	NA	NA	NA	0	NA	NA	NA	1.08698e-05	2819867	1.44537	NA	NA
2021-03-19 03:30:00	OP-200m	UA-100m	MC	451.591	44.71	15.188	0.959831	0.122782	12.7	0.1907	2.894	1.776	1.108	3.62	0.08	-0.7	55.104	0.787534	964.263	-2.1	90.4469	0	0	NA	NA	NA	NA	0	NA	NA	NA	8.81559e-06	2361092	1.45185	NA	NA
2021-03-19 03:30:00	OP-50m	UA-100m	MC	451.591	44.71	15.188	0.959831	0.122782	12.7	0.1907	2.894	1.776	1.108	3.62	0.08	-0.7	55.104	0.787534	964.263	-2.1	90.4469	0	0	NA	NA	NA	NA	0	NA	NA	NA	1.32959e-05	5348134	1.47358	NA	NA
2021-03-19 03:30:00	OP-UW	UA-100m	MC	451.591	44.71	15.188	0.959831	0.122782	12.7	0.1907	2.894	1.776	1.108	3.62	0.08	-0.7	55.104	0.787534	964.263	-2.1	90.4469	0	0	NA	NA	NA	NA	0	NA	NA	NA	NA	0	1.47886	NA	NA
2021-03-19 03:30:00	OP-100m	UA-150m	MC	451.591	51.487	15.0368	0.868622	0.0871268	6.3	0.1717	3.637	2.547	1.286	4.647	0.08	-0.7	55.104	0.787534	964.263	-2.1	90.4469	0	0	NA	NA	NA	NA	0	NA	NA	NA	1.56539e-05	4578465	1.47259	NA	NA
2021-03-19 03:30:00	OP-150m	UA-150m	MC	451.591	51.487	15.0368	0.868622	0.0871268	6.3	0.1717	3.637	2.547	1.286	4.647	0.08	-0.7	55.104	0.787534	964.263	-2.1	90.4469	0	0	NA	NA	NA	NA	0	NA	NA	NA	1.22799e-05	3666869	1.44537	NA	NA
2021-03-19 03:30:00	OP-200m	UA-150m	MC	451.591	51.487	15.0368	0.868622	0.0871268	6.3	0.1717	3.637	2.547	1.286	4.647	0.08	-0.7	55.104	0.787534	964.263	-2.1	90.4469	0	0	NA	NA	NA	NA	0	NA	NA	NA	1.31895e-05	2963359	1.45185	NA	NA
2021-03-19 03:30:00	OP-50m	UA-150m	MC	451.591	51.487	15.0368	0.868622	0.0871268	6.3	0.1717	3.637	2.547	1.286	4.647	0.08	-0.7	55.104	0.787534	964.263	-2.1	90.4469	0	0	NA	NA	NA	NA	0	NA	NA	NA	1.80579e-05	6489255	1.47358	NA	NA
2021-03-19 03:30:00	OP-UW	UA-150m	MC	451.591	51.487	15.0368	0.868622	0.0871268	6.3	0.1717	3.637	2.547	1.286	4.647	0.08	-0.7	55.104	0.787534	964.263	-2.1	90.4469	0	0	NA	NA	NA	NA	0	NA	NA	NA	NA	0	1.47886	NA	NA
2021-03-19 03:40:00	OP-100m	UA-UW	MC	451.591	61.564	10.8486	1.3365	0.0805671	36.1	0.003465	3.713	2.81	1.651	8.17	0.2	-0.791421	61.9529	1.03019	964.2	-2.1	91.0102	0	0	NA	NA	NA	NA	0	NA	NA	NA	1.08543e-05	2940459	1.51526	NA	NA
2021-03-19 03:40:00	OP-150m	UA-UW	MC	451.591	61.564	10.8486	1.3365	0.0805671	36.1	0.003465	3.713	2.81	1.651	8.17	0.2	-0.791421	61.9529	1.03019	964.2	-2.1	91.0102	0	0	NA	NA	NA	NA	0	NA	NA	NA	7.12305e-06	1609070	1.48871	NA	NA
2021-03-19 03:40:00	OP-200m	UA-UW	MC	451.591	61.564	10.8486	1.3365	0.0805671	36.1	0.003465	3.713	2.81	1.651	8.17	0.2	-0.791421	61.9529	1.03019	964.2	-2.1	91.0102	0	0	NA	NA	NA	NA	0	NA	NA	NA	4.97049e-06	576088	1.50201	NA	NA
2021-03-19 03:40:00	OP-50m	UA-UW	MC	451.591	61.564	10.8486	1.3365	0.0805671	36.1	0.003465	3.713	2.81	1.651	8.17	0.2	-0.791421	61.9529	1.03019	964.2	-2.1	91.0102	0	0	NA	NA	NA	NA	0	NA	NA	NA	1.36349e-05	4410850	1.5137	NA	NA
2021-03-19 03:40:00	OP-UW	UA-UW	MC	451.591	61.564	10.8486	1.3365	0.0805671	36.1	0.003465	3.713	2.81	1.651	8.17	0.2	-0.791421	61.9529	1.03019	964.2	-2.1	91.0102	0	0	NA	NA	NA	NA	0	NA	NA	NA	NA	0	1.50994	NA	NA
2021-03-19 03:40:00	OP-100m	UA-100m	MC	451.591	75.034	10.0886	0.927648	0.065049	4.5	0.06268	2.969	2.347	1.477	6.239	0.08	-0.791421	61.9529	1.03019	964.2	-2.1	91.0102	0	0	NA	NA	NA	NA	0	NA	NA	NA	6.0222e-06	871562	1.51526	NA	NA
2021-03-19 03:40:00	OP-150m	UA-100m	MC	451.591	75.034	10.0886	0.927648	0.065049	4.5	0.06268	2.969	2.347	1.477	6.239	0.08	-0.791421	61.9529	1.03019	964.2	-2.1	91.0102	0	0	NA	NA	NA	NA	0	NA	NA	NA	5.63688e-08	837	1.48871	NA	NA
2021-03-19 03:40:00	OP-200m	UA-100m	MC	451.591	75.034	10.0886	0.927648	0.065049	4.5	0.06268	2.969	2.347	1.477	6.239	0.08	-0.791421	61.9529	1.03019	964.2	-2.1	91.0102	0	0	NA	NA	NA	NA	0	NA	NA	NA	NA	0	1.50201	NA	NA
2021-03-19 03:40:00	OP-50m	UA-100m	MC	451.591	75.034	10.0886	0.927648	0.065049	4.5	0.06268	2.969	2.347	1.477	6.239	0.08	-0.791421	61.9529	1.03019	964.2	-2.1	91.0102	0	0	NA	NA	NA	NA	0	NA	NA	NA	2.06636e-05	6959063	1.5137	NA	NA
2021-03-19 03:40:00	OP-UW	UA-100m	MC	451.591	75.034	10.0886	0.927648	0.065049	4.5	0.06268	2.969	2.347	1.477	6.239	0.08	-0.791421	61.9529	1.03019	964.2	-2.1	91.0102	0	0	NA	NA	NA	NA	0	NA	NA	NA	NA	0	1.50994	NA	NA
2021-03-19 03:40:00	OP-100m	UA-150m	MC	451.591	79.725	12.1729	0.983253	0.0566578	4.7	0.01705	3.759	3.53	1.487	6.337	0.08	-0.791421	61.9529	1.03019	964.2	-2.1	91.0102	0	0	NA	NA	NA	NA	0	NA	NA	NA	4.42554e-06	407930	1.51526	NA	NA
2021-03-19 03:40:00	OP-150m	UA-150m	MC	451.591	79.725	12.1729	0.983253	0.0566578	4.7	0.01705	3.759	3.53	1.487	6.337	0.08	-0.791421	61.9529	1.03019	964.2	-2.1	91.0102	0	0	NA	NA	NA	NA	0	NA	NA	NA	5.50632e-07	5443	1.48871	NA	NA
2021-03-19 03:40:00	OP-200m	UA-150m	MC	451.591	79.725	12.1729	0.983253	0.0566578	4.7	0.01705	3.759	3.53	1.487	6.337	0.08	-0.791421	61.9529	1.03019	964.2	-2.1	91.0102	0	0	NA	NA	NA	NA	0	NA	NA	NA	4.18418e-08	115	1.50201	NA	NA
2021-03-19 03:40:00	OP-50m	UA-150m	MC	451.591	79.725	12.1729	0.983253	0.0566578	4.7	0.01705	3.759	3.53	1.487	6.337	0.08	-0.791421	61.9529	1.03019	964.2	-2.1	91.0102	0	0	NA	NA	NA	NA	0	NA	NA	NA	1.95158e-05	4890176	1.5137	NA	NA
2021-03-19 03:40:00	OP-UW	UA-150m	MC	451.591	79.725	12.1729	0.983253	0.0566578	4.7	0.01705	3.759	3.53	1.487	6.337	0.08	-0.791421	61.9529	1.03019	964.2	-2.1	91.0102	0	0	NA	NA	NA	NA	0	NA	NA	NA	NA	0	1.50994	NA	NA
2021-03-19 03:50:00	OP-100m	UA-UW	MC	451.591	60.23	7.29821	1.57509	0.0854425	25.5	0.001869	2.906	2.329	1.694	8.722	0.2	-0.892038	67.2772	1.37284	964.163	-2.18673	91.2735	0	0	NA	NA	NA	NA	0	NA	NA	NA	1.0169e-05	3124674	1.53015	NA	NA
2021-03-19 03:50:00	OP-150m	UA-UW	MC	451.591	60.23	7.29821	1.57509	0.0854425	25.5	0.001869	2.906	2.329	1.694	8.722	0.2	-0.892038	67.2772	1.37284	964.163	-2.18673	91.2735	0	0	NA	NA	NA	NA	0	NA	NA	NA	8.0175e-06	2145776	1.509	NA	NA
2021-03-19 03:50:00	OP-200m	UA-UW	MC	451.591	60.23	7.29821	1.57509	0.0854425	25.5	0.001869	2.906	2.329	1.694	8.722	0.2	-0.892038	67.2772	1.37284	964.163	-2.18673	91.2735	0	0	NA	NA	NA	NA	0	NA	NA	NA	4.10104e-06	817563	1.52899	NA	NA
2021-03-19 03:50:00	OP-50m	UA-UW	MC	451.591	60.23	7.29821	1.57509	0.0854425	25.5	0.001869	2.906	2.329	1.694	8.722	0.2	-0.892038	67.2772	1.37284	964.163	-2.18673	91.2735	0	0	NA	NA	NA	NA	0	NA	NA	NA	1.27345e-05	4394836	1.52559	NA	NA
2021-03-19 03:50:00	OP-UW	UA-UW	MC	451.591	60.23	7.29821	1.57509	0.0854425	25.5	0.001869	2.906	2.329	1.694	8.722	0.2	-0.892038	67.2772	1.37284	964.163	-2.18673	91.2735	0	0	NA	NA	NA	NA	0	NA	NA	NA	NA	0	1.50538	NA	NA
2021-03-19 03:50:00	OP-100m	UA-100m	MC	451.591	68.302	8.94199	1.08775	0.0741999	8.2	0.0203	2.614	2.328	1.315	4.855	0.08	-0.892038	67.2772	1.37284	964.163	-2.18673	91.2735	0	0	NA	NA	NA	NA	0	NA	NA	NA	1.16179e-05	2959676	1.53015	NA	NA
2021-03-19 03:50:00	OP-150m	UA-100m	MC	451.591	68.302	8.94199	1.08775	0.0741999	8.2	0.0203	2.614	2.328	1.315	4.855	0.08	-0.892038	67.2772	1.37284	964.163	-2.18673	91.2735	0	0	NA	NA	NA	NA	0	NA	NA	NA	2.59137e-06	278686	1.509	NA	NA
2021-03-19 03:50:00	OP-200m	UA-100m	MC	451.591	68.302	8.94199	1.08775	0.0741999	8.2	0.0203	2.614	2.328	1.315	4.855	0.08	-0.892038	67.2772	1.37284	964.163	-2.18673	91.2735	0	0	NA	NA	NA	NA	0	NA	NA	NA	1.84262e-07	2296	1.52899	NA	NA
2021-03-19 03:50:00	OP-50m	UA-100m	MC	451.591	68.302	8.94199	1.08775	0.0741999	8.2	0.0203	2.614	2.328	1.315	4.855	0.08	-0.892038	67.2772	1.37284	964.163	-2.18673	91.2735	0	0	NA	NA	NA	NA	0	NA	NA	NA	1.82821e-05	5636821	1.52559	NA	NA
2021-03-19 03:50:00	OP-UW	UA-100m	MC	451.591	68.302	8.94199	1.08775	0.0741999	8.2	0.0203	2.614	2.328	1.315	4.855	0.08	-0.892038	67.2772	1.37284	964.163	-2.18673	91.2735	0	0	NA	NA	NA	NA	0	NA	NA	NA	NA	0	1.50538	NA	NA
2021-03-19 03:50:00	OP-100m	UA-150m	MC	451.591	68.623	6.86632	1.22673	0.0674855	6.5	0.006921	2.749	2.098	1.262	4.484	0.08	-0.892038	67.2772	1.37284	964.163	-2.18673	91.2735	0	0	NA	NA	NA	NA	0	NA	NA	NA	1.36278e-05	2728489	1.53015	NA	NA
2021-03-19 03:50:00	OP-150m	UA-150m	MC	451.591	68.623	6.86632	1.22673	0.0674855	6.5	0.006921	2.749	2.098	1.262	4.484	0.08	-0.892038	67.2772	1.37284	964.163	-2.18673	91.2735	0	0	NA	NA	NA	NA	0	NA	NA	NA	2.22343e-06	160904	1.509	NA	NA
2021-03-19 03:50:00	OP-200m	UA-150m	MC	451.591	68.623	6.86632	1.22673	0.0674855	6.5	0.006921	2.749	2.098	1.262	4.484	0.08	-0.892038	67.2772	1.37284	964.163	-2.18673	91.2735	0	0	NA	NA	NA	NA	0	NA	NA	NA	4.92687e-08	359	1.52899	NA	NA
2021-03-19 03:50:00	OP-50m	UA-150m	MC	451.591	68.623	6.86632	1.22673	0.0674855	6.5	0.006921	2.749	2.098	1.262	4.484	0.08	-0.892038	67.2772	1.37284	964.163	-2.18673	91.2735	0	0	NA	NA	NA	NA	0	NA	NA	NA	2.14637e-05	4962602	1.52559	NA	NA
2021-03-19 03:50:00	OP-UW	UA-150m	MC	451.591	68.623	6.86632	1.22673	0.0674855	6.5	0.006921	2.749	2.098	1.262	4.484	0.08	-0.892038	67.2772	1.37284	964.163	-2.18673	91.2735	0	0	NA	NA	NA	NA	0	NA	NA	NA	NA	0	1.50538	NA	NA
2021-03-19 04:00:00	OP-100m	UA-UW	MC	451.591	88.029	11.7507	1.19704	0.0548167	17.2	0.0005879	2.96	3.466	1.401	5.542	0.2	-1.02346	78.7907	1.12308	964.063	-2.2	92.1509	0	0	NA	NA	NA	NA	0	NA	NA	NA	7.04672e-07	9767	1.52933	NA	NA
2021-03-19 04:00:00	OP-150m	UA-UW	MC	451.591	88.029	11.7507	1.19704	0.0548167	17.2	0.0005879	2.96	3.466	1.401	5.542	0.2	-1.02346	78.7907	1.12308	964.063	-2.2	92.1509	0	0	NA	NA	NA	NA	0	NA	NA	NA	NA	0	1.49839	NA	NA
2021-03-19 04:00:00	OP-200m	UA-UW	MC	451.591	88.029	11.7507	1.19704	0.0548167	17.2	0.0005879	2.96	3.466	1.401	5.542	0.2	-1.02346	78.7907	1.12308	964.063	-2.2	92.1509	0	0	NA	NA	NA	NA	0	NA	NA	NA	NA	0	1.51088	NA	NA
2021-03-19 04:00:00	OP-50m	UA-UW	MC	451.591	88.029	11.7507	1.19704	0.0548167	17.2	0.0005879	2.96	3.466	1.401	5.542	0.2	-1.02346	78.7907	1.12308	964.063	-2.2	92.1509	0	0	NA	NA	NA	NA	0	NA	NA	NA	1.40099e-05	1596283	1.5246	NA	NA
2021-03-19 04:00:00	OP-UW	UA-UW	MC	451.591	88.029	11.7507	1.19704	0.0548167	17.2	0.0005879	2.96	3.466	1.401	5.542	0.2	-1.02346	78.7907	1.12308	964.063	-2.2	92.1509	0	0	NA	NA	NA	NA	0	NA	NA	NA	NA	0	1.5173	NA	NA
2021-03-19 04:00:00	OP-100m	UA-100m	MC	451.591	89.023	7.4812	1.2903	0.0534956	7	0.0005883	2.578	3.033	1.456	6.038	0.08	-1.02346	78.7907	1.12308	964.063	-2.2	92.1509	0	0	NA	NA	NA	NA	0	NA	NA	NA	5.17175e-08	87	1.52933	NA	NA
2021-03-19 04:00:00	OP-150m	UA-100m	MC	451.591	89.023	7.4812	1.2903	0.0534956	7	0.0005883	2.578	3.033	1.456	6.038	0.08	-1.02346	78.7907	1.12308	964.063	-2.2	92.1509	0	0	NA	NA	NA	NA	0	NA	NA	NA	NA	0	1.49839	NA	NA
2021-03-19 04:00:00	OP-200m	UA-100m	MC	451.591	89.023	7.4812	1.2903	0.0534956	7	0.0005883	2.578	3.033	1.456	6.038	0.08	-1.02346	78.7907	1.12308	964.063	-2.2	92.1509	0	0	NA	NA	NA	NA	0	NA	NA	NA	NA	0	1.51088	NA	NA
2021-03-19 04:00:00	OP-50m	UA-100m	MC	451.591	89.023	7.4812	1.2903	0.0534956	7	0.0005883	2.578	3.033	1.456	6.038	0.08	-1.02346	78.7907	1.12308	964.063	-2.2	92.1509	0	0	NA	NA	NA	NA	0	NA	NA	NA	1.32857e-05	1415206	1.5246	NA	NA
2021-03-19 04:00:00	OP-UW	UA-100m	MC	451.591	89.023	7.4812	1.2903	0.0534956	7	0.0005883	2.578	3.033	1.456	6.038	0.08	-1.02346	78.7907	1.12308	964.063	-2.2	92.1509	0	0	NA	NA	NA	NA	0	NA	NA	NA	NA	0	1.5173	NA	NA
2021-03-19 04:00:00	OP-100m	UA-150m	MC	451.591	90.216	6.79633	1.25802	0.0537409	5.3	0.001189	2.504	2.674	1.405	5.576	0.08	-1.02346	78.7907	1.12308	964.063	-2.2	92.1509	0	0	NA	NA	NA	NA	0	NA	NA	NA	NA	0	1.52933	NA	NA
2021-03-19 04:00:00	OP-150m	UA-150m	MC	451.591	90.216	6.79633	1.25802	0.0537409	5.3	0.001189	2.504	2.674	1.405	5.576	0.08	-1.02346	78.7907	1.12308	964.063	-2.2	92.1509	0	0	NA	NA	NA	NA	0	NA	NA	NA	NA	0	1.49839	NA	NA
2021-03-19 04:00:00	OP-200m	UA-150m	MC	451.591	90.216	6.79633	1.25802	0.0537409	5.3	0.001189	2.504	2.674	1.405	5.576	0.08	-1.02346	78.7907	1.12308	964.063	-2.2	92.1509	0	0	NA	NA	NA	NA	0	NA	NA	NA	NA	0	1.51088	NA	NA
2021-03-19 04:00:00	OP-50m	UA-150m	MC	451.591	90.216	6.79633	1.25802	0.0537409	5.3	0.001189	2.504	2.674	1.405	5.576	0.08	-1.02346	78.7907	1.12308	964.063	-2.2	92.1509	0	0	NA	NA	NA	NA	0	NA	NA	NA	9.46799e-06	1099086	1.5246	NA	NA
2021-03-19 04:00:00	OP-UW	UA-150m	MC	451.591	90.216	6.79633	1.25802	0.0537409	5.3	0.001189	2.504	2.674	1.405	5.576	0.08	-1.02346	78.7907	1.12308	964.063	-2.2	92.1509	0	0	NA	NA	NA	NA	0	NA	NA	NA	NA	0	1.5173	NA	NA
2021-03-19 04:10:00	OP-100m	UA-UW	MC	451.591	80.729	5.38958	1.23958	0.0663212	20	0.001883	2.238	1.625	1.251	4.411	0.2	-1.17673	85.5135	0.976542	963.963	-2.11327	93.3571	0	0	NA	NA	NA	NA	0	NA	NA	NA	1.15088e-07	1314	1.48596	NA	NA
2021-03-19 04:10:00	OP-150m	UA-UW	MC	451.591	80.729	5.38958	1.23958	0.0663212	20	0.001883	2.238	1.625	1.251	4.411	0.2	-1.17673	85.5135	0.976542	963.963	-2.11327	93.3571	0	0	NA	NA	NA	NA	0	NA	NA	NA	NA	0	1.4546	NA	NA
2021-03-19 04:10:00	OP-200m	UA-UW	MC	451.591	80.729	5.38958	1.23958	0.0663212	20	0.001883	2.238	1.625	1.251	4.411	0.2	-1.17673	85.5135	0.976542	963.963	-2.11327	93.3571	0	0	NA	NA	NA	NA	0	NA	NA	NA	NA	0	1.46797	NA	NA
2021-03-19 04:10:00	OP-50m	UA-UW	MC	451.591	80.729	5.38958	1.23958	0.0663212	20	0.001883	2.238	1.625	1.251	4.411	0.2	-1.17673	85.5135	0.976542	963.963	-2.11327	93.3571	0	0	NA	NA	NA	NA	0	NA	NA	NA	1.77942e-05	3375273	1.47557	NA	NA
2021-03-19 04:10:00	OP-UW	UA-UW	MC	451.591	80.729	5.38958	1.23958	0.0663212	20	0.001883	2.238	1.625	1.251	4.411	0.2	-1.17673	85.5135	0.976542	963.963	-2.11327	93.3571	0	0	NA	NA	NA	NA	0	NA	NA	NA	NA	0	1.47031	NA	NA
2021-03-19 04:10:00	OP-100m	UA-100m	MC	451.591	81.761	7.9926	1.07181	0.0538909	7.6	0.002778	3.386	2.393	1.216	4.193	0.08	-1.17673	85.5135	0.976542	963.963	-2.11327	93.3571	0	0	NA	NA	NA	NA	0	NA	NA	NA	7.82387e-07	17919	1.48596	NA	NA
2021-03-19 04:10:00	OP-150m	UA-100m	MC	451.591	81.761	7.9926	1.07181	0.0538909	7.6	0.002778	3.386	2.393	1.216	4.193	0.08	-1.17673	85.5135	0.976542	963.963	-2.11327	93.3571	0	0	NA	NA	NA	NA	0	NA	NA	NA	NA	0	1.4546	NA	NA
2021-03-19 04:10:00	OP-200m	UA-100m	MC	451.591	81.761	7.9926	1.07181	0.0538909	7.6	0.002778	3.386	2.393	1.216	4.193	0.08	-1.17673	85.5135	0.976542	963.963	-2.11327	93.3571	0	0	NA	NA	NA	NA	0	NA	NA	NA	NA	0	1.46797	NA	NA
2021-03-19 04:10:00	OP-50m	UA-100m	MC	451.591	81.761	7.9926	1.07181	0.0538909	7.6	0.002778	3.386	2.393	1.216	4.193	0.08	-1.17673	85.5135	0.976542	963.963	-2.11327	93.3571	0	0	NA	NA	NA	NA	0	NA	NA	NA	2.30043e-05	3347294	1.47557	NA	NA
2021-03-19 04:10:00	OP-UW	UA-100m	MC	451.591	81.761	7.9926	1.07181	0.0538909	7.6	0.002778	3.386	2.393	1.216	4.193	0.08	-1.17673	85.5135	0.976542	963.963	-2.11327	93.3571	0	0	NA	NA	NA	NA	0	NA	NA	NA	NA	0	1.47031	NA	NA
2021-03-19 04:10:00	OP-100m	UA-150m	MC	451.591	82.205	7.30041	1.06635	0.0453533	3.9	0.002342	2.884	3.051	1.58	7.324	0.08	-1.17673	85.5135	0.976542	963.963	-2.11327	93.3571	0	0	NA	NA	NA	NA	0	NA	NA	NA	6.61315e-07	15139	1.48596	NA	NA
2021-03-19 04:10:00	OP-150m	UA-150m	MC	451.591	82.205	7.30041	1.06635	0.0453533	3.9	0.002342	2.884	3.051	1.58	7.324	0.08	-1.17673	85.5135	0.976542	963.963	-2.11327	93.3571	0	0	NA	NA	NA	NA	0	NA	NA	NA	NA	0	1.4546	NA	NA
2021-03-19 04:10:00	OP-200m	UA-150m	MC	451.591	82.205	7.30041	1.06635	0.0453533	3.9	0.002342	2.884	3.051	1.58	7.324	0.08	-1.17673	85.5135	0.976542	963.963	-2.11327	93.3571	0	0	NA	NA	NA	NA	0	NA	NA	NA	NA	0	1.46797	NA	NA
2021-03-19 04:10:00	OP-50m	UA-150m	MC	451.591	82.205	7.30041	1.06635	0.0453533	3.9	0.002342	2.884	3.051	1.58	7.324	0.08	-1.17673	85.5135	0.976542	963.963	-2.11327	93.3571	0	0	NA	NA	NA	NA	0	NA	NA	NA	2.17729e-05	3981068	1.47557	NA	NA
2021-03-19 04:10:00	OP-UW	UA-150m	MC	451.591	82.205	7.30041	1.06635	0.0453533	3.9	0.002342	2.884	3.051	1.58	7.324	0.08	-1.17673	85.5135	0.976542	963.963	-2.11327	93.3571	0	0	NA	NA	NA	NA	0	NA	NA	NA	NA	0	1.47031	NA	NA
2021-03-19 04:20:00	OP-100m	UA-UW	MC	451.591	85.694	8.09227	1.01773	0.0453075	82.4	0.0003021	2.852	2.037	1.49	6.367	0.2	-1.2	84.5336	0.844692	963.863	-2.15	93.6836	0	0	NA	NA	NA	NA	0	NA	NA	NA	1.00518e-09	4	1.48097	NA	NA
2021-03-19 04:20:00	OP-150m	UA-UW	MC	451.591	85.694	8.09227	1.01773	0.0453075	82.4	0.0003021	2.852	2.037	1.49	6.367	0.2	-1.2	84.5336	0.844692	963.863	-2.15	93.6836	0	0	NA	NA	NA	NA	0	NA	NA	NA	NA	0	1.45087	NA	NA
2021-03-19 04:20:00	OP-200m	UA-UW	MC	451.591	85.694	8.09227	1.01773	0.0453075	82.4	0.0003021	2.852	2.037	1.49	6.367	0.2	-1.2	84.5336	0.844692	963.863	-2.15	93.6836	0	0	NA	NA	NA	NA	0	NA	NA	NA	NA	0	1.46872	NA	NA
2021-03-19 04:20:00	OP-50m	UA-UW	MC	451.591	85.694	8.09227	1.01773	0.0453075	82.4	0.0003021	2.852	2.037	1.49	6.367	0.2	-1.2	84.5336	0.844692	963.863	-2.15	93.6836	0	0	NA	NA	NA	NA	0	NA	NA	NA	1.51198e-05	1843912	1.47188	NA	NA
2021-03-19 04:20:00	OP-UW	UA-UW	MC	451.591	85.694	8.09227	1.01773	0.0453075	82.4	0.0003021	2.852	2.037	1.49	6.367	0.2	-1.2	84.5336	0.844692	963.863	-2.15	93.6836	0	0	NA	NA	NA	NA	0	NA	NA	NA	NA	0	1.45198	NA	NA
2021-03-19 04:20:00	OP-100m	UA-100m	MC	451.591	89.323	6.23452	1.12247	0.0520058	4.6	0.003439	3.047	1.979	1.44	5.889	0.08	-1.2	84.5336	0.844692	963.863	-2.15	93.6836	0	0	NA	NA	NA	NA	0	NA	NA	NA	NA	0	1.48097	NA	NA
2021-03-19 04:20:00	OP-150m	UA-100m	MC	451.591	89.323	6.23452	1.12247	0.0520058	4.6	0.003439	3.047	1.979	1.44	5.889	0.08	-1.2	84.5336	0.844692	963.863	-2.15	93.6836	0	0	NA	NA	NA	NA	0	NA	NA	NA	NA	0	1.45087	NA	NA
2021-03-19 04:20:00	OP-200m	UA-100m	MC	451.591	89.323	6.23452	1.12247	0.0520058	4.6	0.003439	3.047	1.979	1.44	5.889	0.08	-1.2	84.5336	0.844692	963.863	-2.15	93.6836	0	0	NA	NA	NA	NA	0	NA	NA	NA	NA	0	1.46872	NA	NA
2021-03-19 04:20:00	OP-50m	UA-100m	MC	451.591	89.323	6.23452	1.12247	0.0520058	4.6	0.003439	3.047	1.979	1.44	5.889	0.08	-1.2	84.5336	0.844692	963.863	-2.15	93.6836	0	0	NA	NA	NA	NA	0	NA	NA	NA	9.43249e-06	1454722	1.47188	NA	NA
2021-03-19 04:20:00	OP-UW	UA-100m	MC	451.591	89.323	6.23452	1.12247	0.0520058	4.6	0.003439	3.047	1.979	1.44	5.889	0.08	-1.2	84.5336	0.844692	963.863	-2.15	93.6836	0	0	NA	NA	NA	NA	0	NA	NA	NA	NA	0	1.45198	NA	NA
2021-03-19 04:20:00	OP-100m	UA-150m	MC	451.591	88.428	5.8634	1.12805	0.0465251	3.1	0.003309	2.69	2.436	1.643	8.07	0.08	-1.2	84.5336	0.844692	963.863	-2.15	93.6836	0	0	NA	NA	NA	NA	0	NA	NA	NA	NA	0	1.48097	NA	NA
2021-03-19 04:20:00	OP-150m	UA-150m	MC	451.591	88.428	5.8634	1.12805	0.0465251	3.1	0.003309	2.69	2.436	1.643	8.07	0.08	-1.2	84.5336	0.844692	963.863	-2.15	93.6836	0	0	NA	NA	NA	NA	0	NA	NA	NA	NA	0	1.45087	NA	NA
2021-03-19 04:20:00	OP-200m	UA-150m	MC	451.591	88.428	5.8634	1.12805	0.0465251	3.1	0.003309	2.69	2.436	1.643	8.07	0.08	-1.2	84.5336	0.844692	963.863	-2.15	93.6836	0	0	NA	NA	NA	NA	0	NA	NA	NA	NA	0	1.46872	NA	NA
2021-03-19 04:20:00	OP-50m	UA-150m	MC	451.591	88.428	5.8634	1.12805	0.0465251	3.1	0.003309	2.69	2.436	1.643	8.07	0.08	-1.2	84.5336	0.844692	963.863	-2.15	93.6836	0	0	NA	NA	NA	NA	0	NA	NA	NA	1.29485e-05	1940182	1.47188	NA	NA
2021-03-19 04:20:00	OP-UW	UA-150m	MC	451.591	88.428	5.8634	1.12805	0.0465251	3.1	0.003309	2.69	2.436	1.643	8.07	0.08	-1.2	84.5336	0.844692	963.863	-2.15	93.6836	0	0	NA	NA	NA	NA	0	NA	NA	NA	NA	0	1.45198	NA	NA
2021-03-19 04:30:00	OP-100m	UA-UW	MC	451.591	52.313	27.5934	0.953068	0.0481419	20.6	0.00118	4.924	5.202	1.515	6.62	0.2	-1.13327	67.3009	0.810617	963.8	-2.05	93.4327	0	0	NA	NA	NA	NA	0	NA	NA	NA	2.30211e-05	2878074	1.4909	NA	NA
2021-03-19 04:30:00	OP-150m	UA-UW	MC	451.591	52.313	27.5934	0.953068	0.0481419	20.6	0.00118	4.924	5.202	1.515	6.62	0.2	-1.13327	67.3009	0.810617	963.8	-2.05	93.4327	0	0	NA	NA	NA	NA	0	NA	NA	NA	2.03744e-05	2094598	1.4602	NA	NA
2021-03-19 04:30:00	OP-200m	UA-UW	MC	451.591	52.313	27.5934	0.953068	0.0481419	20.6	0.00118	4.924	5.202	1.515	6.62	0.2	-1.13327	67.3009	0.810617	963.8	-2.05	93.4327	0	0	NA	NA	NA	NA	0	NA	NA	NA	1.57847e-05	1576496	1.48108	NA	NA
2021-03-19 04:30:00	OP-50m	UA-UW	MC	451.591	52.313	27.5934	0.953068	0.0481419	20.6	0.00118	4.924	5.202	1.515	6.62	0.2	-1.13327	67.3009	0.810617	963.8	-2.05	93.4327	0	0	NA	NA	NA	NA	0	NA	NA	NA	2.44568e-05	4100719	1.48639	NA	NA
2021-03-19 04:30:00	OP-UW	UA-UW	MC	451.591	52.313	27.5934	0.953068	0.0481419	20.6	0.00118	4.924	5.202	1.515	6.62	0.2	-1.13327	67.3009	0.810617	963.8	-2.05	93.4327	0	0	NA	NA	NA	NA	0	NA	NA	NA	NA	0	1.47117	NA	NA
2021-03-19 04:30:00	OP-100m	UA-100m	MC	451.591	53.399	14.7429	1.01487	0.052496	3.8	0.01322	4.251	2.435	1.301	4.753	0.08	-1.13327	67.3009	0.810617	963.8	-2.05	93.4327	0	0	NA	NA	NA	NA	0	NA	NA	NA	2.75398e-05	4292711	1.4909	NA	NA
2021-03-19 04:30:00	OP-150m	UA-100m	MC	451.591	53.399	14.7429	1.01487	0.052496	3.8	0.01322	4.251	2.435	1.301	4.753	0.08	-1.13327	67.3009	0.810617	963.8	-2.05	93.4327	0	0	NA	NA	NA	NA	0	NA	NA	NA	2.43158e-05	3650891	1.4602	NA	NA
2021-03-19 04:30:00	OP-200m	UA-100m	MC	451.591	53.399	14.7429	1.01487	0.052496	3.8	0.01322	4.251	2.435	1.301	4.753	0.08	-1.13327	67.3009	0.810617	963.8	-2.05	93.4327	0	0	NA	NA	NA	NA	0	NA	NA	NA	2.12145e-05	3106003	1.48108	NA	NA
2021-03-19 04:30:00	OP-50m	UA-100m	MC	451.591	53.399	14.7429	1.01487	0.052496	3.8	0.01322	4.251	2.435	1.301	4.753	0.08	-1.13327	67.3009	0.810617	963.8	-2.05	93.4327	0	0	NA	NA	NA	NA	0	NA	NA	NA	2.95877e-05	5291825	1.48639	NA	NA
2021-03-19 04:30:00	OP-UW	UA-100m	MC	451.591	53.399	14.7429	1.01487	0.052496	3.8	0.01322	4.251	2.435	1.301	4.753	0.08	-1.13327	67.3009	0.810617	963.8	-2.05	93.4327	0	0	NA	NA	NA	NA	0	NA	NA	NA	NA	0	1.47117	NA	NA
2021-03-19 04:30:00	OP-100m	UA-150m	MC	451.591	49.184	17.4035	1.01975	0.0444996	4.4	0.002166	4.754	2.722	1.272	4.551	0.08	-1.13327	67.3009	0.810617	963.8	-2.05	93.4327	0	0	NA	NA	NA	NA	0	NA	NA	NA	3.00689e-05	3602747	1.4909	NA	NA
2021-03-19 04:30:00	OP-150m	UA-150m	MC	451.591	49.184	17.4035	1.01975	0.0444996	4.4	0.002166	4.754	2.722	1.272	4.551	0.08	-1.13327	67.3009	0.810617	963.8	-2.05	93.4327	0	0	NA	NA	NA	NA	0	NA	NA	NA	2.70702e-05	3141336	1.4602	NA	NA
2021-03-19 04:30:00	OP-200m	UA-150m	MC	451.591	49.184	17.4035	1.01975	0.0444996	4.4	0.002166	4.754	2.722	1.272	4.551	0.08	-1.13327	67.3009	0.810617	963.8	-2.05	93.4327	0	0	NA	NA	NA	NA	0	NA	NA	NA	2.54126e-05	2752789	1.48108	NA	NA
2021-03-19 04:30:00	OP-50m	UA-150m	MC	451.591	49.184	17.4035	1.01975	0.0444996	4.4	0.002166	4.754	2.722	1.272	4.551	0.08	-1.13327	67.3009	0.810617	963.8	-2.05	93.4327	0	0	NA	NA	NA	NA	0	NA	NA	NA	3.40729e-05	4134051	1.48639	NA	NA
2021-03-19 04:30:00	OP-UW	UA-150m	MC	451.591	49.184	17.4035	1.01975	0.0444996	4.4	0.002166	4.754	2.722	1.272	4.551	0.08	-1.13327	67.3009	0.810617	963.8	-2.05	93.4327	0	0	NA	NA	NA	NA	0	NA	NA	NA	NA	0	1.47117	NA	NA
2021-03-19 04:40:00	OP-100m	UA-UW	MC	451.591	23.279	14.5738	1.10312	0.0548674	20	0.001077	4.269	2.021	1.399	5.525	0.2	-1.27284	19.8207	0.822037	963.763	-2.22346	93.2102	0	0	NA	NA	NA	NA	0	NA	NA	NA	1.78241e-05	2619721	1.4975	NA	NA
2021-03-19 04:40:00	OP-150m	UA-UW	MC	451.591	23.279	14.5738	1.10312	0.0548674	20	0.001077	4.269	2.021	1.399	5.525	0.2	-1.27284	19.8207	0.822037	963.763	-2.22346	93.2102	0	0	NA	NA	NA	NA	0	NA	NA	NA	3.52915e-06	252692	1.46825	NA	NA
2021-03-19 04:40:00	OP-200m	UA-UW	MC	451.591	23.279	14.5738	1.10312	0.0548674	20	0.001077	4.269	2.021	1.399	5.525	0.2	-1.27284	19.8207	0.822037	963.763	-2.22346	93.2102	0	0	NA	NA	NA	NA	0	NA	NA	NA	1.60538e-07	1530	1.497	NA	NA
2021-03-19 04:40:00	OP-50m	UA-UW	MC	451.591	23.279	14.5738	1.10312	0.0548674	20	0.001077	4.269	2.021	1.399	5.525	0.2	-1.27284	19.8207	0.822037	963.763	-2.22346	93.2102	0	0	NA	NA	NA	NA	0	NA	NA	NA	2.45936e-05	4127364	1.48967	NA	NA
2021-03-19 04:40:00	OP-UW	UA-UW	MC	451.591	23.279	14.5738	1.10312	0.0548674	20	0.001077	4.269	2.021	1.399	5.525	0.2	-1.27284	19.8207	0.822037	963.763	-2.22346	93.2102	0	0	NA	NA	NA	NA	0	NA	NA	NA	NA	0	1.47113	NA	NA
2021-03-19 04:40:00	OP-100m	UA-100m	MC	451.591	11.307	23.8814	0.866274	0.0412264	3.2	0.01114	3.466	4.397	1.668	8.384	0.08	-1.27284	19.8207	0.822037	963.763	-2.22346	93.2102	0	0	NA	NA	NA	NA	0	NA	NA	NA	7.58243e-06	592638	1.4975	NA	NA
2021-03-19 04:40:00	OP-150m	UA-100m	MC	451.591	11.307	23.8814	0.866274	0.0412264	3.2	0.01114	3.466	4.397	1.668	8.384	0.08	-1.27284	19.8207	0.822037	963.763	-2.22346	93.2102	0	0	NA	NA	NA	NA	0	NA	NA	NA	1.08784e-06	16698	1.46825	NA	NA
2021-03-19 04:40:00	OP-200m	UA-100m	MC	451.591	11.307	23.8814	0.866274	0.0412264	3.2	0.01114	3.466	4.397	1.668	8.384	0.08	-1.27284	19.8207	0.822037	963.763	-2.22346	93.2102	0	0	NA	NA	NA	NA	0	NA	NA	NA	6.71149e-08	235	1.497	NA	NA
2021-03-19 04:40:00	OP-50m	UA-100m	MC	451.591	11.307	23.8814	0.866274	0.0412264	3.2	0.01114	3.466	4.397	1.668	8.384	0.08	-1.27284	19.8207	0.822037	963.763	-2.22346	93.2102	0	0	NA	NA	NA	NA	0	NA	NA	NA	2.73274e-05	5328868	1.48967	NA	NA
2021-03-19 04:40:00	OP-UW	UA-100m	MC	451.591	11.307	23.8814	0.866274	0.0412264	3.2	0.01114	3.466	4.397	1.668	8.384	0.08	-1.27284	19.8207	0.822037	963.763	-2.22346	93.2102	0	0	NA	NA	NA	NA	0	NA	NA	NA	NA	0	1.47113	NA	NA
2021-03-19 04:40:00	OP-100m	UA-150m	MC	451.591	7.421	18.794	0.940053	0.0319871	1.6	0.01031	3.395	4.109	1.789	10.056	0.08	-1.27284	19.8207	0.822037	963.763	-2.22346	93.2102	0	0	NA	NA	NA	NA	0	NA	NA	NA	8.1678e-07	16188	1.4975	NA	NA
2021-03-19 04:40:00	OP-150m	UA-150m	MC	451.591	7.421	18.794	0.940053	0.0319871	1.6	0.01031	3.395	4.109	1.789	10.056	0.08	-1.27284	19.8207	0.822037	963.763	-2.22346	93.2102	0	0	NA	NA	NA	NA	0	NA	NA	NA	NA	0	1.46825	NA	NA
2021-03-19 04:40:00	OP-200m	UA-150m	MC	451.591	7.421	18.794	0.940053	0.0319871	1.6	0.01031	3.395	4.109	1.789	10.056	0.08	-1.27284	19.8207	0.822037	963.763	-2.22346	93.2102	0	0	NA	NA	NA	NA	0	NA	NA	NA	NA	0	1.497	NA	NA
2021-03-19 04:40:00	OP-50m	UA-150m	MC	451.591	7.421	18.794	0.940053	0.0319871	1.6	0.01031	3.395	4.109	1.789	10.056	0.08	-1.27284	19.8207	0.822037	963.763	-2.22346	93.2102	0	0	NA	NA	NA	NA	0	NA	NA	NA	2.80927e-05	4528825	1.48967	NA	NA
2021-03-19 04:40:00	OP-UW	UA-150m	MC	451.591	7.421	18.794	0.940053	0.0319871	1.6	0.01031	3.395	4.109	1.789	10.056	0.08	-1.27284	19.8207	0.822037	963.763	-2.22346	93.2102	0	0	NA	NA	NA	NA	0	NA	NA	NA	NA	0	1.47113	NA	NA
2021-03-19 04:50:00	OP-100m	UA-UW	MC	451.591	30.493	10.7761	0.748989	0.0440837	5.2	0.01461	4.026	2.602	1.317	4.87	0.2	-1.39735	24.0022	0.78185	963.577	-2.35	93.25	0	0	NA	NA	NA	NA	0	NA	NA	NA	2.74483e-05	4210919	1.49586	NA	NA
2021-03-19 04:50:00	OP-150m	UA-UW	MC	451.591	30.493	10.7761	0.748989	0.0440837	5.2	0.01461	4.026	2.602	1.317	4.87	0.2	-1.39735	24.0022	0.78185	963.577	-2.35	93.25	0	0	NA	NA	NA	NA	0	NA	NA	NA	2.26019e-05	2957424	1.4657	NA	NA
2021-03-19 04:50:00	OP-200m	UA-UW	MC	451.591	30.493	10.7761	0.748989	0.0440837	5.2	0.01461	4.026	2.602	1.317	4.87	0.2	-1.39735	24.0022	0.78185	963.577	-2.35	93.25	0	0	NA	NA	NA	NA	0	NA	NA	NA	1.45356e-05	1430616	1.48984	NA	NA
2021-03-19 04:50:00	OP-50m	UA-UW	MC	451.591	30.493	10.7761	0.748989	0.0440837	5.2	0.01461	4.026	2.602	1.317	4.87	0.2	-1.39735	24.0022	0.78185	963.577	-2.35	93.25	0	0	NA	NA	NA	NA	0	NA	NA	NA	3.21195e-05	5392076	1.49742	NA	NA
2021-03-19 04:50:00	OP-UW	UA-UW	MC	451.591	30.493	10.7761	0.748989	0.0440837	5.2	0.01461	4.026	2.602	1.317	4.87	0.2	-1.39735	24.0022	0.78185	963.577	-2.35	93.25	0	0	NA	NA	NA	NA	0	NA	NA	NA	NA	0	1.48514	NA	NA
2021-03-19 04:50:00	OP-100m	UA-100m	MC	451.591	20.805	12.3439	0.711352	0.0405664	3.7	0.02766	2.992	2.165	1.53	6.776	0.08	-1.39735	24.0022	0.78185	963.577	-2.35	93.25	0	0	NA	NA	NA	NA	0	NA	NA	NA	2.16044e-05	3335368	1.49586	NA	NA
2021-03-19 04:50:00	OP-150m	UA-100m	MC	451.591	20.805	12.3439	0.711352	0.0405664	3.7	0.02766	2.992	2.165	1.53	6.776	0.08	-1.39735	24.0022	0.78185	963.577	-2.35	93.25	0	0	NA	NA	NA	NA	0	NA	NA	NA	1.50924e-06	56848	1.4657	NA	NA
2021-03-19 04:50:00	OP-200m	UA-100m	MC	451.591	20.805	12.3439	0.711352	0.0405664	3.7	0.02766	2.992	2.165	1.53	6.776	0.08	-1.39735	24.0022	0.78185	963.577	-2.35	93.25	0	0	NA	NA	NA	NA	0	NA	NA	NA	NA	0	1.48984	NA	NA
2021-03-19 04:50:00	OP-50m	UA-100m	MC	451.591	20.805	12.3439	0.711352	0.0405664	3.7	0.02766	2.992	2.165	1.53	6.776	0.08	-1.39735	24.0022	0.78185	963.577	-2.35	93.25	0	0	NA	NA	NA	NA	0	NA	NA	NA	3.67343e-05	6691840	1.49742	NA	NA
2021-03-19 04:50:00	OP-UW	UA-100m	MC	451.591	20.805	12.3439	0.711352	0.0405664	3.7	0.02766	2.992	2.165	1.53	6.776	0.08	-1.39735	24.0022	0.78185	963.577	-2.35	93.25	0	0	NA	NA	NA	NA	0	NA	NA	NA	NA	0	1.48514	NA	NA
2021-03-19 04:50:00	OP-100m	UA-150m	MC	451.591	14.622	12.1815	0.811465	0.0353925	2.8	0.008457	3.582	2.622	1.297	4.725	0.08	-1.39735	24.0022	0.78185	963.577	-2.35	93.25	0	0	NA	NA	NA	NA	0	NA	NA	NA	7.26698e-06	427053	1.49586	NA	NA
2021-03-19 04:50:00	OP-150m	UA-150m	MC	451.591	14.622	12.1815	0.811465	0.0353925	2.8	0.008457	3.582	2.622	1.297	4.725	0.08	-1.39735	24.0022	0.78185	963.577	-2.35	93.25	0	0	NA	NA	NA	NA	0	NA	NA	NA	3.46642e-07	138	1.4657	NA	NA
2021-03-19 04:50:00	OP-200m	UA-150m	MC	451.591	14.622	12.1815	0.811465	0.0353925	2.8	0.008457	3.582	2.622	1.297	4.725	0.08	-1.39735	24.0022	0.78185	963.577	-2.35	93.25	0	0	NA	NA	NA	NA	0	NA	NA	NA	NA	0	1.48984	NA	NA
2021-03-19 04:50:00	OP-50m	UA-150m	MC	451.591	14.622	12.1815	0.811465	0.0353925	2.8	0.008457	3.582	2.622	1.297	4.725	0.08	-1.39735	24.0022	0.78185	963.577	-2.35	93.25	0	0	NA	NA	NA	NA	0	NA	NA	NA	4.27182e-05	5229264	1.49742	NA	NA
2021-03-19 04:50:00	OP-UW	UA-150m	MC	451.591	14.622	12.1815	0.811465	0.0353925	2.8	0.008457	3.582	2.622	1.297	4.725	0.08	-1.39735	24.0022	0.78185	963.577	-2.35	93.25	0	0	NA	NA	NA	NA	0	NA	NA	NA	NA	0	1.48514	NA	NA
2021-03-19 05:00:00	OP-100m	UA-UW	MC	451.591	350.744	68.7747	0.449561	0.0337835	1.8	0.5088	6.903	4.987	2.042	14.407	0.2	-1.36	359.769	0.636112	963.463	-2.37346	92.8296	0	0	NA	NA	NA	NA	0	NA	NA	NA	3.18552e-07	2430	1.52587	NA	NA
2021-03-19 05:00:00	OP-150m	UA-UW	MC	451.591	350.744	68.7747	0.449561	0.0337835	1.8	0.5088	6.903	4.987	2.042	14.407	0.2	-1.36	359.769	0.636112	963.463	-2.37346	92.8296	0	0	NA	NA	NA	NA	0	NA	NA	NA	NA	0	1.49777	NA	NA
2021-03-19 05:00:00	OP-200m	UA-UW	MC	451.591	350.744	68.7747	0.449561	0.0337835	1.8	0.5088	6.903	4.987	2.042	14.407	0.2	-1.36	359.769	0.636112	963.463	-2.37346	92.8296	0	0	NA	NA	NA	NA	0	NA	NA	NA	NA	0	1.52754	NA	NA
2021-03-19 05:00:00	OP-50m	UA-UW	MC	451.591	350.744	68.7747	0.449561	0.0337835	1.8	0.5088	6.903	4.987	2.042	14.407	0.2	-1.36	359.769	0.636112	963.463	-2.37346	92.8296	0	0	NA	NA	NA	NA	0	NA	NA	NA	1.00174e-05	1046284	1.52468	NA	NA
2021-03-19 05:00:00	OP-UW	UA-UW	MC	451.591	350.744	68.7747	0.449561	0.0337835	1.8	0.5088	6.903	4.987	2.042	14.407	0.2	-1.36	359.769	0.636112	963.463	-2.37346	92.8296	0	0	NA	NA	NA	NA	0	NA	NA	NA	NA	0	1.48834	NA	NA
2021-03-19 05:00:00	OP-100m	UA-100m	MC	451.591	340.919	16.2521	0.876201	0.0378136	2.3	0.01535	4.058	3.435	1.477	6.239	0.08	-1.36	359.769	0.636112	963.463	-2.37346	92.8296	0	0	NA	NA	NA	NA	0	NA	NA	NA	NA	0	1.52587	NA	NA
2021-03-19 05:00:00	OP-150m	UA-100m	MC	451.591	340.919	16.2521	0.876201	0.0378136	2.3	0.01535	4.058	3.435	1.477	6.239	0.08	-1.36	359.769	0.636112	963.463	-2.37346	92.8296	0	0	NA	NA	NA	NA	0	NA	NA	NA	NA	0	1.49777	NA	NA
2021-03-19 05:00:00	OP-200m	UA-100m	MC	451.591	340.919	16.2521	0.876201	0.0378136	2.3	0.01535	4.058	3.435	1.477	6.239	0.08	-1.36	359.769	0.636112	963.463	-2.37346	92.8296	0	0	NA	NA	NA	NA	0	NA	NA	NA	NA	0	1.52754	NA	NA
2021-03-19 05:00:00	OP-50m	UA-100m	MC	451.591	340.919	16.2521	0.876201	0.0378136	2.3	0.01535	4.058	3.435	1.477	6.239	0.08	-1.36	359.769	0.636112	963.463	-2.37346	92.8296	0	0	NA	NA	NA	NA	0	NA	NA	NA	1.31304e-07	497	1.52468	NA	NA
2021-03-19 05:00:00	OP-UW	UA-100m	MC	451.591	340.919	16.2521	0.876201	0.0378136	2.3	0.01535	4.058	3.435	1.477	6.239	0.08	-1.36	359.769	0.636112	963.463	-2.37346	92.8296	0	0	NA	NA	NA	NA	0	NA	NA	NA	NA	0	1.48834	NA	NA
2021-03-19 05:00:00	OP-100m	UA-150m	MC	451.591	339.947	15.4274	1.01944	0.0223428	0.4	0.5992	6.383	7.121	2.469	24.73	0.08	-1.36	359.769	0.636112	963.463	-2.37346	92.8296	0	0	NA	NA	NA	NA	0	NA	NA	NA	NA	0	1.52587	NA	NA
2021-03-19 05:00:00	OP-150m	UA-150m	MC	451.591	339.947	15.4274	1.01944	0.0223428	0.4	0.5992	6.383	7.121	2.469	24.73	0.08	-1.36	359.769	0.636112	963.463	-2.37346	92.8296	0	0	NA	NA	NA	NA	0	NA	NA	NA	NA	0	1.49777	NA	NA
2021-03-19 05:00:00	OP-200m	UA-150m	MC	451.591	339.947	15.4274	1.01944	0.0223428	0.4	0.5992	6.383	7.121	2.469	24.73	0.08	-1.36	359.769	0.636112	963.463	-2.37346	92.8296	0	0	NA	NA	NA	NA	0	NA	NA	NA	NA	0	1.52754	NA	NA
2021-03-19 05:00:00	OP-50m	UA-150m	MC	451.591	339.947	15.4274	1.01944	0.0223428	0.4	0.5992	6.383	7.121	2.469	24.73	0.08	-1.36	359.769	0.636112	963.463	-2.37346	92.8296	0	0	NA	NA	NA	NA	0	NA	NA	NA	1.60725e-07	1208	1.52468	NA	NA
2021-03-19 05:00:00	OP-UW	UA-150m	MC	451.591	339.947	15.4274	1.01944	0.0223428	0.4	0.5992	6.383	7.121	2.469	24.73	0.08	-1.36	359.769	0.636112	963.463	-2.37346	92.8296	0	0	NA	NA	NA	NA	0	NA	NA	NA	NA	0	1.48834	NA	NA
2021-03-19 05:10:00	OP-100m	UA-UW	MC	451.591	2.182	14.4316	1.00571	0.0671981	13.1	0.01062	2.376	2.385	1.349	5.114	0.2	-1.64957	337.897	0.91	963.363	-2.58673	93.8978	0	0	NA	NA	NA	NA	0	NA	NA	NA	3.44725e-08	205	1.53991	NA	NA
2021-03-19 05:10:00	OP-150m	UA-UW	MC	451.591	2.182	14.4316	1.00571	0.0671981	13.1	0.01062	2.376	2.385	1.349	5.114	0.2	-1.64957	337.897	0.91	963.363	-2.58673	93.8978	0	0	NA	NA	NA	NA	0	NA	NA	NA	NA	0	1.51164	NA	NA
2021-03-19 05:10:00	OP-200m	UA-UW	MC	451.591	2.182	14.4316	1.00571	0.0671981	13.1	0.01062	2.376	2.385	1.349	5.114	0.2	-1.64957	337.897	0.91	963.363	-2.58673	93.8978	0	0	NA	NA	NA	NA	0	NA	NA	NA	NA	0	1.5316	NA	NA
2021-03-19 05:10:00	OP-50m	UA-UW	MC	451.591	2.182	14.4316	1.00571	0.0671981	13.1	0.01062	2.376	2.385	1.349	5.114	0.2	-1.64957	337.897	0.91	963.363	-2.58673	93.8978	0	0	NA	NA	NA	NA	0	NA	NA	NA	8.82067e-06	1684517	1.55251	NA	NA
2021-03-19 05:10:00	OP-UW	UA-UW	MC	451.591	2.182	14.4316	1.00571	0.0671981	13.1	0.01062	2.376	2.385	1.349	5.114	0.2	-1.64957	337.897	0.91	963.363	-2.58673	93.8978	0	0	NA	NA	NA	NA	0	NA	NA	NA	NA	0	1.54003	NA	NA
2021-03-19 05:10:00	OP-100m	UA-100m	MC	451.591	340.393	17.2007	0.924319	0.0386196	3.4	0.002778	3.215	2.891	1.6	7.554	0.08	-1.64957	337.897	0.91	963.363	-2.58673	93.8978	0	0	NA	NA	NA	NA	0	NA	NA	NA	NA	0	1.53991	NA	NA
2021-03-19 05:10:00	OP-150m	UA-100m	MC	451.591	340.393	17.2007	0.924319	0.0386196	3.4	0.002778	3.215	2.891	1.6	7.554	0.08	-1.64957	337.897	0.91	963.363	-2.58673	93.8978	0	0	NA	NA	NA	NA	0	NA	NA	NA	NA	0	1.51164	NA	NA
2021-03-19 05:10:00	OP-200m	UA-100m	MC	451.591	340.393	17.2007	0.924319	0.0386196	3.4	0.002778	3.215	2.891	1.6	7.554	0.08	-1.64957	337.897	0.91	963.363	-2.58673	93.8978	0	0	NA	NA	NA	NA	0	NA	NA	NA	NA	0	1.5316	NA	NA
2021-03-19 05:10:00	OP-50m	UA-100m	MC	451.591	340.393	17.2007	0.924319	0.0386196	3.4	0.002778	3.215	2.891	1.6	7.554	0.08	-1.64957	337.897	0.91	963.363	-2.58673	93.8978	0	0	NA	NA	NA	NA	0	NA	NA	NA	NA	0	1.55251	NA	NA
2021-03-19 05:10:00	OP-UW	UA-100m	MC	451.591	340.393	17.2007	0.924319	0.0386196	3.4	0.002778	3.215	2.891	1.6	7.554	0.08	-1.64957	337.897	0.91	963.363	-2.58673	93.8978	0	0	NA	NA	NA	NA	0	NA	NA	NA	NA	0	1.54003	NA	NA
2021-03-19 05:20:00	OP-100m	UA-UW	MC	451.591	19.084	13.3836	0.960278	0.047762	3.4	0.01084	2.937	2.449	1.492	6.386	0.2	-1.79735	11.2623	0.826729	963.263	-2.51327	94.8235	0	0	NA	NA	NA	NA	0	NA	NA	NA	1.33252e-05	2215549	1.55974	NA	NA
2021-03-19 05:20:00	OP-150m	UA-UW	MC	451.591	19.084	13.3836	0.960278	0.047762	3.4	0.01084	2.937	2.449	1.492	6.386	0.2	-1.79735	11.2623	0.826729	963.263	-2.51327	94.8235	0	0	NA	NA	NA	NA	0	NA	NA	NA	4.83238e-07	5489	1.53311	NA	NA
2021-03-19 05:20:00	OP-200m	UA-UW	MC	451.591	19.084	13.3836	0.960278	0.047762	3.4	0.01084	2.937	2.449	1.492	6.386	0.2	-1.79735	11.2623	0.826729	963.263	-2.51327	94.8235	0	0	NA	NA	NA	NA	0	NA	NA	NA	NA	0	1.55183	NA	NA
2021-03-19 05:20:00	OP-50m	UA-UW	MC	451.591	19.084	13.3836	0.960278	0.047762	3.4	0.01084	2.937	2.449	1.492	6.386	0.2	-1.79735	11.2623	0.826729	963.263	-2.51327	94.8235	0	0	NA	NA	NA	NA	0	NA	NA	NA	3.0181e-05	6170061	1.57623	NA	NA
2021-03-19 05:20:00	OP-UW	UA-UW	MC	451.591	19.084	13.3836	0.960278	0.047762	3.4	0.01084	2.937	2.449	1.492	6.386	0.2	-1.79735	11.2623	0.826729	963.263	-2.51327	94.8235	0	0	NA	NA	NA	NA	0	NA	NA	NA	NA	0	1.57494	NA	NA
2021-03-19 05:20:00	OP-100m	UA-100m	MC	451.591	28.744	23.1588	0.723801	0.0488817	3.4	0.09654	3.583	2.748	1.363	5.225	0.08	-1.79735	11.2623	0.826729	963.263	-2.51327	94.8235	0	0	NA	NA	NA	NA	0	NA	NA	NA	2.61615e-05	5174993	1.55974	NA	NA
2021-03-19 05:20:00	OP-150m	UA-100m	MC	451.591	28.744	23.1588	0.723801	0.0488817	3.4	0.09654	3.583	2.748	1.363	5.225	0.08	-1.79735	11.2623	0.826729	963.263	-2.51327	94.8235	0	0	NA	NA	NA	NA	0	NA	NA	NA	1.89769e-05	3045487	1.53311	NA	NA
2021-03-19 05:20:00	OP-200m	UA-100m	MC	451.591	28.744	23.1588	0.723801	0.0488817	3.4	0.09654	3.583	2.748	1.363	5.225	0.08	-1.79735	11.2623	0.826729	963.263	-2.51327	94.8235	0	0	NA	NA	NA	NA	0	NA	NA	NA	9.56819e-06	1078062	1.55183	NA	NA
2021-03-19 05:20:00	OP-50m	UA-100m	MC	451.591	28.744	23.1588	0.723801	0.0488817	3.4	0.09654	3.583	2.748	1.363	5.225	0.08	-1.79735	11.2623	0.826729	963.263	-2.51327	94.8235	0	0	NA	NA	NA	NA	0	NA	NA	NA	3.39e-05	7140795	1.57623	NA	NA
2021-03-19 05:20:00	OP-UW	UA-100m	MC	451.591	28.744	23.1588	0.723801	0.0488817	3.4	0.09654	3.583	2.748	1.363	5.225	0.08	-1.79735	11.2623	0.826729	963.263	-2.51327	94.8235	0	0	NA	NA	NA	NA	0	NA	NA	NA	NA	0	1.57494	NA	NA
2021-03-19 05:20:00	OP-100m	UA-150m	MC	451.591	30.563	22.9392	0.662377	0.0405172	2.7	0.1037	3.733	3.16	1.363	5.225	0.08	-1.79735	11.2623	0.826729	963.263	-2.51327	94.8235	0	0	NA	NA	NA	NA	0	NA	NA	NA	3.43691e-05	5442028	1.55974	NA	NA
2021-03-19 05:20:00	OP-150m	UA-150m	MC	451.591	30.563	22.9392	0.662377	0.0405172	2.7	0.1037	3.733	3.16	1.363	5.225	0.08	-1.79735	11.2623	0.826729	963.263	-2.51327	94.8235	0	0	NA	NA	NA	NA	0	NA	NA	NA	2.83278e-05	3726736	1.53311	NA	NA
2021-03-19 05:20:00	OP-200m	UA-150m	MC	451.591	30.563	22.9392	0.662377	0.0405172	2.7	0.1037	3.733	3.16	1.363	5.225	0.08	-1.79735	11.2623	0.826729	963.263	-2.51327	94.8235	0	0	NA	NA	NA	NA	0	NA	NA	NA	1.72154e-05	1922484	1.55183	NA	NA
2021-03-19 05:20:00	OP-50m	UA-150m	MC	451.591	30.563	22.9392	0.662377	0.0405172	2.7	0.1037	3.733	3.16	1.363	5.225	0.08	-1.79735	11.2623	0.826729	963.263	-2.51327	94.8235	0	0	NA	NA	NA	NA	0	NA	NA	NA	3.72418e-05	7278411	1.57623	NA	NA
2021-03-19 05:20:00	OP-UW	UA-150m	MC	451.591	30.563	22.9392	0.662377	0.0405172	2.7	0.1037	3.733	3.16	1.363	5.225	0.08	-1.79735	11.2623	0.826729	963.263	-2.51327	94.8235	0	0	NA	NA	NA	NA	0	NA	NA	NA	NA	0	1.57494	NA	NA
2021-03-19 05:30:00	OP-100m	UA-UW	MC	451.591	39.013	7.51922	0.871922	0.0382358	3.1	0.004963	3.609	2.67	1.54	6.883	0.2	-1.90346	50.3309	0.653085	963.237	-2.62346	94.8235	0	0	NA	NA	NA	NA	0	NA	NA	NA	3.20867e-05	4505082	1.57349	NA	NA
2021-03-19 05:30:00	OP-150m	UA-UW	MC	451.591	39.013	7.51922	0.871922	0.0382358	3.1	0.004963	3.609	2.67	1.54	6.883	0.2	-1.90346	50.3309	0.653085	963.237	-2.62346	94.8235	0	0	NA	NA	NA	NA	0	NA	NA	NA	3.06749e-05	3881044	1.54518	NA	NA
2021-03-19 05:30:00	OP-200m	UA-UW	MC	451.591	39.013	7.51922	0.871922	0.0382358	3.1	0.004963	3.609	2.67	1.54	6.883	0.2	-1.90346	50.3309	0.653085	963.237	-2.62346	94.8235	0	0	NA	NA	NA	NA	0	NA	NA	NA	2.85295e-05	3455297	1.55566	NA	NA
2021-03-19 05:30:00	OP-50m	UA-UW	MC	451.591	39.013	7.51922	0.871922	0.0382358	3.1	0.004963	3.609	2.67	1.54	6.883	0.2	-1.90346	50.3309	0.653085	963.237	-2.62346	94.8235	0	0	NA	NA	NA	NA	0	NA	NA	NA	3.23495e-05	5217838	1.58137	NA	NA
2021-03-19 05:30:00	OP-UW	UA-UW	MC	451.591	39.013	7.51922	0.871922	0.0382358	3.1	0.004963	3.609	2.67	1.54	6.883	0.2	-1.90346	50.3309	0.653085	963.237	-2.62346	94.8235	0	0	NA	NA	NA	NA	0	NA	NA	NA	NA	0	1.53185	NA	NA
2021-03-19 05:30:00	OP-100m	UA-150m	MC	451.591	71.141	14.0168	0.604966	0.0229366	1.1	0.2162	3.794	4.53	2.138	16.385	0.08	-1.90346	50.3309	0.653085	963.237	-2.62346	94.8235	0	0	NA	NA	NA	NA	0	NA	NA	NA	2.95436e-05	4074306	1.57349	NA	NA
2021-03-19 05:30:00	OP-150m	UA-150m	MC	451.591	71.141	14.0168	0.604966	0.0229366	1.1	0.2162	3.794	4.53	2.138	16.385	0.08	-1.90346	50.3309	0.653085	963.237	-2.62346	94.8235	0	0	NA	NA	NA	NA	0	NA	NA	NA	4.33408e-06	179684	1.54518	NA	NA
2021-03-19 05:30:00	OP-200m	UA-150m	MC	451.591	71.141	14.0168	0.604966	0.0229366	1.1	0.2162	3.794	4.53	2.138	16.385	0.08	-1.90346	50.3309	0.653085	963.237	-2.62346	94.8235	0	0	NA	NA	NA	NA	0	NA	NA	NA	1.3352e-07	892	1.55566	NA	NA
2021-03-19 05:30:00	OP-50m	UA-150m	MC	451.591	71.141	14.0168	0.604966	0.0229366	1.1	0.2162	3.794	4.53	2.138	16.385	0.08	-1.90346	50.3309	0.653085	963.237	-2.62346	94.8235	0	0	NA	NA	NA	NA	0	NA	NA	NA	5.52211e-05	10794580	1.58137	NA	NA
2021-03-19 05:30:00	OP-UW	UA-150m	MC	451.591	71.141	14.0168	0.604966	0.0229366	1.1	0.2162	3.794	4.53	2.138	16.385	0.08	-1.90346	50.3309	0.653085	963.237	-2.62346	94.8235	0	0	NA	NA	NA	NA	0	NA	NA	NA	NA	0	1.53185	NA	NA
2021-03-19 05:40:00	OP-100m	UA-UW	MC	451.591	47.836	7.25475	1.10615	0.0825567	10.4	0.02402	2.633	1.62	1.079	3.493	0.2	-1.85185	53.2531	0.827718	963.3	-2.57654	94.7796	0	0	NA	NA	NA	NA	0	NA	NA	NA	1.75065e-05	3409490	1.52954	NA	NA
2021-03-19 05:40:00	OP-150m	UA-UW	MC	451.591	47.836	7.25475	1.10615	0.0825567	10.4	0.02402	2.633	1.62	1.079	3.493	0.2	-1.85185	53.2531	0.827718	963.3	-2.57654	94.7796	0	0	NA	NA	NA	NA	0	NA	NA	NA	1.53237e-05	2757766	1.51257	NA	NA
2021-03-19 05:40:00	OP-200m	UA-UW	MC	451.591	47.836	7.25475	1.10615	0.0825567	10.4	0.02402	2.633	1.62	1.079	3.493	0.2	-1.85185	53.2531	0.827718	963.3	-2.57654	94.7796	0	0	NA	NA	NA	NA	0	NA	NA	NA	1.33327e-05	2290245	1.5312	NA	NA
2021-03-19 05:40:00	OP-50m	UA-UW	MC	451.591	47.836	7.25475	1.10615	0.0825567	10.4	0.02402	2.633	1.62	1.079	3.493	0.2	-1.85185	53.2531	0.827718	963.3	-2.57654	94.7796	0	0	NA	NA	NA	NA	0	NA	NA	NA	2.06323e-05	4645039	1.54638	NA	NA
2021-03-19 05:40:00	OP-UW	UA-UW	MC	451.591	47.836	7.25475	1.10615	0.0825567	10.4	0.02402	2.633	1.62	1.079	3.493	0.2	-1.85185	53.2531	0.827718	963.3	-2.57654	94.7796	0	0	NA	NA	NA	NA	0	NA	NA	NA	NA	0	1.52527	NA	NA
2021-03-19 05:40:00	OP-100m	UA-100m	MC	451.591	46.805	11.8807	1.1156	0.104377	9.7	0.08013	3.892	1.926	1.223	4.235	0.08	-1.85185	53.2531	0.827718	963.3	-2.57654	94.7796	0	0	NA	NA	NA	NA	0	NA	NA	NA	1.20375e-05	3848821	1.52954	NA	NA
2021-03-19 05:40:00	OP-150m	UA-100m	MC	451.591	46.805	11.8807	1.1156	0.104377	9.7	0.08013	3.892	1.926	1.223	4.235	0.08	-1.85185	53.2531	0.827718	963.3	-2.57654	94.7796	0	0	NA	NA	NA	NA	0	NA	NA	NA	1.23831e-05	3078234	1.51257	NA	NA
2021-03-19 05:40:00	OP-200m	UA-100m	MC	451.591	46.805	11.8807	1.1156	0.104377	9.7	0.08013	3.892	1.926	1.223	4.235	0.08	-1.85185	53.2531	0.827718	963.3	-2.57654	94.7796	0	0	NA	NA	NA	NA	0	NA	NA	NA	9.35627e-06	2585900	1.5312	NA	NA
2021-03-19 05:40:00	OP-50m	UA-100m	MC	451.591	46.805	11.8807	1.1156	0.104377	9.7	0.08013	3.892	1.926	1.223	4.235	0.08	-1.85185	53.2531	0.827718	963.3	-2.57654	94.7796	0	0	NA	NA	NA	NA	0	NA	NA	NA	1.75432e-05	5509229	1.54638	NA	NA
2021-03-19 05:40:00	OP-UW	UA-100m	MC	451.591	46.805	11.8807	1.1156	0.104377	9.7	0.08013	3.892	1.926	1.223	4.235	0.08	-1.85185	53.2531	0.827718	963.3	-2.57654	94.7796	0	0	NA	NA	NA	NA	0	NA	NA	NA	NA	0	1.52527	NA	NA
2021-03-19 05:40:00	OP-100m	UA-150m	MC	451.591	52.281	9.57736	1.05436	0.0597628	2.2	0.1269	4.274	2.95	1.878	11.45	0.08	-1.85185	53.2531	0.827718	963.3	-2.57654	94.7796	0	0	NA	NA	NA	NA	0	NA	NA	NA	1.90847e-05	6747688	1.52954	NA	NA
2021-03-19 05:40:00	OP-150m	UA-150m	MC	451.591	52.281	9.57736	1.05436	0.0597628	2.2	0.1269	4.274	2.95	1.878	11.45	0.08	-1.85185	53.2531	0.827718	963.3	-2.57654	94.7796	0	0	NA	NA	NA	NA	0	NA	NA	NA	2.23602e-05	5557811	1.51257	NA	NA
2021-03-19 05:40:00	OP-200m	UA-150m	MC	451.591	52.281	9.57736	1.05436	0.0597628	2.2	0.1269	4.274	2.95	1.878	11.45	0.08	-1.85185	53.2531	0.827718	963.3	-2.57654	94.7796	0	0	NA	NA	NA	NA	0	NA	NA	NA	1.8406e-05	4716044	1.5312	NA	NA
2021-03-19 05:40:00	OP-50m	UA-150m	MC	451.591	52.281	9.57736	1.05436	0.0597628	2.2	0.1269	4.274	2.95	1.878	11.45	0.08	-1.85185	53.2531	0.827718	963.3	-2.57654	94.7796	0	0	NA	NA	NA	NA	0	NA	NA	NA	2.11872e-05	8953827	1.54638	NA	NA
2021-03-19 05:40:00	OP-UW	UA-150m	MC	451.591	52.281	9.57736	1.05436	0.0597628	2.2	0.1269	4.274	2.95	1.878	11.45	0.08	-1.85185	53.2531	0.827718	963.3	-2.57654	94.7796	0	0	NA	NA	NA	NA	0	NA	NA	NA	NA	0	1.52527	NA	NA
2021-03-19 05:50:00	OP-100m	UA-UW	MC	451.591	63.422	10.0032	1.08717	0.0524802	4.6	0.004271	3.434	3.234	1.623	7.826	0.2	-1.70796	57.5467	1.19673	963.3	-2.53673	93.746	0	0	NA	NA	NA	NA	0	NA	NA	NA	2.10686e-05	4267791	1.54803	NA	NA
2021-03-19 05:50:00	OP-150m	UA-UW	MC	451.591	63.422	10.0032	1.08717	0.0524802	4.6	0.004271	3.434	3.234	1.623	7.826	0.2	-1.70796	57.5467	1.19673	963.3	-2.53673	93.746	0	0	NA	NA	NA	NA	0	NA	NA	NA	1.44643e-05	1975145	1.53285	NA	NA
2021-03-19 05:50:00	OP-200m	UA-UW	MC	451.591	63.422	10.0032	1.08717	0.0524802	4.6	0.004271	3.434	3.234	1.623	7.826	0.2	-1.70796	57.5467	1.19673	963.3	-2.53673	93.746	0	0	NA	NA	NA	NA	0	NA	NA	NA	4.9626e-06	392944	1.54873	NA	NA
2021-03-19 05:50:00	OP-50m	UA-UW	MC	451.591	63.422	10.0032	1.08717	0.0524802	4.6	0.004271	3.434	3.234	1.623	7.826	0.2	-1.70796	57.5467	1.19673	963.3	-2.53673	93.746	0	0	NA	NA	NA	NA	0	NA	NA	NA	2.46315e-05	5559418	1.57087	NA	NA
2021-03-19 05:50:00	OP-UW	UA-UW	MC	451.591	63.422	10.0032	1.08717	0.0524802	4.6	0.004271	3.434	3.234	1.623	7.826	0.2	-1.70796	57.5467	1.19673	963.3	-2.53673	93.746	0	0	NA	NA	NA	NA	0	NA	NA	NA	NA	0	1.56682	NA	NA
2021-03-19 05:50:00	OP-100m	UA-100m	MC	451.591	61.829	10.0508	0.964363	0.0450667	1.7	0.1201	3.894	3.089	2.008	13.751	0.08	-1.70796	57.5467	1.19673	963.3	-2.53673	93.746	0	0	NA	NA	NA	NA	0	NA	NA	NA	2.37836e-05	7344059	1.54803	NA	NA
2021-03-19 05:50:00	OP-150m	UA-100m	MC	451.591	61.829	10.0508	0.964363	0.0450667	1.7	0.1201	3.894	3.089	2.008	13.751	0.08	-1.70796	57.5467	1.19673	963.3	-2.53673	93.746	0	0	NA	NA	NA	NA	0	NA	NA	NA	1.75717e-05	4536462	1.53285	NA	NA
2021-03-19 05:50:00	OP-200m	UA-100m	MC	451.591	61.829	10.0508	0.964363	0.0450667	1.7	0.1201	3.894	3.089	2.008	13.751	0.08	-1.70796	57.5467	1.19673	963.3	-2.53673	93.746	0	0	NA	NA	NA	NA	0	NA	NA	NA	5.24579e-06	861198	1.54873	NA	NA
2021-03-19 05:50:00	OP-50m	UA-100m	MC	451.591	61.829	10.0508	0.964363	0.0450667	1.7	0.1201	3.894	3.089	2.008	13.751	0.08	-1.70796	57.5467	1.19673	963.3	-2.53673	93.746	0	0	NA	NA	NA	NA	0	NA	NA	NA	2.76871e-05	9592094	1.57087	NA	NA
2021-03-19 05:50:00	OP-UW	UA-100m	MC	451.591	61.829	10.0508	0.964363	0.0450667	1.7	0.1201	3.894	3.089	2.008	13.751	0.08	-1.70796	57.5467	1.19673	963.3	-2.53673	93.746	0	0	NA	NA	NA	NA	0	NA	NA	NA	NA	0	1.56682	NA	NA
2021-03-19 05:50:00	OP-100m	UA-150m	MC	451.591	66.322	10.4441	0.946488	0.0452165	1.6	0.1774	3.513	2.81	1.751	9.503	0.08	-1.70796	57.5467	1.19673	963.3	-2.53673	93.746	0	0	NA	NA	NA	NA	0	NA	NA	NA	2.35948e-05	6379383	1.54803	NA	NA
2021-03-19 05:50:00	OP-150m	UA-150m	MC	451.591	66.322	10.4441	0.946488	0.0452165	1.6	0.1774	3.513	2.81	1.751	9.503	0.08	-1.70796	57.5467	1.19673	963.3	-2.53673	93.746	0	0	NA	NA	NA	NA	0	NA	NA	NA	7.29047e-06	1115394	1.53285	NA	NA
2021-03-19 05:50:00	OP-200m	UA-150m	MC	451.591	66.322	10.4441	0.946488	0.0452165	1.6	0.1774	3.513	2.81	1.751	9.503	0.08	-1.70796	57.5467	1.19673	963.3	-2.53673	93.746	0	0	NA	NA	NA	NA	0	NA	NA	NA	3.53619e-07	7874	1.54873	NA	NA
2021-03-19 05:50:00	OP-50m	UA-150m	MC	451.591	66.322	10.4441	0.946488	0.0452165	1.6	0.1774	3.513	2.81	1.751	9.503	0.08	-1.70796	57.5467	1.19673	963.3	-2.53673	93.746	0	0	NA	NA	NA	NA	0	NA	NA	NA	3.32489e-05	9414558	1.57087	NA	NA
2021-03-19 05:50:00	OP-UW	UA-150m	MC	451.591	66.322	10.4441	0.946488	0.0452165	1.6	0.1774	3.513	2.81	1.751	9.503	0.08	-1.70796	57.5467	1.19673	963.3	-2.53673	93.746	0	0	NA	NA	NA	NA	0	NA	NA	NA	NA	0	1.56682	NA	NA
2021-03-19 06:00:00	OP-100m	UA-UW	MC	451.591	68.562	8.59584	1.30369	0.0557567	5.3	0.001077	3.945	3.088	1.957	12.81	0.2	-1.69469	64.7311	1.41611	963.337	-2.72346	92.7296	0.0367285	0	NA	NA	NA	NA	0	NA	NA	NA	1.31265e-05	3290610	1.55459	NA	NA
2021-03-19 06:00:00	OP-150m	UA-UW	MC	451.591	68.562	8.59584	1.30369	0.0557567	5.3	0.001077	3.945	3.088	1.957	12.81	0.2	-1.69469	64.7311	1.41611	963.337	-2.72346	92.7296	0.0367285	0	NA	NA	NA	NA	0	NA	NA	NA	2.30928e-06	213266	1.54043	NA	NA
2021-03-19 06:00:00	OP-200m	UA-UW	MC	451.591	68.562	8.59584	1.30369	0.0557567	5.3	0.001077	3.945	3.088	1.957	12.81	0.2	-1.69469	64.7311	1.41611	963.337	-2.72346	92.7296	0.0367285	0	NA	NA	NA	NA	0	NA	NA	NA	2.73125e-08	332	1.54415	NA	NA
2021-03-19 06:00:00	OP-50m	UA-UW	MC	451.591	68.562	8.59584	1.30369	0.0557567	5.3	0.001077	3.945	3.088	1.957	12.81	0.2	-1.69469	64.7311	1.41611	963.337	-2.72346	92.7296	0.0367285	0	NA	NA	NA	NA	0	NA	NA	NA	1.94814e-05	5732003	1.57333	NA	NA
2021-03-19 06:00:00	OP-UW	UA-UW	MC	451.591	68.562	8.59584	1.30369	0.0557567	5.3	0.001077	3.945	3.088	1.957	12.81	0.2	-1.69469	64.7311	1.41611	963.337	-2.72346	92.7296	0.0367285	0	NA	NA	NA	NA	0	NA	NA	NA	NA	0	1.55198	NA	NA
2021-03-19 06:00:00	OP-100m	UA-100m	MC	451.591	73.516	10.3786	1.05719	0.028959	2.1	9.707e-05	3.308	3.73	1.769	9.762	0.08	-1.69469	64.7311	1.41611	963.337	-2.72346	92.7296	0.0367285	0	NA	NA	NA	NA	0	NA	NA	NA	1.36578e-05	1001654	1.55459	NA	NA
2021-03-19 06:00:00	OP-150m	UA-100m	MC	451.591	73.516	10.3786	1.05719	0.028959	2.1	9.707e-05	3.308	3.73	1.769	9.762	0.08	-1.69469	64.7311	1.41611	963.337	-2.72346	92.7296	0.0367285	0	NA	NA	NA	NA	0	NA	NA	NA	5.03066e-07	1852	1.54043	NA	NA
2021-03-19 06:00:00	OP-200m	UA-100m	MC	451.591	73.516	10.3786	1.05719	0.028959	2.1	9.707e-05	3.308	3.73	1.769	9.762	0.08	-1.69469	64.7311	1.41611	963.337	-2.72346	92.7296	0.0367285	0	NA	NA	NA	NA	0	NA	NA	NA	NA	0	1.54415	NA	NA
2021-03-19 06:00:00	OP-50m	UA-100m	MC	451.591	73.516	10.3786	1.05719	0.028959	2.1	9.707e-05	3.308	3.73	1.769	9.762	0.08	-1.69469	64.7311	1.41611	963.337	-2.72346	92.7296	0.0367285	0	NA	NA	NA	NA	0	NA	NA	NA	3.73176e-05	3664708	1.57333	NA	NA
2021-03-19 06:00:00	OP-UW	UA-100m	MC	451.591	73.516	10.3786	1.05719	0.028959	2.1	9.707e-05	3.308	3.73	1.769	9.762	0.08	-1.69469	64.7311	1.41611	963.337	-2.72346	92.7296	0.0367285	0	NA	NA	NA	NA	0	NA	NA	NA	NA	0	1.55198	NA	NA
2021-03-19 06:00:00	OP-100m	UA-150m	MC	451.591	82.87	10.5388	0.954874	0.0273742	2.1	0.0002541	3.55	4.224	1.945	12.595	0.08	-1.69469	64.7311	1.41611	963.337	-2.72346	92.7296	0.0367285	0	NA	NA	NA	NA	0	NA	NA	NA	3.29014e-06	7667	1.55459	NA	NA
2021-03-19 06:00:00	OP-150m	UA-150m	MC	451.591	82.87	10.5388	0.954874	0.0273742	2.1	0.0002541	3.55	4.224	1.945	12.595	0.08	-1.69469	64.7311	1.41611	963.337	-2.72346	92.7296	0.0367285	0	NA	NA	NA	NA	0	NA	NA	NA	NA	0	1.54043	NA	NA
2021-03-19 06:00:00	OP-200m	UA-150m	MC	451.591	82.87	10.5388	0.954874	0.0273742	2.1	0.0002541	3.55	4.224	1.945	12.595	0.08	-1.69469	64.7311	1.41611	963.337	-2.72346	92.7296	0.0367285	0	NA	NA	NA	NA	0	NA	NA	NA	NA	0	1.54415	NA	NA
2021-03-19 06:00:00	OP-50m	UA-150m	MC	451.591	82.87	10.5388	0.954874	0.0273742	2.1	0.0002541	3.55	4.224	1.945	12.595	0.08	-1.69469	64.7311	1.41611	963.337	-2.72346	92.7296	0.0367285	0	NA	NA	NA	NA	0	NA	NA	NA	3.00597e-05	3365046	1.57333	NA	NA
2021-03-19 06:00:00	OP-UW	UA-150m	MC	451.591	82.87	10.5388	0.954874	0.0273742	2.1	0.0002541	3.55	4.224	1.945	12.595	0.08	-1.69469	64.7311	1.41611	963.337	-2.72346	92.7296	0.0367285	0	NA	NA	NA	NA	0	NA	NA	NA	NA	0	1.55198	NA	NA
2021-03-19 06:10:00	OP-100m	UA-UW	MC	451.591	92.457	8.3719	1.12921	0.0475299	2	0.0203	3.062	3.441	1.726	9.154	0.2	-2.06364	87.3034	0.991666	963.4	-2.97346	93.9478	0.173457	0	NA	NA	NA	NA	0	NA	NA	NA	NA	0	1.49119	NA	NA
2021-03-19 06:10:00	OP-150m	UA-UW	MC	451.591	92.457	8.3719	1.12921	0.0475299	2	0.0203	3.062	3.441	1.726	9.154	0.2	-2.06364	87.3034	0.991666	963.4	-2.97346	93.9478	0.173457	0	NA	NA	NA	NA	0	NA	NA	NA	NA	0	1.4761	NA	NA
2021-03-19 06:10:00	OP-200m	UA-UW	MC	451.591	92.457	8.3719	1.12921	0.0475299	2	0.0203	3.062	3.441	1.726	9.154	0.2	-2.06364	87.3034	0.991666	963.4	-2.97346	93.9478	0.173457	0	NA	NA	NA	NA	0	NA	NA	NA	NA	0	1.50116	NA	NA
2021-03-19 06:10:00	OP-50m	UA-UW	MC	451.591	92.457	8.3719	1.12921	0.0475299	2	0.0203	3.062	3.441	1.726	9.154	0.2	-2.06364	87.3034	0.991666	963.4	-2.97346	93.9478	0.173457	0	NA	NA	NA	NA	0	NA	NA	NA	7.35909e-06	1050895	1.5224	NA	NA
2021-03-19 06:10:00	OP-UW	UA-UW	MC	451.591	92.457	8.3719	1.12921	0.0475299	2	0.0203	3.062	3.441	1.726	9.154	0.2	-2.06364	87.3034	0.991666	963.4	-2.97346	93.9478	0.173457	0	NA	NA	NA	NA	0	NA	NA	NA	NA	0	1.50668	NA	NA
2021-03-19 06:10:00	OP-100m	UA-100m	MC	451.591	98.721	8.01694	1.01137	0.0296524	1.4	0.003324	5.686	3.54	2.061	14.784	0.08	-2.06364	87.3034	0.991666	963.4	-2.97346	93.9478	0.173457	0	NA	NA	NA	NA	0	NA	NA	NA	NA	0	1.49119	NA	NA
2021-03-19 06:10:00	OP-150m	UA-100m	MC	451.591	98.721	8.01694	1.01137	0.0296524	1.4	0.003324	5.686	3.54	2.061	14.784	0.08	-2.06364	87.3034	0.991666	963.4	-2.97346	93.9478	0.173457	0	NA	NA	NA	NA	0	NA	NA	NA	NA	0	1.4761	NA	NA
2021-03-19 06:10:00	OP-200m	UA-100m	MC	451.591	98.721	8.01694	1.01137	0.0296524	1.4	0.003324	5.686	3.54	2.061	14.784	0.08	-2.06364	87.3034	0.991666	963.4	-2.97346	93.9478	0.173457	0	NA	NA	NA	NA	0	NA	NA	NA	NA	0	1.50116	NA	NA
2021-03-19 06:10:00	OP-50m	UA-100m	MC	451.591	98.721	8.01694	1.01137	0.0296524	1.4	0.003324	5.686	3.54	2.061	14.784	0.08	-2.06364	87.3034	0.991666	963.4	-2.97346	93.9478	0.173457	0	NA	NA	NA	NA	0	NA	NA	NA	3.98856e-07	6888	1.5224	NA	NA
2021-03-19 06:10:00	OP-UW	UA-100m	MC	451.591	98.721	8.01694	1.01137	0.0296524	1.4	0.003324	5.686	3.54	2.061	14.784	0.08	-2.06364	87.3034	0.991666	963.4	-2.97346	93.9478	0.173457	0	NA	NA	NA	NA	0	NA	NA	NA	NA	0	1.50668	NA	NA
2021-03-19 06:10:00	OP-100m	UA-150m	MC	451.591	102.81	7.16891	0.909193	0.0364043	2.1	0.01222	3.444	3.122	1.646	8.107	0.08	-2.06364	87.3034	0.991666	963.4	-2.97346	93.9478	0.173457	0	NA	NA	NA	NA	0	NA	NA	NA	NA	0	1.49119	NA	NA
2021-03-19 06:10:00	OP-150m	UA-150m	MC	451.591	102.81	7.16891	0.909193	0.0364043	2.1	0.01222	3.444	3.122	1.646	8.107	0.08	-2.06364	87.3034	0.991666	963.4	-2.97346	93.9478	0.173457	0	NA	NA	NA	NA	0	NA	NA	NA	NA	0	1.4761	NA	NA
2021-03-19 06:10:00	OP-200m	UA-150m	MC	451.591	102.81	7.16891	0.909193	0.0364043	2.1	0.01222	3.444	3.122	1.646	8.107	0.08	-2.06364	87.3034	0.991666	963.4	-2.97346	93.9478	0.173457	0	NA	NA	NA	NA	0	NA	NA	NA	NA	0	1.50116	NA	NA
2021-03-19 06:10:00	OP-50m	UA-150m	MC	451.591	102.81	7.16891	0.909193	0.0364043	2.1	0.01222	3.444	3.122	1.646	8.107	0.08	-2.06364	87.3034	0.991666	963.4	-2.97346	93.9478	0.173457	0	NA	NA	NA	NA	0	NA	NA	NA	1.82704e-07	1609	1.5224	NA	NA
2021-03-19 06:10:00	OP-UW	UA-150m	MC	451.591	102.81	7.16891	0.909193	0.0364043	2.1	0.01222	3.444	3.122	1.646	8.107	0.08	-2.06364	87.3034	0.991666	963.4	-2.97346	93.9478	0.173457	0	NA	NA	NA	NA	0	NA	NA	NA	NA	0	1.50668	NA	NA
2021-03-19 06:20:00	OP-100m	UA-UW	MC	451.591	57.58	23.4081	1.00905	0.0581698	6.5	0.008813	2.501	3.683	1.305	4.782	0.2	-2.23531	83.7264	0.770617	963.4	-3	94.5265	1.15093	0	NA	NA	NA	NA	0	NA	NA	NA	2.17352e-05	3705070	1.46647	NA	NA
2021-03-19 06:20:00	OP-150m	UA-UW	MC	451.591	57.58	23.4081	1.00905	0.0581698	6.5	0.008813	2.501	3.683	1.305	4.782	0.2	-2.23531	83.7264	0.770617	963.4	-3	94.5265	1.15093	0	NA	NA	NA	NA	0	NA	NA	NA	1.82774e-05	2664593	1.46135	NA	NA
2021-03-19 06:20:00	OP-200m	UA-UW	MC	451.591	57.58	23.4081	1.00905	0.0581698	6.5	0.008813	2.501	3.683	1.305	4.782	0.2	-2.23531	83.7264	0.770617	963.4	-3	94.5265	1.15093	0	NA	NA	NA	NA	0	NA	NA	NA	1.31903e-05	1723193	1.48208	NA	NA
2021-03-19 06:20:00	OP-50m	UA-UW	MC	451.591	57.58	23.4081	1.00905	0.0581698	6.5	0.008813	2.501	3.683	1.305	4.782	0.2	-2.23531	83.7264	0.770617	963.4	-3	94.5265	1.15093	0	NA	NA	NA	NA	0	NA	NA	NA	2.27263e-05	4910054	1.48508	NA	NA
2021-03-19 06:20:00	OP-UW	UA-UW	MC	451.591	57.58	23.4081	1.00905	0.0581698	6.5	0.008813	2.501	3.683	1.305	4.782	0.2	-2.23531	83.7264	0.770617	963.4	-3	94.5265	1.15093	0	NA	NA	NA	NA	0	NA	NA	NA	NA	0	1.4691	NA	NA
2021-03-19 06:20:00	OP-100m	UA-100m	MC	451.591	68.382	21.2489	0.844059	0.0477014	4.4	0.01756	3.561	3.771	1.449	5.972	0.08	-2.23531	83.7264	0.770617	963.4	-3	94.5265	1.15093	0	NA	NA	NA	NA	0	NA	NA	NA	1.84683e-05	3079954	1.46647	NA	NA
2021-03-19 06:20:00	OP-150m	UA-100m	MC	451.591	68.382	21.2489	0.844059	0.0477014	4.4	0.01756	3.561	3.771	1.449	5.972	0.08	-2.23531	83.7264	0.770617	963.4	-3	94.5265	1.15093	0	NA	NA	NA	NA	0	NA	NA	NA	8.58786e-06	748048	1.46135	NA	NA
2021-03-19 06:20:00	OP-200m	UA-100m	MC	451.591	68.382	21.2489	0.844059	0.0477014	4.4	0.01756	3.561	3.771	1.449	5.972	0.08	-2.23531	83.7264	0.770617	963.4	-3	94.5265	1.15093	0	NA	NA	NA	NA	0	NA	NA	NA	2.60187e-06	98814	1.48208	NA	NA
2021-03-19 06:20:00	OP-50m	UA-100m	MC	451.591	68.382	21.2489	0.844059	0.0477014	4.4	0.01756	3.561	3.771	1.449	5.972	0.08	-2.23531	83.7264	0.770617	963.4	-3	94.5265	1.15093	0	NA	NA	NA	NA	0	NA	NA	NA	2.715e-05	6052738	1.48508	NA	NA
2021-03-19 06:20:00	OP-UW	UA-100m	MC	451.591	68.382	21.2489	0.844059	0.0477014	4.4	0.01756	3.561	3.771	1.449	5.972	0.08	-2.23531	83.7264	0.770617	963.4	-3	94.5265	1.15093	0	NA	NA	NA	NA	0	NA	NA	NA	NA	0	1.4691	NA	NA
2021-03-19 06:20:00	OP-100m	UA-150m	MC	451.591	71.442	23.2429	0.817497	0.0462214	8.3	0.006051	3.485	4.496	1.605	7.612	0.08	-2.23531	83.7264	0.770617	963.4	-3	94.5265	1.15093	0	NA	NA	NA	NA	0	NA	NA	NA	1.40871e-05	1941137	1.46647	NA	NA
2021-03-19 06:20:00	OP-150m	UA-150m	MC	451.591	71.442	23.2429	0.817497	0.0462214	8.3	0.006051	3.485	4.496	1.605	7.612	0.08	-2.23531	83.7264	0.770617	963.4	-3	94.5265	1.15093	0	NA	NA	NA	NA	0	NA	NA	NA	7.07358e-06	531619	1.46135	NA	NA
2021-03-19 06:20:00	OP-200m	UA-150m	MC	451.591	71.442	23.2429	0.817497	0.0462214	8.3	0.006051	3.485	4.496	1.605	7.612	0.08	-2.23531	83.7264	0.770617	963.4	-3	94.5265	1.15093	0	NA	NA	NA	NA	0	NA	NA	NA	3.72106e-06	123573	1.48208	NA	NA
2021-03-19 06:20:00	OP-50m	UA-150m	MC	451.591	71.442	23.2429	0.817497	0.0462214	8.3	0.006051	3.485	4.496	1.605	7.612	0.08	-2.23531	83.7264	0.770617	963.4	-3	94.5265	1.15093	0	NA	NA	NA	NA	0	NA	NA	NA	2.46713e-05	5033991	1.48508	NA	NA
2021-03-19 06:20:00	OP-UW	UA-150m	MC	451.591	71.442	23.2429	0.817497	0.0462214	8.3	0.006051	3.485	4.496	1.605	7.612	0.08	-2.23531	83.7264	0.770617	963.4	-3	94.5265	1.15093	0	NA	NA	NA	NA	0	NA	NA	NA	NA	0	1.4691	NA	NA
2021-03-19 06:30:00	OP-100m	UA-UW	MC	451.591	32.711	5.54721	1.47913	0.0557204	4.3	0.0004646	2.543	2.363	1.408	5.602	0.2	-2.30611	48.6873	1.10099	963.4	-3.12346	94.1765	3.78549	0	NA	NA	NA	NA	0	NA	NA	NA	2.23573e-05	3423038	1.48073	NA	NA
2021-03-19 06:30:00	OP-150m	UA-UW	MC	451.591	32.711	5.54721	1.47913	0.0557204	4.3	0.0004646	2.543	2.363	1.408	5.602	0.2	-2.30611	48.6873	1.10099	963.4	-3.12346	94.1765	3.78549	0	NA	NA	NA	NA	0	NA	NA	NA	2.20219e-05	3052892	1.47446	NA	NA
2021-03-19 06:30:00	OP-200m	UA-UW	MC	451.591	32.711	5.54721	1.47913	0.0557204	4.3	0.0004646	2.543	2.363	1.408	5.602	0.2	-2.30611	48.6873	1.10099	963.4	-3.12346	94.1765	3.78549	0	NA	NA	NA	NA	0	NA	NA	NA	1.68396e-05	2289784	1.49043	NA	NA
2021-03-19 06:30:00	OP-50m	UA-UW	MC	451.591	32.711	5.54721	1.47913	0.0557204	4.3	0.0004646	2.543	2.363	1.408	5.602	0.2	-2.30611	48.6873	1.10099	963.4	-3.12346	94.1765	3.78549	0	NA	NA	NA	NA	0	NA	NA	NA	2.25896e-05	3638965	1.50066	NA	NA
2021-03-19 06:30:00	OP-UW	UA-UW	MC	451.591	32.711	5.54721	1.47913	0.0557204	4.3	0.0004646	2.543	2.363	1.408	5.602	0.2	-2.30611	48.6873	1.10099	963.4	-3.12346	94.1765	3.78549	0	NA	NA	NA	NA	0	NA	NA	NA	NA	0	1.49568	NA	NA
2021-03-19 06:30:00	OP-100m	UA-100m	MC	451.591	37.728	7.50797	1.35371	0.0586328	2.9	0.006947	3.387	2.804	1.886	11.582	0.08	-2.30611	48.6873	1.10099	963.4	-3.12346	94.1765	3.78549	0	NA	NA	NA	NA	0	NA	NA	NA	1.78697e-05	5291553	1.48073	NA	NA
2021-03-19 06:30:00	OP-150m	UA-100m	MC	451.591	37.728	7.50797	1.35371	0.0586328	2.9	0.006947	3.387	2.804	1.886	11.582	0.08	-2.30611	48.6873	1.10099	963.4	-3.12346	94.1765	3.78549	0	NA	NA	NA	NA	0	NA	NA	NA	1.54463e-05	4437275	1.47446	NA	NA
2021-03-19 06:30:00	OP-200m	UA-100m	MC	451.591	37.728	7.50797	1.35371	0.0586328	2.9	0.006947	3.387	2.804	1.886	11.582	0.08	-2.30611	48.6873	1.10099	963.4	-3.12346	94.1765	3.78549	0	NA	NA	NA	NA	0	NA	NA	NA	1.55649e-05	3927511	1.49043	NA	NA
2021-03-19 06:30:00	OP-50m	UA-100m	MC	451.591	37.728	7.50797	1.35371	0.0586328	2.9	0.006947	3.387	2.804	1.886	11.582	0.08	-2.30611	48.6873	1.10099	963.4	-3.12346	94.1765	3.78549	0	NA	NA	NA	NA	0	NA	NA	NA	2.15075e-05	6368767	1.50066	NA	NA
2021-03-19 06:30:00	OP-UW	UA-100m	MC	451.591	37.728	7.50797	1.35371	0.0586328	2.9	0.006947	3.387	2.804	1.886	11.582	0.08	-2.30611	48.6873	1.10099	963.4	-3.12346	94.1765	3.78549	0	NA	NA	NA	NA	0	NA	NA	NA	NA	0	1.49568	NA	NA
2021-03-19 06:30:00	OP-100m	UA-150m	MC	451.591	40.172	8.2753	1.17604	0.0736587	4.9	0.02717	2.478	1.844	1.342	5.059	0.08	-2.30611	48.6873	1.10099	963.4	-3.12346	94.1765	3.78549	0	NA	NA	NA	NA	0	NA	NA	NA	1.6828e-05	4458577	1.48073	NA	NA
2021-03-19 06:30:00	OP-150m	UA-150m	MC	451.591	40.172	8.2753	1.17604	0.0736587	4.9	0.02717	2.478	1.844	1.342	5.059	0.08	-2.30611	48.6873	1.10099	963.4	-3.12346	94.1765	3.78549	0	NA	NA	NA	NA	0	NA	NA	NA	1.50704e-05	3634145	1.47446	NA	NA
2021-03-19 06:30:00	OP-200m	UA-150m	MC	451.591	40.172	8.2753	1.17604	0.0736587	4.9	0.02717	2.478	1.844	1.342	5.059	0.08	-2.30611	48.6873	1.10099	963.4	-3.12346	94.1765	3.78549	0	NA	NA	NA	NA	0	NA	NA	NA	1.39645e-05	3096593	1.49043	NA	NA
2021-03-19 06:30:00	OP-50m	UA-150m	MC	451.591	40.172	8.2753	1.17604	0.0736587	4.9	0.02717	2.478	1.844	1.342	5.059	0.08	-2.30611	48.6873	1.10099	963.4	-3.12346	94.1765	3.78549	0	NA	NA	NA	NA	0	NA	NA	NA	1.88893e-05	5843867	1.50066	NA	NA
2021-03-19 06:30:00	OP-UW	UA-150m	MC	451.591	40.172	8.2753	1.17604	0.0736587	4.9	0.02717	2.478	1.844	1.342	5.059	0.08	-2.30611	48.6873	1.10099	963.4	-3.12346	94.1765	3.78549	0	NA	NA	NA	NA	0	NA	NA	NA	NA	0	1.49568	NA	NA
2021-03-19 06:40:00	OP-100m	UA-UW	MC	451.591	35.222	7.80468	1.67261	0.0723783	7.8	0.0006654	2.449	1.995	1.218	4.205	0.2	-2.42673	34.847	1.70302	963.437	-3.16327	94.8173	9.73827	0	NA	NA	NA	NA	0	NA	NA	NA	1.85341e-05	2996761	1.52503	NA	NA
2021-03-19 06:40:00	OP-150m	UA-UW	MC	451.591	35.222	7.80468	1.67261	0.0723783	7.8	0.0006654	2.449	1.995	1.218	4.205	0.2	-2.42673	34.847	1.70302	963.437	-3.16327	94.8173	9.73827	0	NA	NA	NA	NA	0	NA	NA	NA	1.62383e-05	2543428	1.52068	NA	NA
2021-03-19 06:40:00	OP-200m	UA-UW	MC	451.591	35.222	7.80468	1.67261	0.0723783	7.8	0.0006654	2.449	1.995	1.218	4.205	0.2	-2.42673	34.847	1.70302	963.437	-3.16327	94.8173	9.73827	0	NA	NA	NA	NA	0	NA	NA	NA	1.4646e-05	2182750	1.54139	NA	NA
2021-03-19 06:40:00	OP-50m	UA-UW	MC	451.591	35.222	7.80468	1.67261	0.0723783	7.8	0.0006654	2.449	1.995	1.218	4.205	0.2	-2.42673	34.847	1.70302	963.437	-3.16327	94.8173	9.73827	0	NA	NA	NA	NA	0	NA	NA	NA	2.1066e-05	3416407	1.54243	NA	NA
2021-03-19 06:40:00	OP-UW	UA-UW	MC	451.591	35.222	7.80468	1.67261	0.0723783	7.8	0.0006654	2.449	1.995	1.218	4.205	0.2	-2.42673	34.847	1.70302	963.437	-3.16327	94.8173	9.73827	0	NA	NA	NA	NA	0	NA	NA	NA	NA	0	1.52846	NA	NA
2021-03-19 06:40:00	OP-100m	UA-100m	MC	451.591	38.451	8.16612	1.87655	0.131183	16.5	0.01268	2.392	1.774	1.193	4.058	0.08	-2.42673	34.847	1.70302	963.437	-3.16327	94.8173	9.73827	0	NA	NA	NA	NA	0	NA	NA	NA	8.9732e-06	3164233	1.52503	NA	NA
2021-03-19 06:40:00	OP-150m	UA-100m	MC	451.591	38.451	8.16612	1.87655	0.131183	16.5	0.01268	2.392	1.774	1.193	4.058	0.08	-2.42673	34.847	1.70302	963.437	-3.16327	94.8173	9.73827	0	NA	NA	NA	NA	0	NA	NA	NA	8.3519e-06	2503899	1.52068	NA	NA
2021-03-19 06:40:00	OP-200m	UA-100m	MC	451.591	38.451	8.16612	1.87655	0.131183	16.5	0.01268	2.392	1.774	1.193	4.058	0.08	-2.42673	34.847	1.70302	963.437	-3.16327	94.8173	9.73827	0	NA	NA	NA	NA	0	NA	NA	NA	8.41025e-06	2105779	1.54139	NA	NA
2021-03-19 06:40:00	OP-50m	UA-100m	MC	451.591	38.451	8.16612	1.87655	0.131183	16.5	0.01268	2.392	1.774	1.193	4.058	0.08	-2.42673	34.847	1.70302	963.437	-3.16327	94.8173	9.73827	0	NA	NA	NA	NA	0	NA	NA	NA	1.44901e-05	4401769	1.54243	NA	NA
2021-03-19 06:40:00	OP-UW	UA-100m	MC	451.591	38.451	8.16612	1.87655	0.131183	16.5	0.01268	2.392	1.774	1.193	4.058	0.08	-2.42673	34.847	1.70302	963.437	-3.16327	94.8173	9.73827	0	NA	NA	NA	NA	0	NA	NA	NA	NA	0	1.52846	NA	NA
2021-03-19 06:40:00	OP-100m	UA-150m	MC	451.591	40.178	7.43271	1.79707	0.129366	13.7	0.01695	2.418	1.602	1.148	3.814	0.08	-2.42673	34.847	1.70302	963.437	-3.16327	94.8173	9.73827	0	NA	NA	NA	NA	0	NA	NA	NA	1.03895e-05	3260748	1.52503	NA	NA
2021-03-19 06:40:00	OP-150m	UA-150m	MC	451.591	40.178	7.43271	1.79707	0.129366	13.7	0.01695	2.418	1.602	1.148	3.814	0.08	-2.42673	34.847	1.70302	963.437	-3.16327	94.8173	9.73827	0	NA	NA	NA	NA	0	NA	NA	NA	8.84812e-06	2613788	1.52068	NA	NA
2021-03-19 06:40:00	OP-200m	UA-150m	MC	451.591	40.178	7.43271	1.79707	0.129366	13.7	0.01695	2.418	1.602	1.148	3.814	0.08	-2.42673	34.847	1.70302	963.437	-3.16327	94.8173	9.73827	0	NA	NA	NA	NA	0	NA	NA	NA	7.83947e-06	2152129	1.54139	NA	NA
2021-03-19 06:40:00	OP-50m	UA-150m	MC	451.591	40.178	7.43271	1.79707	0.129366	13.7	0.01695	2.418	1.602	1.148	3.814	0.08	-2.42673	34.847	1.70302	963.437	-3.16327	94.8173	9.73827	0	NA	NA	NA	NA	0	NA	NA	NA	1.38705e-05	4546080	1.54243	NA	NA
2021-03-19 06:40:00	OP-UW	UA-150m	MC	451.591	40.178	7.43271	1.79707	0.129366	13.7	0.01695	2.418	1.602	1.148	3.814	0.08	-2.42673	34.847	1.70302	963.437	-3.16327	94.8173	9.73827	0	NA	NA	NA	NA	0	NA	NA	NA	NA	0	1.52846	NA	NA
2021-03-19 06:50:00	OP-100m	UA-UW	MC	451.591	42.445	9.06681	1.76786	0.133882	33.5	0.01374	2.34	2.022	1.245	4.373	0.2	-2.38389	44.4694	1.82531	963.537	-3.06327	94.8827	22.6898	0	NA	NA	NA	NA	0	NA	NA	NA	8.00444e-06	2840429	1.51008	NA	NA
2021-03-19 06:50:00	OP-150m	UA-UW	MC	451.591	42.445	9.06681	1.76786	0.133882	33.5	0.01374	2.34	2.022	1.245	4.373	0.2	-2.38389	44.4694	1.82531	963.537	-3.06327	94.8827	22.6898	0	NA	NA	NA	NA	0	NA	NA	NA	7.79491e-06	2189022	1.50498	NA	NA
2021-03-19 06:50:00	OP-200m	UA-UW	MC	451.591	42.445	9.06681	1.76786	0.133882	33.5	0.01374	2.34	2.022	1.245	4.373	0.2	-2.38389	44.4694	1.82531	963.537	-3.06327	94.8827	22.6898	0	NA	NA	NA	NA	0	NA	NA	NA	6.24999e-06	1793081	1.52381	NA	NA
2021-03-19 06:50:00	OP-50m	UA-UW	MC	451.591	42.445	9.06681	1.76786	0.133882	33.5	0.01374	2.34	2.022	1.245	4.373	0.2	-2.38389	44.4694	1.82531	963.537	-3.06327	94.8827	22.6898	0	NA	NA	NA	NA	0	NA	NA	NA	1.04748e-05	4150030	1.51898	NA	NA
2021-03-19 06:50:00	OP-UW	UA-UW	MC	451.591	42.445	9.06681	1.76786	0.133882	33.5	0.01374	2.34	2.022	1.245	4.373	0.2	-2.38389	44.4694	1.82531	963.537	-3.06327	94.8827	22.6898	0	NA	NA	NA	NA	0	NA	NA	NA	NA	0	1.50918	NA	NA
2021-03-19 06:50:00	OP-100m	UA-100m	MC	451.591	40.65	7.22673	2.12398	0.131552	15.8	0.00626	2.968	1.91	1.59	7.438	0.08	-2.38389	44.4694	1.82531	963.537	-3.06327	94.8827	22.6898	0	NA	NA	NA	NA	0	NA	NA	NA	7.89923e-06	3418759	1.51008	NA	NA
2021-03-19 06:50:00	OP-150m	UA-100m	MC	451.591	40.65	7.22673	2.12398	0.131552	15.8	0.00626	2.968	1.91	1.59	7.438	0.08	-2.38389	44.4694	1.82531	963.537	-3.06327	94.8827	22.6898	0	NA	NA	NA	NA	0	NA	NA	NA	1.06911e-05	2733121	1.50498	NA	NA
2021-03-19 06:50:00	OP-200m	UA-100m	MC	451.591	40.65	7.22673	2.12398	0.131552	15.8	0.00626	2.968	1.91	1.59	7.438	0.08	-2.38389	44.4694	1.82531	963.537	-3.06327	94.8827	22.6898	0	NA	NA	NA	NA	0	NA	NA	NA	6.09398e-06	2306513	1.52381	NA	NA
2021-03-19 06:50:00	OP-50m	UA-100m	MC	451.591	40.65	7.22673	2.12398	0.131552	15.8	0.00626	2.968	1.91	1.59	7.438	0.08	-2.38389	44.4694	1.82531	963.537	-3.06327	94.8827	22.6898	0	NA	NA	NA	NA	0	NA	NA	NA	8.47891e-06	4779210	1.51898	NA	NA
2021-03-19 06:50:00	OP-UW	UA-100m	MC	451.591	40.65	7.22673	2.12398	0.131552	15.8	0.00626	2.968	1.91	1.59	7.438	0.08	-2.38389	44.4694	1.82531	963.537	-3.06327	94.8827	22.6898	0	NA	NA	NA	NA	0	NA	NA	NA	NA	0	1.50918	NA	NA
2021-03-19 06:50:00	OP-100m	UA-150m	MC	451.591	43.259	7.93329	2.01142	0.12975	12	0.009858	3.088	1.995	1.387	5.423	0.08	-2.38389	44.4694	1.82531	963.537	-3.06327	94.8827	22.6898	0	NA	NA	NA	NA	0	NA	NA	NA	9.49072e-06	3532718	1.51008	NA	NA
2021-03-19 06:50:00	OP-150m	UA-150m	MC	451.591	43.259	7.93329	2.01142	0.12975	12	0.009858	3.088	1.995	1.387	5.423	0.08	-2.38389	44.4694	1.82531	963.537	-3.06327	94.8827	22.6898	0	NA	NA	NA	NA	0	NA	NA	NA	7.30092e-06	2763451	1.50498	NA	NA
2021-03-19 06:50:00	OP-200m	UA-150m	MC	451.591	43.259	7.93329	2.01142	0.12975	12	0.009858	3.088	1.995	1.387	5.423	0.08	-2.38389	44.4694	1.82531	963.537	-3.06327	94.8827	22.6898	0	NA	NA	NA	NA	0	NA	NA	NA	7.20477e-06	2326492	1.52381	NA	NA
2021-03-19 06:50:00	OP-50m	UA-150m	MC	451.591	43.259	7.93329	2.01142	0.12975	12	0.009858	3.088	1.995	1.387	5.423	0.08	-2.38389	44.4694	1.82531	963.537	-3.06327	94.8827	22.6898	0	NA	NA	NA	NA	0	NA	NA	NA	9.80398e-06	4804912	1.51898	NA	NA
2021-03-19 06:50:00	OP-UW	UA-150m	MC	451.591	43.259	7.93329	2.01142	0.12975	12	0.009858	3.088	1.995	1.387	5.423	0.08	-2.38389	44.4694	1.82531	963.537	-3.06327	94.8827	22.6898	0	NA	NA	NA	NA	0	NA	NA	NA	NA	0	1.50918	NA	NA
2021-03-19 07:00:00	OP-100m	UA-UW	MC	451.591	36.713	7.87173	1.66994	0.122668	19.3	0.01443	2.272	1.9	1.239	4.335	0.2	-2.10982	44.4963	1.94673	963.563	-3.12346	92.4318	42.1731	0	NA	NA	NA	NA	0	NA	NA	NA	1.18313e-05	3128553	1.4894	NA	NA
2021-03-19 07:00:00	OP-150m	UA-UW	MC	451.591	36.713	7.87173	1.66994	0.122668	19.3	0.01443	2.272	1.9	1.239	4.335	0.2	-2.10982	44.4963	1.94673	963.563	-3.12346	92.4318	42.1731	0	NA	NA	NA	NA	0	NA	NA	NA	8.07912e-06	2422701	1.48105	NA	NA
2021-03-19 07:00:00	OP-200m	UA-UW	MC	451.591	36.713	7.87173	1.66994	0.122668	19.3	0.01443	2.272	1.9	1.239	4.335	0.2	-2.10982	44.4963	1.94673	963.563	-3.12346	92.4318	42.1731	0	NA	NA	NA	NA	0	NA	NA	NA	7.52461e-06	2020255	1.49324	NA	NA
2021-03-19 07:00:00	OP-50m	UA-UW	MC	451.591	36.713	7.87173	1.66994	0.122668	19.3	0.01443	2.272	1.9	1.239	4.335	0.2	-2.10982	44.4963	1.94673	963.563	-3.12346	92.4318	42.1731	0	NA	NA	NA	NA	0	NA	NA	NA	1.18798e-05	4452442	1.50034	NA	NA
2021-03-19 07:00:00	OP-UW	UA-UW	MC	451.591	36.713	7.87173	1.66994	0.122668	19.3	0.01443	2.272	1.9	1.239	4.335	0.2	-2.10982	44.4963	1.94673	963.563	-3.12346	92.4318	42.1731	0	NA	NA	NA	NA	0	NA	NA	NA	NA	0	1.50041	NA	NA
2021-03-19 07:00:00	OP-100m	UA-100m	MC	451.591	41.759	7.42873	2.44005	0.149774	22.7	0.004838	2.65	2.027	1.507	6.538	0.08	-2.10982	44.4963	1.94673	963.563	-3.12346	92.4318	42.1731	0	NA	NA	NA	NA	0	NA	NA	NA	6.41506e-06	3111811	1.4894	NA	NA
2021-03-19 07:00:00	OP-150m	UA-100m	MC	451.591	41.759	7.42873	2.44005	0.149774	22.7	0.004838	2.65	2.027	1.507	6.538	0.08	-2.10982	44.4963	1.94673	963.563	-3.12346	92.4318	42.1731	0	NA	NA	NA	NA	0	NA	NA	NA	5.64532e-06	2470624	1.48105	NA	NA
2021-03-19 07:00:00	OP-200m	UA-100m	MC	451.591	41.759	7.42873	2.44005	0.149774	22.7	0.004838	2.65	2.027	1.507	6.538	0.08	-2.10982	44.4963	1.94673	963.563	-3.12346	92.4318	42.1731	0	NA	NA	NA	NA	0	NA	NA	NA	5.25943e-06	2048060	1.49324	NA	NA
2021-03-19 07:00:00	OP-50m	UA-100m	MC	451.591	41.759	7.42873	2.44005	0.149774	22.7	0.004838	2.65	2.027	1.507	6.538	0.08	-2.10982	44.4963	1.94673	963.563	-3.12346	92.4318	42.1731	0	NA	NA	NA	NA	0	NA	NA	NA	7.68115e-06	4424640	1.50034	NA	NA
2021-03-19 07:00:00	OP-UW	UA-100m	MC	451.591	41.759	7.42873	2.44005	0.149774	22.7	0.004838	2.65	2.027	1.507	6.538	0.08	-2.10982	44.4963	1.94673	963.563	-3.12346	92.4318	42.1731	0	NA	NA	NA	NA	0	NA	NA	NA	NA	0	1.50041	NA	NA
2021-03-19 07:00:00	OP-100m	UA-150m	MC	451.591	42.807	7.4925	2.36893	0.155327	21.6	0.007559	2.458	1.839	1.377	5.339	0.08	-2.10982	44.4963	1.94673	963.563	-3.12346	92.4318	42.1731	0	NA	NA	NA	NA	0	NA	NA	0.000722281	6.71434e-06	3081253	1.4894	-0.0549002	NA
2021-03-19 07:00:00	OP-150m	UA-150m	MC	451.591	42.807	7.4925	2.36893	0.155327	21.6	0.007559	2.458	1.839	1.377	5.339	0.08	-2.10982	44.4963	1.94673	963.563	-3.12346	92.4318	42.1731	0	NA	NA	NA	NA	0	NA	NA	0.000572133	6.12706e-06	2430588	1.48105	-0.121812	NA
2021-03-19 07:00:00	OP-200m	UA-150m	MC	451.591	42.807	7.4925	2.36893	0.155327	21.6	0.007559	2.458	1.839	1.377	5.339	0.08	-2.10982	44.4963	1.94673	963.563	-3.12346	92.4318	42.1731	0	NA	NA	NA	NA	0	NA	NA	0.000478329	5.54105e-06	2034254	1.49324	-0.0540139	NA
2021-03-19 07:00:00	OP-50m	UA-150m	MC	451.591	42.807	7.4925	2.36893	0.155327	21.6	0.007559	2.458	1.839	1.377	5.339	0.08	-2.10982	44.4963	1.94673	963.563	-3.12346	92.4318	42.1731	0	NA	NA	NA	NA	0	NA	NA	0.00102513	7.98261e-06	4375003	1.50034	-0.000274401	NA
2021-03-19 07:00:00	OP-UW	UA-150m	MC	451.591	42.807	7.4925	2.36893	0.155327	21.6	0.007559	2.458	1.839	1.377	5.339	0.08	-2.10982	44.4963	1.94673	963.563	-3.12346	92.4318	42.1731	0	NA	NA	NA	NA	0	NA	NA	0	NA	0	1.50041	NA	NA
2021-03-19 07:10:00	OP-100m	UA-UW	MC	451.591	45.121	8.32703	1.78815	0.125825	42.8	0.008644	2.716	2.04	1.353	5.145	0.2	-1.94593	50.7244	1.90531	963.5	-3.2	91.1827	65.0046	0	NA	NA	NA	NA	0	NA	NA	NA	8.81974e-06	2795669	1.49547	NA	NA
2021-03-19 07:10:00	OP-150m	UA-UW	MC	451.591	45.121	8.32703	1.78815	0.125825	42.8	0.008644	2.716	2.04	1.353	5.145	0.2	-1.94593	50.7244	1.90531	963.5	-3.2	91.1827	65.0046	0	NA	NA	NA	NA	0	NA	NA	NA	7.02986e-06	2133084	1.48516	NA	NA
2021-03-19 07:10:00	OP-200m	UA-UW	MC	451.591	45.121	8.32703	1.78815	0.125825	42.8	0.008644	2.716	2.04	1.353	5.145	0.2	-1.94593	50.7244	1.90531	963.5	-3.2	91.1827	65.0046	0	NA	NA	NA	NA	0	NA	NA	NA	5.9825e-06	1758022	1.50614	NA	NA
2021-03-19 07:10:00	OP-50m	UA-UW	MC	451.591	45.121	8.32703	1.78815	0.125825	42.8	0.008644	2.716	2.04	1.353	5.145	0.2	-1.94593	50.7244	1.90531	963.5	-3.2	91.1827	65.0046	0	NA	NA	NA	NA	0	NA	NA	NA	1.08478e-05	4131091	1.50962	NA	NA
2021-03-19 07:10:00	OP-UW	UA-UW	MC	451.591	45.121	8.32703	1.78815	0.125825	42.8	0.008644	2.716	2.04	1.353	5.145	0.2	-1.94593	50.7244	1.90531	963.5	-3.2	91.1827	65.0046	0	NA	NA	NA	NA	0	NA	NA	NA	NA	0	1.49809	NA	NA
2021-03-19 07:10:00	OP-100m	UA-100m	MC	451.591	49.423	10.9805	1.46506	0.106158	13	0.01829	3.182	2.57	1.576	7.278	0.08	-1.94593	50.7244	1.90531	963.5	-3.2	91.1827	65.0046	0	NA	NA	NA	NA	0	NA	NA	NA	1.40826e-05	3702075	1.49547	NA	NA
2021-03-19 07:10:00	OP-150m	UA-100m	MC	451.591	49.423	10.9805	1.46506	0.106158	13	0.01829	3.182	2.57	1.576	7.278	0.08	-1.94593	50.7244	1.90531	963.5	-3.2	91.1827	65.0046	0	NA	NA	NA	NA	0	NA	NA	NA	8.16454e-06	2964843	1.48516	NA	NA
2021-03-19 07:10:00	OP-200m	UA-100m	MC	451.591	49.423	10.9805	1.46506	0.106158	13	0.01829	3.182	2.57	1.576	7.278	0.08	-1.94593	50.7244	1.90531	963.5	-3.2	91.1827	65.0046	0	NA	NA	NA	NA	0	NA	NA	NA	7.90704e-06	2519950	1.50614	NA	NA
2021-03-19 07:10:00	OP-50m	UA-100m	MC	451.591	49.423	10.9805	1.46506	0.106158	13	0.01829	3.182	2.57	1.576	7.278	0.08	-1.94593	50.7244	1.90531	963.5	-3.2	91.1827	65.0046	0	NA	NA	NA	NA	0	NA	NA	NA	1.14353e-05	5273626	1.50962	NA	NA
2021-03-19 07:10:00	OP-UW	UA-100m	MC	451.591	49.423	10.9805	1.46506	0.106158	13	0.01829	3.182	2.57	1.576	7.278	0.08	-1.94593	50.7244	1.90531	963.5	-3.2	91.1827	65.0046	0	NA	NA	NA	NA	0	NA	NA	NA	NA	0	1.49809	NA	NA
2021-03-19 07:10:00	OP-100m	UA-150m	MC	451.591	51.37	8.97876	1.70392	0.113924	11.3	0.01298	2.547	2.274	1.51	6.568	0.08	-1.94593	50.7244	1.90531	963.5	-3.2	91.1827	65.0046	0	NA	NA	NA	NA	0	NA	NA	NA	8.80299e-06	3751816	1.49547	NA	NA
2021-03-19 07:10:00	OP-150m	UA-150m	MC	451.591	51.37	8.97876	1.70392	0.113924	11.3	0.01298	2.547	2.274	1.51	6.568	0.08	-1.94593	50.7244	1.90531	963.5	-3.2	91.1827	65.0046	0	NA	NA	NA	NA	0	NA	NA	NA	7.71482e-06	2963534	1.48516	NA	NA
2021-03-19 07:10:00	OP-200m	UA-150m	MC	451.591	51.37	8.97876	1.70392	0.113924	11.3	0.01298	2.547	2.274	1.51	6.568	0.08	-1.94593	50.7244	1.90531	963.5	-3.2	91.1827	65.0046	0	NA	NA	NA	NA	0	NA	NA	NA	9.12988e-06	2510927	1.50614	NA	NA
2021-03-19 07:10:00	OP-50m	UA-150m	MC	451.591	51.37	8.97876	1.70392	0.113924	11.3	0.01298	2.547	2.274	1.51	6.568	0.08	-1.94593	50.7244	1.90531	963.5	-3.2	91.1827	65.0046	0	NA	NA	NA	NA	0	NA	NA	NA	1.0755e-05	5212794	1.50962	NA	NA
2021-03-19 07:10:00	OP-UW	UA-150m	MC	451.591	51.37	8.97876	1.70392	0.113924	11.3	0.01298	2.547	2.274	1.51	6.568	0.08	-1.94593	50.7244	1.90531	963.5	-3.2	91.1827	65.0046	0	NA	NA	NA	NA	0	NA	NA	NA	NA	0	1.49809	NA	NA
2021-03-19 07:20:00	OP-100m	UA-UW	MC	451.591	34.14	8.65126	1.6446	0.119965	-66.9	0.007567	2.455	2.063	1.254	4.205	0.2	-1.81062	46.6247	1.96673	963.537	-3.16327	90.4867	89.3851	0	NA	NA	NA	NA	0	NA	NA	NA	7.85453e-06	2163092	1.50208	NA	NA
2021-03-19 07:20:00	OP-150m	UA-UW	MC	451.591	34.14	8.65126	1.6446	0.119965	-66.9	0.007567	2.455	2.063	1.254	4.205	0.2	-1.81062	46.6247	1.96673	963.537	-3.16327	90.4867	89.3851	0	NA	NA	NA	NA	0	NA	NA	NA	6.71316e-06	1483506	1.48075	NA	NA
2021-03-19 07:20:00	OP-200m	UA-UW	MC	451.591	34.14	8.65126	1.6446	0.119965	-66.9	0.007567	2.455	2.063	1.254	4.205	0.2	-1.81062	46.6247	1.96673	963.537	-3.16327	90.4867	89.3851	0	NA	NA	NA	NA	0	NA	NA	NA	5.80368e-06	996342	1.5027	NA	NA
2021-03-19 07:20:00	OP-50m	UA-UW	MC	451.591	34.14	8.65126	1.6446	0.119965	-66.9	0.007567	2.455	2.063	1.254	4.205	0.2	-1.81062	46.6247	1.96673	963.537	-3.16327	90.4867	89.3851	0	NA	NA	NA	NA	0	NA	NA	NA	1.11211e-05	3446707	1.52367	NA	NA
2021-03-19 07:20:00	OP-UW	UA-UW	MC	451.591	34.14	8.65126	1.6446	0.119965	-66.9	0.007567	2.455	2.063	1.254	4.205	0.2	-1.81062	46.6247	1.96673	963.537	-3.16327	90.4867	89.3851	0	NA	NA	NA	NA	0	NA	NA	NA	NA	0	1.51943	NA	NA
2021-03-19 07:20:00	OP-100m	UA-100m	MC	451.591	39.04	9.69083	1.83414	0.139231	34.7	0.01446	2.427	2.105	1.371	5.29	0.08	-1.81062	46.6247	1.96673	963.537	-3.16327	90.4867	89.3851	0	NA	NA	NA	NA	0	NA	NA	NA	6.90769e-06	2902092	1.50208	NA	NA
2021-03-19 07:20:00	OP-150m	UA-100m	MC	451.591	39.04	9.69083	1.83414	0.139231	34.7	0.01446	2.427	2.105	1.371	5.29	0.08	-1.81062	46.6247	1.96673	963.537	-3.16327	90.4867	89.3851	0	NA	NA	NA	NA	0	NA	NA	NA	6.35121e-06	2266198	1.48075	NA	NA
2021-03-19 07:20:00	OP-200m	UA-100m	MC	451.591	39.04	9.69083	1.83414	0.139231	34.7	0.01446	2.427	2.105	1.371	5.29	0.08	-1.81062	46.6247	1.96673	963.537	-3.16327	90.4867	89.3851	0	NA	NA	NA	NA	0	NA	NA	NA	5.68837e-06	1852066	1.5027	NA	NA
2021-03-19 07:20:00	OP-50m	UA-100m	MC	451.591	39.04	9.69083	1.83414	0.139231	34.7	0.01446	2.427	2.105	1.371	5.29	0.08	-1.81062	46.6247	1.96673	963.537	-3.16327	90.4867	89.3851	0	NA	NA	NA	NA	0	NA	NA	NA	8.64847e-06	4312363	1.52367	NA	NA
2021-03-19 07:20:00	OP-UW	UA-100m	MC	451.591	39.04	9.69083	1.83414	0.139231	34.7	0.01446	2.427	2.105	1.371	5.29	0.08	-1.81062	46.6247	1.96673	963.537	-3.16327	90.4867	89.3851	0	NA	NA	NA	NA	0	NA	NA	NA	NA	0	1.51943	NA	NA
2021-03-19 07:20:00	OP-100m	UA-150m	MC	451.591	39.165	9.00687	1.87758	0.139601	24.5	0.01464	2.526	1.969	1.273	4.558	0.08	-1.81062	46.6247	1.96673	963.537	-3.16327	90.4867	89.3851	0	NA	NA	NA	NA	0	NA	NA	NA	8.85303e-06	3009746	1.50208	NA	NA
2021-03-19 07:20:00	OP-150m	UA-150m	MC	451.591	39.165	9.00687	1.87758	0.139601	24.5	0.01464	2.526	1.969	1.273	4.558	0.08	-1.81062	46.6247	1.96673	963.537	-3.16327	90.4867	89.3851	0	NA	NA	NA	NA	0	NA	NA	NA	7.19643e-06	2364002	1.48075	NA	NA
2021-03-19 07:20:00	OP-200m	UA-150m	MC	451.591	39.165	9.00687	1.87758	0.139601	24.5	0.01464	2.526	1.969	1.273	4.558	0.08	-1.81062	46.6247	1.96673	963.537	-3.16327	90.4867	89.3851	0	NA	NA	NA	NA	0	NA	NA	NA	6.29073e-06	1944855	1.5027	NA	NA
2021-03-19 07:20:00	OP-50m	UA-150m	MC	451.591	39.165	9.00687	1.87758	0.139601	24.5	0.01464	2.526	1.969	1.273	4.558	0.08	-1.81062	46.6247	1.96673	963.537	-3.16327	90.4867	89.3851	0	NA	NA	NA	NA	0	NA	NA	NA	9.05542e-06	4343734	1.52367	NA	NA
2021-03-19 07:20:00	OP-UW	UA-150m	MC	451.591	39.165	9.00687	1.87758	0.139601	24.5	0.01464	2.526	1.969	1.273	4.558	0.08	-1.81062	46.6247	1.96673	963.537	-3.16327	90.4867	89.3851	0	NA	NA	NA	NA	0	NA	NA	NA	NA	0	1.51943	NA	NA
2021-03-19 07:30:00	OP-100m	UA-UW	MC	451.591	32.842	7.86686	1.87014	0.12139	-134.1	0.004054	2.131	2.085	1.331	4.826	0.2	-1.79265	37.7529	1.99407	963.637	-3.01327	91.2102	113.097	0	NA	NA	NA	NA	0	NA	NA	NA	1.09447e-05	2254756	1.51324	NA	NA
2021-03-19 07:30:00	OP-150m	UA-UW	MC	451.591	32.842	7.86686	1.87014	0.12139	-134.1	0.004054	2.131	2.085	1.331	4.826	0.2	-1.79265	37.7529	1.99407	963.637	-3.01327	91.2102	113.097	0	NA	NA	NA	NA	0	NA	NA	NA	6.50467e-06	1574589	1.49618	NA	NA
2021-03-19 07:30:00	OP-200m	UA-UW	MC	451.591	32.842	7.86686	1.87014	0.12139	-134.1	0.004054	2.131	2.085	1.331	4.826	0.2	-1.79265	37.7529	1.99407	963.637	-3.01327	91.2102	113.097	0	NA	NA	NA	NA	0	NA	NA	NA	4.58212e-06	943726	1.51477	NA	NA
2021-03-19 07:30:00	OP-50m	UA-UW	MC	451.591	32.842	7.86686	1.87014	0.12139	-134.1	0.004054	2.131	2.085	1.331	4.826	0.2	-1.79265	37.7529	1.99407	963.637	-3.01327	91.2102	113.097	0	NA	NA	NA	NA	0	NA	NA	NA	9.55092e-06	3502284	1.53281	NA	NA
2021-03-19 07:30:00	OP-UW	UA-UW	MC	451.591	32.842	7.86686	1.87014	0.12139	-134.1	0.004054	2.131	2.085	1.331	4.826	0.2	-1.79265	37.7529	1.99407	963.637	-3.01327	91.2102	113.097	0	NA	NA	NA	NA	0	NA	NA	NA	NA	0	1.51989	NA	NA
2021-03-19 07:30:00	OP-100m	UA-100m	MC	451.591	39.025	8.20406	1.96267	0.15477	99.7	0.01459	2.625	1.742	1.221	4.223	0.08	-1.79265	37.7529	1.99407	963.637	-3.01327	91.2102	113.097	0	NA	NA	NA	NA	0	NA	NA	0.000655228	6.35122e-06	2487825	1.51324	-0.0365315	NA
2021-03-19 07:30:00	OP-150m	UA-100m	MC	451.591	39.025	8.20406	1.96267	0.15477	99.7	0.01459	2.625	1.742	1.221	4.223	0.08	-1.79265	37.7529	1.99407	963.637	-3.01327	91.2102	113.097	0	NA	NA	NA	NA	0	NA	NA	0.000494503	5.6522e-06	1872062	1.49618	-0.172656	NA
2021-03-19 07:30:00	OP-200m	UA-100m	MC	451.591	39.025	8.20406	1.96267	0.15477	99.7	0.01459	2.625	1.742	1.221	4.223	0.08	-1.79265	37.7529	1.99407	963.637	-3.01327	91.2102	113.097	0	NA	NA	NA	NA	0	NA	NA	0.000403504	5.57611e-06	1522751	1.51477	-0.0456655	NA
2021-03-19 07:30:00	OP-50m	UA-100m	MC	451.591	39.025	8.20406	1.96267	0.15477	99.7	0.01459	2.625	1.742	1.221	4.223	0.08	-1.79265	37.7529	1.99407	963.637	-3.01327	91.2102	113.097	0	NA	NA	NA	NA	0	NA	NA	0.00102996	8.33139e-06	3876019	1.53281	0.0451513	NA
2021-03-19 07:30:00	OP-UW	UA-100m	MC	451.591	39.025	8.20406	1.96267	0.15477	99.7	0.01459	2.625	1.742	1.221	4.223	0.08	-1.79265	37.7529	1.99407	963.637	-3.01327	91.2102	113.097	0	NA	NA	NA	NA	0	NA	NA	0	NA	0	1.51989	NA	NA
2021-03-19 07:30:00	OP-100m	UA-150m	MC	451.591	39.445	8.86479	2.01048	0.164369	56.7	0.01887	2.62	1.862	1.164	3.898	0.08	-1.79265	37.7529	1.99407	963.637	-3.01327	91.2102	113.097	0	NA	NA	NA	NA	0	NA	NA	0.000698219	7.25158e-06	2631275	1.51324	-0.0342821	NA
2021-03-19 07:30:00	OP-150m	UA-150m	MC	451.591	39.445	8.86479	2.01048	0.164369	56.7	0.01887	2.62	1.862	1.164	3.898	0.08	-1.79265	37.7529	1.99407	963.637	-3.01327	91.2102	113.097	0	NA	NA	NA	NA	0	NA	NA	0.00053019	5.91355e-06	2025955	1.49618	-0.161035	NA
2021-03-19 07:30:00	OP-200m	UA-150m	MC	451.591	39.445	8.86479	2.01048	0.164369	56.7	0.01887	2.62	1.862	1.164	3.898	0.08	-1.79265	37.7529	1.99407	963.637	-3.01327	91.2102	113.097	0	NA	NA	NA	NA	0	NA	NA	0.000423357	5.28784e-06	1609480	1.51477	-0.0435241	NA
2021-03-19 07:30:00	OP-50m	UA-150m	MC	451.591	39.445	8.86479	2.01048	0.164369	56.7	0.01887	2.62	1.862	1.164	3.898	0.08	-1.79265	37.7529	1.99407	963.637	-3.01327	91.2102	113.097	0	NA	NA	NA	NA	0	NA	NA	0.00103728	7.8724e-06	3980363	1.53281	0.0448327	NA
2021-03-19 07:30:00	OP-UW	UA-150m	MC	451.591	39.445	8.86479	2.01048	0.164369	56.7	0.01887	2.62	1.862	1.164	3.898	0.08	-1.79265	37.7529	1.99407	963.637	-3.01327	91.2102	113.097	0	NA	NA	NA	NA	0	NA	NA	0	NA	0	1.51989	NA	NA
2021-03-19 07:40:00	OP-100m	UA-UW	MC	451.591	34.838	9.62568	1.92337	0.156084	-82.8	0.01344	2.438	2.074	1.244	4.187	0.2	-1.64185	36.7792	2.51568	963.7	-2.96327	90.4694	136.488	0	NA	NA	NA	NA	0	NA	NA	0.000576251	5.90316e-06	2175245	1.4852	-0.0486858	NA
2021-03-19 07:40:00	OP-150m	UA-UW	MC	451.591	34.838	9.62568	1.92337	0.156084	-82.8	0.01344	2.438	2.074	1.244	4.187	0.2	-1.64185	36.7792	2.51568	963.7	-2.96327	90.4694	136.488	0	NA	NA	NA	NA	0	NA	NA	0.000394008	7.92818e-06	1480504	1.47226	-0.189472	NA
2021-03-19 07:40:00	OP-200m	UA-UW	MC	451.591	34.838	9.62568	1.92337	0.156084	-82.8	0.01344	2.438	2.074	1.244	4.187	0.2	-1.64185	36.7792	2.51568	963.7	-2.96327	90.4694	136.488	0	NA	NA	NA	NA	0	NA	NA	0.000276496	4.44752e-06	1022042	1.48967	-0.0433173	NA
2021-03-19 07:40:00	OP-50m	UA-UW	MC	451.591	34.838	9.62568	1.92337	0.156084	-82.8	0.01344	2.438	2.074	1.244	4.187	0.2	-1.64185	36.7792	2.51568	963.7	-2.96327	90.4694	136.488	0	NA	NA	NA	NA	0	NA	NA	0.000929624	7.65934e-06	3512383	1.5015	0.0329441	NA
2021-03-19 07:40:00	OP-UW	UA-UW	MC	451.591	34.838	9.62568	1.92337	0.156084	-82.8	0.01344	2.438	2.074	1.244	4.187	0.2	-1.64185	36.7792	2.51568	963.7	-2.96327	90.4694	136.488	0	NA	NA	NA	NA	0	NA	NA	0	NA	0	1.493	NA	NA
2021-03-19 07:40:00	OP-100m	UA-100m	MC	451.591	38.603	9.66958	2.44312	0.2162	246.7	0.0239	2.182	1.82	1.073	3.468	0.08	-1.64185	36.7792	2.51568	963.7	-2.96327	90.4694	136.488	0	NA	NA	NA	NA	0	NA	NA	0.000505101	9.67276e-06	2324562	1.4852	-0.0555439	NA
2021-03-19 07:40:00	OP-150m	UA-100m	MC	451.591	38.603	9.66958	2.44312	0.2162	246.7	0.0239	2.182	1.82	1.073	3.468	0.08	-1.64185	36.7792	2.51568	963.7	-2.96327	90.4694	136.488	0	NA	NA	NA	NA	0	NA	NA	0.000366434	4.22941e-06	1703548	1.47226	-0.20373	NA
2021-03-19 07:40:00	OP-200m	UA-100m	MC	451.591	38.603	9.66958	2.44312	0.2162	246.7	0.0239	2.182	1.82	1.073	3.468	0.08	-1.64185	36.7792	2.51568	963.7	-2.96327	90.4694	136.488	0	NA	NA	NA	NA	0	NA	NA	0.000293932	3.98795e-06	1349022	1.48967	-0.0407477	NA
2021-03-19 07:40:00	OP-50m	UA-100m	MC	451.591	38.603	9.66958	2.44312	0.2162	246.7	0.0239	2.182	1.82	1.073	3.468	0.08	-1.64185	36.7792	2.51568	963.7	-2.96327	90.4694	136.488	0	NA	NA	NA	NA	0	NA	NA	0.000784486	6.23597e-06	3643341	1.5015	0.0390391	NA
2021-03-19 07:40:00	OP-UW	UA-100m	MC	451.591	38.603	9.66958	2.44312	0.2162	246.7	0.0239	2.182	1.82	1.073	3.468	0.08	-1.64185	36.7792	2.51568	963.7	-2.96327	90.4694	136.488	0	NA	NA	NA	NA	0	NA	NA	0	NA	0	1.493	NA	NA
2021-03-19 07:40:00	OP-100m	UA-150m	MC	451.591	38.583	9.21243	2.49748	0.202904	136	0.01648	2.33	1.975	1.169	3.925	0.08	-1.64185	36.7792	2.51568	963.7	-2.96327	90.4694	136.488	0	NA	NA	NA	NA	0	NA	NA	0.00052054	7.26747e-06	2445657	1.4852	-0.0538965	NA
2021-03-19 07:40:00	OP-150m	UA-150m	MC	451.591	38.583	9.21243	2.49748	0.202904	136	0.01648	2.33	1.975	1.169	3.925	0.08	-1.64185	36.7792	2.51568	963.7	-2.96327	90.4694	136.488	0	NA	NA	NA	NA	0	NA	NA	0.000387	4.55577e-06	1810294	1.47226	-0.192903	NA
2021-03-19 07:40:00	OP-200m	UA-150m	MC	451.591	38.583	9.21243	2.49748	0.202904	136	0.01648	2.33	1.975	1.169	3.925	0.08	-1.64185	36.7792	2.51568	963.7	-2.96327	90.4694	136.488	0	NA	NA	NA	NA	0	NA	NA	0.000298718	3.74384e-06	1422822	1.48967	-0.0400949	NA
2021-03-19 07:40:00	OP-50m	UA-150m	MC	451.591	38.583	9.21243	2.49748	0.202904	136	0.01648	2.33	1.975	1.169	3.925	0.08	-1.64185	36.7792	2.51568	963.7	-2.96327	90.4694	136.488	0	NA	NA	NA	NA	0	NA	NA	0.000813183	6.87451e-06	3821947	1.5015	0.0376614	NA
2021-03-19 07:40:00	OP-UW	UA-150m	MC	451.591	38.583	9.21243	2.49748	0.202904	136	0.01648	2.33	1.975	1.169	3.925	0.08	-1.64185	36.7792	2.51568	963.7	-2.96327	90.4694	136.488	0	NA	NA	NA	NA	0	NA	NA	0	NA	0	1.493	NA	NA
2021-03-19 07:50:00	OP-100m	UA-UW	MC	451.591	44.977	14.5828	2.02888	0.158239	-67.8	0.01082	2.69	2.469	1.449	5.602	0.2	-1.34982	35.4281	2.60327	963.787	-2.81327	89.4725	161.469	0	NA	NA	NA	NA	0	NA	NA	0.000489651	6.60912e-06	2156908	1.48084	0.0104223	NA
2021-03-19 07:50:00	OP-150m	UA-UW	MC	451.591	44.977	14.5828	2.02888	0.158239	-67.8	0.01082	2.69	2.469	1.449	5.602	0.2	-1.34982	35.4281	2.60327	963.787	-2.81327	89.4725	161.469	0	NA	NA	NA	NA	0	NA	NA	0.000354412	4.4301e-06	1558756	1.46715	-0.124682	NA
2021-03-19 07:50:00	OP-200m	UA-UW	MC	451.591	44.977	14.5828	2.02888	0.158239	-67.8	0.01082	2.69	2.469	1.449	5.602	0.2	-1.34982	35.4281	2.60327	963.787	-2.81327	89.4725	161.469	0	NA	NA	NA	NA	0	NA	NA	0.000263143	3.67937e-06	1178899	1.48471	0.0722139	NA
2021-03-19 07:50:00	OP-50m	UA-UW	MC	451.591	44.977	14.5828	2.02888	0.158239	-67.8	0.01082	2.69	2.469	1.449	5.602	0.2	-1.34982	35.4281	2.60327	963.787	-2.81327	89.4725	161.469	0	NA	NA	NA	NA	0	NA	NA	0.000801796	6.39586e-06	3575044	1.49315	0.0616091	NA
2021-03-19 07:50:00	OP-UW	UA-UW	MC	451.591	44.977	14.5828	2.02888	0.158239	-67.8	0.01082	2.69	2.469	1.449	5.602	0.2	-1.34982	35.4281	2.60327	963.787	-2.81327	89.4725	161.469	0	NA	NA	NA	NA	0	NA	NA	0	NA	0	1.47943	NA	NA
2021-03-19 07:50:00	OP-100m	UA-100m	MC	451.591	37.685	9.26188	2.49314	0.180885	5948.4	0.008504	2.72	2.009	1.271	4.544	0.08	-1.34982	35.4281	2.60327	963.787	-2.81327	89.4725	161.469	0	NA	NA	NA	NA	0	NA	NA	0.000521396	5.41344e-06	2368847	1.48084	0.00978769	NA
2021-03-19 07:50:00	OP-150m	UA-100m	MC	451.591	37.685	9.26188	2.49314	0.180885	5948.4	0.008504	2.72	2.009	1.271	4.544	0.08	-1.34982	35.4281	2.60327	963.787	-2.81327	89.4725	161.469	0	NA	NA	NA	NA	0	NA	NA	0.000375173	4.54448e-06	1726334	1.46715	-0.117782	NA
2021-03-19 07:50:00	OP-200m	UA-100m	MC	451.591	37.685	9.26188	2.49314	0.180885	5948.4	0.008504	2.72	2.009	1.271	4.544	0.08	-1.34982	35.4281	2.60327	963.787	-2.81327	89.4725	161.469	0	NA	NA	NA	NA	0	NA	NA	0.000286569	3.90343e-06	1325337	1.48471	0.0663106	NA
2021-03-19 07:50:00	OP-50m	UA-100m	MC	451.591	37.685	9.26188	2.49314	0.180885	5948.4	0.008504	2.72	2.009	1.271	4.544	0.08	-1.34982	35.4281	2.60327	963.787	-2.81327	89.4725	161.469	0	NA	NA	NA	NA	0	NA	NA	0.000789496	6.76483e-06	3637592	1.49315	0.062569	NA
2021-03-19 07:50:00	OP-UW	UA-100m	MC	451.591	37.685	9.26188	2.49314	0.180885	5948.4	0.008504	2.72	2.009	1.271	4.544	0.08	-1.34982	35.4281	2.60327	963.787	-2.81327	89.4725	161.469	0	NA	NA	NA	NA	0	NA	NA	0	NA	0	1.47943	NA	NA
2021-03-19 07:50:00	OP-100m	UA-150m	MC	451.591	38.245	9.23187	2.5455	0.209096	256.1	0.01682	2.485	1.819	1.119	3.672	0.08	-1.34982	35.4281	2.60327	963.787	-2.81327	89.4725	161.469	0	NA	NA	NA	NA	0	NA	NA	0.000510007	5.00784e-06	2383424	1.48084	0.0100063	NA
2021-03-19 07:50:00	OP-150m	UA-150m	MC	451.591	38.245	9.23187	2.5455	0.209096	256.1	0.01682	2.485	1.819	1.119	3.672	0.08	-1.34982	35.4281	2.60327	963.787	-2.81327	89.4725	161.469	0	NA	NA	NA	NA	0	NA	NA	0.000378543	4.54728e-06	1762655	1.46715	-0.116734	NA
2021-03-19 07:50:00	OP-200m	UA-150m	MC	451.591	38.245	9.23187	2.5455	0.209096	256.1	0.01682	2.485	1.819	1.119	3.672	0.08	-1.34982	35.4281	2.60327	963.787	-2.81327	89.4725	161.469	0	NA	NA	NA	NA	0	NA	NA	0.000292398	3.91074e-06	1365183	1.48471	0.0649886	NA
2021-03-19 07:50:00	OP-50m	UA-150m	MC	451.591	38.245	9.23187	2.5455	0.209096	256.1	0.01682	2.485	1.819	1.119	3.672	0.08	-1.34982	35.4281	2.60327	963.787	-2.81327	89.4725	161.469	0	NA	NA	NA	NA	0	NA	NA	0.000796814	7.64333e-06	3695377	1.49315	0.0619944	NA
2021-03-19 07:50:00	OP-UW	UA-150m	MC	451.591	38.245	9.23187	2.5455	0.209096	256.1	0.01682	2.485	1.819	1.119	3.672	0.08	-1.34982	35.4281	2.60327	963.787	-2.81327	89.4725	161.469	0	NA	NA	NA	NA	0	NA	NA	0	NA	0	1.47943	NA	NA
2021-03-19 08:00:00	OP-100m	UA-UW	MC	451.591	49.717	9.18593	2.26571	0.162569	-100.9	0.007145	2.983	2.17	1.381	5.153	0.2	-1.11654	46.7927	2.55062	963.887	-2.67654	88.8133	186.125	0	NA	NA	NA	NA	0	NA	NA	0.000521238	5.90744e-06	2280414	1.4882	0.0550111	NA
2021-03-19 08:00:00	OP-150m	UA-UW	MC	451.591	49.717	9.18593	2.26571	0.162569	-100.9	0.007145	2.983	2.17	1.381	5.153	0.2	-1.11654	46.7927	2.55062	963.887	-2.67654	88.8133	186.125	0	NA	NA	NA	NA	0	NA	NA	0.000368054	4.68668e-06	1605702	1.47099	-0.0903875	NA
2021-03-19 08:00:00	OP-200m	UA-UW	MC	451.591	49.717	9.18593	2.26571	0.162569	-100.9	0.007145	2.983	2.17	1.381	5.153	0.2	-1.11654	46.7927	2.55062	963.887	-2.67654	88.8133	186.125	0	NA	NA	NA	NA	0	NA	NA	0.000284086	4.63861e-06	1233372	1.48674	0.082524	NA
2021-03-19 08:00:00	OP-50m	UA-UW	MC	451.591	49.717	9.18593	2.26571	0.162569	-100.9	0.007145	2.983	2.17	1.381	5.153	0.2	-1.11654	46.7927	2.55062	963.887	-2.67654	88.8133	186.125	0	NA	NA	NA	NA	0	NA	NA	0.000817521	6.982e-06	3603008	1.49879	0.0817514	NA
2021-03-19 08:00:00	OP-UW	UA-UW	MC	451.591	49.717	9.18593	2.26571	0.162569	-100.9	0.007145	2.983	2.17	1.381	5.153	0.2	-1.11654	46.7927	2.55062	963.887	-2.67654	88.8133	186.125	0	NA	NA	NA	NA	0	NA	NA	0	NA	0	1.48023	NA	NA
2021-03-19 08:00:00	OP-100m	UA-100m	MC	451.591	42.621	11.7744	2.28344	0.177041	-93.1	0.01114	2.745	2.606	1.431	5.533	0.08	-1.11654	46.7927	2.55062	963.887	-2.67654	88.8133	186.125	0	NA	NA	NA	NA	0	NA	NA	0.000459654	9.41402e-06	2233308	1.4882	0.0623814	NA
2021-03-19 08:00:00	OP-150m	UA-100m	MC	451.591	42.621	11.7744	2.28344	0.177041	-93.1	0.01114	2.745	2.606	1.431	5.533	0.08	-1.11654	46.7927	2.55062	963.887	-2.67654	88.8133	186.125	0	NA	NA	NA	NA	0	NA	NA	0.000321642	4.00409e-06	1586717	1.47099	-0.10343	NA
2021-03-19 08:00:00	OP-200m	UA-100m	MC	451.591	42.621	11.7744	2.28344	0.177041	-93.1	0.01114	2.745	2.606	1.431	5.533	0.08	-1.11654	46.7927	2.55062	963.887	-2.67654	88.8133	186.125	0	NA	NA	NA	NA	0	NA	NA	0.000252893	4.21168e-06	1236128	1.48674	0.092703	NA
2021-03-19 08:00:00	OP-50m	UA-100m	MC	451.591	42.621	11.7744	2.28344	0.177041	-93.1	0.01114	2.745	2.606	1.431	5.533	0.08	-1.11654	46.7927	2.55062	963.887	-2.67654	88.8133	186.125	0	NA	NA	NA	NA	0	NA	NA	0.000738607	7.20553e-06	3643665	1.49879	0.0904859	NA
2021-03-19 08:00:00	OP-UW	UA-100m	MC	451.591	42.621	11.7744	2.28344	0.177041	-93.1	0.01114	2.745	2.606	1.431	5.533	0.08	-1.11654	46.7927	2.55062	963.887	-2.67654	88.8133	186.125	0	NA	NA	NA	NA	0	NA	NA	0	NA	0	1.48023	NA	NA
2021-03-19 08:00:00	OP-100m	UA-150m	MC	451.591	44.298	10.3304	2.40338	0.203477	-312	0.01822	2.413	2.116	1.17	3.887	0.08	-1.11654	46.7927	2.55062	963.887	-2.67654	88.8133	186.125	0	NA	NA	NA	NA	0	NA	NA	0.000482883	4.8654e-06	2281530	1.4882	0.0593805	NA
2021-03-19 08:00:00	OP-150m	UA-150m	MC	451.591	44.298	10.3304	2.40338	0.203477	-312	0.01822	2.413	2.116	1.17	3.887	0.08	-1.11654	46.7927	2.55062	963.887	-2.67654	88.8133	186.125	0	NA	NA	NA	NA	0	NA	NA	0.000349232	4.2313e-06	1635131	1.47099	-0.095259	NA
2021-03-19 08:00:00	OP-200m	UA-150m	MC	451.591	44.298	10.3304	2.40338	0.203477	-312	0.01822	2.413	2.116	1.17	3.887	0.08	-1.11654	46.7927	2.55062	963.887	-2.67654	88.8133	186.125	0	NA	NA	NA	NA	0	NA	NA	0.000269981	3.78378e-06	1269413	1.48674	0.0868355	NA
2021-03-19 08:00:00	OP-50m	UA-150m	MC	451.591	44.298	10.3304	2.40338	0.203477	-312	0.01822	2.413	2.116	1.17	3.887	0.08	-1.11654	46.7927	2.55062	963.887	-2.67654	88.8133	186.125	0	NA	NA	NA	NA	0	NA	NA	0.000773285	6.14872e-06	3660060	1.49879	0.086428	NA
2021-03-19 08:00:00	OP-UW	UA-150m	MC	451.591	44.298	10.3304	2.40338	0.203477	-312	0.01822	2.413	2.116	1.17	3.887	0.08	-1.11654	46.7927	2.55062	963.887	-2.67654	88.8133	186.125	0	NA	NA	NA	NA	0	NA	NA	0	NA	0	1.48023	NA	NA
2021-03-19 08:10:00	OP-100m	UA-UW	MC	451.591	46.567	12.4024	1.89787	0.149232	-29.7	0.01013	3.025	2.798	1.326	4.379	0.2	-0.93389	47.2961	2.43389	963.937	-2.56327	88.75	210.018	0	NA	NA	NA	NA	0	NA	NA	NA	5.86158e-06	1985310	1.4922	NA	NA
2021-03-19 08:10:00	OP-150m	UA-UW	MC	451.591	46.567	12.4024	1.89787	0.149232	-29.7	0.01013	3.025	2.798	1.326	4.379	0.2	-0.93389	47.2961	2.43389	963.937	-2.56327	88.75	210.018	0	NA	NA	NA	NA	0	NA	NA	NA	5.09353e-06	1354658	1.47152	NA	NA
2021-03-19 08:10:00	OP-200m	UA-UW	MC	451.591	46.567	12.4024	1.89787	0.149232	-29.7	0.01013	3.025	2.798	1.326	4.379	0.2	-0.93389	47.2961	2.43389	963.937	-2.56327	88.75	210.018	0	NA	NA	NA	NA	0	NA	NA	NA	4.56667e-06	989940	1.49115	NA	NA
2021-03-19 08:10:00	OP-50m	UA-UW	MC	451.591	46.567	12.4024	1.89787	0.149232	-29.7	0.01013	3.025	2.798	1.326	4.379	0.2	-0.93389	47.2961	2.43389	963.937	-2.56327	88.75	210.018	0	NA	NA	NA	NA	0	NA	NA	NA	7.79438e-06	3316993	1.5	NA	NA
2021-03-19 08:10:00	OP-UW	UA-UW	MC	451.591	46.567	12.4024	1.89787	0.149232	-29.7	0.01013	3.025	2.798	1.326	4.379	0.2	-0.93389	47.2961	2.43389	963.937	-2.56327	88.75	210.018	0	NA	NA	NA	NA	0	NA	NA	NA	NA	0	1.48684	NA	NA
2021-03-19 08:10:00	OP-100m	UA-100m	MC	451.591	37.89	8.56646	2.24744	0.15146	-48.9	0.004841	2.899	1.998	1.346	4.696	0.08	-0.93389	47.2961	2.43389	963.937	-2.56327	88.75	210.018	0	NA	NA	NA	NA	0	NA	NA	0.00055572	6.2943e-06	2168870	1.4922	0.0347399	NA
2021-03-19 08:10:00	OP-150m	UA-100m	MC	451.591	37.89	8.56646	2.24744	0.15146	-48.9	0.004841	2.899	1.998	1.346	4.696	0.08	-0.93389	47.2961	2.43389	963.937	-2.56327	88.75	210.018	0	NA	NA	NA	NA	0	NA	NA	0.000392218	6.37454e-06	1532767	1.47152	-0.140581	NA
2021-03-19 08:10:00	OP-200m	UA-100m	MC	451.591	37.89	8.56646	2.24744	0.15146	-48.9	0.004841	2.899	1.998	1.346	4.696	0.08	-0.93389	47.2961	2.43389	963.937	-2.56327	88.75	210.018	0	NA	NA	NA	NA	0	NA	NA	0.000296467	4.36153e-06	1172831	1.49115	0.0524401	NA
2021-03-19 08:10:00	OP-50m	UA-100m	MC	451.591	37.89	8.56646	2.24744	0.15146	-48.9	0.004841	2.899	1.998	1.346	4.696	0.08	-0.93389	47.2961	2.43389	963.937	-2.56327	88.75	210.018	0	NA	NA	NA	NA	0	NA	NA	0.000886879	8.04541e-06	3458249	1.5	0.0534245	NA
2021-03-19 08:10:00	OP-UW	UA-100m	MC	451.591	37.89	8.56646	2.24744	0.15146	-48.9	0.004841	2.899	1.998	1.346	4.696	0.08	-0.93389	47.2961	2.43389	963.937	-2.56327	88.75	210.018	0	NA	NA	NA	NA	0	NA	NA	0	NA	0	1.48684	NA	NA
2021-03-19 08:10:00	OP-100m	UA-150m	MC	451.591	40.73	9.31155	2.25192	0.182433	-87.1	0.01387	2.21	1.829	1.089	3.431	0.08	-0.93389	47.2961	2.43389	963.937	-2.56327	88.75	210.018	0	NA	NA	NA	NA	0	NA	NA	0.000562543	5.76426e-06	2174260	1.4922	0.0343185	NA
2021-03-19 08:10:00	OP-150m	UA-150m	MC	451.591	40.73	9.31155	2.25192	0.182433	-87.1	0.01387	2.21	1.829	1.089	3.431	0.08	-0.93389	47.2961	2.43389	963.937	-2.56327	88.75	210.018	0	NA	NA	NA	NA	0	NA	NA	0.000416652	5.9839e-06	1583042	1.47152	-0.132337	NA
2021-03-19 08:10:00	OP-200m	UA-150m	MC	451.591	40.73	9.31155	2.25192	0.182433	-87.1	0.01387	2.21	1.829	1.089	3.431	0.08	-0.93389	47.2961	2.43389	963.937	-2.56327	88.75	210.018	0	NA	NA	NA	NA	0	NA	NA	0.000302575	4.32313e-06	1184646	1.49115	0.0513815	NA
2021-03-19 08:10:00	OP-50m	UA-150m	MC	451.591	40.73	9.31155	2.25192	0.182433	-87.1	0.01387	2.21	1.829	1.089	3.431	0.08	-0.93389	47.2961	2.43389	963.937	-2.56327	88.75	210.018	0	NA	NA	NA	NA	0	NA	NA	0.00088499	7.29226e-06	3440971	1.5	0.0535385	NA
2021-03-19 08:10:00	OP-UW	UA-150m	MC	451.591	40.73	9.31155	2.25192	0.182433	-87.1	0.01387	2.21	1.829	1.089	3.431	0.08	-0.93389	47.2961	2.43389	963.937	-2.56327	88.75	210.018	0	NA	NA	NA	NA	0	NA	NA	0	NA	0	1.48684	NA	NA
2021-03-19 08:20:00	OP-100m	UA-UW	MC	451.591	38.675	12.2897	2.03409	0.174736	-33.4	0.01592	2.434	2.534	1.331	4.464	0.2	-0.697162	41.2868	2.29469	964.123	-2.41327	87.9725	232.964	0	NA	NA	NA	NA	0	NA	NA	0.000449392	4.95183e-06	1971110	1.4854	-0.0452696	NA
2021-03-19 08:20:00	OP-150m	UA-UW	MC	451.591	38.675	12.2897	2.03409	0.174736	-33.4	0.01592	2.434	2.534	1.331	4.464	0.2	-0.697162	41.2868	2.29469	964.123	-2.41327	87.9725	232.964	0	NA	NA	NA	NA	0	NA	NA	0.000315355	4.49405e-06	1370182	1.46289	-0.321437	NA
2021-03-19 08:20:00	OP-200m	UA-UW	MC	451.591	38.675	12.2897	2.03409	0.174736	-33.4	0.01592	2.434	2.534	1.331	4.464	0.2	-0.697162	41.2868	2.29469	964.123	-2.41327	87.9725	232.964	0	NA	NA	NA	NA	0	NA	NA	0.000210601	3.18269e-06	938884	1.48849	-0.0437876	NA
2021-03-19 08:20:00	OP-50m	UA-UW	MC	451.591	38.675	12.2897	2.03409	0.174736	-33.4	0.01592	2.434	2.534	1.331	4.464	0.2	-0.697162	41.2868	2.29469	964.123	-2.41327	87.9725	232.964	0	NA	NA	NA	NA	0	NA	NA	0.000775406	8.93312e-06	3360645	1.49786	0.0316091	NA
2021-03-19 08:20:00	OP-UW	UA-UW	MC	451.591	38.675	12.2897	2.03409	0.174736	-33.4	0.01592	2.434	2.534	1.331	4.464	0.2	-0.697162	41.2868	2.29469	964.123	-2.41327	87.9725	232.964	0	NA	NA	NA	NA	0	NA	NA	0	NA	0	1.49105	NA	NA
2021-03-19 08:20:00	OP-100m	UA-100m	MC	451.591	36.23	9.76821	2.12453	0.198568	-60.5	0.02591	2.339	1.752	1.07	3.32	0.08	-0.697162	41.2868	2.29469	964.123	-2.41327	87.9725	232.964	0	NA	NA	NA	NA	0	NA	NA	0.000507041	5.46415e-06	2075641	1.4854	-0.0401226	NA
2021-03-19 08:20:00	OP-150m	UA-100m	MC	451.591	36.23	9.76821	2.12453	0.198568	-60.5	0.02591	2.339	1.752	1.07	3.32	0.08	-0.697162	41.2868	2.29469	964.123	-2.41327	87.9725	232.964	0	NA	NA	NA	NA	0	NA	NA	0.00035098	4.37433e-06	1448555	1.46289	-0.288811	NA
2021-03-19 08:20:00	OP-200m	UA-100m	MC	451.591	36.23	9.76821	2.12453	0.198568	-60.5	0.02591	2.339	1.752	1.07	3.32	0.08	-0.697162	41.2868	2.29469	964.123	-2.41327	87.9725	232.964	0	NA	NA	NA	NA	0	NA	NA	0.000257657	4.20123e-06	1050586	1.48849	-0.0357908	NA
2021-03-19 08:20:00	OP-50m	UA-100m	MC	451.591	36.23	9.76821	2.12453	0.198568	-60.5	0.02591	2.339	1.752	1.07	3.32	0.08	-0.697162	41.2868	2.29469	964.123	-2.41327	87.9725	232.964	0	NA	NA	NA	NA	0	NA	NA	0.000840661	7.37939e-06	3427639	1.49786	0.0291555	NA
2021-03-19 08:20:00	OP-UW	UA-100m	MC	451.591	36.23	9.76821	2.12453	0.198568	-60.5	0.02591	2.339	1.752	1.07	3.32	0.08	-0.697162	41.2868	2.29469	964.123	-2.41327	87.9725	232.964	0	NA	NA	NA	NA	0	NA	NA	0	NA	0	1.49105	NA	NA
2021-03-19 08:20:00	OP-100m	UA-150m	MC	451.591	35.997	9.77591	2.18277	0.189594	-48.2	0.01826	2.318	1.955	1.116	3.46	0.08	-0.697162	41.2868	2.29469	964.123	-2.41327	87.9725	232.964	0	NA	NA	NA	NA	0	NA	NA	0.000509003	5.62751e-06	2056643	1.4854	-0.039968	NA
2021-03-19 08:20:00	OP-150m	UA-150m	MC	451.591	35.997	9.77591	2.18277	0.189594	-48.2	0.01826	2.318	1.955	1.116	3.46	0.08	-0.697162	41.2868	2.29469	964.123	-2.41327	87.9725	232.964	0	NA	NA	NA	NA	0	NA	NA	0.000344904	4.50759e-06	1402795	1.46289	-0.293898	NA
2021-03-19 08:20:00	OP-200m	UA-150m	MC	451.591	35.997	9.77591	2.18277	0.189594	-48.2	0.01826	2.318	1.955	1.116	3.46	0.08	-0.697162	41.2868	2.29469	964.123	-2.41327	87.9725	232.964	0	NA	NA	NA	NA	0	NA	NA	0.000246492	4.33352e-06	990243	1.48849	-0.0374119	NA
2021-03-19 08:20:00	OP-50m	UA-150m	MC	451.591	35.997	9.77591	2.18277	0.189594	-48.2	0.01826	2.318	1.955	1.116	3.46	0.08	-0.697162	41.2868	2.29469	964.123	-2.41327	87.9725	232.964	0	NA	NA	NA	NA	0	NA	NA	0.000827165	6.99029e-06	3378313	1.49786	0.0296312	NA
2021-03-19 08:20:00	OP-UW	UA-150m	MC	451.591	35.997	9.77591	2.18277	0.189594	-48.2	0.01826	2.318	1.955	1.116	3.46	0.08	-0.697162	41.2868	2.29469	964.123	-2.41327	87.9725	232.964	0	NA	NA	NA	NA	0	NA	NA	0	NA	0	1.49105	NA	NA
2021-03-19 08:30:00	OP-100m	UA-UW	MC	451.591	29.661	11.972	1.91337	0.166176	-20.9	0.01538	2.109	2.462	1.37	4.457	0.2	-0.424508	34.2837	2.31593	964.237	-2.18982	87.6735	256.515	0	NA	NA	NA	NA	0	NA	NA	0.000407899	4.74708e-06	1712659	1.46672	-0.0478794	NA
2021-03-19 08:30:00	OP-150m	UA-UW	MC	451.591	29.661	11.972	1.91337	0.166176	-20.9	0.01538	2.109	2.462	1.37	4.457	0.2	-0.424508	34.2837	2.31593	964.237	-2.18982	87.6735	256.515	0	NA	NA	NA	NA	0	NA	NA	NA	3.38946e-06	844442	1.45839	NA	NA
2021-03-19 08:30:00	OP-200m	UA-UW	MC	451.591	29.661	11.972	1.91337	0.166176	-20.9	0.01538	2.109	2.462	1.37	4.457	0.2	-0.424508	34.2837	2.31593	964.237	-2.18982	87.6735	256.515	0	NA	NA	NA	NA	0	NA	NA	NA	2.03136e-06	389135	1.47332	NA	NA
2021-03-19 08:30:00	OP-50m	UA-UW	MC	451.591	29.661	11.972	1.91337	0.166176	-20.9	0.01538	2.109	2.462	1.37	4.457	0.2	-0.424508	34.2837	2.31593	964.237	-2.18982	87.6735	256.515	0	NA	NA	NA	NA	0	NA	NA	0.000775191	6.937e-06	3201176	1.48426	0.0562452	NA
2021-03-19 08:30:00	OP-UW	UA-UW	MC	451.591	29.661	11.972	1.91337	0.166176	-20.9	0.01538	2.109	2.462	1.37	4.457	0.2	-0.424508	34.2837	2.31593	964.237	-2.18982	87.6735	256.515	0	NA	NA	NA	NA	0	NA	NA	0	NA	0	1.47214	NA	NA
2021-03-19 08:30:00	OP-100m	UA-100m	MC	451.591	31.039	11.6988	2.14898	0.171712	-29.3	0.01136	2.42	2.324	1.174	3.584	0.08	-0.424508	34.2837	2.31593	964.237	-2.18982	87.6735	256.515	0	NA	NA	NA	NA	0	NA	NA	0.000506036	5.72431e-06	1913202	1.46672	-0.0385939	NA
2021-03-19 08:30:00	OP-150m	UA-100m	MC	451.591	31.039	11.6988	2.14898	0.171712	-29.3	0.01136	2.42	2.324	1.174	3.584	0.08	-0.424508	34.2837	2.31593	964.237	-2.18982	87.6735	256.515	0	NA	NA	NA	NA	0	NA	NA	0.000283328	4.24787e-06	1074128	1.45839	-0.174756	NA
2021-03-19 08:30:00	OP-200m	UA-100m	MC	451.591	31.039	11.6988	2.14898	0.171712	-29.3	0.01136	2.42	2.324	1.174	3.584	0.08	-0.424508	34.2837	2.31593	964.237	-2.18982	87.6735	256.515	0	NA	NA	NA	NA	0	NA	NA	0.000141037	2.77564e-06	547630	1.47332	0.0299062	NA
2021-03-19 08:30:00	OP-50m	UA-100m	MC	451.591	31.039	11.6988	2.14898	0.171712	-29.3	0.01136	2.42	2.324	1.174	3.584	0.08	-0.424508	34.2837	2.31593	964.237	-2.18982	87.6735	256.515	0	NA	NA	NA	NA	0	NA	NA	0.000866418	7.42445e-06	3267694	1.48426	0.050323	NA
2021-03-19 08:30:00	OP-UW	UA-100m	MC	451.591	31.039	11.6988	2.14898	0.171712	-29.3	0.01136	2.42	2.324	1.174	3.584	0.08	-0.424508	34.2837	2.31593	964.237	-2.18982	87.6735	256.515	0	NA	NA	NA	NA	0	NA	NA	0	NA	0	1.47214	NA	NA
2021-03-19 08:30:00	OP-100m	UA-150m	MC	451.591	32.274	11.274	2.21792	0.195845	-32.9	0.01863	2.129	1.998	1.134	3.451	0.08	-0.424508	34.2837	2.31593	964.237	-2.18982	87.6735	256.515	0	NA	NA	NA	NA	0	NA	NA	0.000463349	5.33276e-06	1942469	1.46672	-0.0421495	NA
2021-03-19 08:30:00	OP-150m	UA-150m	MC	451.591	32.274	11.274	2.21792	0.195845	-32.9	0.01863	2.129	1.998	1.134	3.451	0.08	-0.424508	34.2837	2.31593	964.237	-2.18982	87.6735	256.515	0	NA	NA	NA	NA	0	NA	NA	0.000291599	4.04566e-06	1229079	1.45839	-0.169799	NA
2021-03-19 08:30:00	OP-200m	UA-150m	MC	451.591	32.274	11.274	2.21792	0.195845	-32.9	0.01863	2.129	1.998	1.134	3.451	0.08	-0.424508	34.2837	2.31593	964.237	-2.18982	87.6735	256.515	0	NA	NA	NA	NA	0	NA	NA	0.000155575	2.71029e-06	658383	1.47332	0.0271116	NA
2021-03-19 08:30:00	OP-50m	UA-150m	MC	451.591	32.274	11.274	2.21792	0.195845	-32.9	0.01863	2.129	1.998	1.134	3.451	0.08	-0.424508	34.2837	2.31593	964.237	-2.18982	87.6735	256.515	0	NA	NA	NA	NA	0	NA	NA	0.000796781	8.49365e-06	3285165	1.48426	0.0547211	NA
2021-03-19 08:30:00	OP-UW	UA-150m	MC	451.591	32.274	11.274	2.21792	0.195845	-32.9	0.01863	2.129	1.998	1.134	3.451	0.08	-0.424508	34.2837	2.31593	964.237	-2.18982	87.6735	256.515	0	NA	NA	NA	NA	0	NA	NA	0	NA	0	1.47214	NA	NA
2021-03-19 08:40:00	OP-100m	UA-UW	MC	451.591	31.411	13.7243	1.91148	0.175658	-17.4	0.0191	2.555	2.531	1.277	3.856	0.2	-0.179199	30.4946	2.37815	964.337	-2.01327	87.2062	279.878	0	NA	NA	NA	NA	0	NA	NA	0.000401524	4.88751e-06	1613780	1.4431	-0.0103351	NA
2021-03-19 08:40:00	OP-150m	UA-UW	MC	451.591	31.411	13.7243	1.91148	0.175658	-17.4	0.0191	2.555	2.531	1.277	3.856	0.2	-0.179199	30.4946	2.37815	964.337	-2.01327	87.2062	279.878	0	NA	NA	NA	NA	0	NA	NA	0.000219398	3.46194e-06	892056	1.44289	-0.0224751	NA
2021-03-19 08:40:00	OP-200m	UA-UW	MC	451.591	31.411	13.7243	1.91148	0.175658	-17.4	0.0191	2.555	2.531	1.277	3.856	0.2	-0.179199	30.4946	2.37815	964.337	-2.01327	87.2062	279.878	0	NA	NA	NA	NA	0	NA	NA	0.000111291	2.42461e-06	460896	1.44421	-0.00142177	NA
2021-03-19 08:40:00	OP-50m	UA-UW	MC	451.591	31.411	13.7243	1.91148	0.175658	-17.4	0.0191	2.555	2.531	1.277	3.856	0.2	-0.179199	30.4946	2.37815	964.337	-2.01327	87.2062	279.878	0	NA	NA	NA	NA	0	NA	NA	0.000748285	7.00823e-06	3016098	1.45582	0.0556347	NA
2021-03-19 08:40:00	OP-UW	UA-UW	MC	451.591	31.411	13.7243	1.91148	0.175658	-17.4	0.0191	2.555	2.531	1.277	3.856	0.2	-0.179199	30.4946	2.37815	964.337	-2.01327	87.2062	279.878	0	NA	NA	NA	NA	0	NA	NA	0	NA	0	1.44426	NA	NA
2021-03-19 08:40:00	OP-100m	UA-100m	MC	451.591	29.518	12.5171	2.2265	0.178137	-19	0.01047	2.904	2.552	1.165	3.411	0.08	-0.179199	30.4946	2.37815	964.337	-2.01327	87.2062	279.878	0	NA	NA	NA	NA	0	NA	NA	0.000449345	6.75358e-06	1682526	1.4431	-0.00923524	NA
2021-03-19 08:40:00	OP-150m	UA-100m	MC	451.591	29.518	12.5171	2.2265	0.178137	-19	0.01047	2.904	2.552	1.165	3.411	0.08	-0.179199	30.4946	2.37815	964.337	-2.01327	87.2062	279.878	0	NA	NA	NA	NA	0	NA	NA	NA	3.66301e-06	875367	1.44289	NA	NA
2021-03-19 08:40:00	OP-200m	UA-100m	MC	451.591	29.518	12.5171	2.2265	0.178137	-19	0.01047	2.904	2.552	1.165	3.411	0.08	-0.179199	30.4946	2.37815	964.337	-2.01327	87.2062	279.878	0	NA	NA	NA	NA	0	NA	NA	NA	2.97455e-06	396592	1.44421	NA	NA
2021-03-19 08:40:00	OP-50m	UA-100m	MC	451.591	29.518	12.5171	2.2265	0.178137	-19	0.01047	2.904	2.552	1.165	3.411	0.08	-0.179199	30.4946	2.37815	964.337	-2.01327	87.2062	279.878	0	NA	NA	NA	NA	0	NA	NA	0.000829082	9.13506e-06	3106124	1.45582	0.0502128	NA
2021-03-19 08:40:00	OP-UW	UA-100m	MC	451.591	29.518	12.5171	2.2265	0.178137	-19	0.01047	2.904	2.552	1.165	3.411	0.08	-0.179199	30.4946	2.37815	964.337	-2.01327	87.2062	279.878	0	NA	NA	NA	NA	0	NA	NA	0	NA	0	1.44426	NA	NA
2021-03-19 08:40:00	OP-100m	UA-150m	MC	451.591	32.324	12.3456	2.28464	0.185311	-19.3	0.01128	2.641	2.423	1.164	3.411	0.08	-0.179199	30.4946	2.37815	964.337	-2.01327	87.2062	279.878	0	NA	NA	NA	NA	0	NA	NA	0.000450937	5.36878e-06	1762006	1.4431	-0.00920263	NA
2021-03-19 08:40:00	OP-150m	UA-150m	MC	451.591	32.324	12.3456	2.28464	0.185311	-19.3	0.01128	2.641	2.423	1.164	3.411	0.08	-0.179199	30.4946	2.37815	964.337	-2.01327	87.2062	279.878	0	NA	NA	NA	NA	0	NA	NA	0.000264905	4.37341e-06	1031888	1.44289	-0.0186142	NA
2021-03-19 08:40:00	OP-200m	UA-150m	MC	451.591	32.324	12.3456	2.28464	0.185311	-19.3	0.01128	2.641	2.423	1.164	3.411	0.08	-0.179199	30.4946	2.37815	964.337	-2.01327	87.2062	279.878	0	NA	NA	NA	NA	0	NA	NA	0.000148151	2.94865e-06	592919	1.44421	-0.00106803	NA
2021-03-19 08:40:00	OP-50m	UA-150m	MC	451.591	32.324	12.3456	2.28464	0.185311	-19.3	0.01128	2.641	2.423	1.164	3.411	0.08	-0.179199	30.4946	2.37815	964.337	-2.01327	87.2062	279.878	0	NA	NA	NA	NA	0	NA	NA	0.000793038	7.36491e-06	3093406	1.45582	0.0524951	NA
2021-03-19 08:40:00	OP-UW	UA-150m	MC	451.591	32.324	12.3456	2.28464	0.185311	-19.3	0.01128	2.641	2.423	1.164	3.411	0.08	-0.179199	30.4946	2.37815	964.337	-2.01327	87.2062	279.878	0	NA	NA	NA	NA	0	NA	NA	0	NA	0	1.44426	NA	NA
2021-03-19 08:50:00	OP-100m	UA-UW	MC	451.591	35.581	13.2141	2.12736	0.183731	-21.6	0.01513	2.993	2.641	1.286	4.007	0.2	0.0975281	33.6511	2.51735	964.313	-1.87654	86.3327	305.87	0	NA	NA	NA	NA	0	NA	NA	0.000414408	5.82171e-06	1787966	1.43352	0.072916	NA
2021-03-19 08:50:00	OP-150m	UA-UW	MC	451.591	35.581	13.2141	2.12736	0.183731	-21.6	0.01513	2.993	2.641	1.286	4.007	0.2	0.0975281	33.6511	2.51735	964.313	-1.87654	86.3327	305.87	0	NA	NA	NA	NA	0	NA	NA	0.00025454	3.85914e-06	1106358	1.42917	0.0571741	NA
2021-03-19 08:50:00	OP-200m	UA-UW	MC	451.591	35.581	13.2141	2.12736	0.183731	-21.6	0.01513	2.993	2.641	1.286	4.007	0.2	0.0975281	33.6511	2.51735	964.313	-1.87654	86.3327	305.87	0	NA	NA	NA	NA	0	NA	NA	0.000164841	2.88355e-06	723951	1.4336	0.18498	NA
2021-03-19 08:50:00	OP-50m	UA-UW	MC	451.591	35.581	13.2141	2.12736	0.183731	-21.6	0.01513	2.993	2.641	1.286	4.007	0.2	0.0975281	33.6511	2.51735	964.313	-1.87654	86.3327	305.87	0	NA	NA	NA	NA	0	NA	NA	0.000739637	7.61989e-06	3175745	1.43861	0.0656206	NA
2021-03-19 08:50:00	OP-UW	UA-UW	MC	451.591	35.581	13.2141	2.12736	0.183731	-21.6	0.01513	2.993	2.641	1.286	4.007	0.2	0.0975281	33.6511	2.51735	964.313	-1.87654	86.3327	305.87	0	NA	NA	NA	NA	0	NA	NA	0	NA	0	1.42513	NA	NA
2021-03-19 08:50:00	OP-100m	UA-100m	MC	451.591	30.965	12.3303	2.262	0.184676	-17.8	0.01142	3.256	2.411	1.344	4.187	0.08	0.0975281	33.6511	2.51735	964.313	-1.87654	86.3327	305.87	0	NA	NA	NA	NA	0	NA	NA	0.000385571	4.53781e-06	1720245	1.43352	0.0783693	NA
2021-03-19 08:50:00	OP-150m	UA-100m	MC	451.591	30.965	12.3303	2.262	0.184676	-17.8	0.01142	3.256	2.411	1.344	4.187	0.08	0.0975281	33.6511	2.51735	964.313	-1.87654	86.3327	305.87	0	NA	NA	NA	NA	0	NA	NA	0.000211559	3.33709e-06	952182	1.42917	0.06879	NA
2021-03-19 08:50:00	OP-200m	UA-100m	MC	451.591	30.965	12.3303	2.262	0.184676	-17.8	0.01142	3.256	2.411	1.344	4.187	0.08	0.0975281	33.6511	2.51735	964.313	-1.87654	86.3327	305.87	0	NA	NA	NA	NA	0	NA	NA	0.000103185	2.33031e-06	469581	1.4336	0.29551	NA
2021-03-19 08:50:00	OP-50m	UA-100m	MC	451.591	30.965	12.3303	2.262	0.184676	-17.8	0.01142	3.256	2.411	1.344	4.187	0.08	0.0975281	33.6511	2.51735	964.313	-1.87654	86.3327	305.87	0	NA	NA	NA	NA	0	NA	NA	0.000701017	6.39051e-06	3130399	1.43861	0.0692356	NA
2021-03-19 08:50:00	OP-UW	UA-100m	MC	451.591	30.965	12.3303	2.262	0.184676	-17.8	0.01142	3.256	2.411	1.344	4.187	0.08	0.0975281	33.6511	2.51735	964.313	-1.87654	86.3327	305.87	0	NA	NA	NA	NA	0	NA	NA	0	NA	0	1.42513	NA	NA
2021-03-19 08:50:00	OP-100m	UA-150m	MC	451.591	33.967	11.7098	2.34494	0.219532	-29.6	0.02372	2.495	1.98	1.058	3.175	0.08	0.0975281	33.6511	2.51735	964.313	-1.87654	86.3327	305.87	0	NA	NA	NA	NA	0	NA	NA	0.000446068	5.25387e-06	1925359	1.43352	0.0677407	NA
2021-03-19 08:50:00	OP-150m	UA-150m	MC	451.591	33.967	11.7098	2.34494	0.219532	-29.6	0.02372	2.495	1.98	1.058	3.175	0.08	0.0975281	33.6511	2.51735	964.313	-1.87654	86.3327	305.87	0	NA	NA	NA	NA	0	NA	NA	0.000288122	3.87182e-06	1258963	1.42917	0.0505102	NA
2021-03-19 08:50:00	OP-200m	UA-150m	MC	451.591	33.967	11.7098	2.34494	0.219532	-29.6	0.02372	2.495	1.98	1.058	3.175	0.08	0.0975281	33.6511	2.51735	964.313	-1.87654	86.3327	305.87	0	NA	NA	NA	NA	0	NA	NA	0.000177505	2.92485e-06	775934	1.4336	0.171783	NA
2021-03-19 08:50:00	OP-50m	UA-150m	MC	451.591	33.967	11.7098	2.34494	0.219532	-29.6	0.02372	2.495	1.98	1.058	3.175	0.08	0.0975281	33.6511	2.51735	964.313	-1.87654	86.3327	305.87	0	NA	NA	NA	NA	0	NA	NA	0.000741705	6.28997e-06	3227483	1.43861	0.0654376	NA
2021-03-19 08:50:00	OP-UW	UA-150m	MC	451.591	33.967	11.7098	2.34494	0.219532	-29.6	0.02372	2.495	1.98	1.058	3.175	0.08	0.0975281	33.6511	2.51735	964.313	-1.87654	86.3327	305.87	0	NA	NA	NA	NA	0	NA	NA	0	NA	0	1.42513	NA	NA
2021-03-19 09:00:00	OP-100m	UA-UW	MC	451.591	49.901	22.1492	1.74441	0.175759	-12.8	0.02597	3.007	3.229	1.362	4.075	0.2	0.404873	37.9063	2.35778	964.387	-1.76327	84.9624	331.992	0	NA	NA	NA	NA	0	NA	NA	0.000351754	4.35029e-06	1473231	1.42414	0.121332	NA
2021-03-19 09:00:00	OP-150m	UA-UW	MC	451.591	49.901	22.1492	1.74441	0.175759	-12.8	0.02597	3.007	3.229	1.362	4.075	0.2	0.404873	37.9063	2.35778	964.387	-1.76327	84.9624	331.992	0	NA	NA	NA	NA	0	NA	NA	0.000213812	3.63833e-06	889559	1.41207	-0.00373692	NA
2021-03-19 09:00:00	OP-200m	UA-UW	MC	451.591	49.901	22.1492	1.74441	0.175759	-12.8	0.02597	3.007	3.229	1.362	4.075	0.2	0.404873	37.9063	2.35778	964.387	-1.76327	84.9624	331.992	0	NA	NA	NA	NA	0	NA	NA	0.000137986	2.83781e-06	581456	1.42212	0.256626	NA
2021-03-19 09:00:00	OP-50m	UA-UW	MC	451.591	49.901	22.1492	1.74441	0.175759	-12.8	0.02597	3.007	3.229	1.362	4.075	0.2	0.404873	37.9063	2.35778	964.387	-1.76327	84.9624	331.992	0	NA	NA	NA	NA	0	NA	NA	0.000673724	7.50564e-06	2790504	NA	NA	NA
2021-03-19 09:00:00	OP-UW	UA-UW	MC	451.591	49.901	22.1492	1.74441	0.175759	-12.8	0.02597	3.007	3.229	1.362	4.075	0.2	0.404873	37.9063	2.35778	964.387	-1.76327	84.9624	331.992	0	NA	NA	NA	NA	0	NA	NA	0	NA	0	1.41229	NA	NA
2021-03-19 09:00:00	OP-100m	UA-100m	MC	451.591	53.175	22.2462	1.71992	0.200777	-10.9	0.04429	2.656	3.247	1.15	3.159	0.08	0.404873	37.9063	2.35778	964.387	-1.76327	84.9624	331.992	0	NA	NA	NA	NA	0	NA	NA	0.000310502	4.10823e-06	1231832	1.42414	0.137451	NA
2021-03-19 09:00:00	OP-150m	UA-100m	MC	451.591	53.175	22.2462	1.71992	0.200777	-10.9	0.04429	2.656	3.247	1.15	3.159	0.08	0.404873	37.9063	2.35778	964.387	-1.76327	84.9624	331.992	0	NA	NA	NA	NA	0	NA	NA	0.000175044	2.96675e-06	697609	1.41207	-0.00456455	NA
2021-03-19 09:00:00	OP-200m	UA-100m	MC	451.591	53.175	22.2462	1.71992	0.200777	-10.9	0.04429	2.656	3.247	1.15	3.159	0.08	0.404873	37.9063	2.35778	964.387	-1.76327	84.9624	331.992	0	NA	NA	NA	NA	0	NA	NA	0.000104414	2.26754e-06	423851	1.42212	0.339141	NA
2021-03-19 09:00:00	OP-50m	UA-100m	MC	451.591	53.175	22.2462	1.71992	0.200777	-10.9	0.04429	2.656	3.247	1.15	3.159	0.08	0.404873	37.9063	2.35778	964.387	-1.76327	84.9624	331.992	0	NA	NA	NA	NA	0	NA	NA	0.000650481	6.52306e-06	2567847	NA	NA	NA
2021-03-19 09:00:00	OP-UW	UA-100m	MC	451.591	53.175	22.2462	1.71992	0.200777	-10.9	0.04429	2.656	3.247	1.15	3.159	0.08	0.404873	37.9063	2.35778	964.387	-1.76327	84.9624	331.992	0	NA	NA	NA	NA	0	NA	NA	0	NA	0	1.41229	NA	NA
2021-03-19 09:00:00	OP-100m	UA-150m	MC	451.591	55.759	22.393	1.95323	0.135393	-4.5	0.003056	3.843	5.354	1.853	5.389	0.08	0.404873	37.9063	2.35778	964.387	-1.76327	84.9624	331.992	0	NA	NA	NA	NA	0	NA	NA	NA	4.29929e-06	969333	1.42414	NA	NA
2021-03-19 09:00:00	OP-150m	UA-150m	MC	451.591	55.759	22.393	1.95323	0.135393	-4.5	0.003056	3.843	5.354	1.853	5.389	0.08	0.404873	37.9063	2.35778	964.387	-1.76327	84.9624	331.992	0	NA	NA	NA	NA	0	NA	NA	NA	3.5369e-06	474790	1.41207	NA	NA
2021-03-19 09:00:00	OP-200m	UA-150m	MC	451.591	55.759	22.393	1.95323	0.135393	-4.5	0.003056	3.843	5.354	1.853	5.389	0.08	0.404873	37.9063	2.35778	964.387	-1.76327	84.9624	331.992	0	NA	NA	NA	NA	0	NA	NA	NA	2.39751e-06	269452	1.42212	NA	NA
2021-03-19 09:00:00	OP-50m	UA-150m	MC	451.591	55.759	22.393	1.95323	0.135393	-4.5	0.003056	3.843	5.354	1.853	5.389	0.08	0.404873	37.9063	2.35778	964.387	-1.76327	84.9624	331.992	0	NA	NA	NA	NA	0	NA	NA	NA	6.36794e-06	2137043	NA	NA	NA
2021-03-19 09:00:00	OP-UW	UA-150m	MC	451.591	55.759	22.393	1.95323	0.135393	-4.5	0.003056	3.843	5.354	1.853	5.389	0.08	0.404873	37.9063	2.35778	964.387	-1.76327	84.9624	331.992	0	NA	NA	NA	NA	0	NA	NA	NA	NA	0	1.41229	NA	NA
2021-03-19 09:10:00	OP-100m	UA-UW	MC	451.591	67.552	13.856	2.31519	0.180161	-14.5	0.008271	3.757	3.15	1.257	3.667	0.2	0.943019	66.1648	2.29142	964.4	-1.65	82.0278	354.26	0	NA	NA	NA	NA	0	NA	NA	0.000288358	9.19546e-06	1128972	1.41033	0.156979	NA
2021-03-19 09:10:00	OP-150m	UA-UW	MC	451.591	67.552	13.856	2.31519	0.180161	-14.5	0.008271	3.757	3.15	1.257	3.667	0.2	0.943019	66.1648	2.29142	964.4	-1.65	82.0278	354.26	0	NA	NA	NA	NA	0	NA	NA	NA	2.7177e-06	381274	1.39824	NA	NA
2021-03-19 09:10:00	OP-200m	UA-UW	MC	451.591	67.552	13.856	2.31519	0.180161	-14.5	0.008271	3.757	3.15	1.257	3.667	0.2	0.943019	66.1648	2.29142	964.4	-1.65	82.0278	354.26	0	NA	NA	NA	NA	0	NA	NA	NA	1.12516e-06	129542	1.40862	NA	NA
2021-03-19 09:10:00	OP-50m	UA-UW	MC	451.591	67.552	13.856	2.31519	0.180161	-14.5	0.008271	3.757	3.15	1.257	3.667	0.2	0.943019	66.1648	2.29142	964.4	-1.65	82.0278	354.26	0	NA	NA	NA	NA	0	NA	NA	0.000715708	6.8994e-06	2860132	1.40007	0.0116095	NA
2021-03-19 09:10:00	OP-UW	UA-UW	MC	451.591	67.552	13.856	2.31519	0.180161	-14.5	0.008271	3.757	3.15	1.257	3.667	0.2	0.943019	66.1648	2.29142	964.4	-1.65	82.0278	354.26	0	NA	NA	NA	NA	0	NA	NA	0	NA	0	1.39776	NA	NA
2021-03-19 09:10:00	OP-100m	UA-100m	MC	451.591	74.975	10.4475	2.60012	0.208533	-14.1	0.009844	2.489	2.057	1.144	3.236	0.08	0.943019	66.1648	2.29142	964.4	-1.65	82.0278	354.26	0	NA	NA	NA	NA	0	NA	NA	NA	1.996e-06	391433	1.41033	NA	NA
2021-03-19 09:10:00	OP-150m	UA-100m	MC	451.591	74.975	10.4475	2.60012	0.208533	-14.1	0.009844	2.489	2.057	1.144	3.236	0.08	0.943019	66.1648	2.29142	964.4	-1.65	82.0278	354.26	0	NA	NA	NA	NA	0	NA	NA	NA	3.14878e-07	14163	1.39824	NA	NA
2021-03-19 09:10:00	OP-200m	UA-100m	MC	451.591	74.975	10.4475	2.60012	0.208533	-14.1	0.009844	2.489	2.057	1.144	3.236	0.08	0.943019	66.1648	2.29142	964.4	-1.65	82.0278	354.26	0	NA	NA	NA	NA	0	NA	NA	NA	3.49983e-08	386	1.40862	NA	NA
2021-03-19 09:10:00	OP-50m	UA-100m	MC	451.591	74.975	10.4475	2.60012	0.208533	-14.1	0.009844	2.489	2.057	1.144	3.236	0.08	0.943019	66.1648	2.29142	964.4	-1.65	82.0278	354.26	0	NA	NA	NA	NA	0	NA	NA	0.000661666	6.62336e-06	2783955	1.40007	0.0125577	NA
2021-03-19 09:10:00	OP-UW	UA-100m	MC	451.591	74.975	10.4475	2.60012	0.208533	-14.1	0.009844	2.489	2.057	1.144	3.236	0.08	0.943019	66.1648	2.29142	964.4	-1.65	82.0278	354.26	0	NA	NA	NA	NA	0	NA	NA	0	NA	0	1.39776	NA	NA
2021-03-19 09:10:00	OP-100m	UA-150m	MC	451.591	71.729	12.1461	2.53702	0.21719	-14.6	0.01367	2.549	2.234	1.154	3.28	0.08	0.943019	66.1648	2.29142	964.4	-1.65	82.0278	354.26	0	NA	NA	NA	NA	0	NA	NA	NA	3.0081e-06	780155	1.41033	NA	NA
2021-03-19 09:10:00	OP-150m	UA-150m	MC	451.591	71.729	12.1461	2.53702	0.21719	-14.6	0.01367	2.549	2.234	1.154	3.28	0.08	0.943019	66.1648	2.29142	964.4	-1.65	82.0278	354.26	0	NA	NA	NA	NA	0	NA	NA	NA	1.02814e-06	96614	1.39824	NA	NA
2021-03-19 09:10:00	OP-200m	UA-150m	MC	451.591	71.729	12.1461	2.53702	0.21719	-14.6	0.01367	2.549	2.234	1.154	3.28	0.08	0.943019	66.1648	2.29142	964.4	-1.65	82.0278	354.26	0	NA	NA	NA	NA	0	NA	NA	NA	3.54416e-07	9967	1.40862	NA	NA
2021-03-19 09:10:00	OP-50m	UA-150m	MC	451.591	71.729	12.1461	2.53702	0.21719	-14.6	0.01367	2.549	2.234	1.154	3.28	0.08	0.943019	66.1648	2.29142	964.4	-1.65	82.0278	354.26	0	NA	NA	NA	NA	0	NA	NA	0.000641897	5.9889e-06	2851022	1.40007	0.0129444	NA
2021-03-19 09:10:00	OP-UW	UA-150m	MC	451.591	71.729	12.1461	2.53702	0.21719	-14.6	0.01367	2.549	2.234	1.154	3.28	0.08	0.943019	66.1648	2.29142	964.4	-1.65	82.0278	354.26	0	NA	NA	NA	NA	0	NA	NA	0	NA	0	1.39776	NA	NA
2021-03-19 09:20:00	OP-100m	UA-UW	MC	451.591	78.305	13.816	2.25616	0.21218	-11.2	0.01886	2.767	2.474	1.27	3.58	0.2	1.34956	69.1723	2.33753	964.437	-1.57655	80.2562	379.623	0	NA	NA	NA	NA	0	NA	NA	NA	1.3485e-06	288169	1.40078	NA	NA
2021-03-19 09:20:00	OP-150m	UA-UW	MC	451.591	78.305	13.816	2.25616	0.21218	-11.2	0.01886	2.767	2.474	1.27	3.58	0.2	1.34956	69.1723	2.33753	964.437	-1.57655	80.2562	379.623	0	NA	NA	NA	NA	0	NA	NA	NA	4.36103e-07	29473	1.3893	NA	NA
2021-03-19 09:20:00	OP-200m	UA-UW	MC	451.591	78.305	13.816	2.25616	0.21218	-11.2	0.01886	2.767	2.474	1.27	3.58	0.2	1.34956	69.1723	2.33753	964.437	-1.57655	80.2562	379.623	0	NA	NA	NA	NA	0	NA	NA	NA	1.26012e-07	3635	1.39664	NA	NA
2021-03-19 09:20:00	OP-50m	UA-UW	MC	451.591	78.305	13.816	2.25616	0.21218	-11.2	0.01886	2.767	2.474	1.27	3.58	0.2	1.34956	69.1723	2.33753	964.437	-1.57655	80.2562	379.623	0	NA	NA	NA	NA	0	NA	NA	0.000440067	4.48518e-06	2195152	1.3896	-0.060385	NA
2021-03-19 09:20:00	OP-UW	UA-UW	MC	451.591	78.305	13.816	2.25616	0.21218	-11.2	0.01886	2.767	2.474	1.27	3.58	0.2	1.34956	69.1723	2.33753	964.437	-1.57655	80.2562	379.623	0	NA	NA	NA	NA	0	NA	NA	0	NA	0	1.39698	NA	NA
2021-03-19 09:20:00	OP-100m	UA-100m	MC	451.591	81.486	15.3627	2.93214	0.261654	-22.8	0.01831	2.486	2.361	1.07	3.156	0.08	1.34956	69.1723	2.33753	964.437	-1.57655	80.2562	379.623	0	NA	NA	NA	NA	0	NA	NA	NA	8.77575e-07	145432	1.40078	NA	NA
2021-03-19 09:20:00	OP-150m	UA-100m	MC	451.591	81.486	15.3627	2.93214	0.261654	-22.8	0.01831	2.486	2.361	1.07	3.156	0.08	1.34956	69.1723	2.33753	964.437	-1.57655	80.2562	379.623	0	NA	NA	NA	NA	0	NA	NA	NA	1.27621e-07	5858	1.3893	NA	NA
2021-03-19 09:20:00	OP-200m	UA-100m	MC	451.591	81.486	15.3627	2.93214	0.261654	-22.8	0.01831	2.486	2.361	1.07	3.156	0.08	1.34956	69.1723	2.33753	964.437	-1.57655	80.2562	379.623	0	NA	NA	NA	NA	0	NA	NA	NA	2.95556e-08	654	1.39664	NA	NA
2021-03-19 09:20:00	OP-50m	UA-100m	MC	451.591	81.486	15.3627	2.93214	0.261654	-22.8	0.01831	2.486	2.361	1.07	3.156	0.08	1.34956	69.1723	2.33753	964.437	-1.57655	80.2562	379.623	0	NA	NA	NA	NA	0	NA	NA	0.000408023	4.27499e-06	2146621	1.3896	-0.0651273	NA
2021-03-19 09:20:00	OP-UW	UA-100m	MC	451.591	81.486	15.3627	2.93214	0.261654	-22.8	0.01831	2.486	2.361	1.07	3.156	0.08	1.34956	69.1723	2.33753	964.437	-1.57655	80.2562	379.623	0	NA	NA	NA	NA	0	NA	NA	0	NA	0	1.39698	NA	NA
2021-03-19 09:20:00	OP-100m	UA-150m	MC	451.591	83.643	13.5076	2.79622	0.245196	-14.9	0.01534	2.62	2.657	1.238	3.584	0.08	1.34956	69.1723	2.33753	964.437	-1.57655	80.2562	379.623	0	NA	NA	NA	NA	0	NA	NA	NA	8.89001e-07	98649	1.40078	NA	NA
2021-03-19 09:20:00	OP-150m	UA-150m	MC	451.591	83.643	13.5076	2.79622	0.245196	-14.9	0.01534	2.62	2.657	1.238	3.584	0.08	1.34956	69.1723	2.33753	964.437	-1.57655	80.2562	379.623	0	NA	NA	NA	NA	0	NA	NA	NA	1.6233e-07	5114	1.3893	NA	NA
2021-03-19 09:20:00	OP-200m	UA-150m	MC	451.591	83.643	13.5076	2.79622	0.245196	-14.9	0.01534	2.62	2.657	1.238	3.584	0.08	1.34956	69.1723	2.33753	964.437	-1.57655	80.2562	379.623	0	NA	NA	NA	NA	0	NA	NA	NA	2.57386e-08	541	1.39664	NA	NA
2021-03-19 09:20:00	OP-50m	UA-150m	MC	451.591	83.643	13.5076	2.79622	0.245196	-14.9	0.01534	2.62	2.657	1.238	3.584	0.08	1.34956	69.1723	2.33753	964.437	-1.57655	80.2562	379.623	0	NA	NA	NA	NA	0	NA	NA	0.000320245	3.65227e-06	1765844	1.3896	-0.0829785	NA
2021-03-19 09:20:00	OP-UW	UA-150m	MC	451.591	83.643	13.5076	2.79622	0.245196	-14.9	0.01534	2.62	2.657	1.238	3.584	0.08	1.34956	69.1723	2.33753	964.437	-1.57655	80.2562	379.623	0	NA	NA	NA	NA	0	NA	NA	0	NA	0	1.39698	NA	NA
2021-03-19 09:30:00	OP-100m	UA-UW	MC	451.591	91.701	13.7598	3.14125	0.195127	-10.5	0.002078	3.135	3.61	1.489	4.599	0.2	1.67345	86.5745	3.25382	964.413	-1.62345	78.6889	402.902	0	NA	NA	NA	NA	0	NA	NA	NA	4.24577e-07	19222	1.3928	NA	NA
2021-03-19 09:30:00	OP-150m	UA-UW	MC	451.591	91.701	13.7598	3.14125	0.195127	-10.5	0.002078	3.135	3.61	1.489	4.599	0.2	1.67345	86.5745	3.25382	964.413	-1.62345	78.6889	402.902	0	NA	NA	NA	NA	0	NA	NA	NA	6.82631e-08	428	1.38062	NA	NA
2021-03-19 09:30:00	OP-200m	UA-UW	MC	451.591	91.701	13.7598	3.14125	0.195127	-10.5	0.002078	3.135	3.61	1.489	4.599	0.2	1.67345	86.5745	3.25382	964.413	-1.62345	78.6889	402.902	0	NA	NA	NA	NA	0	NA	NA	NA	4.64436e-09	29	1.3841	NA	NA
2021-03-19 09:30:00	OP-50m	UA-UW	MC	451.591	91.701	13.7598	3.14125	0.195127	-10.5	0.002078	3.135	3.61	1.489	4.599	0.2	1.67345	86.5745	3.25382	964.413	-1.62345	78.6889	402.902	0	NA	NA	NA	NA	0	NA	NA	0.000156122	2.52971e-06	801864	1.37923	-0.116868	NA
2021-03-19 09:30:00	OP-UW	UA-UW	MC	451.591	91.701	13.7598	3.14125	0.195127	-10.5	0.002078	3.135	3.61	1.489	4.599	0.2	1.67345	86.5745	3.25382	964.413	-1.62345	78.6889	402.902	0	NA	NA	NA	NA	0	NA	NA	0	NA	0	1.3843	NA	NA
2021-03-19 09:30:00	OP-100m	UA-50m	MC	451.591	87.621	9.07573	3.54894	0.173329	-9.8	0.00037	4.192	2.837	1.542	4.789	0.08	1.67345	86.5745	3.25382	964.413	-1.62345	78.6889	402.902	0	NA	NA	NA	NA	0	NA	NA	NA	9.86613e-08	3103	1.3928	NA	NA
2021-03-19 09:30:00	OP-150m	UA-50m	MC	451.591	87.621	9.07573	3.54894	0.173329	-9.8	0.00037	4.192	2.837	1.542	4.789	0.08	1.67345	86.5745	3.25382	964.413	-1.62345	78.6889	402.902	0	NA	NA	NA	NA	0	NA	NA	NA	8.85587e-10	10	1.38062	NA	NA
2021-03-19 09:30:00	OP-200m	UA-50m	MC	451.591	87.621	9.07573	3.54894	0.173329	-9.8	0.00037	4.192	2.837	1.542	4.789	0.08	1.67345	86.5745	3.25382	964.413	-1.62345	78.6889	402.902	0	NA	NA	NA	NA	0	NA	NA	NA	NA	0	1.3841	NA	NA
2021-03-19 09:30:00	OP-50m	UA-50m	MC	451.591	87.621	9.07573	3.54894	0.173329	-9.8	0.00037	4.192	2.837	1.542	4.789	0.08	1.67345	86.5745	3.25382	964.413	-1.62345	78.6889	402.902	0	NA	NA	NA	NA	0	NA	NA	0.000239214	3.77999e-06	1117798	1.37923	-0.0762734	NA
2021-03-19 09:30:00	OP-UW	UA-50m	MC	451.591	87.621	9.07573	3.54894	0.173329	-9.8	0.00037	4.192	2.837	1.542	4.789	0.08	1.67345	86.5745	3.25382	964.413	-1.62345	78.6889	402.902	0	NA	NA	NA	NA	0	NA	NA	0	NA	0	1.3843	NA	NA
2021-03-19 09:30:00	OP-100m	UA-100m	MC	451.591	82.854	9.50125	3.13107	0.235686	-15.8	0.007324	2.852	2.19	1.12	3.203	0.08	1.67345	86.5745	3.25382	964.413	-1.62345	78.6889	402.902	0	NA	NA	NA	NA	0	NA	NA	NA	4.77538e-07	37170	1.3928	NA	NA
2021-03-19 09:30:00	OP-150m	UA-100m	MC	451.591	82.854	9.50125	3.13107	0.235686	-15.8	0.007324	2.852	2.19	1.12	3.203	0.08	1.67345	86.5745	3.25382	964.413	-1.62345	78.6889	402.902	0	NA	NA	NA	NA	0	NA	NA	NA	2.77221e-08	328	1.38062	NA	NA
2021-03-19 09:30:00	OP-200m	UA-100m	MC	451.591	82.854	9.50125	3.13107	0.235686	-15.8	0.007324	2.852	2.19	1.12	3.203	0.08	1.67345	86.5745	3.25382	964.413	-1.62345	78.6889	402.902	0	NA	NA	NA	NA	0	NA	NA	NA	NA	0	1.3841	NA	NA
2021-03-19 09:30:00	OP-50m	UA-100m	MC	451.591	82.854	9.50125	3.13107	0.235686	-15.8	0.007324	2.852	2.19	1.12	3.203	0.08	1.67345	86.5745	3.25382	964.413	-1.62345	78.6889	402.902	0	NA	NA	NA	NA	0	NA	NA	0.000412526	4.52185e-06	1976334	1.37923	-0.0442292	NA
2021-03-19 09:30:00	OP-UW	UA-100m	MC	451.591	82.854	9.50125	3.13107	0.235686	-15.8	0.007324	2.852	2.19	1.12	3.203	0.08	1.67345	86.5745	3.25382	964.413	-1.62345	78.6889	402.902	0	NA	NA	NA	NA	0	NA	NA	0	NA	0	1.3843	NA	NA
2021-03-19 09:30:00	OP-100m	UA-150m	MC	451.591	82.575	10.1601	3.15786	0.237337	-14	0.00706	2.882	2.37	1.267	3.672	0.08	1.67345	86.5745	3.25382	964.413	-1.62345	78.6889	402.902	0	NA	NA	NA	NA	0	NA	NA	NA	5.30408e-07	52379	1.3928	NA	NA
2021-03-19 09:30:00	OP-150m	UA-150m	MC	451.591	82.575	10.1601	3.15786	0.237337	-14	0.00706	2.882	2.37	1.267	3.672	0.08	1.67345	86.5745	3.25382	964.413	-1.62345	78.6889	402.902	0	NA	NA	NA	NA	0	NA	NA	NA	7.95331e-08	687	1.38062	NA	NA
2021-03-19 09:30:00	OP-200m	UA-150m	MC	451.591	82.575	10.1601	3.15786	0.237337	-14	0.00706	2.882	2.37	1.267	3.672	0.08	1.67345	86.5745	3.25382	964.413	-1.62345	78.6889	402.902	0	NA	NA	NA	NA	0	NA	NA	NA	1.1656e-08	88	1.3841	NA	NA
2021-03-19 09:30:00	OP-50m	UA-150m	MC	451.591	82.575	10.1601	3.15786	0.237337	-14	0.00706	2.882	2.37	1.267	3.672	0.08	1.67345	86.5745	3.25382	964.413	-1.62345	78.6889	402.902	0	NA	NA	NA	NA	0	NA	NA	0.000358582	3.913e-06	1936334	1.37923	-0.0508829	NA
2021-03-19 09:30:00	OP-UW	UA-150m	MC	451.591	82.575	10.1601	3.15786	0.237337	-14	0.00706	2.882	2.37	1.267	3.672	0.08	1.67345	86.5745	3.25382	964.413	-1.62345	78.6889	402.902	0	NA	NA	NA	NA	0	NA	NA	0	NA	0	1.3843	NA	NA
2021-03-19 09:40:00	OP-100m	UA-UW	MC	451.591	69.441	12.2875	3.42428	0.227746	-16.7	0.003565	3.044	3.11	1.298	3.93	0.2	1.95222	78.7657	3.43142	964.4	-1.65	76.6185	422.56	0	NA	NA	NA	NA	0	NA	NA	0.000202001	3.03772e-06	1081057	1.37436	0.186993	NA
2021-03-19 09:40:00	OP-150m	UA-UW	MC	451.591	69.441	12.2875	3.42428	0.227746	-16.7	0.003565	3.044	3.11	1.298	3.93	0.2	1.95222	78.7657	3.43142	964.4	-1.65	76.6185	422.56	0	NA	NA	NA	NA	0	NA	NA	NA	1.57405e-06	268551	1.36141	NA	NA
2021-03-19 09:40:00	OP-200m	UA-UW	MC	451.591	69.441	12.2875	3.42428	0.227746	-16.7	0.003565	3.044	3.11	1.298	3.93	0.2	1.95222	78.7657	3.43142	964.4	-1.65	76.6185	422.56	0	NA	NA	NA	NA	0	NA	NA	NA	6.49238e-07	66221	1.35782	NA	NA
2021-03-19 09:40:00	OP-50m	UA-UW	MC	451.591	69.441	12.2875	3.42428	0.227746	-16.7	0.003565	3.044	3.11	1.298	3.93	0.2	1.95222	78.7657	3.43142	964.4	-1.65	76.6185	422.56	0	NA	NA	NA	NA	0	NA	NA	0.000551243	5.38528e-06	2929695	1.35087	-0.0848612	NA
2021-03-19 09:40:00	OP-UW	UA-UW	MC	451.591	69.441	12.2875	3.42428	0.227746	-16.7	0.003565	3.044	3.11	1.298	3.93	0.2	1.95222	78.7657	3.43142	964.4	-1.65	76.6185	422.56	0	NA	NA	NA	NA	0	NA	NA	0	NA	0	1.36386	NA	NA
2021-03-19 09:40:00	OP-100m	UA-50m	MC	451.591	77.88	13.1912	3.6564	0.275539	-22.2	0.007951	3.616	2.298	1.178	3.514	0.08	1.95222	78.7657	3.43142	964.4	-1.65	76.6185	422.56	0	NA	NA	NA	NA	0	NA	NA	NA	1.36778e-06	246624	1.37436	NA	NA
2021-03-19 09:40:00	OP-150m	UA-50m	MC	451.591	77.88	13.1912	3.6564	0.275539	-22.2	0.007951	3.616	2.298	1.178	3.514	0.08	1.95222	78.7657	3.43142	964.4	-1.65	76.6185	422.56	0	NA	NA	NA	NA	0	NA	NA	NA	1.41421e-07	8918	1.36141	NA	NA
2021-03-19 09:40:00	OP-200m	UA-50m	MC	451.591	77.88	13.1912	3.6564	0.275539	-22.2	0.007951	3.616	2.298	1.178	3.514	0.08	1.95222	78.7657	3.43142	964.4	-1.65	76.6185	422.56	0	NA	NA	NA	NA	0	NA	NA	NA	4.57938e-08	701	1.35782	NA	NA
2021-03-19 09:40:00	OP-50m	UA-50m	MC	451.591	77.88	13.1912	3.6564	0.275539	-22.2	0.007951	3.616	2.298	1.178	3.514	0.08	1.95222	78.7657	3.43142	964.4	-1.65	76.6185	422.56	0	NA	NA	NA	NA	0	NA	NA	0.000464364	4.53893e-06	2787509	1.35087	-0.100738	NA
2021-03-19 09:40:00	OP-UW	UA-50m	MC	451.591	77.88	13.1912	3.6564	0.275539	-22.2	0.007951	3.616	2.298	1.178	3.514	0.08	1.95222	78.7657	3.43142	964.4	-1.65	76.6185	422.56	0	NA	NA	NA	NA	0	NA	NA	0	NA	0	1.36386	NA	NA
2021-03-19 09:40:00	OP-100m	UA-100m	MC	451.591	74.722	10.5442	3.5892	0.261586	-17.5	0.006312	3.033	2.185	1.201	3.514	0.08	1.95222	78.7657	3.43142	964.4	-1.65	76.6185	422.56	0	NA	NA	NA	NA	0	NA	NA	NA	1.54977e-06	418306	1.37436	NA	NA
2021-03-19 09:40:00	OP-150m	UA-100m	MC	451.591	74.722	10.5442	3.5892	0.261586	-17.5	0.006312	3.033	2.185	1.201	3.514	0.08	1.95222	78.7657	3.43142	964.4	-1.65	76.6185	422.56	0	NA	NA	NA	NA	0	NA	NA	NA	1.36421e-07	8918	1.36141	NA	NA
2021-03-19 09:40:00	OP-200m	UA-100m	MC	451.591	74.722	10.5442	3.5892	0.261586	-17.5	0.006312	3.033	2.185	1.201	3.514	0.08	1.95222	78.7657	3.43142	964.4	-1.65	76.6185	422.56	0	NA	NA	NA	NA	0	NA	NA	NA	9.5482e-09	142	1.35782	NA	NA
2021-03-19 09:40:00	OP-50m	UA-100m	MC	451.591	74.722	10.5442	3.5892	0.261586	-17.5	0.006312	3.033	2.185	1.201	3.514	0.08	1.95222	78.7657	3.43142	964.4	-1.65	76.6185	422.56	0	NA	NA	NA	NA	0	NA	NA	0.000536012	4.96986e-06	3005942	1.35087	-0.0872726	NA
2021-03-19 09:40:00	OP-UW	UA-100m	MC	451.591	74.722	10.5442	3.5892	0.261586	-17.5	0.006312	3.033	2.185	1.201	3.514	0.08	1.95222	78.7657	3.43142	964.4	-1.65	76.6185	422.56	0	NA	NA	NA	NA	0	NA	NA	0	NA	0	1.36386	NA	NA
2021-03-19 09:40:00	OP-100m	UA-150m	MC	451.591	75.245	11.5726	3.74735	0.307835	-26.3	0.01277	2.654	2.09	1.166	3.518	0.08	1.95222	78.7657	3.43142	964.4	-1.65	76.6185	422.56	0	NA	NA	NA	NA	0	NA	NA	NA	1.19517e-06	441319	1.37436	NA	NA
2021-03-19 09:40:00	OP-150m	UA-150m	MC	451.591	75.245	11.5726	3.74735	0.307835	-26.3	0.01277	2.654	2.09	1.166	3.518	0.08	1.95222	78.7657	3.43142	964.4	-1.65	76.6185	422.56	0	NA	NA	NA	NA	0	NA	NA	NA	1.66837e-07	15781	1.36141	NA	NA
2021-03-19 09:40:00	OP-200m	UA-150m	MC	451.591	75.245	11.5726	3.74735	0.307835	-26.3	0.01277	2.654	2.09	1.166	3.518	0.08	1.95222	78.7657	3.43142	964.4	-1.65	76.6185	422.56	0	NA	NA	NA	NA	0	NA	NA	NA	5.76396e-08	1210	1.35782	NA	NA
2021-03-19 09:40:00	OP-50m	UA-150m	MC	451.591	75.245	11.5726	3.74735	0.307835	-26.3	0.01277	2.654	2.09	1.166	3.518	0.08	1.95222	78.7657	3.43142	964.4	-1.65	76.6185	422.56	0	NA	NA	NA	NA	0	NA	NA	0.000455354	4.10343e-06	3061366	1.35087	-0.102732	NA
2021-03-19 09:40:00	OP-UW	UA-150m	MC	451.591	75.245	11.5726	3.74735	0.307835	-26.3	0.01277	2.654	2.09	1.166	3.518	0.08	1.95222	78.7657	3.43142	964.4	-1.65	76.6185	422.56	0	NA	NA	NA	NA	0	NA	NA	0	NA	0	1.36386	NA	NA
2021-03-19 09:50:00	OP-100m	UA-UW	MC	451.591	63.423	20.6314	3.0876	0.258361	-18.7	0.0126	2.989	3.402	1.282	3.914	0.2	2.19815	68.291	3.2784	964.4	-1.62655	75.7633	446.662	0	NA	NA	NA	NA	0	NA	NA	0.000225171	3.03637e-06	1311298	1.36736	0.107623	NA
2021-03-19 09:50:00	OP-150m	UA-UW	MC	451.591	63.423	20.6314	3.0876	0.258361	-18.7	0.0126	2.989	3.402	1.282	3.914	0.2	2.19815	68.291	3.2784	964.4	-1.62655	75.7633	446.662	0	NA	NA	NA	NA	0	NA	NA	0.000103694	1.92827e-06	619734	1.35683	-0.131915	NA
2021-03-19 09:50:00	OP-200m	UA-UW	MC	451.591	63.423	20.6314	3.0876	0.258361	-18.7	0.0126	2.989	3.402	1.282	3.914	0.2	2.19815	68.291	3.2784	964.4	-1.62655	75.7633	446.662	0	NA	NA	NA	NA	0	NA	NA	NA	1.47734e-06	312492	1.36122	NA	NA
2021-03-19 09:50:00	OP-50m	UA-UW	MC	451.591	63.423	20.6314	3.0876	0.258361	-18.7	0.0126	2.989	3.402	1.282	3.914	0.2	2.19815	68.291	3.2784	964.4	-1.62655	75.7633	446.662	0	NA	NA	NA	NA	0	NA	NA	0.000502135	4.7616e-06	2902360	1.34744	-0.094556	NA
2021-03-19 09:50:00	OP-UW	UA-UW	MC	451.591	63.423	20.6314	3.0876	0.258361	-18.7	0.0126	2.989	3.402	1.282	3.914	0.2	2.19815	68.291	3.2784	964.4	-1.62655	75.7633	446.662	0	NA	NA	NA	NA	0	NA	NA	0	NA	0	1.36063	NA	NA
2021-03-19 09:50:00	OP-100m	UA-50m	MC	451.591	67.042	21.605	3.1227	0.187099	-9	0.001585	4.095	4.475	2.049	9.017	0.08	2.19815	68.291	3.2784	964.4	-1.62655	75.7633	446.662	0	NA	NA	NA	NA	0	NA	NA	0.00016299	2.84641e-06	1045064	1.36736	0.14868	NA
2021-03-19 09:50:00	OP-150m	UA-50m	MC	451.591	67.042	21.605	3.1227	0.187099	-9	0.001585	4.095	4.475	2.049	9.017	0.08	2.19815	68.291	3.2784	964.4	-1.62655	75.7633	446.662	0	NA	NA	NA	NA	0	NA	NA	NA	1.39319e-06	350183	1.35683	NA	NA
2021-03-19 09:50:00	OP-200m	UA-50m	MC	451.591	67.042	21.605	3.1227	0.187099	-9	0.001585	4.095	4.475	2.049	9.017	0.08	2.19815	68.291	3.2784	964.4	-1.62655	75.7633	446.662	0	NA	NA	NA	NA	0	NA	NA	NA	1.02265e-06	130498	1.36122	NA	NA
2021-03-19 09:50:00	OP-50m	UA-50m	MC	451.591	67.042	21.605	3.1227	0.187099	-9	0.001585	4.095	4.475	2.049	9.017	0.08	2.19815	68.291	3.2784	964.4	-1.62655	75.7633	446.662	0	NA	NA	NA	NA	0	NA	NA	0.000421649	4.64015e-06	2720563	1.34744	-0.112605	NA
2021-03-19 09:50:00	OP-UW	UA-50m	MC	451.591	67.042	21.605	3.1227	0.187099	-9	0.001585	4.095	4.475	2.049	9.017	0.08	2.19815	68.291	3.2784	964.4	-1.62655	75.7633	446.662	0	NA	NA	NA	NA	0	NA	NA	0	NA	0	1.36063	NA	NA
2021-03-19 09:50:00	OP-100m	UA-100m	MC	451.591	68.494	17.0887	3.12788	0.312416	-19.7	0.02869	2.441	2.652	1.084	3.163	0.08	2.19815	68.291	3.2784	964.4	-1.62655	75.7633	446.662	0	NA	NA	NA	NA	0	NA	NA	0.000170622	2.73335e-06	1053996	1.36736	0.14203	NA
2021-03-19 09:50:00	OP-150m	UA-100m	MC	451.591	68.494	17.0887	3.12788	0.312416	-19.7	0.02869	2.441	2.652	1.084	3.163	0.08	2.19815	68.291	3.2784	964.4	-1.62655	75.7633	446.662	0	NA	NA	NA	NA	0	NA	NA	NA	1.5051e-06	339404	1.35683	NA	NA
2021-03-19 09:50:00	OP-200m	UA-100m	MC	451.591	68.494	17.0887	3.12788	0.312416	-19.7	0.02869	2.441	2.652	1.084	3.163	0.08	2.19815	68.291	3.2784	964.4	-1.62655	75.7633	446.662	0	NA	NA	NA	NA	0	NA	NA	NA	9.20149e-07	117393	1.36122	NA	NA
2021-03-19 09:50:00	OP-50m	UA-100m	MC	451.591	68.494	17.0887	3.12788	0.312416	-19.7	0.02869	2.441	2.652	1.084	3.163	0.08	2.19815	68.291	3.2784	964.4	-1.62655	75.7633	446.662	0	NA	NA	NA	NA	0	NA	NA	0.000469846	4.4925e-06	2898019	1.34744	-0.101054	NA
2021-03-19 09:50:00	OP-UW	UA-100m	MC	451.591	68.494	17.0887	3.12788	0.312416	-19.7	0.02869	2.441	2.652	1.084	3.163	0.08	2.19815	68.291	3.2784	964.4	-1.62655	75.7633	446.662	0	NA	NA	NA	NA	0	NA	NA	0	NA	0	1.36063	NA	NA
2021-03-19 09:50:00	OP-100m	UA-150m	MC	451.591	69.393	16.9523	3.38442	0.22832	-11.9	0.003679	3.212	4.239	1.481	4.64	0.08	2.19815	68.291	3.2784	964.4	-1.62655	75.7633	446.662	0	NA	NA	NA	NA	0	NA	NA	0.000157004	2.48123e-06	938193	1.36736	0.15435	NA
2021-03-19 09:50:00	OP-150m	UA-150m	MC	451.591	69.393	16.9523	3.38442	0.22832	-11.9	0.003679	3.212	4.239	1.481	4.64	0.08	2.19815	68.291	3.2784	964.4	-1.62655	75.7633	446.662	0	NA	NA	NA	NA	0	NA	NA	NA	1.61096e-06	346205	1.35683	NA	NA
2021-03-19 09:50:00	OP-200m	UA-150m	MC	451.591	69.393	16.9523	3.38442	0.22832	-11.9	0.003679	3.212	4.239	1.481	4.64	0.08	2.19815	68.291	3.2784	964.4	-1.62655	75.7633	446.662	0	NA	NA	NA	NA	0	NA	NA	NA	1.16478e-06	143108	1.36122	NA	NA
2021-03-19 09:50:00	OP-50m	UA-150m	MC	451.591	69.393	16.9523	3.38442	0.22832	-11.9	0.003679	3.212	4.239	1.481	4.64	0.08	2.19815	68.291	3.2784	964.4	-1.62655	75.7633	446.662	0	NA	NA	NA	NA	0	NA	NA	0.000448656	4.59025e-06	2641514	1.34744	-0.105827	NA
2021-03-19 09:50:00	OP-UW	UA-150m	MC	451.591	69.393	16.9523	3.38442	0.22832	-11.9	0.003679	3.212	4.239	1.481	4.64	0.08	2.19815	68.291	3.2784	964.4	-1.62655	75.7633	446.662	0	NA	NA	NA	NA	0	NA	NA	0	NA	0	1.36063	NA	NA
2021-03-19 10:00:00	OP-100m	UA-UW	MC	451.591	32.147	16.7943	2.82767	0.262651	-17.2	0.01993	2.859	3.112	1.238	3.672	0.2	2.39673	44.9487	3.23876	964.363	-1.42655	75.9907	486.072	0	NA	NA	NA	NA	0	NA	NA	0.000257232	3.21075e-06	1499658	1.36848	-0.0460632	NA
2021-03-19 10:00:00	OP-150m	UA-UW	MC	451.591	32.147	16.7943	2.82767	0.262651	-17.2	0.01993	2.859	3.112	1.238	3.672	0.2	2.39673	44.9487	3.23876	964.363	-1.42655	75.9907	486.072	0	NA	NA	NA	NA	0	NA	NA	0.000140442	2.30343e-06	835792	1.35844	-0.341633	NA
2021-03-19 10:00:00	OP-200m	UA-UW	MC	451.591	32.147	16.7943	2.82767	0.262651	-17.2	0.01993	2.859	3.112	1.238	3.672	0.2	2.39673	44.9487	3.23876	964.363	-1.42655	75.9907	486.072	0	NA	NA	NA	NA	0	NA	NA	8.32748e-05	1.82721e-06	484771	1.36508	-0.289056	NA
2021-03-19 10:00:00	OP-50m	UA-UW	MC	451.591	32.147	16.7943	2.82767	0.262651	-17.2	0.01993	2.859	3.112	1.238	3.672	0.2	2.39673	44.9487	3.23876	964.363	-1.42655	75.9907	486.072	0	NA	NA	NA	NA	0	NA	NA	0.000516101	4.81752e-06	2996886	1.35847	-0.0927566	NA
2021-03-19 10:00:00	OP-UW	UA-UW	MC	451.591	32.147	16.7943	2.82767	0.262651	-17.2	0.01993	2.859	3.112	1.238	3.672	0.2	2.39673	44.9487	3.23876	964.363	-1.42655	75.9907	486.072	0	NA	NA	NA	NA	0	NA	NA	0	NA	0	1.37177	NA	NA
2021-03-19 10:00:00	OP-100m	UA-50m	MC	451.591	32.4	16.7094	2.75761	0.176882	-7.8	0.002356	4.4	4.309	2.249	10.916	0.08	2.39673	44.9487	3.23876	964.363	-1.42655	75.9907	486.072	0	NA	NA	NA	NA	0	NA	NA	0.000205431	3.33476e-06	1326071	1.36848	-0.0576785	NA
2021-03-19 10:00:00	OP-150m	UA-50m	MC	451.591	32.4	16.7094	2.75761	0.176882	-7.8	0.002356	4.4	4.309	2.249	10.916	0.08	2.39673	44.9487	3.23876	964.363	-1.42655	75.9907	486.072	0	NA	NA	NA	NA	0	NA	NA	0.000103698	1.93882e-06	697236	1.35844	-0.462684	NA
2021-03-19 10:00:00	OP-200m	UA-50m	MC	451.591	32.4	16.7094	2.75761	0.176882	-7.8	0.002356	4.4	4.309	2.249	10.916	0.08	2.39673	44.9487	3.23876	964.363	-1.42655	75.9907	486.072	0	NA	NA	NA	NA	0	NA	NA	5.85378e-05	2.068e-06	376472	1.36508	-0.411206	NA
2021-03-19 10:00:00	OP-50m	UA-50m	MC	451.591	32.4	16.7094	2.75761	0.176882	-7.8	0.002356	4.4	4.309	2.249	10.916	0.08	2.39673	44.9487	3.23876	964.363	-1.42655	75.9907	486.072	0	NA	NA	NA	NA	0	NA	NA	0.00042451	4.28242e-06	2749579	1.35847	-0.112769	NA
2021-03-19 10:00:00	OP-UW	UA-50m	MC	451.591	32.4	16.7094	2.75761	0.176882	-7.8	0.002356	4.4	4.309	2.249	10.916	0.08	2.39673	44.9487	3.23876	964.363	-1.42655	75.9907	486.072	0	NA	NA	NA	NA	0	NA	NA	0	NA	0	1.37177	NA	NA
2021-03-19 10:00:00	OP-100m	UA-100m	MC	451.591	35.768	16.3249	2.92515	0.242776	-13.8	0.01159	3.279	3.083	1.259	3.63	0.08	2.39673	44.9487	3.23876	964.363	-1.42655	75.9907	486.072	0	NA	NA	NA	NA	0	NA	NA	0.000297068	3.64382e-06	1610080	1.36848	-0.0398863	NA
2021-03-19 10:00:00	OP-150m	UA-100m	MC	451.591	35.768	16.3249	2.92515	0.242776	-13.8	0.01159	3.279	3.083	1.259	3.63	0.08	2.39673	44.9487	3.23876	964.363	-1.42655	75.9907	486.072	0	NA	NA	NA	NA	0	NA	NA	0.000181046	5.03347e-06	957534	1.35844	-0.265013	NA
2021-03-19 10:00:00	OP-200m	UA-100m	MC	451.591	35.768	16.3249	2.92515	0.242776	-13.8	0.01159	3.279	3.083	1.259	3.63	0.08	2.39673	44.9487	3.23876	964.363	-1.42655	75.9907	486.072	0	NA	NA	NA	NA	0	NA	NA	0.000105487	2.17546e-06	580496	1.36508	-0.22819	NA
2021-03-19 10:00:00	OP-50m	UA-100m	MC	451.591	35.768	16.3249	2.92515	0.242776	-13.8	0.01159	3.279	3.083	1.259	3.63	0.08	2.39673	44.9487	3.23876	964.363	-1.42655	75.9907	486.072	0	NA	NA	NA	NA	0	NA	NA	0.000540878	5.32101e-06	2916624	1.35847	-0.0885074	NA
2021-03-19 10:00:00	OP-UW	UA-100m	MC	451.591	35.768	16.3249	2.92515	0.242776	-13.8	0.01159	3.279	3.083	1.259	3.63	0.08	2.39673	44.9487	3.23876	964.363	-1.42655	75.9907	486.072	0	NA	NA	NA	NA	0	NA	NA	0	NA	0	1.37177	NA	NA
2021-03-19 10:00:00	OP-100m	UA-150m	MC	451.591	36.587	17.717	2.91383	0.295973	-15.8	0.02912	2.68	2.599	1.175	3.376	0.08	2.39673	44.9487	3.23876	964.363	-1.42655	75.9907	486.072	0	NA	NA	NA	NA	0	NA	NA	0.000260722	3.43174e-06	1597350	1.36848	-0.0454466	NA
2021-03-19 10:00:00	OP-150m	UA-150m	MC	451.591	36.587	17.717	2.91383	0.295973	-15.8	0.02912	2.68	2.599	1.175	3.376	0.08	2.39673	44.9487	3.23876	964.363	-1.42655	75.9907	486.072	0	NA	NA	NA	NA	0	NA	NA	0.000157104	2.56246e-06	975021	1.35844	-0.305399	NA
2021-03-19 10:00:00	OP-200m	UA-150m	MC	451.591	36.587	17.717	2.91383	0.295973	-15.8	0.02912	2.68	2.599	1.175	3.376	0.08	2.39673	44.9487	3.23876	964.363	-1.42655	75.9907	486.072	0	NA	NA	NA	NA	0	NA	NA	9.92592e-05	1.79762e-06	632248	1.36508	-0.242507	NA
2021-03-19 10:00:00	OP-50m	UA-150m	MC	451.591	36.587	17.717	2.91383	0.295973	-15.8	0.02912	2.68	2.599	1.175	3.376	0.08	2.39673	44.9487	3.23876	964.363	-1.42655	75.9907	486.072	0	NA	NA	NA	NA	0	NA	NA	0.000474346	4.20564e-06	2956068	1.35847	-0.100921	NA
2021-03-19 10:00:00	OP-UW	UA-150m	MC	451.591	36.587	17.717	2.91383	0.295973	-15.8	0.02912	2.68	2.599	1.175	3.376	0.08	2.39673	44.9487	3.23876	964.363	-1.42655	75.9907	486.072	0	NA	NA	NA	NA	0	NA	NA	0	NA	0	1.37177	NA	NA
2021-03-19 10:10:00	OP-100m	UA-UW	MC	451.591	23.966	16.8662	2.45805	0.222205	-12.1	0.0162	3.545	3.092	1.327	3.871	0.2	2.43	27.5978	3.04309	964.3	-1.17655	77.1673	494.53	0	NA	NA	NA	NA	0	NA	NA	0.000201639	2.89715e-06	1045430	1.38092	-0.146759	NA
2021-03-19 10:10:00	OP-150m	UA-UW	MC	451.591	23.966	16.8662	2.45805	0.222205	-12.1	0.0162	3.545	3.092	1.327	3.871	0.2	2.43	27.5978	3.04309	964.3	-1.17655	77.1673	494.53	0	NA	NA	NA	NA	0	NA	NA	NA	1.78528e-06	401160	1.3723	NA	NA
2021-03-19 10:10:00	OP-200m	UA-UW	MC	451.591	23.966	16.8662	2.45805	0.222205	-12.1	0.0162	3.545	3.092	1.327	3.871	0.2	2.43	27.5978	3.04309	964.3	-1.17655	77.1673	494.53	0	NA	NA	NA	NA	0	NA	NA	NA	1.11126e-06	157462	1.38219	NA	NA
2021-03-19 10:10:00	OP-50m	UA-UW	MC	451.591	23.966	16.8662	2.45805	0.222205	-12.1	0.0162	3.545	3.092	1.327	3.871	0.2	2.43	27.5978	3.04309	964.3	-1.17655	77.1673	494.53	0	NA	NA	NA	NA	0	NA	NA	0.000524807	4.98207e-06	2691960	1.3789	-0.0702755	NA
2021-03-19 10:10:00	OP-UW	UA-UW	MC	451.591	23.966	16.8662	2.45805	0.222205	-12.1	0.0162	3.545	3.092	1.327	3.871	0.2	2.43	27.5978	3.04309	964.3	-1.17655	77.1673	494.53	0	NA	NA	NA	NA	0	NA	NA	0	NA	0	1.38914	NA	NA
2021-03-19 10:10:00	OP-100m	UA-50m	MC	451.591	23.604	14.4029	2.56406	0.157458	-5.1	0.001538	3.682	3.726	1.936	6.268	0.08	2.43	27.5978	3.04309	964.3	-1.17655	77.1673	494.53	0	NA	NA	NA	NA	0	NA	NA	0.000190494	3.6422e-06	887825	1.38092	-0.155345	NA
2021-03-19 10:10:00	OP-150m	UA-50m	MC	451.591	23.604	14.4029	2.56406	0.157458	-5.1	0.001538	3.682	3.726	1.936	6.268	0.08	2.43	27.5978	3.04309	964.3	-1.17655	77.1673	494.53	0	NA	NA	NA	NA	0	NA	NA	NA	1.74428e-06	276106	1.3723	NA	NA
2021-03-19 10:10:00	OP-200m	UA-50m	MC	451.591	23.604	14.4029	2.56406	0.157458	-5.1	0.001538	3.682	3.726	1.936	6.268	0.08	2.43	27.5978	3.04309	964.3	-1.17655	77.1673	494.53	0	NA	NA	NA	NA	0	NA	NA	NA	8.92845e-07	84559	1.38219	NA	NA
2021-03-19 10:10:00	OP-50m	UA-50m	MC	451.591	23.604	14.4029	2.56406	0.157458	-5.1	0.001538	3.682	3.726	1.936	6.268	0.08	2.43	27.5978	3.04309	964.3	-1.17655	77.1673	494.53	0	NA	NA	NA	NA	0	NA	NA	0.000511771	5.51207e-06	2375632	1.3789	-0.0720655	NA
2021-03-19 10:10:00	OP-UW	UA-50m	MC	451.591	23.604	14.4029	2.56406	0.157458	-5.1	0.001538	3.682	3.726	1.936	6.268	0.08	2.43	27.5978	3.04309	964.3	-1.17655	77.1673	494.53	0	NA	NA	NA	NA	0	NA	NA	0	NA	0	1.38914	NA	NA
2021-03-19 10:10:00	OP-100m	UA-100m	MC	451.591	24.974	13.7585	2.63912	0.23065	-9.4	0.01326	3.115	2.646	1.189	3.206	0.08	2.43	27.5978	3.04309	964.3	-1.17655	77.1673	494.53	0	NA	NA	NA	NA	0	NA	NA	0.000245102	3.84926e-06	1134607	1.38092	-0.120735	NA
2021-03-19 10:10:00	OP-150m	UA-100m	MC	451.591	24.974	13.7585	2.63912	0.23065	-9.4	0.01326	3.115	2.646	1.189	3.206	0.08	2.43	27.5978	3.04309	964.3	-1.17655	77.1673	494.53	0	NA	NA	NA	NA	0	NA	NA	NA	4.63994e-06	394386	1.3723	NA	NA
2021-03-19 10:10:00	OP-200m	UA-100m	MC	451.591	24.974	13.7585	2.63912	0.23065	-9.4	0.01326	3.115	2.646	1.189	3.206	0.08	2.43	27.5978	3.04309	964.3	-1.17655	77.1673	494.53	0	NA	NA	NA	NA	0	NA	NA	NA	1.12325e-06	138992	1.38219	NA	NA
2021-03-19 10:10:00	OP-50m	UA-100m	MC	451.591	24.974	13.7585	2.63912	0.23065	-9.4	0.01326	3.115	2.646	1.189	3.206	0.08	2.43	27.5978	3.04309	964.3	-1.17655	77.1673	494.53	0	NA	NA	NA	NA	0	NA	NA	0.000587953	6.5581e-06	2694700	1.3789	-0.0627279	NA
2021-03-19 10:10:00	OP-UW	UA-100m	MC	451.591	24.974	13.7585	2.63912	0.23065	-9.4	0.01326	3.115	2.646	1.189	3.206	0.08	2.43	27.5978	3.04309	964.3	-1.17655	77.1673	494.53	0	NA	NA	NA	NA	0	NA	NA	0	NA	0	1.38914	NA	NA
2021-03-19 10:10:00	OP-100m	UA-150m	MC	451.591	22.955	13.6643	2.66169	0.188334	-5.8	0.003779	3.643	3.321	1.53	4.081	0.08	2.43	27.5978	3.04309	964.3	-1.17655	77.1673	494.53	0	NA	NA	NA	NA	0	NA	NA	0.000188334	3.60191e-06	862273	1.38092	-0.157126	NA
2021-03-19 10:10:00	OP-150m	UA-150m	MC	451.591	22.955	13.6643	2.66169	0.188334	-5.8	0.003779	3.643	3.321	1.53	4.081	0.08	2.43	27.5978	3.04309	964.3	-1.17655	77.1673	494.53	0	NA	NA	NA	NA	0	NA	NA	NA	1.95151e-06	268105	1.3723	NA	NA
2021-03-19 10:10:00	OP-200m	UA-150m	MC	451.591	22.955	13.6643	2.66169	0.188334	-5.8	0.003779	3.643	3.321	1.53	4.081	0.08	2.43	27.5978	3.04309	964.3	-1.17655	77.1673	494.53	0	NA	NA	NA	NA	0	NA	NA	NA	8.93368e-07	88563	1.38219	NA	NA
2021-03-19 10:10:00	OP-50m	UA-150m	MC	451.591	22.955	13.6643	2.66169	0.188334	-5.8	0.003779	3.643	3.321	1.53	4.081	0.08	2.43	27.5978	3.04309	964.3	-1.17655	77.1673	494.53	0	NA	NA	NA	NA	0	NA	NA	0.000525229	5.95633e-06	2344998	1.3789	-0.070219	NA
2021-03-19 10:10:00	OP-UW	UA-150m	MC	451.591	22.955	13.6643	2.66169	0.188334	-5.8	0.003779	3.643	3.321	1.53	4.081	0.08	2.43	27.5978	3.04309	964.3	-1.17655	77.1673	494.53	0	NA	NA	NA	NA	0	NA	NA	0	NA	0	1.38914	NA	NA
2021-03-19 10:20:00	OP-100m	UA-UW	MC	451.591	19.217	13.2279	3.06669	0.280304	-16.9	0.01849	2.89	2.378	1.141	3.302	0.2	2.54345	22.1557	3.0716	964.3	-0.803092	78.5602	463.354	0	7.55155	0	0	0	0	3.67703	0.0295135	NA	2.32648e-06	852720	1.38486	NA	NA
2021-03-19 10:20:00	OP-150m	UA-UW	MC	451.591	19.217	13.2279	3.06669	0.280304	-16.9	0.01849	2.89	2.378	1.141	3.302	0.2	2.54345	22.1557	3.0716	964.3	-0.803092	78.5602	463.354	0	7.55155	0	0	0	0	3.67703	0.0295135	NA	8.8153e-07	146606	1.38015	NA	NA
2021-03-19 10:20:00	OP-200m	UA-UW	MC	451.591	19.217	13.2279	3.06669	0.280304	-16.9	0.01849	2.89	2.378	1.141	3.302	0.2	2.54345	22.1557	3.0716	964.3	-0.803092	78.5602	463.354	0	7.55155	0	0	0	0	3.67703	0.0295135	NA	4.44204e-07	29418	1.38395	NA	NA
2021-03-19 10:20:00	OP-50m	UA-UW	MC	451.591	19.217	13.2279	3.06669	0.280304	-16.9	0.01849	2.89	2.378	1.141	3.302	0.2	2.54345	22.1557	3.0716	964.3	-0.803092	78.5602	463.354	0	7.55155	0	0	0	0	3.67703	0.0295135	NA	4.63102e-06	2922455	1.38208	NA	NA
2021-03-19 10:20:00	OP-UW	UA-UW	MC	451.591	19.217	13.2279	3.06669	0.280304	-16.9	0.01849	2.89	2.378	1.141	3.302	0.2	2.54345	22.1557	3.0716	964.3	-0.803092	78.5602	463.354	0	7.55155	0	0	0	0	3.67703	0.0295135	0	NA	0	1.39049	NA	NA
2021-03-19 10:20:00	OP-100m	UA-50m	MC	451.591	15.762	14.046	3.20455	0.250922	-12.4	0.008454	2.766	3.176	1.352	3.979	0.08	2.54345	22.1557	3.0716	964.3	-0.803092	78.5602	463.354	0	7.55155	0	0	0	0	3.67703	0.0295135	NA	1.97199e-06	581321	1.38486	NA	NA
2021-03-19 10:20:00	OP-150m	UA-50m	MC	451.591	15.762	14.046	3.20455	0.250922	-12.4	0.008454	2.766	3.176	1.352	3.979	0.08	2.54345	22.1557	3.0716	964.3	-0.803092	78.5602	463.354	0	7.55155	0	0	0	0	3.67703	0.0295135	NA	7.96e-07	111759	1.38015	NA	NA
2021-03-19 10:20:00	OP-200m	UA-50m	MC	451.591	15.762	14.046	3.20455	0.250922	-12.4	0.008454	2.766	3.176	1.352	3.979	0.08	2.54345	22.1557	3.0716	964.3	-0.803092	78.5602	463.354	0	7.55155	0	0	0	0	3.67703	0.0295135	NA	3.46117e-07	24302	1.38395	NA	NA
2021-03-19 10:20:00	OP-50m	UA-50m	MC	451.591	15.762	14.046	3.20455	0.250922	-12.4	0.008454	2.766	3.176	1.352	3.979	0.08	2.54345	22.1557	3.0716	964.3	-0.803092	78.5602	463.354	0	7.55155	0	0	0	0	3.67703	0.0295135	NA	4.06619e-06	2497322	1.38208	NA	NA
2021-03-19 10:20:00	OP-UW	UA-50m	MC	451.591	15.762	14.046	3.20455	0.250922	-12.4	0.008454	2.766	3.176	1.352	3.979	0.08	2.54345	22.1557	3.0716	964.3	-0.803092	78.5602	463.354	0	7.55155	0	0	0	0	3.67703	0.0295135	0	NA	0	1.39049	NA	NA
2021-03-19 10:20:00	OP-100m	UA-100m	MC	451.591	17.398	11.8617	3.28778	0.243072	-12.6	0.006284	3.237	2.659	1.149	3.21	0.08	2.54345	22.1557	3.0716	964.3	-0.803092	78.5602	463.354	0	7.55155	0	0	0	0	3.67703	0.0295135	NA	2.4346e-06	673403	1.38486	NA	NA
2021-03-19 10:20:00	OP-150m	UA-100m	MC	451.591	17.398	11.8617	3.28778	0.243072	-12.6	0.006284	3.237	2.659	1.149	3.21	0.08	2.54345	22.1557	3.0716	964.3	-0.803092	78.5602	463.354	0	7.55155	0	0	0	0	3.67703	0.0295135	NA	8.72241e-07	90974	1.38015	NA	NA
2021-03-19 10:20:00	OP-200m	UA-100m	MC	451.591	17.398	11.8617	3.28778	0.243072	-12.6	0.006284	3.237	2.659	1.149	3.21	0.08	2.54345	22.1557	3.0716	964.3	-0.803092	78.5602	463.354	0	7.55155	0	0	0	0	3.67703	0.0295135	NA	7.09766e-07	17646	1.38395	NA	NA
2021-03-19 10:20:00	OP-50m	UA-100m	MC	451.591	17.398	11.8617	3.28778	0.243072	-12.6	0.006284	3.237	2.659	1.149	3.21	0.08	2.54345	22.1557	3.0716	964.3	-0.803092	78.5602	463.354	0	7.55155	0	0	0	0	3.67703	0.0295135	NA	6.99411e-06	2774679	1.38208	NA	NA
2021-03-19 10:20:00	OP-UW	UA-100m	MC	451.591	17.398	11.8617	3.28778	0.243072	-12.6	0.006284	3.237	2.659	1.149	3.21	0.08	2.54345	22.1557	3.0716	964.3	-0.803092	78.5602	463.354	0	7.55155	0	0	0	0	3.67703	0.0295135	0	NA	0	1.39049	NA	NA
2021-03-19 10:20:00	OP-100m	UA-150m	MC	451.591	19.428	12.8737	3.16414	0.297399	-16.2	0.02129	2.559	2.281	1.121	3.213	0.08	2.54345	22.1557	3.0716	964.3	-0.803092	78.5602	463.354	0	7.55155	0	0	0	0	3.67703	0.0295135	NA	1.97788e-06	852198	1.38486	NA	NA
2021-03-19 10:20:00	OP-150m	UA-150m	MC	451.591	19.428	12.8737	3.16414	0.297399	-16.2	0.02129	2.559	2.281	1.121	3.213	0.08	2.54345	22.1557	3.0716	964.3	-0.803092	78.5602	463.354	0	7.55155	0	0	0	0	3.67703	0.0295135	NA	8.92255e-07	149150	1.38015	NA	NA
2021-03-19 10:20:00	OP-200m	UA-150m	MC	451.591	19.428	12.8737	3.16414	0.297399	-16.2	0.02129	2.559	2.281	1.121	3.213	0.08	2.54345	22.1557	3.0716	964.3	-0.803092	78.5602	463.354	0	7.55155	0	0	0	0	3.67703	0.0295135	NA	3.37198e-07	23529	1.38395	NA	NA
2021-03-19 10:20:00	OP-50m	UA-150m	MC	451.591	19.428	12.8737	3.16414	0.297399	-16.2	0.02129	2.559	2.281	1.121	3.213	0.08	2.54345	22.1557	3.0716	964.3	-0.803092	78.5602	463.354	0	7.55155	0	0	0	0	3.67703	0.0295135	NA	4.59389e-06	2887050	1.38208	NA	NA
2021-03-19 10:20:00	OP-UW	UA-150m	MC	451.591	19.428	12.8737	3.16414	0.297399	-16.2	0.02129	2.559	2.281	1.121	3.213	0.08	2.54345	22.1557	3.0716	964.3	-0.803092	78.5602	463.354	0	7.55155	0	0	0	0	3.67703	0.0295135	0	NA	0	1.39049	NA	NA
2021-03-19 10:30:00	OP-100m	UA-UW	MC	451.591	15.234	10.8322	2.89066	0.197089	-9.5	0.003532	2.966	2.854	1.573	4.998	0.2	2.56327	22.8031	3.29327	964.263	-0.910181	77.7898	379.402	0	7.58679	117.244	117.82	5.06861	5.06861	3.47963	162.746	NA	1.71046e-06	391398	1.4358	NA	NA
2021-03-19 10:30:00	OP-150m	UA-UW	MC	451.591	15.234	10.8322	2.89066	0.197089	-9.5	0.003532	2.966	2.854	1.573	4.998	0.2	2.56327	22.8031	3.29327	964.263	-0.910181	77.7898	379.402	0	7.58679	117.244	117.82	5.06861	5.06861	3.47963	162.746	NA	4.28571e-07	31171	1.38822	NA	NA
2021-03-19 10:30:00	OP-200m	UA-UW	MC	451.591	15.234	10.8322	2.89066	0.197089	-9.5	0.003532	2.966	2.854	1.573	4.998	0.2	2.56327	22.8031	3.29327	964.263	-0.910181	77.7898	379.402	0	7.58679	117.244	117.82	5.06861	5.06861	3.47963	162.746	NA	8.27761e-08	2593	1.38154	NA	NA
2021-03-19 10:30:00	OP-50m	UA-UW	MC	451.591	15.234	10.8322	2.89066	0.197089	-9.5	0.003532	2.966	2.854	1.573	4.998	0.2	2.56327	22.8031	3.29327	964.263	-0.910181	77.7898	379.402	0	7.58679	117.244	117.82	5.06861	5.06861	3.47963	162.746	NA	5.40744e-06	2596641	1.71915	NA	NA
2021-03-19 10:30:00	OP-UW	UA-UW	MC	451.591	15.234	10.8322	2.89066	0.197089	-9.5	0.003532	2.966	2.854	1.573	4.998	0.2	2.56327	22.8031	3.29327	964.263	-0.910181	77.7898	379.402	0	7.58679	117.244	117.82	5.06861	5.06861	3.47963	162.746	0	NA	0	1.38593	NA	NA
2021-03-19 10:30:00	OP-100m	UA-50m	MC	451.591	18.494	11.7262	2.91126	0.215159	-12	0.006173	2.725	2.775	1.401	4.199	0.08	2.56327	22.8031	3.29327	964.263	-0.910181	77.7898	379.402	0	7.58679	117.244	117.82	5.06861	5.06861	3.47963	162.746	NA	2.4035e-06	734963	1.4358	NA	NA
2021-03-19 10:30:00	OP-150m	UA-50m	MC	451.591	18.494	11.7262	2.91126	0.215159	-12	0.006173	2.725	2.775	1.401	4.199	0.08	2.56327	22.8031	3.29327	964.263	-0.910181	77.7898	379.402	0	7.58679	117.244	117.82	5.06861	5.06861	3.47963	162.746	NA	8.13195e-07	107240	1.38822	NA	NA
2021-03-19 10:30:00	OP-200m	UA-50m	MC	451.591	18.494	11.7262	2.91126	0.215159	-12	0.006173	2.725	2.775	1.401	4.199	0.08	2.56327	22.8031	3.29327	964.263	-0.910181	77.7898	379.402	0	7.58679	117.244	117.82	5.06861	5.06861	3.47963	162.746	NA	3.1995e-07	17630	1.38154	NA	NA
2021-03-19 10:30:00	OP-50m	UA-50m	MC	451.591	18.494	11.7262	2.91126	0.215159	-12	0.006173	2.725	2.775	1.401	4.199	0.08	2.56327	22.8031	3.29327	964.263	-0.910181	77.7898	379.402	0	7.58679	117.244	117.82	5.06861	5.06861	3.47963	162.746	NA	5.30888e-06	2831610	1.71915	NA	NA
2021-03-19 10:30:00	OP-UW	UA-50m	MC	451.591	18.494	11.7262	2.91126	0.215159	-12	0.006173	2.725	2.775	1.401	4.199	0.08	2.56327	22.8031	3.29327	964.263	-0.910181	77.7898	379.402	0	7.58679	117.244	117.82	5.06861	5.06861	3.47963	162.746	0	NA	0	1.38593	NA	NA
2021-03-19 10:30:00	OP-100m	UA-100m	MC	451.591	19.16	14.0491	2.99757	0.264971	-18	0.01666	2.481	2.581	1.057	3.072	0.08	2.56327	22.8031	3.29327	964.263	-0.910181	77.7898	379.402	0	7.58679	117.244	117.82	5.06861	5.06861	3.47963	162.746	NA	4.0166e-06	882293	1.4358	NA	NA
2021-03-19 10:30:00	OP-150m	UA-100m	MC	451.591	19.16	14.0491	2.99757	0.264971	-18	0.01666	2.481	2.581	1.057	3.072	0.08	2.56327	22.8031	3.29327	964.263	-0.910181	77.7898	379.402	0	7.58679	117.244	117.82	5.06861	5.06861	3.47963	162.746	NA	1.76904e-06	192749	1.38822	NA	NA
2021-03-19 10:30:00	OP-200m	UA-100m	MC	451.591	19.16	14.0491	2.99757	0.264971	-18	0.01666	2.481	2.581	1.057	3.072	0.08	2.56327	22.8031	3.29327	964.263	-0.910181	77.7898	379.402	0	7.58679	117.244	117.82	5.06861	5.06861	3.47963	162.746	NA	6.96138e-07	40894	1.38154	NA	NA
2021-03-19 10:30:00	OP-50m	UA-100m	MC	451.591	19.16	14.0491	2.99757	0.264971	-18	0.01666	2.481	2.581	1.057	3.072	0.08	2.56327	22.8031	3.29327	964.263	-0.910181	77.7898	379.402	0	7.58679	117.244	117.82	5.06861	5.06861	3.47963	162.746	NA	5.27915e-06	2902910	1.71915	NA	NA
2021-03-19 10:30:00	OP-UW	UA-100m	MC	451.591	19.16	14.0491	2.99757	0.264971	-18	0.01666	2.481	2.581	1.057	3.072	0.08	2.56327	22.8031	3.29327	964.263	-0.910181	77.7898	379.402	0	7.58679	117.244	117.82	5.06861	5.06861	3.47963	162.746	0	NA	0	1.38593	NA	NA
2021-03-19 10:30:00	OP-100m	UA-150m	MC	451.591	20.254	14.4044	3.01092	0.286601	-24.5	0.02458	2.506	2.293	1.104	3.277	0.08	2.56327	22.8031	3.29327	964.263	-0.910181	77.7898	379.402	0	7.58679	117.244	117.82	5.06861	5.06861	3.47963	162.746	NA	2.35713e-06	1025068	1.4358	NA	NA
2021-03-19 10:30:00	OP-150m	UA-150m	MC	451.591	20.254	14.4044	3.01092	0.286601	-24.5	0.02458	2.506	2.293	1.104	3.277	0.08	2.56327	22.8031	3.29327	964.263	-0.910181	77.7898	379.402	0	7.58679	117.244	117.82	5.06861	5.06861	3.47963	162.746	NA	9.74462e-07	197915	1.38822	NA	NA
2021-03-19 10:30:00	OP-200m	UA-150m	MC	451.591	20.254	14.4044	3.01092	0.286601	-24.5	0.02458	2.506	2.293	1.104	3.277	0.08	2.56327	22.8031	3.29327	964.263	-0.910181	77.7898	379.402	0	7.58679	117.244	117.82	5.06861	5.06861	3.47963	162.746	NA	4.51878e-07	40074	1.38154	NA	NA
2021-03-19 10:30:00	OP-50m	UA-150m	MC	451.591	20.254	14.4044	3.01092	0.286601	-24.5	0.02458	2.506	2.293	1.104	3.277	0.08	2.56327	22.8031	3.29327	964.263	-0.910181	77.7898	379.402	0	7.58679	117.244	117.82	5.06861	5.06861	3.47963	162.746	NA	4.757e-06	3122693	1.71915	NA	NA
2021-03-19 10:30:00	OP-UW	UA-150m	MC	451.591	20.254	14.4044	3.01092	0.286601	-24.5	0.02458	2.506	2.293	1.104	3.277	0.08	2.56327	22.8031	3.29327	964.263	-0.910181	77.7898	379.402	0	7.58679	117.244	117.82	5.06861	5.06861	3.47963	162.746	0	NA	0	1.38593	NA	NA
2021-03-19 10:40:00	OP-100m	UA-UW	MC	451.591	24.624	11.5583	3.28583	0.258613	-23.6	0.0098	2.465	2.383	1.235	3.794	0.2	2.65611	19.0349	3.51302	964.237	-0.95	76.9358	343.859	0	11.3586	140	139.999	6.02275	6.02275	2.79047	177.544	0.000257583	3.10169e-06	1541735	1.56583	2.60412	0.432381
2021-03-19 10:40:00	OP-150m	UA-UW	MC	451.591	24.624	11.5583	3.28583	0.258613	-23.6	0.0098	2.465	2.383	1.235	3.794	0.2	2.65611	19.0349	3.51302	964.237	-0.95	76.9358	343.859	0	11.3586	140	139.999	6.02275	6.02275	2.79047	177.544	NA	1.80484e-06	469632	1.42595	NA	NA
2021-03-19 10:40:00	OP-200m	UA-UW	MC	451.591	24.624	11.5583	3.28583	0.258613	-23.6	0.0098	2.465	2.383	1.235	3.794	0.2	2.65611	19.0349	3.51302	964.237	-0.95	76.9358	343.859	0	11.3586	140	139.999	6.02275	6.02275	2.79047	177.544	NA	8.16193e-07	119908	1.38822	NA	NA
2021-03-19 10:40:00	OP-50m	UA-UW	MC	451.591	24.624	11.5583	3.28583	0.258613	-23.6	0.0098	2.465	2.383	1.235	3.794	0.2	2.65611	19.0349	3.51302	964.237	-0.95	76.9358	343.859	0	11.3586	140	139.999	6.02275	6.02275	2.79047	177.544	0.000545733	6.36413e-06	3215525	1.94835	3.75249	0.623053
2021-03-19 10:40:00	OP-UW	UA-UW	MC	451.591	24.624	11.5583	3.28583	0.258613	-23.6	0.0098	2.465	2.383	1.235	3.794	0.2	2.65611	19.0349	3.51302	964.237	-0.95	76.9358	343.859	0	11.3586	140	139.999	6.02275	6.02275	2.79047	177.544	0	NA	0	1.3795	NA	NA
2021-03-19 10:40:00	OP-100m	UA-50m	MC	451.591	22.079	12.2459	3.22781	0.288852	-28.6	0.01932	2.521	2.306	1.122	3.376	0.08	2.65611	19.0349	3.51302	964.237	-0.95	76.9358	343.859	0	11.3586	140	139.999	6.02275	6.02275	2.79047	177.544	0.00020689	2.85593e-06	1273385	1.56583	3.24219	0.538324
2021-03-19 10:40:00	OP-150m	UA-50m	MC	451.591	22.079	12.2459	3.22781	0.288852	-28.6	0.01932	2.521	2.306	1.122	3.376	0.08	2.65611	19.0349	3.51302	964.237	-0.95	76.9358	343.859	0	11.3586	140	139.999	6.02275	6.02275	2.79047	177.544	NA	1.19417e-06	294909	1.42595	NA	NA
2021-03-19 10:40:00	OP-200m	UA-50m	MC	451.591	22.079	12.2459	3.22781	0.288852	-28.6	0.01932	2.521	2.306	1.122	3.376	0.08	2.65611	19.0349	3.51302	964.237	-0.95	76.9358	343.859	0	11.3586	140	139.999	6.02275	6.02275	2.79047	177.544	NA	8.75597e-07	64831	1.38822	NA	NA
2021-03-19 10:40:00	OP-50m	UA-50m	MC	451.591	22.079	12.2459	3.22781	0.288852	-28.6	0.01932	2.521	2.306	1.122	3.376	0.08	2.65611	19.0349	3.51302	964.237	-0.95	76.9358	343.859	0	11.3586	140	139.999	6.02275	6.02275	2.79047	177.544	0.00053384	4.96299e-06	3223611	1.94835	3.83609	0.636934
2021-03-19 10:40:00	OP-UW	UA-50m	MC	451.591	22.079	12.2459	3.22781	0.288852	-28.6	0.01932	2.521	2.306	1.122	3.376	0.08	2.65611	19.0349	3.51302	964.237	-0.95	76.9358	343.859	0	11.3586	140	139.999	6.02275	6.02275	2.79047	177.544	0	NA	0	1.3795	NA	NA
2021-03-19 10:40:00	OP-100m	UA-100m	MC	451.591	21.711	12.4539	3.38765	0.28056	-23.2	0.01297	2.494	2.468	1.046	3.096	0.08	2.65611	19.0349	3.51302	964.237	-0.95	76.9358	343.859	0	11.3586	140	139.999	6.02275	6.02275	2.79047	177.544	0.000217455	2.93301e-06	1195229	1.56583	3.08468	0.512171
2021-03-19 10:40:00	OP-150m	UA-100m	MC	451.591	21.711	12.4539	3.38765	0.28056	-23.2	0.01297	2.494	2.468	1.046	3.096	0.08	2.65611	19.0349	3.51302	964.237	-0.95	76.9358	343.859	0	11.3586	140	139.999	6.02275	6.02275	2.79047	177.544	NA	1.3276e-06	281365	1.42595	NA	NA
2021-03-19 10:40:00	OP-200m	UA-100m	MC	451.591	21.711	12.4539	3.38765	0.28056	-23.2	0.01297	2.494	2.468	1.046	3.096	0.08	2.65611	19.0349	3.51302	964.237	-0.95	76.9358	343.859	0	11.3586	140	139.999	6.02275	6.02275	2.79047	177.544	NA	5.54068e-07	65564	1.38822	NA	NA
2021-03-19 10:40:00	OP-50m	UA-100m	MC	451.591	21.711	12.4539	3.38765	0.28056	-23.2	0.01297	2.494	2.468	1.046	3.096	0.08	2.65611	19.0349	3.51302	964.237	-0.95	76.9358	343.859	0	11.3586	140	139.999	6.02275	6.02275	2.79047	177.544	0.000578324	5.1215e-06	3121146	1.94835	3.54103	0.587942
2021-03-19 10:40:00	OP-UW	UA-100m	MC	451.591	21.711	12.4539	3.38765	0.28056	-23.2	0.01297	2.494	2.468	1.046	3.096	0.08	2.65611	19.0349	3.51302	964.237	-0.95	76.9358	343.859	0	11.3586	140	139.999	6.02275	6.02275	2.79047	177.544	0	NA	0	1.3795	NA	NA
2021-03-19 10:40:00	OP-100m	UA-150m	MC	451.591	20.698	11.5955	3.5373	0.29295	-26.3	0.01325	2.27	2.331	1.111	3.316	0.08	2.65611	19.0349	3.51302	964.237	-0.95	76.9358	343.859	0	11.3586	140	139.999	6.02275	6.02275	2.79047	177.544	NA	2.578e-06	1126971	1.56583	NA	NA
2021-03-19 10:40:00	OP-150m	UA-150m	MC	451.591	20.698	11.5955	3.5373	0.29295	-26.3	0.01325	2.27	2.331	1.111	3.316	0.08	2.65611	19.0349	3.51302	964.237	-0.95	76.9358	343.859	0	11.3586	140	139.999	6.02275	6.02275	2.79047	177.544	NA	1.24848e-06	202851	1.42595	NA	NA
2021-03-19 10:40:00	OP-200m	UA-150m	MC	451.591	20.698	11.5955	3.5373	0.29295	-26.3	0.01325	2.27	2.331	1.111	3.316	0.08	2.65611	19.0349	3.51302	964.237	-0.95	76.9358	343.859	0	11.3586	140	139.999	6.02275	6.02275	2.79047	177.544	NA	4.33833e-07	35247	1.38822	NA	NA
2021-03-19 10:40:00	OP-50m	UA-150m	MC	451.591	20.698	11.5955	3.5373	0.29295	-26.3	0.01325	2.27	2.331	1.111	3.316	0.08	2.65611	19.0349	3.51302	964.237	-0.95	76.9358	343.859	0	11.3586	140	139.999	6.02275	6.02275	2.79047	177.544	NA	6.08959e-06	3180530	1.94835	NA	NA
2021-03-19 10:40:00	OP-UW	UA-150m	MC	451.591	20.698	11.5955	3.5373	0.29295	-26.3	0.01325	2.27	2.331	1.111	3.316	0.08	2.65611	19.0349	3.51302	964.237	-0.95	76.9358	343.859	0	11.3586	140	139.999	6.02275	6.02275	2.79047	177.544	0	NA	0	1.3795	NA	NA
2021-03-19 10:50:00	OP-100m	UA-UW	MC	451.591	24.451	12.6067	3.20089	0.245114	-26	0.008661	2.369	2.864	1.336	4.379	0.2	2.73673	19.7475	3.70389	964.263	-1.13673	75.4726	282.741	0	12.5391	140	140.003	6.02292	6.02292	2.63534	175.27	0.000239029	3.04685e-06	1511570	1.61055	3.59947	0.597629
2021-03-19 10:50:00	OP-150m	UA-UW	MC	451.591	24.451	12.6067	3.20089	0.245114	-26	0.008661	2.369	2.864	1.336	4.379	0.2	2.73673	19.7475	3.70389	964.263	-1.13673	75.4726	282.741	0	12.5391	140	140.003	6.02292	6.02292	2.63534	175.27	NA	1.50572e-06	497430	1.44972	NA	NA
2021-03-19 10:50:00	OP-200m	UA-UW	MC	451.591	24.451	12.6067	3.20089	0.245114	-26	0.008661	2.369	2.864	1.336	4.379	0.2	2.73673	19.7475	3.70389	964.263	-1.13673	75.4726	282.741	0	12.5391	140	140.003	6.02292	6.02292	2.63534	175.27	NA	7.08672e-07	129335	1.39995	NA	NA
2021-03-19 10:50:00	OP-50m	UA-UW	MC	451.591	24.451	12.6067	3.20089	0.245114	-26	0.008661	2.369	2.864	1.336	4.379	0.2	2.73673	19.7475	3.70389	964.263	-1.13673	75.4726	282.741	0	12.5391	140	140.003	6.02292	6.02292	2.63534	175.27	0.000519439	4.54513e-06	3238523	2.00827	4.41279	0.732665
2021-03-19 10:50:00	OP-UW	UA-UW	MC	451.591	24.451	12.6067	3.20089	0.245114	-26	0.008661	2.369	2.864	1.336	4.379	0.2	2.73673	19.7475	3.70389	964.263	-1.13673	75.4726	282.741	0	12.5391	140	140.003	6.02292	6.02292	2.63534	175.27	0	NA	0	1.37156	NA	NA
2021-03-19 10:50:00	OP-100m	UA-50m	MC	451.591	27.483	13.1418	3.3596	0.270253	-33.3	0.01198	2.479	2.841	1.326	4.411	0.08	2.73673	19.7475	3.70389	964.263	-1.13673	75.4726	282.741	0	12.5391	140	140.003	6.02292	6.02292	2.63534	175.27	0.000256003	3.42608e-06	1710733	1.61055	3.36082	0.558004
2021-03-19 10:50:00	OP-150m	UA-50m	MC	451.591	27.483	13.1418	3.3596	0.270253	-33.3	0.01198	2.479	2.841	1.326	4.411	0.08	2.73673	19.7475	3.70389	964.263	-1.13673	75.4726	282.741	0	12.5391	140	140.003	6.02292	6.02292	2.63534	175.27	NA	2.07032e-06	774208	1.44972	NA	NA
2021-03-19 10:50:00	OP-200m	UA-50m	MC	451.591	27.483	13.1418	3.3596	0.270253	-33.3	0.01198	2.479	2.841	1.326	4.411	0.08	2.73673	19.7475	3.70389	964.263	-1.13673	75.4726	282.741	0	12.5391	140	140.003	6.02292	6.02292	2.63534	175.27	NA	1.12572e-06	333257	1.39995	NA	NA
2021-03-19 10:50:00	OP-50m	UA-50m	MC	451.591	27.483	13.1418	3.3596	0.270253	-33.3	0.01198	2.479	2.841	1.326	4.411	0.08	2.73673	19.7475	3.70389	964.263	-1.13673	75.4726	282.741	0	12.5391	140	140.003	6.02292	6.02292	2.63534	175.27	0.000490181	4.22755e-06	3316622	2.00827	4.67618	0.776397
2021-03-19 10:50:00	OP-UW	UA-50m	MC	451.591	27.483	13.1418	3.3596	0.270253	-33.3	0.01198	2.479	2.841	1.326	4.411	0.08	2.73673	19.7475	3.70389	964.263	-1.13673	75.4726	282.741	0	12.5391	140	140.003	6.02292	6.02292	2.63534	175.27	0	NA	0	1.37156	NA	NA
2021-03-19 10:50:00	OP-100m	UA-100m	MC	451.591	28.095	13.377	3.21484	0.313187	-33.8	0.02863	2.376	2.385	1.044	3.156	0.08	2.73673	19.7475	3.70389	964.263	-1.13673	75.4726	282.741	0	12.5391	140	140.003	6.02292	6.02292	2.63534	175.27	0.00027753	3.23869e-06	1715884	1.61055	3.10013	0.514721
2021-03-19 10:50:00	OP-150m	UA-100m	MC	451.591	28.095	13.377	3.21484	0.313187	-33.8	0.02863	2.376	2.385	1.044	3.156	0.08	2.73673	19.7475	3.70389	964.263	-1.13673	75.4726	282.741	0	12.5391	140	140.003	6.02292	6.02292	2.63534	175.27	NA	2.25305e-06	806065	1.44972	NA	NA
2021-03-19 10:50:00	OP-200m	UA-100m	MC	451.591	28.095	13.377	3.21484	0.313187	-33.8	0.02863	2.376	2.385	1.044	3.156	0.08	2.73673	19.7475	3.70389	964.263	-1.13673	75.4726	282.741	0	12.5391	140	140.003	6.02292	6.02292	2.63534	175.27	NA	1.30622e-06	354689	1.39995	NA	NA
2021-03-19 10:50:00	OP-50m	UA-100m	MC	451.591	28.095	13.377	3.21484	0.313187	-33.8	0.02863	2.376	2.385	1.044	3.156	0.08	2.73673	19.7475	3.70389	964.263	-1.13673	75.4726	282.741	0	12.5391	140	140.003	6.02292	6.02292	2.63534	175.27	0.000538779	5.04414e-06	3287940	2.00827	4.25439	0.706366
2021-03-19 10:50:00	OP-UW	UA-100m	MC	451.591	28.095	13.377	3.21484	0.313187	-33.8	0.02863	2.376	2.385	1.044	3.156	0.08	2.73673	19.7475	3.70389	964.263	-1.13673	75.4726	282.741	0	12.5391	140	140.003	6.02292	6.02292	2.63534	175.27	0	NA	0	1.37156	NA	NA
2021-03-19 10:50:00	OP-100m	UA-150m	MC	451.591	23.713	13.8052	3.29217	0.28895	-33.6	0.01816	2.292	2.7	1.181	3.653	0.08	2.73673	19.7475	3.70389	964.263	-1.13673	75.4726	282.741	0	12.5391	140	140.003	6.02292	6.02292	2.63534	175.27	0.000216921	6.78032e-06	1383887	1.61055	3.96633	0.658538
2021-03-19 10:50:00	OP-150m	UA-150m	MC	451.591	23.713	13.8052	3.29217	0.28895	-33.6	0.01816	2.292	2.7	1.181	3.653	0.08	2.73673	19.7475	3.70389	964.263	-1.13673	75.4726	282.741	0	12.5391	140	140.003	6.02292	6.02292	2.63534	175.27	NA	1.63277e-06	481773	1.44972	NA	NA
2021-03-19 10:50:00	OP-200m	UA-150m	MC	451.591	23.713	13.8052	3.29217	0.28895	-33.6	0.01816	2.292	2.7	1.181	3.653	0.08	2.73673	19.7475	3.70389	964.263	-1.13673	75.4726	282.741	0	12.5391	140	140.003	6.02292	6.02292	2.63534	175.27	NA	8.03065e-07	155097	1.39995	NA	NA
2021-03-19 10:50:00	OP-50m	UA-150m	MC	451.591	23.713	13.8052	3.29217	0.28895	-33.6	0.01816	2.292	2.7	1.181	3.653	0.08	2.73673	19.7475	3.70389	964.263	-1.13673	75.4726	282.741	0	12.5391	140	140.003	6.02292	6.02292	2.63534	175.27	0.000506282	4.47734e-06	3266230	2.00827	4.52747	0.751706
2021-03-19 10:50:00	OP-UW	UA-150m	MC	451.591	23.713	13.8052	3.29217	0.28895	-33.6	0.01816	2.292	2.7	1.181	3.653	0.08	2.73673	19.7475	3.70389	964.263	-1.13673	75.4726	282.741	0	12.5391	140	140.003	6.02292	6.02292	2.63534	175.27	0	NA	0	1.37156	NA	NA
2021-03-19 11:00:00	OP-100m	UA-UW	MC	451.591	38.199	13.1048	2.82302	0.216966	-14.2	0.00773	3.003	2.967	1.509	5.044	0.2	3.00487	30.7566	3.54593	964.2	-1.08673	73.992	336.763	0	12.7841	140	140.006	6.02307	6.02307	2.70679	173.087	0.000286829	3.46796e-06	1676921	1.65812	3.72548	0.618536
2021-03-19 11:00:00	OP-150m	UA-UW	MC	451.591	38.199	13.1048	2.82302	0.216966	-14.2	0.00773	3.003	2.967	1.509	5.044	0.2	3.00487	30.7566	3.54593	964.2	-1.08673	73.992	336.763	0	12.7841	140	140.006	6.02307	6.02307	2.70679	173.087	0.000185203	2.90156e-06	1066995	1.52291	3.14148	0.521576
2021-03-19 11:00:00	OP-200m	UA-UW	MC	451.591	38.199	13.1048	2.82302	0.216966	-14.2	0.00773	3.003	2.967	1.509	5.044	0.2	3.00487	30.7566	3.54593	964.2	-1.08673	73.992	336.763	0	12.7841	140	140.006	6.02307	6.02307	2.70679	173.087	0.000127785	2.60353e-06	725052	1.45949	2.76657	0.45933
2021-03-19 11:00:00	OP-50m	UA-UW	MC	451.591	38.199	13.1048	2.82302	0.216966	-14.2	0.00773	3.003	2.967	1.509	5.044	0.2	3.00487	30.7566	3.54593	964.2	-1.08673	73.992	336.763	0	12.7841	140	140.006	6.02307	6.02307	2.70679	173.087	0.000523738	6.30301e-06	3034236	1.88153	3.57597	0.593712
2021-03-19 11:00:00	OP-UW	UA-UW	MC	451.591	38.199	13.1048	2.82302	0.216966	-14.2	0.00773	3.003	2.967	1.509	5.044	0.2	3.00487	30.7566	3.54593	964.2	-1.08673	73.992	336.763	0	12.7841	140	140.006	6.02307	6.02307	2.70679	173.087	0	NA	0	1.36129	NA	NA
2021-03-19 11:00:00	OP-100m	UA-50m	MC	451.591	36.412	11.6347	3.13704	0.279822	-39.5	0.02003	2.759	2.104	1.396	4.96	0.08	3.00487	30.7566	3.54593	964.2	-1.08673	73.992	336.763	0	12.7841	140	140.006	6.02307	6.02307	2.70679	173.087	0.000276939	3.37538e-06	2018722	1.65812	3.85853	0.640625
2021-03-19 11:00:00	OP-150m	UA-50m	MC	451.591	36.412	11.6347	3.13704	0.279822	-39.5	0.02003	2.759	2.104	1.396	4.96	0.08	3.00487	30.7566	3.54593	964.2	-1.08673	73.992	336.763	0	12.7841	140	140.006	6.02307	6.02307	2.70679	173.087	0.000184193	2.69801e-06	1369338	1.52291	3.15872	0.524438
2021-03-19 11:00:00	OP-200m	UA-50m	MC	451.591	36.412	11.6347	3.13704	0.279822	-39.5	0.02003	2.759	2.104	1.396	4.96	0.08	3.00487	30.7566	3.54593	964.2	-1.08673	73.992	336.763	0	12.7841	140	140.006	6.02307	6.02307	2.70679	173.087	0.000129202	1.89688e-06	961292	1.45949	2.73624	0.454293
2021-03-19 11:00:00	OP-50m	UA-50m	MC	451.591	36.412	11.6347	3.13704	0.279822	-39.5	0.02003	2.759	2.104	1.396	4.96	0.08	3.00487	30.7566	3.54593	964.2	-1.08673	73.992	336.763	0	12.7841	140	140.006	6.02307	6.02307	2.70679	173.087	0.000463223	3.92361e-06	3436361	1.88153	4.04314	0.671275
2021-03-19 11:00:00	OP-UW	UA-50m	MC	451.591	36.412	11.6347	3.13704	0.279822	-39.5	0.02003	2.759	2.104	1.396	4.96	0.08	3.00487	30.7566	3.54593	964.2	-1.08673	73.992	336.763	0	12.7841	140	140.006	6.02307	6.02307	2.70679	173.087	0	NA	0	1.36129	NA	NA
2021-03-19 11:00:00	OP-100m	UA-100m	MC	451.591	38.2	10.5931	3.23407	0.253852	-18.8	0.009492	2.688	2.271	1.237	3.691	0.08	3.00487	30.7566	3.54593	964.2	-1.08673	73.992	336.763	0	12.7841	140	140.006	6.02307	6.02307	2.70679	173.087	0.00032233	3.75335e-06	1830145	1.65812	3.31516	0.550411
2021-03-19 11:00:00	OP-150m	UA-100m	MC	451.591	38.2	10.5931	3.23407	0.253852	-18.8	0.009492	2.688	2.271	1.237	3.691	0.08	3.00487	30.7566	3.54593	964.2	-1.08673	73.992	336.763	0	12.7841	140	140.006	6.02307	6.02307	2.70679	173.087	0.00021578	3.15787e-06	1225552	1.52291	2.69633	0.447668
2021-03-19 11:00:00	OP-200m	UA-100m	MC	451.591	38.2	10.5931	3.23407	0.253852	-18.8	0.009492	2.688	2.271	1.237	3.691	0.08	3.00487	30.7566	3.54593	964.2	-1.08673	73.992	336.763	0	12.7841	140	140.006	6.02307	6.02307	2.70679	173.087	0.000155997	2.53446e-06	893196	1.45949	2.26625	0.376261
2021-03-19 11:00:00	OP-50m	UA-100m	MC	451.591	38.2	10.5931	3.23407	0.253852	-18.8	0.009492	2.688	2.271	1.237	3.691	0.08	3.00487	30.7566	3.54593	964.2	-1.08673	73.992	336.763	0	12.7841	140	140.006	6.02307	6.02307	2.70679	173.087	0.000540742	4.87286e-06	3083633	1.88153	3.46352	0.575043
2021-03-19 11:00:00	OP-UW	UA-100m	MC	451.591	38.2	10.5931	3.23407	0.253852	-18.8	0.009492	2.688	2.271	1.237	3.691	0.08	3.00487	30.7566	3.54593	964.2	-1.08673	73.992	336.763	0	12.7841	140	140.006	6.02307	6.02307	2.70679	173.087	0	NA	0	1.36129	NA	NA
2021-03-19 11:00:00	OP-100m	UA-150m	MC	451.591	38.117	10.9676	3.17823	0.319274	-24.1	0.03059	2.344	1.912	1.092	3.233	0.08	3.00487	30.7566	3.54593	964.2	-1.08673	73.992	336.763	0	12.7841	140	140.006	6.02307	6.02307	2.70679	173.087	0.000284379	3.19248e-06	1824047	1.65812	3.75757	0.623864
2021-03-19 11:00:00	OP-150m	UA-150m	MC	451.591	38.117	10.9676	3.17823	0.319274	-24.1	0.03059	2.344	1.912	1.092	3.233	0.08	3.00487	30.7566	3.54593	964.2	-1.08673	73.992	336.763	0	12.7841	140	140.006	6.02307	6.02307	2.70679	173.087	0.000189757	3.18023e-06	1223030	1.52291	3.0661	0.509059
2021-03-19 11:00:00	OP-200m	UA-150m	MC	451.591	38.117	10.9676	3.17823	0.319274	-24.1	0.03059	2.344	1.912	1.092	3.233	0.08	3.00487	30.7566	3.54593	964.2	-1.08673	73.992	336.763	0	12.7841	140	140.006	6.02307	6.02307	2.70679	173.087	0.000137986	2.24822e-06	889285	1.45949	2.56205	0.425374
2021-03-19 11:00:00	OP-50m	UA-150m	MC	451.591	38.117	10.9676	3.17823	0.319274	-24.1	0.03059	2.344	1.912	1.092	3.233	0.08	3.00487	30.7566	3.54593	964.2	-1.08673	73.992	336.763	0	12.7841	140	140.006	6.02307	6.02307	2.70679	173.087	0.000484194	4.05815e-06	3135051	1.88153	3.86802	0.642201
2021-03-19 11:00:00	OP-UW	UA-150m	MC	451.591	38.117	10.9676	3.17823	0.319274	-24.1	0.03059	2.344	1.912	1.092	3.233	0.08	3.00487	30.7566	3.54593	964.2	-1.08673	73.992	336.763	0	12.7841	140	140.006	6.02307	6.02307	2.70679	173.087	0	NA	0	1.36129	NA	NA
2021-03-19 11:10:00	OP-100m	UA-50m	MC	451.591	36.435	13.2163	3.28398	0.268209	-48.1	0.01362	3.201	2.588	1.729	8.27	0.08	3.18979	37.2238	3.39398	964.2	-1.67413	70.0552	259.865	0	13.0523	140	140	6.02281	6.02281	2.83346	161.338	0.000239242	2.55927e-06	2127318	NA	NA	NA
2021-03-19 11:10:00	OP-150m	UA-50m	MC	451.591	36.435	13.2163	3.28398	0.268209	-48.1	0.01362	3.201	2.588	1.729	8.27	0.08	3.18979	37.2238	3.39398	964.2	-1.67413	70.0552	259.865	0	13.0523	140	140	6.02281	6.02281	2.83346	161.338	0.000161325	2.0639e-06	1431702	NA	NA	NA
2021-03-19 11:10:00	OP-200m	UA-50m	MC	451.591	36.435	13.2163	3.28398	0.268209	-48.1	0.01362	3.201	2.588	1.729	8.27	0.08	3.18979	37.2238	3.39398	964.2	-1.67413	70.0552	259.865	0	13.0523	140	140	6.02281	6.02281	2.83346	161.338	0.000109315	1.72458e-06	982270	NA	NA	NA
2021-03-19 11:10:00	OP-50m	UA-50m	MC	451.591	36.435	13.2163	3.28398	0.268209	-48.1	0.01362	3.201	2.588	1.729	8.27	0.08	3.18979	37.2238	3.39398	964.2	-1.67413	70.0552	259.865	0	13.0523	140	140	6.02281	6.02281	2.83346	161.338	0.000409657	3.37477e-06	3626113	NA	NA	NA
2021-03-19 11:10:00	OP-UW	UA-50m	MC	451.591	36.435	13.2163	3.28398	0.268209	-48.1	0.01362	3.201	2.588	1.729	8.27	0.08	3.18979	37.2238	3.39398	964.2	-1.67413	70.0552	259.865	0	13.0523	140	140	6.02281	6.02281	2.83346	161.338	0	NA	0	NA	NA	NA
2021-03-19 11:30:00	OP-100m	UA-UW	MC	451.591	37.173	15.6245	3.98146	0.359306	-39.2	0.0204	2.76	3.048	1.192	3.754	0.2	3.96486	35.0035	4.41193	964.1	-2.54691	62.3217	623.783	0	NA	NA	NA	NA	0	4.71099	0.00570668	0.00023813	2.67141e-06	1932471	NA	NA	NA
2021-03-19 11:30:00	OP-150m	UA-UW	MC	451.591	37.173	15.6245	3.98146	0.359306	-39.2	0.0204	2.76	3.048	1.192	3.754	0.2	3.96486	35.0035	4.41193	964.1	-2.54691	62.3217	623.783	0	NA	NA	NA	NA	0	4.71099	0.00570668	0.000150239	1.95472e-06	1242154	NA	NA	NA
2021-03-19 11:30:00	OP-200m	UA-UW	MC	451.591	37.173	15.6245	3.98146	0.359306	-39.2	0.0204	2.76	3.048	1.192	3.754	0.2	3.96486	35.0035	4.41193	964.1	-2.54691	62.3217	623.783	0	NA	NA	NA	NA	0	4.71099	0.00570668	0.000103184	1.87829e-06	841143	1.32098	NA	NA
2021-03-19 11:30:00	OP-50m	UA-UW	MC	451.591	37.173	15.6245	3.98146	0.359306	-39.2	0.0204	2.76	3.048	1.192	3.754	0.2	3.96486	35.0035	4.41193	964.1	-2.54691	62.3217	623.783	0	NA	NA	NA	NA	0	4.71099	0.00570668	0.000405661	3.4571e-06	3313655	1.32282	NA	NA
2021-03-19 11:30:00	OP-UW	UA-UW	MC	451.591	37.173	15.6245	3.98146	0.359306	-39.2	0.0204	2.76	3.048	1.192	3.754	0.2	3.96486	35.0035	4.41193	964.1	-2.54691	62.3217	623.783	0	NA	NA	NA	NA	0	4.71099	0.00570668	0	NA	0	NA	NA	NA
2021-03-19 11:30:00	OP-100m	UA-50m	MC	451.591	33.757	11.7287	4.00271	0.286661	-29.2	0.006344	3.771	2.657	1.939	10.463	0.08	3.96486	35.0035	4.41193	964.1	-2.54691	62.3217	623.783	0	NA	NA	NA	NA	0	4.71099	0.00570668	0.00019768	2.34886e-06	2034299	NA	NA	NA
2021-03-19 11:30:00	OP-150m	UA-50m	MC	451.591	33.757	11.7287	4.00271	0.286661	-29.2	0.006344	3.771	2.657	1.939	10.463	0.08	3.96486	35.0035	4.41193	964.1	-2.54691	62.3217	623.783	0	NA	NA	NA	NA	0	4.71099	0.00570668	0.000124106	1.6863e-06	1305301	NA	NA	NA
2021-03-19 11:30:00	OP-200m	UA-50m	MC	451.591	33.757	11.7287	4.00271	0.286661	-29.2	0.006344	3.771	2.657	1.939	10.463	0.08	3.96486	35.0035	4.41193	964.1	-2.54691	62.3217	623.783	0	NA	NA	NA	NA	0	4.71099	0.00570668	7.5089e-05	1.30226e-06	792502	1.32098	NA	NA
2021-03-19 11:30:00	OP-50m	UA-50m	MC	451.591	33.757	11.7287	4.00271	0.286661	-29.2	0.006344	3.771	2.657	1.939	10.463	0.08	3.96486	35.0035	4.41193	964.1	-2.54691	62.3217	623.783	0	NA	NA	NA	NA	0	4.71099	0.00570668	0.000333415	2.8588e-06	3478817	1.32282	NA	NA
2021-03-19 11:30:00	OP-UW	UA-50m	MC	451.591	33.757	11.7287	4.00271	0.286661	-29.2	0.006344	3.771	2.657	1.939	10.463	0.08	3.96486	35.0035	4.41193	964.1	-2.54691	62.3217	623.783	0	NA	NA	NA	NA	0	4.71099	0.00570668	0	NA	0	NA	NA	NA
2021-03-19 11:30:00	OP-100m	UA-150m	MC	451.591	37.269	12.2222	4.2844	0.35537	-25.9	0.01335	2.895	2.443	1.213	3.715	0.08	3.96486	35.0035	4.41193	964.1	-2.54691	62.3217	623.783	0	NA	NA	NA	NA	0	4.71099	0.00570668	0.000237845	2.76697e-06	1910932	NA	NA	NA
2021-03-19 11:30:00	OP-150m	UA-150m	MC	451.591	37.269	12.2222	4.2844	0.35537	-25.9	0.01335	2.895	2.443	1.213	3.715	0.08	3.96486	35.0035	4.41193	964.1	-2.54691	62.3217	623.783	0	NA	NA	NA	NA	0	4.71099	0.00570668	0.000156983	2.35527e-06	1263666	NA	NA	NA
2021-03-19 11:30:00	OP-200m	UA-150m	MC	451.591	37.269	12.2222	4.2844	0.35537	-25.9	0.01335	2.895	2.443	1.213	3.715	0.08	3.96486	35.0035	4.41193	964.1	-2.54691	62.3217	623.783	0	NA	NA	NA	NA	0	4.71099	0.00570668	0.000111951	3.55452e-06	864872	1.32098	NA	NA
2021-03-19 11:30:00	OP-50m	UA-150m	MC	451.591	37.269	12.2222	4.2844	0.35537	-25.9	0.01335	2.895	2.443	1.213	3.715	0.08	3.96486	35.0035	4.41193	964.1	-2.54691	62.3217	623.783	0	NA	NA	NA	NA	0	4.71099	0.00570668	0.000406783	3.61104e-06	3246526	1.32282	NA	NA
2021-03-19 11:30:00	OP-UW	UA-150m	MC	451.591	37.269	12.2222	4.2844	0.35537	-25.9	0.01335	2.895	2.443	1.213	3.715	0.08	3.96486	35.0035	4.41193	964.1	-2.54691	62.3217	623.783	0	NA	NA	NA	NA	0	4.71099	0.00570668	0	NA	0	NA	NA	NA
2021-03-19 11:40:00	OP-100m	UA-UW	MC	451.591	33.24	13.3271	4.22817	0.396783	-40.3	0.02429	2.636	2.405	1.155	3.593	0.2	4.24487	37.0386	4.91505	964.137	-2.88673	59.8124	630.418	0	8.14527	140	88.8755	3.82343	3.82343	5.33092	110.998	0.000226472	2.45576e-06	1981868	1.42118	1.44184	NA
2021-03-19 11:40:00	OP-150m	UA-UW	MC	451.591	33.24	13.3271	4.22817	0.396783	-40.3	0.02429	2.636	2.405	1.155	3.593	0.2	4.24487	37.0386	4.91505	964.137	-2.88673	59.8124	630.418	0	8.14527	140	88.8755	3.82343	3.82343	5.33092	110.998	0.000134063	1.79316e-06	1188643	1.3839	1.43459	NA
2021-03-19 11:40:00	OP-200m	UA-UW	MC	451.591	33.24	13.3271	4.22817	0.396783	-40.3	0.02429	2.636	2.405	1.155	3.593	0.2	4.24487	37.0386	4.91505	964.137	-2.88673	59.8124	630.418	0	8.14527	140	88.8755	3.82343	3.82343	5.33092	110.998	8.23998e-05	1.49306e-06	717392	1.36282	1.41276	NA
2021-03-19 11:40:00	OP-50m	UA-UW	MC	451.591	33.24	13.3271	4.22817	0.396783	-40.3	0.02429	2.636	2.405	1.155	3.593	0.2	4.24487	37.0386	4.91505	964.137	-2.88673	59.8124	630.418	0	8.14527	140	88.8755	3.82343	3.82343	5.33092	110.998	0.000392809	3.48637e-06	3388050	1.5014	1.56648	NA
2021-03-19 11:40:00	OP-UW	UA-UW	MC	451.591	33.24	13.3271	4.22817	0.396783	-40.3	0.02429	2.636	2.405	1.155	3.593	0.2	4.24487	37.0386	4.91505	964.137	-2.88673	59.8124	630.418	0	8.14527	140	88.8755	3.82343	3.82343	5.33092	110.998	0	NA	0	1.33048	NA	NA
2021-03-19 11:40:00	OP-100m	UA-50m	MC	451.591	34.891	11.7955	4.45256	0.362916	-35.8	0.01294	3.197	2.421	1.576	6.396	0.08	4.24487	37.0386	4.91505	964.137	-2.88673	59.8124	630.418	0	8.14527	140	88.8755	3.82343	3.82343	5.33092	110.998	0.000189577	2.08528e-06	2042924	1.42118	1.72246	NA
2021-03-19 11:40:00	OP-150m	UA-50m	MC	451.591	34.891	11.7955	4.45256	0.362916	-35.8	0.01294	3.197	2.421	1.576	6.396	0.08	4.24487	37.0386	4.91505	964.137	-2.88673	59.8124	630.418	0	8.14527	140	88.8755	3.82343	3.82343	5.33092	110.998	0.000123227	1.86572e-06	1312780	1.3839	1.56074	NA
2021-03-19 11:40:00	OP-200m	UA-50m	MC	451.591	34.891	11.7955	4.45256	0.362916	-35.8	0.01294	3.197	2.421	1.576	6.396	0.08	4.24487	37.0386	4.91505	964.137	-2.88673	59.8124	630.418	0	8.14527	140	88.8755	3.82343	3.82343	5.33092	110.998	7.73243e-05	1.24413e-06	851927	1.36282	1.5055	NA
2021-03-19 11:40:00	OP-50m	UA-50m	MC	451.591	34.891	11.7955	4.45256	0.362916	-35.8	0.01294	3.197	2.421	1.576	6.396	0.08	4.24487	37.0386	4.91505	964.137	-2.88673	59.8124	630.418	0	8.14527	140	88.8755	3.82343	3.82343	5.33092	110.998	0.000314925	2.60681e-06	3432569	1.5014	1.95388	NA
2021-03-19 11:40:00	OP-UW	UA-50m	MC	451.591	34.891	11.7955	4.45256	0.362916	-35.8	0.01294	3.197	2.421	1.576	6.396	0.08	4.24487	37.0386	4.91505	964.137	-2.88673	59.8124	630.418	0	8.14527	140	88.8755	3.82343	3.82343	5.33092	110.998	0	NA	0	1.33048	NA	NA
2021-03-19 11:40:00	OP-100m	UA-150m	MC	451.591	35.56	12.7994	4.92423	0.413242	-36	0.01489	2.867	2.48	1.165	3.602	0.08	4.24487	37.0386	4.91505	964.137	-2.88673	59.8124	630.418	0	8.14527	140	88.8755	3.82343	3.82343	5.33092	110.998	0.000220004	2.56239e-06	1984884	1.42118	1.48424	NA
2021-03-19 11:40:00	OP-150m	UA-150m	MC	451.591	35.56	12.7994	4.92423	0.413242	-36	0.01489	2.867	2.48	1.165	3.602	0.08	4.24487	37.0386	4.91505	964.137	-2.88673	59.8124	630.418	0	8.14527	140	88.8755	3.82343	3.82343	5.33092	110.998	0.000144449	1.88293e-06	1323057	1.3839	1.33144	NA
2021-03-19 11:40:00	OP-200m	UA-150m	MC	451.591	35.56	12.7994	4.92423	0.413242	-36	0.01489	2.867	2.48	1.165	3.602	0.08	4.24487	37.0386	4.91505	964.137	-2.88673	59.8124	630.418	0	8.14527	140	88.8755	3.82343	3.82343	5.33092	110.998	9.48495e-05	1.63949e-06	862092	1.36282	1.22733	NA
2021-03-19 11:40:00	OP-50m	UA-150m	MC	451.591	35.56	12.7994	4.92423	0.413242	-36	0.01489	2.867	2.48	1.165	3.602	0.08	4.24487	37.0386	4.91505	964.137	-2.88673	59.8124	630.418	0	8.14527	140	88.8755	3.82343	3.82343	5.33092	110.998	0.000375292	3.94019e-06	3351506	1.5014	1.63959	NA
2021-03-19 11:40:00	OP-UW	UA-150m	MC	451.591	35.56	12.7994	4.92423	0.413242	-36	0.01489	2.867	2.48	1.165	3.602	0.08	4.24487	37.0386	4.91505	964.137	-2.88673	59.8124	630.418	0	8.14527	140	88.8755	3.82343	3.82343	5.33092	110.998	0	NA	0	1.33048	NA	NA
2021-03-19 11:50:00	OP-100m	UA-UW	MC	451.591	46.92	14.146	3.55092	0.347728	-33.3	0.02823	2.663	2.478	1.37	4.717	0.2	4.44938	43.4077	4.88495	964.237	-2.56327	60.1133	510.589	0	10.2017	140	139.994	6.02252	6.02252	4.79741	169.648	0.000214164	2.33864e-06	1940224	1.55751	3.74391	0.621651
2021-03-19 11:50:00	OP-150m	UA-UW	MC	451.591	46.92	14.146	3.55092	0.347728	-33.3	0.02823	2.663	2.478	1.37	4.717	0.2	4.44938	43.4077	4.88495	964.237	-2.56327	60.1133	510.589	0	10.2017	140	139.994	6.02252	6.02252	4.79741	169.648	0.000144164	1.87411e-06	1308692	1.48921	3.85627	0.640308
2021-03-19 11:50:00	OP-200m	UA-UW	MC	451.591	46.92	14.146	3.55092	0.347728	-33.3	0.02823	2.663	2.478	1.37	4.717	0.2	4.44938	43.4077	4.88495	964.237	-2.56327	60.1133	510.589	0	10.2017	140	139.994	6.02252	6.02252	4.79741	169.648	0.000105093	1.57486e-06	951364	1.44952	3.93031	0.652602
2021-03-19 11:50:00	OP-50m	UA-UW	MC	451.591	46.92	14.146	3.55092	0.347728	-33.3	0.02823	2.663	2.478	1.37	4.717	0.2	4.44938	43.4077	4.88495	964.237	-2.56327	60.1133	510.589	0	10.2017	140	139.994	6.02252	6.02252	4.79741	169.648	0.00037292	3.21796e-06	3318080	1.68226	3.35434	0.556966
2021-03-19 11:50:00	OP-UW	UA-UW	MC	451.591	46.92	14.146	3.55092	0.347728	-33.3	0.02823	2.663	2.478	1.37	4.717	0.2	4.44938	43.4077	4.88495	964.237	-2.56327	60.1133	510.589	0	10.2017	140	139.994	6.02252	6.02252	4.79741	169.648	0	NA	0	1.33479	NA	NA
2021-03-19 11:50:00	OP-100m	UA-50m	MC	451.591	36.632	13.0931	3.585	0.195816	-13	0.0009474	5.071	3.83	2.908	27.096	0.08	4.44938	43.4077	4.88495	964.237	-2.56327	60.1133	510.589	0	10.2017	140	139.994	6.02252	6.02252	4.79741	169.648	0.000177124	2.34565e-06	1768656	1.55751	4.52684	0.751651
2021-03-19 11:50:00	OP-150m	UA-50m	MC	451.591	36.632	13.0931	3.585	0.195816	-13	0.0009474	5.071	3.83	2.908	27.096	0.08	4.44938	43.4077	4.88495	964.237	-2.56327	60.1133	510.589	0	10.2017	140	139.994	6.02252	6.02252	4.79741	169.648	0.00011089	1.92008e-06	1096077	1.48921	5.01339	0.83244
2021-03-19 11:50:00	OP-200m	UA-50m	MC	451.591	36.632	13.0931	3.585	0.195816	-13	0.0009474	5.071	3.83	2.908	27.096	0.08	4.44938	43.4077	4.88495	964.237	-2.56327	60.1133	510.589	0	10.2017	140	139.994	6.02252	6.02252	4.79741	169.648	7.5093e-05	1.58496e-06	743608	1.44952	5.50051	0.913323
2021-03-19 11:50:00	OP-50m	UA-50m	MC	451.591	36.632	13.0931	3.585	0.195816	-13	0.0009474	5.071	3.83	2.908	27.096	0.08	4.44938	43.4077	4.88495	964.237	-2.56327	60.1133	510.589	0	10.2017	140	139.994	6.02252	6.02252	4.79741	169.648	0.000333585	3.44798e-06	3292224	1.68226	3.74987	0.622641
2021-03-19 11:50:00	OP-UW	UA-50m	MC	451.591	36.632	13.0931	3.585	0.195816	-13	0.0009474	5.071	3.83	2.908	27.096	0.08	4.44938	43.4077	4.88495	964.237	-2.56327	60.1133	510.589	0	10.2017	140	139.994	6.02252	6.02252	4.79741	169.648	0	NA	0	1.33479	NA	NA
2021-03-19 11:50:00	OP-100m	UA-100m	MC	451.591	42.788	12.4589	3.8443	0.380177	-39.2	0.03113	2.502	2.16	1.18	3.691	0.08	4.44938	43.4077	4.88495	964.237	-2.56327	60.1133	510.589	0	10.2017	140	139.994	6.02252	6.02252	4.79741	169.648	0.000232328	2.485e-06	1988839	1.55751	3.4512	0.573049
2021-03-19 11:50:00	OP-150m	UA-100m	MC	451.591	42.788	12.4589	3.8443	0.380177	-39.2	0.03113	2.502	2.16	1.18	3.691	0.08	4.44938	43.4077	4.88495	964.237	-2.56327	60.1133	510.589	0	10.2017	140	139.994	6.02252	6.02252	4.79741	169.648	0.000161897	2.46265e-06	1362090	1.48921	3.43387	0.570172
2021-03-19 11:50:00	OP-200m	UA-100m	MC	451.591	42.788	12.4589	3.8443	0.380177	-39.2	0.03113	2.502	2.16	1.18	3.691	0.08	4.44938	43.4077	4.88495	964.237	-2.56327	60.1133	510.589	0	10.2017	140	139.994	6.02252	6.02252	4.79741	169.648	0.000120366	1.89463e-06	1019466	1.44952	3.43162	0.569798
2021-03-19 11:50:00	OP-50m	UA-100m	MC	451.591	42.788	12.4589	3.8443	0.380177	-39.2	0.03113	2.502	2.16	1.18	3.691	0.08	4.44938	43.4077	4.88495	964.237	-2.56327	60.1133	510.589	0	10.2017	140	139.994	6.02252	6.02252	4.79741	169.648	0.000392686	3.82722e-06	3320030	1.68226	3.1855	0.528931
2021-03-19 11:50:00	OP-UW	UA-100m	MC	451.591	42.788	12.4589	3.8443	0.380177	-39.2	0.03113	2.502	2.16	1.18	3.691	0.08	4.44938	43.4077	4.88495	964.237	-2.56327	60.1133	510.589	0	10.2017	140	139.994	6.02252	6.02252	4.79741	169.648	0	NA	0	1.33479	NA	NA
2021-03-19 11:50:00	OP-100m	UA-150m	MC	451.591	43.267	11.9487	3.92648	0.370855	-41.6	0.02591	2.548	2.159	1.206	3.825	0.08	4.44938	43.4077	4.88495	964.237	-2.56327	60.1133	510.589	0	10.2017	140	139.994	6.02252	6.02252	4.79741	169.648	0.000238212	4.80576e-06	1972159	1.55751	3.36594	0.558893
2021-03-19 11:50:00	OP-150m	UA-150m	MC	451.591	43.267	11.9487	3.92648	0.370855	-41.6	0.02591	2.548	2.159	1.206	3.825	0.08	4.44938	43.4077	4.88495	964.237	-2.56327	60.1133	510.589	0	10.2017	140	139.994	6.02252	6.02252	4.79741	169.648	0.000161426	2.35261e-06	1367952	1.48921	3.4439	0.571837
2021-03-19 11:50:00	OP-200m	UA-150m	MC	451.591	43.267	11.9487	3.92648	0.370855	-41.6	0.02591	2.548	2.159	1.206	3.825	0.08	4.44938	43.4077	4.88495	964.237	-2.56327	60.1133	510.589	0	10.2017	140	139.994	6.02252	6.02252	4.79741	169.648	0.000123577	1.84813e-06	1047532	1.44952	3.34245	0.554992
2021-03-19 11:50:00	OP-50m	UA-150m	MC	451.591	43.267	11.9487	3.92648	0.370855	-41.6	0.02591	2.548	2.159	1.206	3.825	0.08	4.44938	43.4077	4.88495	964.237	-2.56327	60.1133	510.589	0	10.2017	140	139.994	6.02252	6.02252	4.79741	169.648	0.000401174	3.48005e-06	3390286	1.68226	3.1181	0.517739
2021-03-19 11:50:00	OP-UW	UA-150m	MC	451.591	43.267	11.9487	3.92648	0.370855	-41.6	0.02591	2.548	2.159	1.206	3.825	0.08	4.44938	43.4077	4.88495	964.237	-2.56327	60.1133	510.589	0	10.2017	140	139.994	6.02252	6.02252	4.79741	169.648	0	NA	0	1.33479	NA	NA
2021-03-19 12:00:00	OP-100m	UA-UW	MC	451.591	46.82	14.5865	4.30393	0.366983	-39.8	0.01579	2.719	3.082	1.392	4.952	0.2	4.38858	46.526	4.99505	964.3	-3.35399	56.6473	467.14	0	11.3222	140	140.001	6.02282	6.02282	4.57509	167.745	0.000209533	2.29186e-06	2017724	1.58242	4.35482	0.723053
2021-03-19 12:00:00	OP-150m	UA-UW	MC	451.591	46.82	14.5865	4.30393	0.366983	-39.8	0.01579	2.719	3.082	1.392	4.952	0.2	4.38858	46.526	4.99505	964.3	-3.35399	56.6473	467.14	0	11.3222	140	140.001	6.02282	6.02282	4.57509	167.745	0.000142862	1.95132e-06	1385473	1.50237	4.36985	0.725548
2021-03-19 12:00:00	OP-200m	UA-UW	MC	451.591	46.82	14.5865	4.30393	0.366983	-39.8	0.01579	2.719	3.082	1.392	4.952	0.2	4.38858	46.526	4.99505	964.3	-3.35399	56.6473	467.14	0	11.3222	140	140.001	6.02282	6.02282	4.57509	167.745	0.000101518	1.6087e-06	990682	1.45622	4.51285	0.749292
2021-03-19 12:00:00	OP-50m	UA-UW	MC	451.591	46.82	14.5865	4.30393	0.366983	-39.8	0.01579	2.719	3.082	1.392	4.952	0.2	4.38858	46.526	4.99505	964.3	-3.35399	56.6473	467.14	0	11.3222	140	140.001	6.02282	6.02282	4.57509	167.745	0.000354731	2.86288e-06	3444908	1.6986	3.75136	0.622857
2021-03-19 12:00:00	OP-UW	UA-UW	MC	451.591	46.82	14.5865	4.30393	0.366983	-39.8	0.01579	2.719	3.082	1.392	4.952	0.2	4.38858	46.526	4.99505	964.3	-3.35399	56.6473	467.14	0	11.3222	140	140.001	6.02282	6.02282	4.57509	167.745	0	NA	0	1.32896	NA	NA
2021-03-19 12:00:00	OP-100m	UA-50m	MC	451.591	36.049	11.9595	4.40638	0.207767	-14.2	0.0003141	5.798	3.9	2.945	28.898	0.08	4.38858	46.526	4.99505	964.3	-3.35399	56.6473	467.14	0	11.3222	140	140.001	6.02282	6.02282	4.57509	167.745	0.000176607	2.39966e-06	1888706	1.58242	5.16672	0.857857
2021-03-19 12:00:00	OP-150m	UA-50m	MC	451.591	36.049	11.9595	4.40638	0.207767	-14.2	0.0003141	5.798	3.9	2.945	28.898	0.08	4.38858	46.526	4.99505	964.3	-3.35399	56.6473	467.14	0	11.3222	140	140.001	6.02282	6.02282	4.57509	167.745	0.000111943	1.84927e-06	1211328	1.50237	5.57681	0.925946
2021-03-19 12:00:00	OP-200m	UA-50m	MC	451.591	36.049	11.9595	4.40638	0.207767	-14.2	0.0003141	5.798	3.9	2.945	28.898	0.08	4.38858	46.526	4.99505	964.3	-3.35399	56.6473	467.14	0	11.3222	140	140.001	6.02282	6.02282	4.57509	167.745	7.43448e-05	1.46451e-06	816026	1.45622	6.16229	1.02316
2021-03-19 12:00:00	OP-50m	UA-50m	MC	451.591	36.049	11.9595	4.40638	0.207767	-14.2	0.0003141	5.798	3.9	2.945	28.898	0.08	4.38858	46.526	4.99505	964.3	-3.35399	56.6473	467.14	0	11.3222	140	140.001	6.02282	6.02282	4.57509	167.745	0.000313681	3.33437e-06	3361889	1.6986	4.24229	0.704369
2021-03-19 12:00:00	OP-UW	UA-50m	MC	451.591	36.049	11.9595	4.40638	0.207767	-14.2	0.0003141	5.798	3.9	2.945	28.898	0.08	4.38858	46.526	4.99505	964.3	-3.35399	56.6473	467.14	0	11.3222	140	140.001	6.02282	6.02282	4.57509	167.745	0	NA	0	1.32896	NA	NA
2021-03-19 12:00:00	OP-100m	UA-100m	MC	451.591	38.568	11.3814	4.51138	0.333645	-34.5	0.007801	3.396	2.506	1.435	5.177	0.08	4.38858	46.526	4.99505	964.3	-3.35399	56.6473	467.14	0	11.3222	140	140.001	6.02282	6.02282	4.57509	167.745	0.00022487	2.55761e-06	2021497	1.58242	4.05781	0.673739
2021-03-19 12:00:00	OP-150m	UA-100m	MC	451.591	38.568	11.3814	4.51138	0.333645	-34.5	0.007801	3.396	2.506	1.435	5.177	0.08	4.38858	46.526	4.99505	964.3	-3.35399	56.6473	467.14	0	11.3222	140	140.001	6.02282	6.02282	4.57509	167.745	0.000153958	2.00235e-06	1402452	1.50237	4.05492	0.673259
2021-03-19 12:00:00	OP-200m	UA-100m	MC	451.591	38.568	11.3814	4.51138	0.333645	-34.5	0.007801	3.396	2.506	1.435	5.177	0.08	4.38858	46.526	4.99505	964.3	-3.35399	56.6473	467.14	0	11.3222	140	140.001	6.02282	6.02282	4.57509	167.745	0.000115302	1.89504e-06	1032260	1.45622	3.97332	0.659711
2021-03-19 12:00:00	OP-50m	UA-100m	MC	451.591	38.568	11.3814	4.51138	0.333645	-34.5	0.007801	3.396	2.506	1.435	5.177	0.08	4.38858	46.526	4.99505	964.3	-3.35399	56.6473	467.14	0	11.3222	140	140.001	6.02282	6.02282	4.57509	167.745	0.000378262	3.36972e-06	3406835	1.6986	3.518	0.584111
2021-03-19 12:00:00	OP-UW	UA-100m	MC	451.591	38.568	11.3814	4.51138	0.333645	-34.5	0.007801	3.396	2.506	1.435	5.177	0.08	4.38858	46.526	4.99505	964.3	-3.35399	56.6473	467.14	0	11.3222	140	140.001	6.02282	6.02282	4.57509	167.745	0	NA	0	1.32896	NA	NA
2021-03-19 12:00:00	OP-100m	UA-150m	MC	451.591	40.244	11.3297	4.46331	0.454632	-60	0.03688	2.58	1.819	1.074	3.335	0.08	4.38858	46.526	4.99505	964.3	-3.35399	56.6473	467.14	0	11.3222	140	140.001	6.02282	6.02282	4.57509	167.745	0.000218918	2.338e-06	2058629	1.58242	4.16814	0.692057
[truncated: 12,539 more rows]
